# Supplementary material for: Nitrogen fixing bacteria facilitate microbial biodegradation of a bio-based and biodegradable plastic in soils under ambient and future climatic conditions
Source: Royal Society of Chemistry journal article supplement (doi:10.1039/d1em00426c), 2022-01-01
Supplement: d1em00426c1.xlsx [file d1em00426c1.xlsx]

## Sheet: ATR_-FTIR raw data
			wave number	Normal soil + plastics					Normal soil + Naddition+plastics					Sterile normal soil+plastics					Plastics
			[cm-1]	121	122	123	124	125	131	132	133	134	135	141	142	143	144	145	151	152	153	154	155
			649.904	73.6996	80.5185	74.5557	79.8462	76.03	72.0801	75.9501	74.7253	77.3029	83.0515	82.0176	82.114	77.8166	77.1339	82.9063	80.5146	81.1573	80.8226	82.3255	83.5457
Sample ID	Description		650.386	73.7601	80.3788	74.6022	79.6233	75.9984	72.2511	76.1292	74.8368	77.4015	82.9413	81.7731	82.0148	77.5486	77.0265	82.8766	80.284	80.781	80.4672	82.0416	83.3305
121	Normal soil + PBSA (PS treatment)		650.868	73.8266	80.2586	74.6181	79.4554	75.9754	72.4176	76.3652	74.9543	77.46	82.8494	81.5743	81.9676	77.368	76.9331	82.8625	80.162	80.4544	80.2003	81.7767	83.1793
122	Normal soil + PBSA (PS treatment)		651.35	73.8839	80.1613	74.5869	79.3467	75.9475	72.5664	76.6161	75.0449	77.4653	82.776	81.4692	81.9752	77.2682	76.8622	82.8552	80.1552	80.1974	80.0204	81.5534	83.1082
123	Normal soil + PBSA (PS treatment)		651.832	73.9222	80.0897	74.5138	79.2918	75.9113	72.7046	76.8505	75.1014	77.4173	82.729	81.4978	82.0405	77.238	76.8272	82.8546	80.2568	80.023	79.9113	81.3896	83.122
124	Normal soil + PBSA (PS treatment)		652.314	73.9408	80.0461	74.421	79.2777	75.872	72.8524	77.0547	75.1404	77.3243	82.7188	81.6808	82.1602	77.2619	76.8417	82.8654	80.4486	79.9353	79.8497	81.2941	83.2138
125	Normal soil + PBSA (PS treatment)		652.796	73.947	80.0324	74.34	79.2898	75.8408	73.0296	77.2316	75.1893	77.201	82.7522	82.0113	82.3223	77.3225	76.9141	82.8934	80.7061	79.9302	79.8161	81.2694	83.3688
131	Normal soil + Naddition+PBSA (PSN treatment)		653.279	73.9519	80.0532	74.2999	79.319	75.8304	73.2419	77.3949	75.2704	77.0677	82.8298	82.4553	82.5079	77.4043	77.0454	82.9431	81.0032	80.0004	79.8046	81.3156	83.5689
132	Normal soil + Naddition+PBSA (PSN treatment)		653.761	73.9662	80.1175	74.3203	79.3663	75.8523	73.4764	77.5593	75.3914	76.9502	82.9472	82.9599	82.6975	77.499	77.2308	83.0185	81.3162	80.1391	79.8257	81.4364	83.7974
133	Normal soil + Naddition+PBSA (PSN treatment)		654.243	73.9964	80.238	74.4084	79.4421	75.9157	73.707	77.7324	75.5443	76.8783	83.0998	83.4659	82.8786	77.6082	77.4629	83.1245	81.6252	80.3435	79.9023	81.6395	84.0414
134	Normal soil + Naddition+PBSA (PSN treatment)		654.725	74.0459	80.4264	74.5612	79.5614	76.0283	73.9072	77.9125	75.7142	76.8825	83.287	83.9199	83.0497	77.7421	77.7345	83.2675	81.9145	80.6132	80.0581	81.9344	84.2911
135	Normal soil + Naddition+PBSA (PSN treatment)		655.207	74.1153	80.6876	74.7692	79.7361	76.1959	74.0617	78.0897	75.8888	76.9878	83.5128	84.2839	83.2201	77.9156	78.0388	83.4538	82.1728	80.947	80.3063	82.3245	84.5387
141	Sterile normal soil+PBSA		655.689	74.2051	81.0132	75.0197	79.9693	76.4206	74.1724	78.2514	76.0658	77.2066	83.7834	84.5403	83.4042	78.1422	78.3677	83.6859	82.396	81.3391	80.6431	82.8001	84.7773
142	Sterile normal soil+PBSA		656.171	74.3148	81.38	75.2968	80.2533	76.6979	74.2545	78.3879	76.2514	77.5336	84.1009	84.6944	83.6143	78.4286	78.7088	83.9587	82.5895	81.778	81.0476	83.3352	85.002
143	Sterile normal soil+PBSA		656.653	74.4427	81.7538	75.5823	80.5731	77.0136	74.3266	78.4961	76.4532	77.9451	84.4589	84.772	83.8547	78.7729	79.0452	84.2579	82.7689	82.2486	81.49	83.8907	85.2125
144	Sterile normal soil+PBSA		657.135	74.5847	82.0996	75.8564	80.9128	77.344	74.3988	78.5805	76.6721	78.4039	84.8404	84.8122	84.1192	79.1655	79.3584	84.5631	82.9567	82.7365	81.9427	84.4238	85.4144
145	Sterile normal soil+PBSA		657.618	74.7362	82.392	76.101	81.2609	77.66	74.4674	78.6517	76.8967	78.869	85.2209	84.8578	84.3937	79.5923	79.6332	84.8522	83.1755	83.2314	82.3877	84.8988	85.6186
151	PBSA		658.1	74.8931	82.6226	76.304	81.6125	77.9331	74.516	78.7231	77.1059	79.3047	85.574	84.9428	84.6606	80.0374	79.8622	85.1076	83.4398	83.7268	82.8184	85.2946	85.8375
152	PBSA		658.582	75.055	82.8021	76.4634	81.967	78.1434	74.5261	78.8077	77.2767	79.6866	85.8791	85.0849	84.9032	80.4843	80.0486	85.32	83.7493	84.216	83.2338	85.6073	86.0804
153	PBSA		659.064	75.2244	82.9551	76.5882	82.3229	78.2854	74.4884	78.9163	77.394	80.0028	86.126	85.2811	85.1087	80.9166	80.2042	85.4894	84.088	84.6881	83.6319	85.8477	86.3498
154	PBSA		659.546	75.4054	83.1121	76.6968	82.6749	78.3708	74.4106	79.0551	77.458	80.2532	86.3179	85.5109	85.2699	81.3188	80.3454	85.6247	84.4288	85.1263	84.0047	86.0372	86.6402
155	PBSA		660.028	75.5983	83.3004	76.8103	83.014	78.4255	74.3166	79.2247	77.4841	80.4459	86.4693	85.7448	85.3852	81.6792	80.4867	85.74	84.7434	85.512	84.3417	86.2035	86.941
			660.51	75.7955	83.5368	76.9452	83.3309	78.4828	74.2381	79.42	77.4968	80.5948	86.6024	85.9559	85.4587	81.9938	80.6361	85.852	85.0117	85.8325	84.6365	86.3773	87.241
			660.992	75.9798	83.8239	77.1075	83.6213	78.5733	74.202	79.6302	77.52	80.7164	86.7396	86.129	85.499	82.2684	80.7929	85.976	85.2273	86.0882	84.8947	86.5877	87.5323
			661.475	76.1277	84.1512	77.2906	83.8869	78.7158	74.2212	79.8401	77.5682	80.8282	86.8975	86.2638	85.5186	82.5167	80.9493	86.1232	85.3966	86.2942	85.1354	86.8572	87.8108
			661.957	76.2157	84.4971	77.4787	84.1342	78.9124	74.2906	80.0324	77.6432	80.9455	87.0818	86.3717	85.5316	82.7556	81.094	86.2982	85.5332	86.4761	85.3852	87.1956	88.0743
			662.439	76.2291	84.834	77.6528	84.3689	79.1482	74.3912	80.1906	77.7367	81.0794	87.2868	86.4668	85.551	82.9975	81.2166	86.4974	85.6501	86.6606	85.6679	87.595	88.3185
			662.921	76.1684	85.1337	77.7979	84.5914	79.3963	74.4978	80.302	77.8359	81.2342	87.4966	86.5583	85.5859	83.2449	81.3113	86.7094	85.755	86.865	85.9926	88.0284	88.5351
			663.403	76.051	85.3734	77.9078	84.795	79.6266	74.5878	80.3605	77.9292	81.4064	87.6905	86.6456	85.6393	83.4901	81.3782	86.9179	85.8487	87.0922	86.3499	88.4555	88.7145
			663.885	75.9047	85.5405	77.9861	84.9683	79.8143	74.6471	80.3678	78.0096	81.5867	87.8496	86.7193	85.7075	83.719	81.4227	87.1057	85.9284	87.3315	86.7151	88.8345	88.8494
			664.367	75.7583	85.635	78.0432	85.1009	79.947	74.6711	80.3313	78.0747	81.7627	87.9617	86.7667	85.7821	83.9188	81.4527	87.2603	85.991	87.5656	87.06	89.1355	88.9402
			664.85	75.6325	85.6667	78.0908	85.1876	80.0242	74.6628	80.2607	78.1238	81.923	88.0231	86.7778	85.8528	84.0837	81.4766	87.3758	86.0363	87.7795	87.3633	89.347	88.9959
			665.332	75.5343	85.6509	78.1378	85.2299	80.0547	74.629	80.1643	78.1554	82.0593	88.0373	86.7489	85.9103	84.2172	81.501	87.4531	86.069	87.9659	87.6162	89.4762	89.0327
			665.814	75.4583	85.6035	78.1877	85.2361	80.0507	74.5786	80.0474	78.166	82.1662	88.0119	86.6838	85.9467	84.3295	81.5306	87.4962	86.099	88.1259	87.8216	89.5422	89.0706
			666.296	75.3892	85.5392	78.2378	85.2211	80.0249	74.5235	79.9139	78.1507	82.2404	87.958	86.5956	85.9567	84.4343	81.5685	87.5093	86.1422	88.2664	87.9875	89.5684	89.1293
			666.778	75.3085	85.4714	78.2804	85.2075	79.9881	74.481	79.7706	78.1085	82.2811	87.8905	86.508	85.937	84.5419	81.6161	87.4946	86.2197	88.3957	88.1201	89.5753	89.2236
			667.26	75.2039	85.4151	78.3046	85.2276	79.9503	74.4749	79.6357	78.0497	82.2916	87.8316	86.4576	85.8895	84.6527	81.6716	87.4527	86.3501	88.5168	88.2157	89.5744	89.3569
			667.742	75.0837	85.3882	78.3021	85.3175	79.9203	74.5251	79.5427	78.0023	82.2854	87.8091	86.4854	85.8257	84.7514	81.7272	87.3878	86.5354	88.6234	88.261	89.566	89.5128
			668.224	74.9825	85.4063	78.2756	85.4974	79.9047	74.6272	79.5285	78.0021	82.2866	87.8441	86.6132	85.7674	84.8154	81.7695	87.3153	86.7531	88.7039	88.2459	89.5453	89.6602
			668.707	74.9407	85.4724	78.2382	85.7522	79.9045	74.7429	79.6057	78.0656	82.3182	87.9336	86.8212	85.7357	84.8355	81.7868	87.2591	86.971	88.7535	88.1821	89.5153	89.7743
			669.189	74.9738	85.5751	78.2039	86.0405	79.9158	74.8254	79.7517	78.1749	82.3877	88.0525	87.0621	85.7383	84.8274	81.7768	87.2389	87.1669	88.7832	88.1023	89.4924	89.857
			669.671	75.0671	85.6972	78.1774	86.3238	79.933	74.85	79.9293	78.2955	82.4867	88.1743	87.2962	85.7686	84.8186	81.7458	87.2606	87.3326	88.8111	88.0375	89.4962	89.9283
			670.153	75.1956	85.8243	78.1557	86.5801	79.9524	74.8204	80.1102	78.4002	82.6011	88.285	87.5064	85.8161	84.8296	81.7029	87.3192	87.4665	88.8507	88.003	89.539	90.0069
			670.635	75.3388	85.9462	78.1349	86.799	79.9721	74.7556	80.2796	78.4767	82.7191	88.3824	87.6902	85.8724	84.8682	81.656	87.4052	87.5677	88.907	87.9999	89.6229	90.0999
			671.117	75.4834	86.0544	78.1136	86.9732	79.9907	74.6794	80.4313	78.524	82.8323	88.4701	87.8483	85.9324	84.9327	81.6119	87.5075	87.6349	88.978	88.0217	89.7411	90.2035
			671.599	75.6204	86.1418	78.094	87.0966	80.0064	74.6132	80.5619	78.5464	82.9348	88.5537	87.9783	85.9934	85.0153	81.5768	87.6142	87.669	89.057	88.06	89.8804	90.3077
			672.081	75.7421	86.204	78.0807	87.1662	80.0168	74.5724	80.6692	78.5497	83.0225	88.6387	88.0752	86.0544	85.1057	81.5561	87.7131	87.6754	89.1355	88.1075	90.024	90.4013
			672.563	75.8407	86.2415	78.0778	87.1864	80.0193	74.5623	80.752	78.5387	83.093	88.729	88.1339	86.1155	85.1939	81.5527	87.7933	87.6655	89.2051	88.1598	90.1548	90.4763
			673.046	75.9093	86.2618	78.0862	87.1719	80.0115	74.5767	80.8119	78.5156	83.1459	88.826	88.1534	86.1792	85.2727	81.5654	87.8478	87.6538	89.2601	88.2161	90.2602	90.5307
			673.528	75.9436	86.2779	78.1016	87.1442	79.9923	74.6005	80.854	78.4804	83.1819	88.9277	88.1386	86.2492	85.3389	81.5878	87.8756	87.653	89.2986	88.278	90.3358	90.5691
			674.01	75.9433	86.3049	78.1155	87.1255	79.9634	74.6169	80.8852	78.4327	83.2016	89.0296	88.0995	86.3293	85.3926	81.6091	87.8816	87.6696	89.3226	88.3472	90.3853	90.5986
			674.492	75.9124	86.3544	78.1184	87.1295	79.929	74.615	80.9116	78.3743	83.2052	89.1252	88.047	86.4209	85.4359	81.6171	87.8733	87.7032	89.3365	88.424	90.418	90.6243
			674.974	75.8575	86.4306	78.1037	87.1582	79.8957	74.5948	80.935	78.3107	83.1919	89.2082	87.99	86.521	85.4707	81.6016	87.8582	87.7486	89.3458	88.5069	90.4442	90.6464
			675.456	75.7855	86.5293	78.0705	87.2023	79.8706	74.5661	80.9513	78.2502	83.162	89.2742	87.9329	86.6214	85.4987	81.5577	87.8411	87.8006	89.3563	88.5933	90.4717	90.6608
			675.938	75.7023	86.6398	78.0241	87.2476	79.8601	74.5434	80.9515	78.2009	83.118	89.322	87.8768	86.7102	85.5224	81.4877	87.8233	87.8575	89.3735	88.6822	90.5043	90.6625
			676.42	75.613	86.7485	77.9732	87.2818	79.8667	74.5384	80.9253	78.1673	83.0661	89.3537	87.8219	86.7747	85.5453	81.401	87.8041	87.9218	89.4024	88.7742	90.5424	90.6506
			676.903	75.5222	86.8423	77.9268	87.2997	79.8885	74.5557	80.8662	78.1479	83.0145	89.3735	87.7702	86.8058	85.5721	81.3124	87.7828	87.9966	89.446	88.8705	90.5837	90.6301
			677.385	75.4355	86.9118	77.8898	87.3032	79.9187	74.592	80.7745	78.1365	82.9715	89.3862	87.7262	86.8007	85.6064	81.2387	87.7601	88.0809	89.5041	88.97	90.6241	90.6108
			677.867	75.3602	86.9522	77.8623	87.2982	79.9479	74.6414	80.6589	78.1261	82.9428	89.3954	87.6957	86.7636	85.6483	81.1948	87.7389	88.1663	89.5732	89.0671	90.6582	90.603
			678.349	75.3042	86.9629	77.8402	87.2897	79.9669	74.7002	80.5343	78.1141	82.9301	89.4033	87.6842	86.703	85.6933	81.1906	87.7231	88.2372	89.648	89.1513	90.6801	90.6133
			678.831	75.2731	86.9467	77.8188	87.2791	79.9694	74.7709	80.4171	78.1043	82.9324	89.4114	87.6945	86.6289	85.7332	81.2287	87.7169	88.2763	89.7237	89.2108	90.685	90.6421
			679.313	75.2673	86.911	77.7949	87.2646	79.9533	74.8604	80.321	78.1065	82.9479	89.422	87.7257	86.5501	85.7603	81.3036	87.723	88.272	89.799	89.2378	90.6715	90.6851
			679.795	75.2801	86.8671	77.7688	87.2454	79.921	74.975	80.2541	78.1309	82.9765	89.4397	87.7732	86.4731	85.7711	81.4009	87.7417	88.2258	89.8773	89.2335	90.6443	90.7365
			680.278	75.2982	86.8299	77.7433	87.2245	79.8778	75.1141	80.2178	78.1825	83.0207	89.4702	87.8305	86.4025	85.7693	81.4997	87.7708	88.154	89.9651	89.2102	90.6139	90.793
			680.76	75.3061	86.8149	77.7217	87.2101	79.8293	75.2665	80.2085	78.256	83.083	89.5183	87.8905	86.3423	85.7644	81.5762	87.8048	88.0831	90.0673	89.1866	90.5944	90.8552
			681.242	75.2919	86.8339	77.7052	87.2126	79.7797	75.4117	80.221	78.3361	83.1633	89.585	87.9467	86.2962	85.7675	81.6088	87.8367	88.0395	90.1825	89.1805	90.5979	90.927
			681.724	75.2525	86.8904	77.6923	87.2395	79.7307	75.5271	80.2517	78.4026	83.2554	89.6653	87.9936	86.2677	85.7844	81.5838	87.859	88.0401	90.3004	89.2004	90.6302	91.0109
			682.206	75.1942	86.978	77.6788	87.291	79.6823	75.5949	80.2992	78.4376	83.3464	89.7485	88.0267	86.259	85.8127	81.4993	87.8659	88.0859	90.4037	89.2416	90.6873	91.105
			682.688	75.1296	87.0817	77.6598	87.3584	79.6342	75.6089	80.3631	78.4322	83.4195	89.8217	88.0418	86.2687	85.8409	81.3664	87.8554	88.1625	90.4744	89.2889	90.7571	91.2015
			683.17	75.071	87.1821	77.6319	87.4272	79.5872	75.5754	80.4403	78.3894	83.4588	89.8733	88.0366	86.2909	85.8541	81.2077	87.8312	88.246	90.5023	89.3243	90.8236	91.2886
			683.652	75.0238	87.2611	77.5948	87.4827	79.5439	75.5107	80.5227	78.3223	83.4563	89.8986	88.0116	86.3154	85.8404	81.0523	87.8031	88.3127	90.4918	89.3365	90.8729	91.3554
			684.135	74.9832	87.3071	77.5512	87.5161	79.5075	75.4347	80.5965	78.2492	83.4162	89.9009	87.9711	86.3301	85.7977	80.9289	87.7854	88.3479	90.4623	89.3271	90.8978	91.3964
			684.617	74.9355	87.3181	77.5059	87.5279	79.4808	75.3648	80.6451	78.1865	83.3548	89.8912	87.9231	86.3247	85.7357	80.8578	87.7932	88.3507	90.4423	89.3106	90.8998	91.4142
			685.099	74.8642	87.3004	77.4646	87.5261	79.4649	75.3109	80.6549	78.1439	83.2955	89.8831	87.878	86.2948	85.6727	80.8467	87.8374	88.3322	90.4574	89.3073	90.8872	91.4182
			685.581	74.7586	87.2646	77.4321	87.5217	79.4589	75.2754	80.6191	78.1234	83.2607	89.8874	87.8452	86.2436	85.6283	80.889	87.9204	88.3098	90.5194	89.3344	90.8707	91.4189
			686.063	74.6188	87.2207	77.4119	87.5225	79.4608	75.2558	80.5409	78.1212	83.2646	89.9077	87.8313	86.181	85.6167	80.968	88.035	88.2997	90.6208	89.3977	90.8599	91.4231
			686.545	74.4569	87.1762	77.4059	87.5294	79.4687	75.2481	80.4319	78.1317	83.3088	89.9399	87.8391	86.1209	85.6422	81.0621	88.1651	88.3109	90.7368	89.4899	90.8618	91.4311
			687.027	74.2933	87.1351	77.4134	87.5373	79.4811	75.2486	80.3091	78.1503	83.3832	89.9739	87.868	86.0763	85.6996	81.1502	88.29	88.3432	90.835	89.5943	90.8816	91.4365
			687.509	74.1492	87.1003	77.431	87.5391	79.4971	75.2542	80.1896	78.1747	83.4693	89.9982	87.9149	86.056	85.7771	81.2151	88.3887	88.3877	90.8869	89.6916	90.9238	91.4312
			687.991	74.0395	87.0756	77.4515	87.5303	79.5152	75.2612	80.0864	78.2035	83.5472	90.0047	87.9758	86.0615	85.8611	81.2461	88.4461	88.4311	90.8794	89.768	90.9926	91.4095
			688.474	73.9676	87.0654	77.4645	87.5133	79.5323	75.2645	80.0058	78.2348	83.6013	89.9912	88.0463	86.0868	85.94	81.238	88.4561	88.4592	90.8183	89.8187	91.0892	91.372
			688.956	73.9265	87.0731	77.4578	87.4957	79.5431	75.2583	79.9478	78.2656	83.6233	89.9616	88.1209	86.1208	86.0057	81.1901	88.4214	88.4617	90.7241	89.8465	91.2085	91.3256
			689.438	73.903	87.0983	77.4211	87.4878	79.5412	75.2386	79.9087	78.2922	83.6125	89.9234	88.1923	86.1506	86.0524	81.1039	88.3513	88.4339	90.622	89.8577	91.337	91.2796
			689.92	73.8838	87.1347	77.3491	87.4967	79.5208	75.2055	79.8842	78.312	83.5721	89.8839	88.2515	86.1655	86.0745	80.9827	88.2569	88.3772	90.5315	89.8567	91.4535	91.2417
			690.402	73.8593	87.1708	77.2436	87.5235	79.4791	75.165	79.871	78.3249	83.5067	89.8489	88.2885	86.1587	86.0668	80.832	88.1481	88.2986	90.4618	89.8449	91.5348	91.2147
			690.884	73.8244	87.1929	77.1142	87.5639	79.4178	75.127	79.8675	78.3335	83.4203	89.8216	88.2947	86.1286	86.0257	80.6607	88.0329	88.2093	90.4125	89.8228	91.5625	91.1963
			691.366	73.7767	87.1896	76.976	87.6103	79.3432	75.1027	79.8717	78.3411	83.317	89.8042	88.2668	86.0777	85.9534	80.4824	87.9175	88.1221	90.3789	89.794	91.5303	91.1822
			691.848	73.7143	87.1562	76.8466	87.6567	79.2645	75.0997	79.8809	78.3499	83.2022	89.7989	88.2083	86.0111	85.8595	80.3144	87.8081	88.0487	90.3576	89.7675	91.4473	91.1685
			692.331	73.6354	87.0963	76.7412	87.701	79.1919	75.1196	79.8911	78.3585	83.084	89.8088	88.1304	85.9357	85.7613	80.1745	87.7107	87.997	90.3491	89.7563	91.3351	91.155
			692.813	73.5412	87.0199	76.67	87.7451	79.1333	75.1572	79.8984	78.3631	82.9724	89.8361	88.0485	85.8584	85.6786	80.0773	87.6304	87.9691	90.3561	89.7717	91.2204	91.1444
			693.295	73.4381	86.94	76.6369	87.7933	79.0939	75.2028	79.9014	78.3586	82.8781	89.8811	87.9782	85.7859	85.6283	80.0311	87.5702	87.9612	90.3798	89.8174	91.1254	91.1401
			693.777	73.3404	86.8677	76.6409	87.8485	79.0752	75.2464	79.9024	78.3427	82.809	89.9403	87.9302	85.7241	85.6179	80.0359	87.5296	87.966	90.4166	89.8853	91.0608	91.1431
			694.259	73.2685	86.8096	76.6784	87.91	79.0765	75.2802	79.9069	78.3177	82.7692	90.0065	87.9084	85.6784	85.6435	80.0841	87.5044	87.9756	90.4578	89.9576	91.0251	91.1503
			694.741	73.2442	86.7681	76.7455	87.9739	79.096	75.3008	79.9215	78.2915	82.7578	90.0697	87.9094	85.653	85.6913	80.1629	87.4887	87.9838	90.4929	90.013	91.0077	91.1552
			695.223	73.2833	86.7429	76.8386	88.034	79.131	75.3083	79.9509	78.2748	82.77	90.1196	87.9249	85.6508	85.7434	80.2575	87.4763	87.9887	90.514	90.0351	90.9958	91.1501
			695.705	73.3893	86.7331	76.9539	88.0847	79.1787	75.3053	79.9953	78.2774	82.7993	90.1482	87.9461	85.6728	85.7834	80.3538	87.4632	87.9909	90.5199	90.0188	90.9802	91.1305
			696.188	73.5518	86.7387	77.0865	88.1221	79.2356	75.2948	80.0501	78.3035	82.8398	90.1509	87.966	85.7178	85.8019	80.4417	87.4478	87.9926	90.5155	89.9717	90.9582	91.0971
			696.67	73.7498	86.76	77.2294	88.1436	79.298	75.2802	80.1081	78.3505	82.8873	90.1271	87.9814	85.7823	85.7973	80.516	87.4305	87.9946	90.5085	89.9083	90.9309	91.0558
			697.152	73.9591	86.7959	77.3741	88.1468	79.3625	75.2655	80.1626	78.4097	82.94	90.0789	87.9923	85.8607	85.7735	80.5761	87.4119	87.9954	90.5029	89.842	90.9	91.0156
			697.634	74.1603	86.8427	77.5121	88.1279	79.4269	75.2564	80.2109	78.4703	82.9973	90.01	88	85.9462	85.7363	80.6256	87.3918	87.9919	90.4962	89.7784	90.8637	90.985
			698.116	74.3435	86.8941	77.6366	88.0827	79.4911	75.2607	80.255	78.5236	83.0587	89.9251	88.005	86.0318	85.6899	80.6703	87.3688	87.982	90.4789	89.7134	90.8168	90.9684
			698.598	74.5086	86.943	77.7446	88.0089	79.557	75.2868	80.3004	78.5664	83.1224	89.8303	88.0067	86.1103	85.6366	80.7175	87.3419	87.9664	90.4403	89.6379	90.754	90.9653
			699.08	74.6612	86.9846	77.8373	87.9099	79.6278	75.3415	80.3531	78.6014	83.1853	89.7333	88.0035	86.1762	85.5787	80.7742	87.3126	87.9502	90.3751	89.5454	90.6746	90.9711
			699.562	74.808	87.0183	77.9194	87.7963	79.7063	75.4274	80.4153	78.6352	83.2439	89.6428	87.9942	86.2264	85.5204	80.8465	87.2861	87.9412	90.2879	89.4382	90.5858	90.979
			700.045	74.9531	87.0481	77.9973	87.6848	79.7935	75.5417	80.4845	78.6751	83.295	89.5681	87.9799	86.2609	85.4694	80.938	87.2714	87.9466	90.1934	89.3293	90.5015	90.9834
			700.527	75.0977	87.0807	78.0765	87.5939	79.8879	75.6773	80.5534	78.726	83.337	89.5162	87.9638	86.2838	85.4357	81.0493	87.2789	87.9699	90.111	89.2374	90.4371	90.9812
			701.009	75.2414	87.1215	78.1605	87.538	79.9864	75.8251	80.6129	78.7888	83.3705	89.4905	87.951	86.302	85.4288	81.1783	87.3171	88.0088	90.0561	89.1791	90.4035	90.9725
			701.491	75.3857	87.1724	78.2498	87.5225	80.0854	75.9768	80.6561	78.861	83.3983	89.4904	87.9472	86.3238	85.4542	81.3197	87.39	88.056	90.034	89.1612	90.4023	90.9604
			701.973	75.5347	87.2309	78.3433	87.5431	80.183	76.1262	80.6805	78.9386	83.4251	89.5124	87.9568	86.3575	85.5118	81.467	87.4952	88.1018	90.0381	89.178	90.4257	90.9495
			702.455	75.6939	87.2915	78.4397	87.5879	80.2793	76.2691	80.6891	79.018	83.4569	89.5517	87.9824	86.409	85.5956	81.6129	87.6243	88.1381	90.0532	89.2141	90.4601	90.9451
			702.937	75.8672	87.35	78.5389	87.642	80.3768	76.4026	80.6897	79.0975	83.4999	89.6042	88.0237	86.4806	85.696	81.7519	87.7653	88.1609	90.0636	89.2515	90.4931	90.9518
			703.419	76.0535	87.4058	78.6433	87.693	80.4784	76.5233	80.6914	79.1772	83.5596	89.6673	88.0776	86.5702	85.803	81.8813	87.9056	88.1715	90.0599	89.2771	90.5181	90.9721
			703.902	76.245	87.4627	78.7567	87.7345	80.5859	76.6275	80.7026	79.2582	83.6389	89.7397	88.1383	86.6723	85.9077	82.0019	88.0349	88.1745	90.0431	89.2876	90.537	91.005
			704.384	76.4291	87.5265	78.8837	87.7657	80.6981	76.7128	80.7284	79.3414	83.7378	89.8188	88.198	86.7793	86.0041	82.1178	88.1464	88.1747	90.0232	89.2889	90.5572	91.0446
			704.866	76.5925	87.6006	79.0268	87.7893	80.8109	76.7792	80.7702	79.4266	83.8519	89.8996	88.2475	86.8834	86.0874	82.234	88.2368	88.1749	90.0126	89.291	90.5866	91.0811
			705.348	76.7255	87.682	79.1848	87.8073	80.9189	76.8309	80.8263	79.5126	83.9741	89.9733	88.2785	86.9785	86.1529	82.355	88.3043	88.1753	90.0192	89.3011	90.6279	91.1023
			705.83	76.8252	87.7608	79.3516	87.8193	81.0174	76.8758	80.8938	79.5968	84.0953	90.0292	88.2848	87.061	86.1954	82.4824	88.3478	88.1749	90.042	89.3194	90.6766	91.0974
			706.312	76.8956	87.8229	79.5168	87.8228	81.1043	76.923	80.9694	79.6767	84.206	90.0571	88.2657	87.13	86.2109	82.6137	88.3667	88.1737	90.071	89.3391	90.7228	91.0611
			706.794	76.9454	87.8558	79.667	87.8158	81.1813	76.9801	81.0504	79.7494	84.2986	90.0516	88.2266	87.1871	86.1988	82.7427	88.3612	88.1745	90.0921	89.3507	90.7554	90.9967
			707.276	76.9841	87.8552	79.7893	87.7991	81.2519	77.0493	81.1347	79.8126	84.3685	90.0139	88.1791	87.2353	86.1646	82.8611	88.3345	88.1827	90.0933	89.3468	90.7673	90.9164
			707.759	77.0196	87.8273	79.8741	87.7777	81.32	77.1274	81.2207	79.864	84.4137	89.9524	88.1385	87.279	86.1198	82.9604	88.2927	88.2033	90.0696	89.3257	90.7569	90.8385
			708.241	77.0562	87.7875	79.9176	87.7593	81.3869	77.2065	81.3077	79.9019	84.4348	89.8793	88.119	87.3218	86.0793	83.0341	88.244	88.2385	90.0242	89.2918	90.7274	90.7808
			708.723	77.0959	87.754	79.9227	87.7503	81.4506	77.2778	81.3957	79.9258	84.4336	89.8069	88.1297	87.3669	86.0566	83.0788	88.1972	88.2856	89.9651	89.2521	90.6832	90.7555
			709.205	77.1397	87.7408	79.8981	87.7534	81.5063	77.3354	81.4852	79.9366	84.4134	89.7436	88.1714	87.4155	86.0598	83.0951	88.1589	88.3371	89.9013	89.2127	90.6273	90.7649
			709.687	77.1885	87.7524	79.8568	87.7656	81.5492	77.3785	81.5769	79.9371	84.3786	89.6931	88.2368	87.4665	86.0889	83.0871	88.133	88.3832	89.8392	89.1768	90.5606	90.8019
			710.169	77.2438	87.782	79.8133	87.7806	81.5772	77.4115	81.6705	79.9322	84.3357	89.6545	88.313	87.5166	86.1365	83.0616	88.1199	88.4152	89.7813	89.1454	90.4845	90.8521
			710.651	77.3058	87.8158	79.7809	87.7912	81.5925	77.4413	81.7645	79.9278	84.2932	89.6249	88.3856	87.5601	86.1914	83.0277	88.1184	88.4281	89.7278	89.1198	90.4043	90.9002
			711.133	77.3727	87.8385	79.7696	87.7938	81.6021	77.4747	81.8551	79.93	84.2603	89.6019	88.4432	87.5901	86.2425	82.9951	88.127	88.4221	89.6782	89.1044	90.3304	90.934
			711.615	77.44	87.8405	79.784	87.7891	81.6146	77.5152	81.9373	79.9431	84.2445	89.5846	88.4801	87.5996	86.2825	82.9728	88.1451	88.4006	89.633	89.1063	90.277	90.9479
			712.098	77.5019	87.8207	79.8234	87.7815	81.6367	77.5617	82.0054	79.969	84.2489	89.5733	88.4967	87.5834	86.3089	82.967	88.1732	88.3678	89.5932	89.1321	90.2563	90.9426
			712.58	77.5532	87.7861	79.882	87.7751	81.6696	77.6103	82.0554	80.0072	84.2705	89.5675	88.4973	87.5392	86.3232	82.9806	88.2113	88.3266	89.5586	89.1835	90.2728	90.9223
			713.062	77.592	87.7479	79.9512	87.7712	81.7083	77.6554	82.0855	80.0551	84.301	89.5653	88.4866	87.4693	86.3281	83.0119	88.2581	88.2781	89.5269	89.2535	90.3196	90.8916
			713.544	77.6195	87.7158	80.0216	87.7662	81.7427	77.6928	82.0969	80.1091	84.3297	89.5626	88.4672	87.3801	86.3261	83.0554	88.3101	88.223	89.4943	89.3267	90.3792	90.8535
			714.026	77.6402	87.6947	80.0848	87.7538	81.7611	77.7205	82.0932	80.1663	84.3476	89.5542	88.4392	87.2823	86.3185	83.1029	88.362	88.164	89.4577	89.3837	90.4297	90.809
			714.508	77.6588	87.6837	80.1351	87.7287	81.7552	77.7388	82.0798	80.224	84.3513	89.5367	88.4014	87.1891	86.307	83.145	88.4079	88.1067	89.4175	89.4079	90.4524	90.7587
			714.99	77.6785	87.6783	80.1704	87.6898	81.7225	77.7493	82.0619	80.2803	84.3448	89.5099	88.3539	87.1137	86.2947	83.1739	88.4438	88.0589	89.3797	89.3926	90.4389	90.705
			715.472	77.6995	87.6731	80.1916	87.6421	81.668	77.7542	82.0438	80.3337	84.3375	89.477	88.2996	87.0666	86.2867	83.1852	88.4686	88.0275	89.3543	89.343	90.3939	90.6518
			715.955	77.7195	87.6652	80.2024	87.5944	81.6014	77.7549	82.028	80.3819	84.3401	89.4437	88.2448	87.0532	86.2884	83.1788	88.4841	88.0152	89.3513	89.2738	90.3308	90.604
			716.437	77.7353	87.6546	80.2074	87.555	81.5345	77.7531	82.0159	80.4224	84.3605	89.415	88.1979	87.073	86.3031	83.1593	88.4935	88.0192	89.3755	89.2022	90.2653	90.5657
			716.919	77.7454	87.6432	80.2107	87.5277	81.4771	77.7504	82.0075	80.4515	84.3995	89.3937	88.1666	87.1201	86.3291	83.1342	88.4995	88.0316	89.4231	89.1395	90.2072	90.5379
			717.401	77.7502	87.6328	80.2145	87.5094	81.4354	77.7493	82.0027	80.4657	84.4513	89.3786	88.1565	87.1847	86.3591	83.1123	88.502	88.0429	89.4817	89.0878	90.1574	90.519
			717.883	77.7523	87.6231	80.2191	87.4922	81.4116	77.752	82.0013	80.462	84.5054	89.3661	88.1687	87.2552	86.3818	83.1014	88.4984	88.0457	89.5337	89.0396	90.1093	90.5055
			718.365	77.7539	87.6121	80.2219	87.4677	81.4047	77.7603	82.0031	80.4387	84.5505	89.3519	88.2004	87.3207	86.3849	83.1056	88.4839	88.0383	89.5624	88.983	90.0537	90.4948
			718.847	77.7554	87.5966	80.2188	87.4321	81.4124	77.7734	82.0072	80.3966	84.5784	89.3332	88.2453	87.3719	86.3597	83.1238	88.4536	88.0243	89.5582	88.9084	89.9851	90.4866
			719.33	77.7542	87.574	80.2051	87.3891	81.432	77.7886	82.0125	80.3391	84.5856	89.31	88.2949	87.4032	86.3046	83.1493	88.405	88.0103	89.5215	88.814	89.9059	90.483
			719.812	77.745	87.5437	80.1776	87.3494	81.4608	77.8013	82.0176	80.2723	84.5732	89.2844	88.34	87.4124	86.2252	83.1712	88.3388	88.0019	89.4615	88.7069	89.8247	90.4877
			720.294	77.722	87.5075	80.1366	87.3261	81.4965	77.8071	82.0211	80.2039	84.5443	89.2587	88.3722	87.4004	86.1325	83.1773	88.2601	87.9992	89.3914	88.5995	89.7525	90.5028
			720.776	77.6815	87.4681	80.086	87.3282	81.5366	77.8037	82.0223	80.1421	84.5014	89.234	88.3854	87.3711	86.0385	83.1579	88.1765	87.997	89.3223	88.5043	89.6967	90.5267
			721.258	77.6234	87.4283	80.0338	87.3565	81.5785	77.7922	82.0213	80.0935	84.4454	89.2089	88.3767	87.3299	85.9527	83.1099	88.0972	87.9871	89.2594	88.4285	89.6576	90.5543
			721.74	77.5514	87.3891	79.9898	87.4022	81.6198	77.7767	82.0189	80.0629	84.3768	89.1805	88.3469	87.2833	85.8799	83.0374	88.0312	87.9627	89.2017	88.3723	89.6291	90.5787
			722.222	77.4715	87.3504	79.9626	87.4509	81.6584	77.7629	82.0165	80.0517	84.2976	89.1468	88.3012	87.238	85.8205	82.9515	87.9852	87.9219	89.1453	88.3311	89.6028	90.5935
			722.704	77.3902	87.311	79.9568	87.488	81.6923	77.7567	82.015	80.0589	84.2134	89.1077	88.2476	87.1994	85.7726	82.8669	87.9627	87.8692	89.087	88.299	89.5728	90.596
			723.187	77.3132	87.2698	79.9705	87.5033	81.72	77.7629	82.0155	80.082	84.1331	89.0665	88.1958	87.1711	85.7335	82.7979	87.9629	87.813	89.0271	88.272	89.5384	90.5867
			723.669	77.2444	87.2258	79.9954	87.4935	81.739	77.7843	82.0186	80.118	84.0667	89.028	88.1536	87.1534	85.7006	82.7541	87.9801	87.7619	88.9691	88.2488	89.5029	90.5684
			724.151	77.1871	87.1785	80.0178	87.4612	81.7465	77.822	82.0247	80.165	84.022	88.9967	88.1255	87.1437	85.6719	82.7381	88.0045	87.7207	88.9166	88.2299	89.4707	90.5428
			724.633	77.1438	87.127	80.0231	87.4113	81.7392	77.8758	82.0343	80.2221	84.0012	88.9743	88.1107	87.1365	85.6449	82.7456	88.0231	87.6888	88.8713	88.2147	89.4423	90.5091
			725.115	77.1163	87.0699	79.9992	87.3481	81.7146	77.9437	82.0474	80.2888	84.0001	88.9586	88.104	87.1258	85.6165	82.7669	88.0232	87.6607	88.8307	88.1997	89.4129	90.4633
			725.597	77.1047	87.0058	79.941	87.2732	81.6723	78.0214	82.064	80.3642	84.0087	88.944	88.0974	87.106	85.583	82.7904	87.9952	87.6299	88.7893	88.179	89.3732	90.4007
			726.079	77.1063	86.9339	79.8519	87.1865	81.6147	78.1016	82.0832	80.4451	84.0149	88.9235	88.0834	87.0747	85.5414	82.8051	87.9354	87.5914	88.7409	88.1462	89.3136	90.319
			726.561	77.1153	86.8552	79.7434	87.088	81.5467	78.1744	82.1032	80.5254	84.0083	88.8913	88.0572	87.033	85.4899	82.8033	87.8469	87.544	88.682	88.0971	89.2292	90.2207
			727.043	77.1235	86.7729	79.6318	86.9797	81.4744	78.2291	82.1221	80.597	83.9832	88.8449	88.018	86.9845	85.4282	82.7807	87.7388	87.4896	88.6125	88.0314	89.1226	90.1139
			727.526	77.1228	86.6911	79.5328	86.8671	81.4025	78.2565	82.137	80.6511	83.9387	88.7851	87.968	86.9342	85.3573	82.7362	87.6223	87.4306	88.5352	87.9521	89.0028	90.0098
			728.008	77.1076	86.614	79.4572	86.7574	81.3333	78.2524	82.1453	80.6803	83.8775	88.7154	87.9106	86.886	85.2782	82.6706	87.5067	87.3674	88.4528	87.8632	88.8823	89.9183
			728.49	77.0762	86.5439	79.4085	86.6576	81.2656	78.219	82.1442	80.6807	83.8036	88.6398	87.848	86.8414	85.1915	82.5852	87.3966	87.2972	88.3657	87.767	88.7712	89.8444
			728.972	77.0311	86.4805	79.382	86.5723	81.1964	78.1646	82.1308	80.6524	83.7195	88.5614	87.7808	86.7994	85.0973	82.4827	87.2916	87.2149	88.271	87.6627	88.6744	89.7861
			729.454	76.9767	86.4204	79.3675	86.5024	81.1231	78.1013	82.1025	80.5991	83.6266	88.4817	87.7079	86.7576	84.9967	82.3678	87.188	87.1159	88.1642	87.547	88.59	89.7348
			729.936	76.9171	86.3589	79.3522	86.4454	81.0451	78.0416	82.0568	80.5271	83.5258	88.4016	87.6279	86.7138	84.8926	82.2474	87.0818	86.9987	88.042	87.4171	88.5116	89.679
			730.418	76.8542	86.2916	79.3246	86.3968	80.9654	77.9943	81.9933	80.4431	83.4186	88.3218	87.5413	86.6668	84.7901	82.1303	86.9726	86.8662	87.9058	87.2732	88.4313	89.6074
			730.9	76.7872	86.2155	79.2773	86.3513	80.8892	77.9628	81.914	80.3529	83.3084	88.2439	87.4501	86.6173	84.6948	82.0254	86.8645	86.7249	87.7617	87.1195	88.3432	89.5136
			731.383	76.7147	86.1298	79.208	86.3043	80.8215	77.9455	81.8241	80.2612	83.1996	88.1707	87.3579	86.5664	84.6105	81.939	86.7658	86.5822	87.6192	86.9638	88.244	89.3962
			731.865	76.6367	86.0359	79.1188	86.2517	80.7652	77.9375	81.7318	80.1715	83.0966	88.1052	87.2678	86.5143	84.5367	81.8726	86.6857	86.4441	87.4875	86.8146	88.1332	89.2587
			732.347	76.5565	85.9359	79.0154	86.1896	80.7187	77.9345	81.6469	80.0872	83.0018	88.0499	87.1812	86.4591	84.4679	81.8224	86.6312	86.3142	87.3724	86.6781	88.0114	89.1075
			732.829	76.481	85.8327	78.9044	86.1144	80.6767	77.934	81.5787	80.0121	82.9144	88.0065	87.0973	86.397	84.3943	81.7797	86.6047	86.1937	87.2746	86.5566	87.8797	88.9501
			733.311	76.4177	85.7293	78.7924	86.024	80.6314	77.9363	81.5333	79.95	82.8313	87.9747	87.0146	86.3231	84.306	81.7344	86.6025	86.0842	87.191	86.4484	87.7402	88.7941
			733.793	76.3718	85.6291	78.6849	85.9188	80.576	77.9425	81.5114	79.9038	82.7478	87.9532	86.9322	86.2347	84.1965	81.6771	86.6162	85.9882	87.1165	86.3496	87.5967	88.6475
			734.275	76.3432	85.536	78.5859	85.803	80.5067	77.9531	81.5087	79.8739	82.6599	87.9394	86.8518	86.1325	84.0661	81.6026	86.6349	85.9102	87.0472	86.2563	87.4557	88.5179
			734.758	76.3264	85.4539	78.4982	85.6847	80.4241	77.966	81.5161	79.8578	82.5658	87.9301	86.7778	86.0224	83.9227	81.5104	86.6472	85.8545	86.9807	86.1658	87.3251	88.4123
			735.24	76.3124	85.3857	78.4232	85.5739	80.3329	77.9765	81.5235	79.8502	82.4658	87.9208	86.7166	85.9139	83.7788	81.4043	86.6443	85.8235	86.916	86.0765	87.2124	88.3351
			735.722	76.2927	85.3317	78.361	85.4799	80.2403	77.9794	81.5226	79.8449	82.362	87.9066	86.6739	85.8178	83.6479	81.2905	86.6202	85.8154	86.8512	85.9879	87.1217	88.2868
			736.204	76.2629	85.2895	78.3109	85.4083	80.1535	77.971	81.5092	79.8368	82.2575	87.8819	86.6523	85.7425	83.5394	81.1756	86.5723	85.8235	86.7823	85.8992	87.0517	88.2624
			736.686	76.2237	85.2531	78.2711	85.3589	80.0783	77.9504	81.4836	79.8235	82.1547	87.8417	86.6494	85.6919	83.4561	81.0652	86.5015	85.838	86.7036	85.8097	86.9961	88.2527
			737.168	76.1797	85.2154	78.2379	85.3261	80.018	77.9204	81.4498	79.8062	82.0558	87.7828	86.6582	85.6632	83.3938	80.9631	86.4113	85.8481	86.6098	85.7197	86.9454	88.2458
			737.65	76.1352	85.1697	78.2062	85.3004	79.9733	77.8855	81.4127	79.7882	81.9623	87.7051	86.6682	85.6481	83.3437	80.8716	86.3084	85.8456	86.4993	85.6313	86.8907	88.2301
			738.132	76.0909	85.1119	78.17	85.2719	79.943	77.8508	81.3756	79.7738	81.8753	87.6123	86.6679	85.6349	83.295	80.7918	86.2011	85.8256	86.376	85.5486	86.8261	88.1976
			738.615	76.0419	85.0421	78.1228	85.2325	79.924	77.82	81.3392	79.766	81.796	87.511	86.648	85.6121	83.2387	80.7237	86.0986	85.7872	86.2495	85.4762	86.7498	88.1451
			739.097	75.9795	84.9638	78.0596	85.1778	79.9119	77.7947	81.3015	79.7651	81.7245	87.4094	86.6028	85.5713	83.169	80.6663	86.0084	85.7317	86.132	85.4166	86.6634	88.0738
			739.579	75.8946	84.8822	77.9781	85.1081	79.9017	77.7757	81.2595	79.7697	81.66	87.315	86.5317	85.5091	83.0837	80.6177	85.9345	85.6608	86.0339	85.3682	86.5691	87.9878
			740.061	75.7825	84.8029	77.8799	85.0266	79.8879	77.7636	81.2113	79.7766	81.6004	87.2334	86.4385	85.4279	82.9832	80.575	85.8762	85.5761	85.96	85.3243	86.4683	87.8918
			740.543	75.6461	84.7287	77.7703	84.9388	79.866	77.7601	81.1575	79.7832	81.5429	87.1672	86.3312	85.3347	82.8701	80.5349	85.8282	85.4796	85.9079	85.2753	86.3617	87.7899
			741.025	75.4953	84.6606	77.6569	84.8505	79.8329	77.7666	81.1018	79.7882	81.4844	87.1165	86.2203	85.2391	82.7476	80.4945	85.7825	85.3746	85.8695	85.2124	86.25	87.6853
			741.507	75.3439	84.5969	77.5482	84.7672	79.7878	77.7839	81.0501	79.7914	81.4234	87.0799	86.118	85.1509	82.6199	80.4516	85.7314	85.2663	85.8339	85.1315	86.1362	87.5813
			741.989	75.2055	84.5357	77.4502	84.6927	79.7327	77.8096	81.0082	79.7941	81.3601	87.0551	86.0352	85.0781	82.4911	80.4056	85.6708	85.1611	85.7918	85.0355	86.0266	87.4823
			742.471	75.0887	84.475	77.365	84.6285	79.671	77.8382	80.9799	79.7971	81.2965	87.0388	85.9799	85.0254	82.3651	80.357	85.6016	85.065	85.7378	84.933	85.9293	87.3936
			742.954	74.9962	84.4143	77.29	84.5728	79.6061	77.862	80.9657	79.8002	81.2352	87.027	85.9547	84.9932	82.2448	80.3065	85.5299	84.9805	85.6703	84.8348	85.8512	87.3203
			743.436	74.9254	84.3536	77.2195	84.5206	79.5401	77.8736	80.9622	79.8017	81.1784	87.0148	85.9558	84.9779	82.1316	80.2547	85.4648	84.9064	85.5904	84.7484	85.7949	87.2652
			743.918	74.8713	84.2936	77.1464	84.4651	79.4725	77.8692	80.9636	79.799	81.1264	86.9963	85.9735	84.9731	82.0255	80.2014	85.4153	84.8378	85.5002	84.675	85.7564	87.2281
			744.4	74.8291	84.2349	77.0657	84.3998	79.4013	77.85	80.9625	79.7897	81.0784	86.9662	85.995	84.9708	81.9263	80.1465	85.3872	84.7689	85.4013	84.6093	85.7269	87.2047
			744.882	74.7952	84.1782	76.9764	84.3212	79.3238	77.8229	80.9522	79.7724	81.0328	86.9219	86.0075	84.9638	81.8351	80.0901	85.3809	84.6965	85.2964	84.5431	85.696	87.1884
			745.364	74.7668	84.1247	76.8823	84.2313	79.2391	77.7979	80.928	79.7483	80.9892	86.8651	86.0029	84.9473	81.7551	80.0341	85.3917	84.6222	85.1898	84.4706	85.6568	87.1724
			745.846	74.74	84.0765	76.7907	84.1383	79.1491	77.7846	80.8893	79.7207	80.9488	86.8032	85.9793	84.9204	81.6919	79.9816	85.4113	84.5526	85.0891	84.3926	85.6095	87.1523
			746.328	74.7092	84.037	76.7103	84.0546	79.0593	77.7892	80.8392	79.695	80.915	86.7477	85.9424	84.8863	81.6521	79.9371	85.4306	84.4974	85.004	84.3177	85.5619	87.1278
			746.811	74.6681	84.0101	76.6485	83.9935	78.9771	77.8124	80.7849	79.6772	80.8919	86.7117	85.9023	84.8512	81.6406	79.9048	85.4425	84.4648	84.9446	84.2593	85.5261	87.1022
			747.293	74.6114	83.9987	76.6091	83.9647	78.9106	77.85	80.7358	79.6725	80.883	86.7062	85.8705	84.8223	81.659	79.8872	85.4441	84.4591	84.9178	84.2301	85.5137	87.0812
			747.775	74.5374	84.0041	76.5919	83.9718	78.8656	77.8945	80.7019	79.6838	80.8893	86.7366	85.8555	84.8058	81.704	79.8841	85.4369	84.4783	84.9257	84.2363	85.5306	87.07
			748.257	74.4493	84.025	76.5929	84.0108	78.8449	77.9383	80.6906	79.7107	80.9087	86.8012	85.8612	84.8044	81.7682	79.8927	85.4259	84.5155	84.9648	84.2747	85.575	87.0714
			748.739	74.3551	84.0578	76.606	84.0728	78.8475	77.9755	80.7054	79.7492	80.9364	86.8918	85.8864	84.8165	81.8415	79.9083	85.4179	84.5614	85.028	84.3337	85.6382	87.0858
			749.221	74.2647	84.0979	76.6249	84.1471	78.8695	78.0028	80.7442	79.7921	80.9663	86.996	85.9267	84.8371	81.9146	79.9257	85.4193	84.6084	85.1073	84.3979	85.7087	87.1111
			749.703	74.1872	84.1409	76.6445	84.2249	78.9057	78.0198	80.8002	79.8309	80.993	87.1011	85.9772	84.8589	81.9805	79.9407	85.4344	84.652	85.1964	84.4539	85.7763	87.144
			750.186	74.1286	84.1841	76.6625	84.3016	78.9509	78.0279	80.8636	79.8581	81.0137	87.1969	86.0342	84.8756	82.0364	79.9512	85.4642	84.6923	85.2922	84.4956	85.8356	87.1817
			750.668	74.0906	84.2268	76.6788	84.3774	79.0015	78.0295	80.9249	79.8695	81.0284	87.2784	86.096	84.8834	82.0829	79.9568	85.5064	84.732	85.3931	84.5259	85.8868	87.2224
			751.15	74.0727	84.2699	76.6954	84.4548	79.0553	78.027	80.9774	79.8653	81.0399	87.3451	86.1624	84.8826	82.1225	79.959	85.5566	84.7739	85.4973	84.5552	85.9338	87.2652
			751.632	74.0737	84.3145	76.7147	84.5367	79.1114	78.0229	81.0184	79.8501	81.0521	87.3997	86.2324	84.8769	82.1581	79.9593	85.6099	84.8194	85.601	84.5964	85.9812	87.3099
			752.114	74.0931	84.3616	76.7382	84.6235	79.1692	78.0196	81.0485	79.8314	81.0689	87.4454	86.3033	84.8725	82.192	79.9594	85.662	84.8676	85.6976	84.6605	86.032	87.3562
			752.596	74.1314	84.4107	76.7656	84.7132	79.2272	78.0188	81.0703	79.817	81.0928	87.4841	86.3703	84.8751	82.2259	79.9602	85.711	84.9158	85.7801	84.7531	86.0867	87.4042
			753.078	74.1879	84.4606	76.7944	84.802	79.2833	78.0215	81.0864	79.8126	81.1251	87.5162	86.4276	84.8887	82.2617	79.963	85.7576	84.9617	85.8439	84.8732	86.1447	87.4544
			753.56	74.2592	84.5103	76.8209	84.8866	79.3347	78.0278	81.0982	79.8201	81.1656	87.541	86.4704	84.9141	82.3023	79.9695	85.8043	85.0039	85.89	85.0148	86.2052	87.5087
			754.043	74.3386	84.5597	76.8414	84.9657	79.3795	78.0375	81.1062	79.8382	81.2134	87.5581	86.497	84.9492	82.3517	79.9824	85.8549	85.043	85.9255	85.1687	86.269	87.57
			754.525	74.417	84.6098	76.854	85.0399	79.4168	78.0507	81.1112	79.8634	81.2679	87.5693	86.5096	84.9902	82.4135	80.0048	85.912	85.0804	85.9616	85.3254	86.3377	87.6415
			755.007	74.4855	84.6624	76.86	85.1112	79.4476	78.069	81.1158	79.8924	81.3285	87.5791	86.5138	85.0331	82.49	80.0393	85.9767	85.1183	86.0094	85.4763	86.4134	87.7246
			755.489	74.5378	84.7191	76.8638	85.1808	79.4742	78.0961	81.1252	79.9236	81.3954	87.594	86.5167	85.0748	82.5815	80.087	86.0476	85.1584	86.0762	85.6151	86.4967	87.8185
			755.971	74.5721	84.781	76.8718	85.2481	79.5	78.1369	81.1459	79.9575	81.4692	87.6211	86.5257	85.1145	82.6859	80.1467	86.1212	85.2027	86.1629	85.7375	86.5867	87.9188
			756.453	74.59	84.8477	76.8909	85.3106	79.5282	78.1958	81.1834	79.9955	81.5501	87.666	86.5461	85.1526	82.8002	80.2148	86.1935	85.2532	86.265	85.8419	86.6816	88.0183
			756.935	74.5947	84.9179	76.926	85.365	79.5611	78.2738	81.2398	80.0382	81.6377	87.7306	86.5806	85.1909	82.9217	80.2855	86.2608	85.3123	86.3745	85.9297	86.7796	88.1092
			757.417	74.5885	84.9897	76.978	85.4086	79.5996	78.3668	81.312	80.0839	81.7305	87.812	86.6291	85.2306	83.0486	80.3529	86.3211	85.3815	86.4841	86.0053	86.8802	88.1845
			757.899	74.5712	85.0614	77.0435	85.4413	79.6427	78.4651	81.3916	80.1282	81.8251	87.9019	86.6887	85.272	83.1799	80.4115	86.3736	85.46	86.5889	86.0745	86.9834	88.2404
			758.382	74.5408	85.1311	77.1154	85.465	79.6878	78.5555	81.4674	80.1652	81.9165	87.9889	86.7542	85.3135	83.3137	80.4578	86.4188	85.5435	86.6875	86.1426	87.0888	88.2768
			758.864	74.4954	85.1967	77.1846	85.4834	79.731	78.6246	81.5289	80.1897	81.9988	88.0606	86.8191	85.3521	83.4459	80.49	86.4572	85.6243	86.7797	86.2123	87.1938	88.2966
			759.346	74.4364	85.2559	77.2424	85.5008	79.7676	78.6629	81.5691	80.1994	82.0662	88.1071	86.8767	85.3842	83.5686	80.5077	86.4889	85.6932	86.8648	86.282	87.2932	88.3054
			759.828	74.37	85.306	77.2832	85.5209	79.7931	78.6677	81.5866	80.1959	82.1151	88.1239	86.9219	85.4066	83.672	80.5117	86.5134	85.7434	86.9404	86.3467	87.3804	88.3103
			760.31	74.3067	85.345	77.305	85.5469	79.8042	78.6443	81.5857	80.1847	82.145	88.1134	86.9532	85.4183	83.7466	80.503	86.5307	85.7742	87.003	86.4001	87.45	88.3189
			760.792	74.2591	85.3727	77.3104	85.5822	79.8	78.6035	81.574	80.1729	82.1593	88.0848	86.9738	85.4216	83.7871	80.4835	86.5418	85.7933	87.0496	86.4376	87.5011	88.3395
			761.274	74.2381	85.3915	77.3058	85.6301	79.7825	78.559	81.5608	80.1673	82.1646	88.0516	86.992	85.4219	83.7947	80.4563	86.5491	85.8151	87.0805	86.4588	87.538	88.3799
			761.756	74.2499	85.4065	77.2996	85.6941	79.7567	78.5225	81.5545	80.1725	82.1686	88.0283	87.0186	85.4272	83.7784	80.4261	86.5564	85.8568	87.0998	86.4681	87.5697	88.4464
			762.239	74.2941	85.424	77.3005	85.7757	79.7298	78.5011	81.5611	80.1905	82.1776	88.026	87.064	85.4453	83.7519	80.3988	86.5671	85.9316	87.1143	86.4734	87.6057	88.5419
			762.721	74.3642	85.4497	77.3152	85.8736	79.7097	78.4962	81.5846	80.2211	82.194	88.0501	87.1337	85.4818	83.7299	80.3812	86.5838	86.0434	87.1313	86.4825	87.6522	88.664
			763.203	74.4494	85.4864	77.3469	85.9825	79.703	78.5046	81.6262	80.2632	82.2165	88.0992	87.2259	85.5375	83.7239	80.3791	86.6069	86.1844	87.1559	86.501	87.7093	88.8044
			763.685	74.537	85.5331	77.3945	86.0931	79.7134	78.521	81.6849	80.3162	82.241	88.1667	87.3309	85.6072	83.7398	80.3963	86.6356	86.3368	87.1894	86.531	87.7717	88.9497
			764.167	74.6136	85.5857	77.4521	86.1949	79.7408	78.54	81.757	80.38	82.2631	88.2436	87.4333	85.6807	83.7773	80.4332	86.6683	86.4782	87.2302	86.5714	87.8318	89.0837
			764.649	74.6674	85.6382	77.5113	86.2792	79.781	78.5586	81.8353	80.4543	82.2814	88.3215	87.5169	85.7449	83.8323	80.4864	86.7047	86.5887	87.276	86.6203	87.8845	89.1915
			765.131	74.6888	85.6853	77.562	86.3414	79.827	78.5758	81.9099	80.5375	82.2986	88.3943	87.5697	85.7875	83.8993	80.5494	86.7457	86.6562	87.3259	86.6763	87.9305	89.2638
			765.614	74.6723	85.7244	77.5959	86.3831	79.871	78.5932	81.9696	80.6262	82.3213	88.4593	87.5872	85.8005	83.9734	80.6139	86.7934	86.6794	87.3813	86.7394	87.9768	89.2992
			766.096	74.6178	85.7557	77.6082	86.4099	79.9065	78.6134	82.0046	80.7149	82.357	88.5161	87.573	85.7824	84.0515	80.6718	86.8493	86.6656	87.4456	86.8103	88.0333	89.3042
			766.578	74.5313	85.7814	77.5993	86.4292	79.93	78.6392	82.009	80.7974	82.4111	88.5651	87.5365	85.7384	84.1317	80.716	86.9129	86.6268	87.5212	86.8883	88.1079	89.2909
			767.06	74.4242	85.8038	77.5739	86.4463	79.9417	78.6726	81.9833	80.8677	82.4836	88.6068	87.4889	85.6777	84.2118	80.7423	86.98	86.5748	87.6079	86.9707	88.2016	89.2728
			767.542	74.3108	85.824	77.5394	86.4634	79.9451	78.7145	81.9338	80.9219	82.5685	88.6412	87.4395	85.6112	84.2887	80.749	87.0437	86.5191	87.702	87.0526	88.3079	89.2612
			768.024	74.205	85.841	77.5033	86.479	79.9451	78.764	81.8714	80.9577	82.6549	88.669	87.3938	85.5477	84.3584	80.7366	87.096	86.4661	87.7965	87.129	88.4141	89.2627
			768.506	74.1162	85.8528	77.4707	86.4908	79.9464	78.8178	81.8084	80.975	82.7302	88.6923	87.3534	85.4925	84.4172	80.7073	87.1308	86.4206	87.8846	87.1969	88.5072	89.279
			768.988	74.0471	85.8576	77.4421	86.4982	79.9513	78.8702	81.755	80.9746	82.7839	88.715	87.3186	85.4466	84.4626	80.6645	87.146	86.3878	87.9616	87.2572	88.5781	89.3075
			769.471	73.993	85.8555	77.4144	86.5035	79.9591	78.9136	81.7167	80.9584	82.8107	88.7417	87.2898	85.4084	84.4947	80.6112	87.1441	86.3731	88.0264	87.314	88.625	89.3435
			769.953	73.9455	85.8487	77.3815	86.5118	79.9654	78.9398	81.694	80.9284	82.811	88.7758	87.269	85.3752	84.5148	80.5502	87.1316	86.3816	88.0807	87.3718	88.6525	89.3819
			770.435	73.8956	85.8409	77.3373	86.5286	79.9639	78.9414	81.6833	80.8875	82.7901	88.8179	87.2592	85.3448	84.525	80.4829	87.1151	86.4151	88.1266	87.4329	88.6684	89.4181
			770.917	73.8381	85.8352	77.2778	86.5563	79.9477	78.9148	81.6797	80.8398	82.7553	88.8643	87.2631	85.3171	84.5258	80.4094	87.0995	86.471	88.1643	87.4944	88.6788	89.4481
			771.399	73.773	85.8331	77.2025	86.5929	79.9115	78.8607	81.6789	80.7909	82.7135	88.9087	87.281	85.2928	84.5167	80.3293	87.0854	86.5409	88.1909	87.5495	88.6865	89.4686
			771.881	73.7042	85.833	77.1145	86.6318	79.8533	78.7855	81.6785	80.7468	82.6699	88.9444	87.3107	85.2731	84.4965	80.2421	87.0699	86.6132	88.2019	87.5898	88.6909	89.4772
			772.363	73.6362	85.8313	77.0189	86.6645	79.775	78.7005	81.6775	80.7123	82.6274	88.9674	87.347	85.2577	84.465	80.1483	87.0486	86.675	88.1941	87.61	88.6904	89.4727
			772.845	73.571	85.8233	76.9214	86.6838	79.6819	78.6189	81.6759	80.6901	82.5874	88.9785	87.3838	85.2449	84.4242	80.05	87.0178	86.7166	88.168	87.6111	88.6855	89.456
			773.327	73.5062	85.8051	76.8267	86.6868	79.5818	78.5534	81.6729	80.6786	82.5503	88.9834	87.4154	85.231	84.3789	79.9508	86.9774	86.733	88.1292	87.6007	88.6801	89.4303
			773.81	73.4359	85.7751	76.7375	86.6759	79.4824	78.5126	81.6672	80.673	82.5163	88.9899	87.4381	85.2119	84.3346	79.8555	86.9305	86.7249	88.0871	87.5901	88.6796	89.401
			774.292	73.354	85.7339	76.6551	86.6573	79.3902	78.4988	81.657	80.6662	82.4851	89.0055	87.4501	85.184	84.2959	79.7687	86.8828	86.6968	88.0514	87.5891	88.6885	89.3742
			774.774	73.2573	85.684	76.5798	86.638	79.3084	78.5075	81.6416	80.6515	82.4558	89.0328	87.4506	85.1459	84.2643	79.6939	86.8398	86.6549	88.029	87.6012	88.7066	89.3553
			775.256	73.1478	85.6292	76.5119	86.6229	79.2377	78.5289	81.6219	80.6241	82.4265	89.0692	87.4394	85.0981	84.2372	79.6321	86.805	86.6051	88.0216	87.622	88.728	89.3475
			775.738	73.0326	85.5737	76.4517	86.6133	79.1756	78.5503	81.601	80.5832	82.3942	89.1072	87.4163	85.0436	84.2098	79.5815	86.7785	86.5518	88.0258	87.6407	88.7426	89.3514
			776.22	72.9208	85.5213	76.3988	86.6072	79.1187	78.5595	81.583	80.5312	82.3563	89.1372	87.3819	84.9863	84.1766	79.5381	86.7575	86.4974	88.0353	87.6448	88.7403	89.3652
			776.702	72.8203	85.4761	76.3521	86.6012	79.063	78.5485	81.5717	80.4732	82.3109	89.1513	87.3381	84.9304	84.1342	79.4966	86.7375	86.4432	88.0439	87.6253	88.7142	89.3848
			777.184	72.7357	85.4416	76.3093	86.5925	79.0059	78.5159	81.5691	80.415	82.2577	89.1456	87.2888	84.8794	84.0827	79.4521	86.7146	86.3892	88.0474	87.5806	88.6639	89.4058
			777.667	72.6678	85.4202	76.2681	86.5804	78.947	78.4675	81.5742	80.3623	82.1986	89.1208	87.2394	84.8357	84.0257	79.4022	86.6865	86.3344	88.0442	87.5163	88.5945	89.4238
			778.149	72.6155	85.4127	76.2271	86.5661	78.8884	78.4152	81.5836	80.3196	82.137	89.0813	87.1953	84.8008	83.9686	79.3475	86.653	86.2773	88.0345	87.4429	88.5139	89.4351
			778.631	72.5785	85.4169	76.1873	86.5515	78.8345	78.3731	81.5927	80.2909	82.0775	89.0327	87.16	84.7754	83.9167	79.2922	86.6159	86.2161	88.0185	87.3709	88.4298	89.4368
			779.113	72.5584	85.4285	76.1525	86.5373	78.7908	78.3542	81.597	80.2801	82.0249	88.9798	87.1341	84.7594	83.8738	79.2432	86.5778	86.1493	87.9955	87.3078	88.3473	89.4266
			779.595	72.5587	85.4405	76.1285	86.5224	78.7623	78.3661	81.5937	80.2907	81.9834	88.9252	87.1148	84.7525	83.841	79.208	86.5414	86.0769	87.9643	87.2561	88.269	89.403
			780.077	72.5824	85.4462	76.1209	86.5038	78.7522	78.4094	81.5822	80.3251	81.9562	88.87	87.0976	84.754	83.8176	79.1935	86.5083	86.0011	87.9242	87.2142	88.1967	89.3656
			780.559	72.6289	85.4401	76.1331	86.4779	78.7603	78.4775	81.5646	80.383	81.9443	88.8143	87.0779	84.7623	83.8012	79.2038	86.4797	85.9263	87.8765	87.1787	88.1328	89.315
			781.041	72.6937	85.4206	76.1647	86.4424	78.7831	78.5589	81.5447	80.4603	81.9461	88.7581	87.0529	84.7758	83.7881	79.2393	86.4553	85.8585	87.8243	87.1457	88.0804	89.2536
			781.524	72.7684	85.3901	76.2112	86.3967	78.8142	78.641	81.5274	80.5489	81.9573	88.7012	87.0225	84.7922	83.7738	79.2967	86.434	85.8034	87.7709	87.1122	88.0421	89.185
			782.006	72.8441	85.3537	76.2656	86.343	78.8464	78.7136	81.5178	80.6377	81.9715	88.6435	86.989	84.8089	83.7531	79.3698	86.4136	85.7645	87.7184	87.0749	88.0173	89.1133
			782.488	72.9144	85.318	76.3211	86.2847	78.8736	78.7718	81.5203	80.7151	81.9819	88.5838	86.9549	84.823	83.7206	79.4504	86.3914	85.7423	87.6655	87.0305	88.0008	89.0424
			782.97	72.9772	85.2878	76.3725	86.2257	78.8923	78.8158	81.5374	80.7713	81.9825	88.5209	86.9218	84.8312	83.6727	79.5298	86.3645	85.733	87.6081	86.9751	87.9833	88.9751
			783.452	73.0339	85.2649	76.4179	86.1688	78.9027	78.8496	81.5689	80.8007	81.9705	88.4533	86.889	84.8297	83.6085	79.5997	86.3307	85.73	87.5405	86.9061	87.9537	88.9119
			783.934	73.0871	85.2468	76.4584	86.1153	78.9076	78.8781	81.6114	80.803	81.9468	88.3809	86.8539	84.815	83.5314	79.6532	86.2889	85.7249	87.4585	86.8234	87.904	88.8511
			784.416	73.1376	85.2276	76.4958	86.0648	78.9111	78.9047	81.6587	80.7829	81.9157	88.3054	86.8135	84.7845	83.4488	79.6851	86.2398	85.7089	87.3618	86.7304	87.8314	88.7884
			784.898	73.1823	85.1999	76.5313	86.0152	78.9162	78.93	81.7027	80.7479	81.8826	88.2308	86.7655	84.7373	83.3698	79.6926	86.1855	85.6748	87.2544	86.6331	87.7398	88.7182
			785.381	73.2149	85.1568	76.5631	85.9634	78.9234	78.9525	81.735	80.706	81.8516	88.1615	86.7097	84.6754	83.3017	79.6747	86.1285	85.6177	87.1429	86.5379	87.6366	88.6345
			785.863	73.2281	85.0943	76.586	85.906	78.9294	78.9696	81.7498	80.6632	81.823	88.1013	86.6478	84.6033	83.2467	79.6324	86.0706	85.5354	87.034	86.4479	87.5289	88.5331
			786.345	73.2164	85.0123	76.5927	85.8394	78.9281	78.9799	81.7444	80.6227	81.7921	88.0515	86.5827	84.5275	83.2004	79.5678	86.0121	85.429	86.9311	86.3609	87.4196	88.413
			786.827	73.1781	84.9143	76.5752	85.7609	78.9122	78.9838	81.7195	80.5839	81.7506	88.0101	86.517	84.4547	83.1529	79.4837	85.9512	85.3027	86.8335	86.2692	87.3063	88.2778
			787.309	73.116	84.8067	76.5272	85.6685	78.8752	78.9835	81.6789	80.5442	81.6888	87.9729	86.4519	84.3901	83.0912	79.3838	85.8845	85.1627	86.7365	86.1628	87.1829	88.1351
			787.791	73.0348	84.6969	76.4461	85.5615	78.8134	78.9817	81.6271	80.5002	81.599	87.9342	86.3869	84.3355	83.0042	79.2717	85.8077	85.0166	86.6333	86.0328	87.044	87.9954
			788.273	72.9394	84.5909	76.3337	85.4403	78.7271	78.9802	81.5677	80.449	81.4779	87.8884	86.3205	84.2893	82.8852	79.1514	85.7163	84.8711	86.5175	85.8757	86.8878	87.8688
			788.755	72.8331	84.4916	76.1959	85.3056	78.6196	78.9784	81.5025	80.3897	81.3277	87.8313	86.2503	84.2468	82.7339	79.0267	85.6065	84.7298	86.3843	85.6938	86.7184	87.7621
			789.237	72.7172	84.3974	76.0407	85.1585	78.4964	78.9733	81.4315	80.3233	81.1546	87.7602	86.1746	84.2016	82.5544	78.9007	85.4752	84.5925	86.2303	85.4945	86.543	87.676
			789.72	72.5927	84.3024	75.8762	84.999	78.3627	78.9602	81.3534	80.2528	80.9659	87.673	86.0916	84.1483	82.3523	78.7753	85.3204	84.4547	86.0531	85.2859	86.3685	87.6046
			790.202	72.4622	84.1976	75.7087	84.8269	78.2217	78.9343	81.2676	80.182	80.7681	87.5674	85.9993	84.0837	82.1317	78.6509	85.141	84.309	85.8506	85.0737	86.1971	87.5362
			790.684	72.33	84.0731	75.5405	84.6417	78.0736	78.8923	81.1739	80.1144	80.5645	87.4411	85.8948	84.007	81.8936	78.5257	84.9377	84.147	85.621	84.8587	86.0246	87.4567
			791.166	72.201	83.9204	75.3704	84.4428	77.9158	78.8328	81.0731	80.0516	80.3554	87.2914	85.7741	83.9195	81.6364	78.3962	84.7133	83.9617	85.3648	84.6377	85.8415	87.3521
			791.648	72.0777	83.7343	75.1934	84.2301	77.7439	78.7567	80.9656	79.9924	80.1385	87.1171	85.6322	83.822	81.3577	78.2576	84.4726	83.7484	85.0851	84.4056	85.6367	87.2117
			792.13	71.9571	83.5135	75.0026	84.003	77.5527	78.6667	80.8499	79.9322	79.9108	86.9186	85.4642	83.7137	81.0561	78.1042	84.2215	83.5049	84.7884	84.1579	85.4016	87.0291
			792.612	71.8302	83.26	74.7906	83.7595	77.3375	78.5661	80.7227	79.8636	79.6685	86.6984	85.2666	83.5906	80.7319	77.9304	83.9652	83.2304	84.4822	83.8923	85.1324	86.8024
			793.095	71.6837	82.9772	74.552	83.4951	77.0956	78.4578	80.5785	79.7779	79.4083	86.4604	85.0378	83.446	80.3872	77.7323	83.7059	82.9243	84.1721	83.6078	84.83	86.5328
			793.577	71.5047	82.6686	74.2852	83.2033	76.8267	78.3445	80.4127	79.6674	79.1264	86.2079	84.7789	83.2726	80.0233	77.5074	83.4413	82.586	83.8581	83.3031	84.4972	86.2236
			794.059	71.2865	82.3359	73.9924	82.8765	76.5327	78.2283	80.2234	79.5273	78.8191	85.9428	84.4932	83.0645	79.6404	77.2556	83.1653	82.2156	83.5338	82.9742	84.1358	85.88
			794.541	71.0315	81.9804	73.68	82.5089	76.2183	78.111	80.0135	79.3572	78.4825	85.6649	84.186	82.8203	79.2365	76.9786	82.8691	81.815	83.1875	82.6148	83.7451	85.5084
			795.023	70.7522	81.603	73.3566	82.0987	75.8896	77.9944	79.7909	79.1617	78.1138	85.3727	83.863	82.5438	78.8092	76.68	82.5451	81.3896	82.806	82.2178	83.3221	85.1171
			795.505	70.4668	81.2062	73.0312	81.6499	75.5536	77.8805	79.5666	78.9491	77.7124	85.0647	83.53	82.244	78.3566	76.3646	82.1896	80.9475	82.3794	81.7787	82.8641	84.7152
			795.987	70.1945	80.7943	72.7109	81.1708	75.2168	77.7714	79.3519	78.7298	77.2799	84.7401	83.1919	81.9329	77.8786	76.0376	81.8049	80.4981	81.9039	81.2979	82.3713	84.3106
			796.469	69.9493	80.3729	72.4003	80.672	74.8843	77.6691	79.1542	78.5135	76.8211	84.4001	82.8515	81.6221	77.3767	75.7049	81.3988	80.0486	81.3828	80.7815	81.8469	83.9078
			796.952	69.7372	79.9469	72.1009	80.1625	74.5588	77.576	78.9753	78.3074	76.3419	84.047	82.5099	81.3209	76.853	75.3722	80.9824	79.6022	80.8237	80.2391	81.2969	83.5055
			797.434	69.5573	79.5193	71.813	79.6469	74.241	77.4941	78.811	78.1151	75.8492	83.6832	82.1663	81.034	76.3084	75.0452	80.5665	79.1569	80.2345	79.6805	80.7267	83.0968
			797.916	69.4043	79.0897	71.5367	79.1247	73.9301	77.4255	78.6536	77.9373	75.3496	83.3102	81.8192	80.7619	75.7421	74.729	80.1589	78.7066	79.6205	79.1113	80.1389	82.6708
			798.398	69.273	78.655	71.2734	78.5923	73.6249	77.3711	78.4946	77.7726	74.8489	82.9277	81.4668	80.5026	75.1526	74.428	79.7626	78.2437	78.9828	78.5316	79.5324	82.2163
			798.88	69.1608	78.2103	71.0251	78.0455	73.3244	77.33	78.3286	77.6189	74.3518	82.5337	81.1079	80.253	74.5391	74.1444	79.3763	77.762	78.3203	77.9362	78.9035	81.725
			799.362	69.0684	77.7512	70.7935	77.4818	73.028	77.2993	78.1541	77.4741	73.862	82.1253	80.7425	80.0107	73.9038	73.8784	78.996	77.2586	77.6312	77.3173	78.2482	81.1937
			799.844	68.9985	77.2751	70.5792	76.9021	72.7356	77.274	77.9747	77.3368	73.3814	81.6994	80.3716	79.7748	73.2526	73.6274	78.6178	76.7343	76.9163	76.668	77.5639	80.624
			800.326	68.9548	76.7832	70.3808	76.3093	72.4482	77.2489	77.7968	77.2064	72.9106	81.254	79.9968	79.546	72.5945	73.388	78.2397	76.1932	76.1789	75.9857	76.8506	80.0209
			800.808	68.9406	76.2796	70.1971	75.7072	72.168	77.2201	77.6279	77.0829	72.4496	80.7892	79.62	79.3261	71.9399	73.1571	77.8644	75.6409	75.4246	75.273	76.1108	79.3903
			801.291	68.9589	75.7714	70.0283	75.099	71.8993	77.1873	77.4744	76.9673	71.9988	80.3082	79.2435	79.1175	71.2982	72.9349	77.4987	75.0838	74.6595	74.5387	75.3481	78.7379
			801.773	69.0132	75.2677	69.8789	74.4877	71.6493	77.1546	77.3409	76.8617	71.5613	79.8173	78.8707	78.9226	70.6773	72.7262	77.1534	74.5296	73.8899	73.7962	74.5668	78.0702
			802.255	69.1068	74.7787	69.7575	73.8781	71.4274	77.1296	77.2297	76.7695	71.1437	79.3264	78.5065	78.7439	70.0834	72.5395	76.8415	73.9877	73.1224	73.0626	73.7734	77.396
			802.737	69.2419	74.3156	69.6762	73.2787	71.2446	77.1213	77.1419	76.695	70.7567	78.8484	78.1582	78.5837	69.5225	72.3862	76.5761	73.47	72.3665	72.3571	72.9782	76.7293
			803.219	69.4178	73.8899	69.6469	72.7037	71.1107	77.1379	77.0781	76.6431	70.4137	78.3975	77.8355	78.4446	69.0019	72.2768	76.3683	72.9919	71.6357	71.6994	72.1976	76.0899
			803.701	69.6298	73.5139	69.6784	72.1728	71.0326	77.1845	77.0393	76.6188	70.1286	77.9888	77.5504	78.3304	68.5317	72.2191	76.2255	72.5711	70.9495	71.1089	71.4545	75.5012
			804.183	69.8705	73.2005	69.7749	71.7092	71.0135	77.2627	77.0285	76.627	69.9136	77.6364	77.3162	78.2467	68.125	72.2175	76.1519	72.2271	70.3321	70.6034	70.778	74.9882
			804.665	70.133	72.9637	69.9359	71.3367	71.0536	77.3714	77.0504	76.673	69.7787	77.354	77.1464	78.2023	67.7984	72.2743	76.149	71.9804	69.8109	70.1995	70.2007	74.5735
			805.148	70.4137	72.8187	70.1593	71.0778	71.1528	77.509	77.112	76.763	69.732	77.1552	77.0542	78.2092	67.5712	72.3921	76.2181	71.8508	69.4144	69.9131	69.7553	74.2764
			805.63	70.7158	72.781	70.4434	70.9511	71.3124	77.675	77.2212	76.9036	69.7809	77.0545	77.0514	78.2817	67.4647	72.5764	76.3619	71.8559	69.1695	69.7607	69.4728	74.1127
			806.112	71.0478	72.8645	70.7892	70.9709	71.5369	77.8699	77.385	77.1014	69.9332	77.0667	77.1468	78.4337	67.5001	72.8351	76.5849	72.0092	69.0998	69.7589	69.379	74.0947
			806.594	71.4205	73.0785	71.199	71.1462	71.8332	78.0944	77.607	77.3607	70.196	77.2052	77.3452	78.6752	67.6952	73.1766	76.8917	72.3165	69.2222	69.9227	69.4927	74.2317
			807.076	71.8419	73.4244	71.674	71.4788	72.2074	78.3472	77.8856	77.681	70.5738	77.4781	77.6452	79.0087	68.0609	73.6056	77.2848	72.7739	69.5448	70.2617	69.822	74.5275
			807.558	72.3121	73.8942	72.2108	71.9624	72.6624	78.6233	78.2135	78.0555	71.0651	77.8842	78.039	79.4273	68.5974	74.1192	77.7616	73.367	70.0643	70.7763	70.3625	74.978
			808.04	72.8223	74.4715	72.8003	72.5824	73.195	78.9138	78.5787	78.4711	71.6609	78.4115	78.5133	79.9153	69.2931	74.7054	78.3134	74.073	70.765	71.4546	71.0961	75.5692
			808.523	73.3563	75.1347	73.4274	73.3167	73.7953	79.2075	78.9677	78.9101	72.3443	79.0375	79.0512	80.4514	70.1248	75.3441	78.9255	74.8633	71.6205	72.2723	71.9913	76.2781
			809.005	73.8954	75.8606	74.074	74.139	74.4473	79.4935	79.368	79.3537	73.0927	79.7322	79.6353	81.0132	71.0611	76.0112	79.5789	75.7082	72.5963	73.1952	73.007	77.0746
			809.487	74.4228	76.6282	74.7216	75.0207	75.1313	79.7635	79.7703	79.7846	73.881	80.4631	80.2488	81.5811	72.0659	76.6827	80.2528	76.5789	73.6532	74.1832	74.0956	77.9264
			809.969	74.927	77.4189	75.3547	75.9338	75.8252	80.0133	80.1686	80.1898	74.6844	81.1992	80.8766	82.1399	73.1021	77.3384	80.9265	77.4497	74.7502	75.1951	75.2086	78.8026
			810.451	75.4015	78.2156	75.9614	76.8522	76.5072	80.243	80.5592	80.5615	75.4807	81.9149	81.504	82.6788	74.1342	77.9631	81.5813	78.2985	75.848	76.193	76.301	79.6764
			810.933	75.8436	79.0017	76.5345	77.753	77.157	80.4554	80.9386	80.8971	76.2512	82.5916	82.1169	83.1902	75.1312	78.5473	82.2016	79.1072	76.9114	77.146	77.3364	80.5263
			811.415	76.2516	79.76	77.0699	78.6174	77.7582	80.6542	81.3022	81.1981	76.9814	83.2185	82.7018	83.6683	76.0689	79.086	82.776	79.8618	77.9125	78.0331	78.2905	81.3356
			811.897	76.6236	80.474	77.5663	79.4305	78.3001	80.8426	81.6445	81.4684	77.6608	83.792	83.2468	84.1085	76.9315	79.578	83.2984	80.5528	78.8328	78.8437	79.1534	82.0923
			812.38	76.9574	81.1301	78.0238	80.1822	78.7787	81.022	81.9598	81.7131	78.2828	84.3139	83.7438	84.508	77.7116	80.0246	83.7674	81.1747	79.6637	79.5767	79.9269	82.7867
			812.862	77.2523	81.7196	78.443	80.866	79.1963	81.1924	82.2433	81.9366	78.844	84.7887	84.1894	84.8653	78.4091	80.4293	84.1858	81.726	80.4049	80.237	80.621	83.4121
			813.344	77.5097	82.2398	78.8242	81.4779	79.5596	81.3519	82.4924	82.1415	79.3437	85.2209	84.5842	85.1812	79.0281	80.7962	84.5586	82.2083	81.0613	80.8318	81.2471	83.9635
			813.826	77.7338	82.6929	79.1666	82.0158	79.8769	81.4975	82.7065	82.3282	79.7841	85.6133	84.9319	85.4575	79.5745	81.1296	84.8911	82.6262	81.6397	81.3671	81.8137	84.4389
			814.308	77.9304	83.0847	79.4686	82.4794	80.1555	81.6258	82.8867	82.4948	80.1694	85.9657	85.2368	85.6962	80.054	81.4327	85.187	82.9866	82.1467	81.8462	82.3242	84.8398
			814.79	78.1043	83.4219	79.7277	82.8702	80.3995	81.7334	83.035	82.6385	80.5058	86.2755	85.5024	85.8986	80.4713	81.7067	85.4481	83.2981	82.5875	82.2699	82.778	85.1716
			815.272	78.2581	83.7108	79.942	83.1924	80.6097	81.8173	83.1535	82.7566	80.8001	86.5391	85.73	86.0653	80.8314	81.9507	85.6745	83.5696	82.9671	82.6383	83.1734	85.4434
			815.754	78.3915	83.9565	80.1111	83.4529	80.7846	81.8766	83.2451	82.8484	81.0588	86.7537	85.9202	86.1961	81.1398	82.1618	85.8657	83.8089	83.2911	82.9524	83.5113	85.6662
			816.236	78.5027	84.1634	80.2374	83.6603	80.9227	81.9125	83.3133	82.9155	81.2859	86.9192	86.0732	86.292	81.4032	82.3368	86.0221	84.0217	83.5666	83.2158	83.7961	85.8507
			816.719	78.5914	84.3358	80.3267	83.8245	81.0251	81.9292	83.3635	82.9631	81.4833	87.0389	86.1912	86.356	81.6299	82.4736	86.1462	84.2106	83.8021	83.4346	84.0363	86.0058
			817.201	78.6608	84.4798	80.3881	83.9548	81.0973	81.9335	83.4022	82.9982	81.6502	87.1202	86.2792	86.3942	81.8284	82.5731	86.2436	84.3765	84.0071	83.6168	84.2416	86.1379
			817.683	78.7181	84.6026	80.433	84.0602	81.1496	81.9344	83.4366	83.0295	81.7862	87.174	86.3454	86.4151	82.0069	82.6401	86.3227	84.5202	84.1914	83.7717	84.4215	86.252
			818.165	78.7726	84.7131	80.4733	84.1492	81.1957	81.941	83.4734	83.0645	81.8929	87.2134	86.4004	86.4291	82.1732	82.6832	86.394	84.6438	84.3644	83.9093	84.5838	86.3529
			818.647	78.8327	84.8195	80.5193	84.231	81.2498	81.9608	83.5173	83.1092	81.9763	87.2518	86.4551	86.4459	82.3337	82.7135	86.4685	84.7515	84.5347	84.0395	84.7346	86.4466
			819.129	78.9014	84.9285	80.578	84.3146	81.3232	81.9977	83.5702	83.1659	82.0464	87.3007	86.5185	86.4725	82.4934	82.7419	86.5554	84.8493	84.7088	84.1709	84.879	86.54
			819.611	78.9751	85.043	80.6518	84.408	81.4214	82.0513	83.631	83.2337	82.1156	87.3667	86.5955	86.5123	82.655	82.7763	86.6601	84.9426	84.8901	84.3097	85.0214	86.6397
			820.093	79.0443	85.1621	80.7382	84.5167	81.5423	82.1167	83.6966	83.3083	82.1944	87.4509	86.6858	86.5643	82.8179	82.8201	86.7825	85.0343	85.0776	84.4577	85.165	86.7497
			820.576	79.0974	85.2812	80.8311	84.6416	81.6776	82.1858	83.7635	83.3835	82.2881	87.5486	86.784	86.6242	82.9782	82.8715	86.917	85.1231	85.2655	84.6114	85.3109	86.8702
			821.058	79.1251	85.3937	80.9226	84.7786	81.8147	82.2489	83.8287	83.4525	82.3949	87.6511	86.8816	86.6863	83.1293	82.9255	87.054	85.2044	85.4438	84.7631	85.4569	86.9974
			821.54	79.1246	85.4934	81.0055	84.9198	81.9409	82.2977	83.8905	83.5098	82.5066	87.7491	86.9689	86.7453	83.2633	82.9759	87.1826	85.2723	85.6016	84.9032	85.5982	87.1248
			822.022	79.0999	85.5765	81.075	85.0553	82.0466	82.3263	83.9475	83.5519	82.6119	87.8355	87.0387	86.7975	83.3742	83.0189	87.2938	85.3226	85.7303	85.0238	85.7293	87.2463
			822.504	79.0609	85.6429	81.1295	85.1773	82.1274	82.3331	83.9988	83.5788	82.7006	87.9087	87.0874	86.8414	83.46	83.0542	87.3832	85.3556	85.8273	85.1221	85.8464	87.3586
			822.986	79.0187	85.6961	81.1707	85.281	82.1846	82.3208	84.0429	83.5931	82.7678	87.972	87.1162	86.8774	83.5247	83.0858	87.4518	85.3765	85.8973	85.2019	85.9498	87.4618
			823.468	78.9825	85.7422	81.2022	85.3668	82.224	82.296	84.078	83.5999	82.8147	88.0324	87.1302	86.907	83.5771	83.1193	87.5049	85.3942	85.9515	85.2723	86.0445	87.5586
			823.951	78.9564	85.7876	81.2277	85.4378	82.2527	82.2675	84.1028	83.6044	82.8476	88.0973	87.1363	86.9322	83.6278	83.1594	87.5496	85.4189	86.0033	85.3436	86.1377	87.6521
			824.433	78.9404	85.8371	81.2496	85.4985	82.2768	82.2439	84.118	83.6111	82.8749	88.1707	87.1406	86.9547	83.6852	83.2068	87.5911	85.4583	86.0639	85.4228	86.2355	87.7435
			824.915	78.9317	85.8924	81.268	85.5521	82.2995	82.2318	84.1265	83.6215	82.9031	88.2512	87.1475	86.9759	83.7524	83.2572	87.6312	85.5163	86.1381	85.5097	86.3397	87.8307
			825.397	78.9283	85.9522	81.281	85.6	82.3213	82.2346	84.1338	83.6343	82.9346	88.3325	87.1584	86.9969	83.8265	83.3026	87.6676	85.5924	86.2236	85.5974	86.4461	87.9094
			825.879	78.9296	86.013	81.2856	85.6426	82.3405	82.2513	84.1459	83.6454	82.9682	88.4053	87.1732	87.0187	83.8997	83.3337	87.6958	85.6827	86.3129	85.6749	86.5459	87.9754
			826.361	78.9374	86.0707	81.2799	85.6806	82.3557	82.2779	84.1677	83.65	83.0007	88.461	87.1913	87.0418	83.9629	83.3437	87.7119	85.7819	86.397	85.732	86.6299	88.027
			826.843	78.9535	86.1222	81.264	85.7164	82.3671	82.3082	84.2007	83.6439	83.0296	88.495	87.2131	87.0665	84.0096	83.3315	87.7148	85.8838	86.4696	85.7644	86.6918	88.0664
			827.325	78.9785	86.166	81.2411	85.7541	82.3766	82.3364	84.2417	83.626	83.0546	88.5085	87.2404	87.092	84.0382	83.3028	87.7074	85.9829	86.529	85.7759	86.7321	88.0991
			827.808	79.0102	86.2022	81.2168	85.7982	82.3878	82.3587	84.2835	83.5987	83.0781	88.5076	87.2754	87.1167	84.0524	83.2679	87.6958	86.0735	86.5779	85.7768	86.7573	88.1317
			828.29	79.0447	86.2317	81.1976	85.851	82.4042	82.3744	84.3172	83.568	83.1037	88.5013	87.3196	87.1384	84.0592	83.239	87.6867	86.15	86.6209	85.78	86.7773	88.1684
			828.772	79.0775	86.2551	81.1896	85.9111	82.428	82.3856	84.3349	83.5419	83.1342	88.4983	87.3721	87.1548	84.0659	83.2256	87.6852	86.2071	86.6612	85.7959	86.8015	88.2095
			829.254	79.1052	86.2726	81.196	85.9731	82.4594	82.3963	84.3323	83.5282	83.1704	88.5048	87.4294	87.164	84.0781	83.2318	87.6933	86.2413	86.6994	85.8287	86.8353	88.2509
			829.736	79.127	86.2836	81.2167	86.0293	82.4966	82.4104	84.3105	83.5325	83.2108	88.5239	87.4855	87.1656	84.0981	83.2553	87.7101	86.2523	86.7332	85.8762	86.8785	88.286
			830.218	79.1437	86.2876	81.2479	86.0725	82.5363	82.4304	84.2752	83.557	83.2528	88.5552	87.5341	87.1602	84.1257	83.2886	87.7328	86.244	86.7596	85.9316	86.927	88.3086
			830.7	79.1571	86.285	81.2836	86.0984	82.5756	82.4565	84.2353	83.5995	83.2943	88.5966	87.5699	87.1498	84.1595	83.3222	87.7589	86.2239	86.7766	85.9872	86.9748	88.3147
			831.182	79.1676	86.2773	81.317	86.1075	82.6118	82.4875	84.1999	83.6549	83.3342	88.6451	87.5905	87.1364	84.1979	83.3477	87.7868	86.2014	86.7853	86.0375	87.0168	88.3042
			831.664	79.1743	86.267	81.3427	86.1039	82.6433	82.5205	84.1759	83.7156	83.3731	88.697	87.5965	87.1217	84.2395	83.3607	87.8158	86.1847	86.7886	86.0808	87.0501	88.2796
			832.147	79.1751	86.2569	81.3575	86.0937	82.6697	82.5534	84.1663	83.7742	83.4111	88.7478	87.5907	87.1062	84.2825	83.3617	87.8455	86.1789	86.7895	86.1173	87.0743	88.2448
			832.629	79.1686	86.2495	81.3611	86.0823	82.6904	82.5843	84.1698	83.8239	83.4472	88.7923	87.5769	87.0897	84.3243	83.3551	87.8739	86.1848	86.7895	86.1479	87.0896	88.204
			833.111	79.1554	86.246	81.3552	86.0731	82.7054	82.6126	84.1826	83.8602	83.4779	88.8243	87.5583	87.0716	84.3607	83.3471	87.8978	86.2002	86.7873	86.1716	87.0964	88.1612
			833.593	79.1389	86.2465	81.3428	86.0672	82.7147	82.6381	84.1992	83.8809	83.4986	88.8375	87.5372	87.0518	84.3873	83.3433	87.9128	86.2214	86.7801	86.1855	87.0946	88.1206
			834.075	79.1249	86.25	81.3265	86.0646	82.7189	82.6604	84.215	83.8864	83.5053	88.8274	87.5149	87.0313	84.4003	83.3468	87.9157	86.2456	86.7654	86.1854	87.0845	88.0876
			834.557	79.1195	86.2549	81.3087	86.0655	82.7192	82.679	84.2268	83.8792	83.4971	88.7924	87.4925	87.0129	84.3988	83.3576	87.9059	86.2718	86.7435	86.1687	87.0677	88.0687
			835.039	79.1269	86.2597	81.291	86.0708	82.7177	82.6933	84.2336	83.8642	83.4774	88.7352	87.4715	86.9998	84.3849	83.3736	87.8865	86.2999	86.7178	86.1361	87.0477	88.0693
			835.521	79.1481	86.2629	81.2751	86.0815	82.7171	82.7031	84.2361	83.8474	83.4541	88.6626	87.4539	86.9958	84.3635	83.3912	87.8636	86.3298	86.6942	86.0919	87.0288	88.0922
			836.004	79.1805	86.2631	81.2641	86.0976	82.7195	82.7098	84.2361	83.8354	83.4373	88.584	87.442	87.0031	84.3406	83.4078	87.8443	86.3594	86.6782	86.0435	87.0153	88.1351
			836.486	79.2192	86.2589	81.2621	86.1166	82.7263	82.7158	84.2352	83.8338	83.4359	88.5098	87.4368	87.0218	84.3215	83.4224	87.8339	86.3844	86.6725	85.9987	87.0094	88.19
			836.968	79.2585	86.2492	81.2743	86.1336	82.7378	82.7249	84.2343	83.8461	83.4551	88.4496	87.4379	87.0494	84.3096	83.4359	87.8346	86.399	86.6761	85.9639	87.0107	88.2449
			837.45	79.2934	86.2334	81.3054	86.1421	82.7533	82.7405	84.2332	83.8727	83.4943	88.4104	87.4429	87.0814	84.3058	83.4507	87.8443	86.3981	86.6847	85.9427	87.0171	88.287
			837.932	79.32	86.2116	81.3578	86.1362	82.7718	82.7654	84.2305	83.9106	83.5479	88.3959	87.448	87.1115	84.3096	83.4692	87.8582	86.3793	86.6927	85.9352	87.0258	88.3065
			838.414	79.336	86.1851	81.4296	86.1126	82.7921	82.8001	84.2237	83.9538	83.6061	88.4055	87.4489	87.1337	84.3194	83.4925	87.8709	86.3443	86.6956	85.9387	87.0346	88.2994
			838.896	79.3398	86.1561	81.514	86.0715	82.8131	82.8429	84.2106	83.995	83.6582	88.4345	87.4418	87.1438	84.3328	83.5192	87.8778	86.2978	86.6911	85.9486	87.0422	88.2684
			839.379	79.3309	86.1275	81.5999	86.0166	82.8336	82.8898	84.1897	84.0271	83.6942	88.4743	87.4248	87.1397	84.3464	83.5451	87.8768	86.246	86.6783	85.9586	87.0474	88.221
			839.861	79.3098	86.1022	81.6741	85.9533	82.8516	82.9353	84.1609	84.0446	83.7077	88.5139	87.3981	87.1226	84.3556	83.5641	87.8683	86.1942	86.6568	85.962	87.0476	88.1663
			840.343	79.2786	86.0823	81.7242	85.887	82.8645	82.9737	84.1261	84.0451	83.6956	88.5417	87.3638	87.0961	84.3546	83.5695	87.8537	86.1456	86.6247	85.9524	87.0379	88.1118
			840.825	79.2413	86.0687	81.7417	85.8221	82.8693	82.9997	84.0888	84.0289	83.6591	88.5484	87.3253	87.0652	84.3373	83.5565	87.835	86.1006	86.5788	85.9251	87.0117	88.0617
			841.307	79.2032	86.0611	81.7238	85.762	82.8633	83.0091	84.0537	83.9989	83.6029	88.5292	87.2866	87.0346	84.2998	83.5237	87.8135	86.0585	86.5162	85.8791	86.9633	88.0163
			841.789	79.1693	86.0579	81.674	85.7092	82.8454	83.0002	84.0253	83.9591	83.535	88.4854	87.2514	87.0078	84.2425	83.4742	87.7902	86.018	86.4368	85.8181	86.8902	87.9741
			842.271	79.1433	86.0565	81.6008	85.6655	82.8166	82.9735	84.0071	83.9143	83.4649	88.4243	87.2223	86.9857	84.1708	83.4152	87.7661	85.9781	86.3451	85.7504	86.7957	87.9326
			842.753	79.1253	86.0533	81.5155	85.632	82.7797	82.9323	84.0001	83.8687	83.4025	88.3569	87.1999	86.9665	84.0943	83.356	87.7422	85.9382	86.25	85.6868	86.6883	87.8898
			843.236	79.1121	86.044	81.4285	85.6077	82.7383	82.8822	84.0024	83.8253	83.3555	88.2944	87.1826	86.9461	84.0237	83.3052	87.7195	85.8971	86.1625	85.6374	86.5792	87.8439
			843.718	79.0981	86.0238	81.3471	85.5893	82.6957	82.83	84.0094	83.786	83.3278	88.2451	87.1669	86.9192	83.9673	83.2681	87.6983	85.8528	86.0916	85.6074	86.4785	87.7941
			844.2	79.077	85.9885	81.2743	85.5703	82.6531	82.7821	84.0147	83.7519	83.318	88.2116	87.1476	86.8811	83.9278	83.2446	87.6774	85.8022	86.0405	85.5957	86.3919	87.7394
			844.682	79.0446	85.9351	81.2093	85.5433	82.6098	82.7439	84.0107	83.7231	83.3201	88.1911	87.1201	86.8288	83.9016	83.2301	87.654	85.7426	86.0057	85.5949	86.3192	87.6799
			845.164	78.9996	85.8632	81.1484	85.5019	82.5639	82.7178	83.9909	83.6993	83.325	88.177	87.0812	86.7624	83.8805	83.2161	87.6247	85.6735	85.9785	85.5938	86.2562	87.6172
			845.646	78.9439	85.7755	81.0876	85.4436	82.5134	82.7038	83.9505	83.6803	83.323	88.1617	87.0312	86.6848	83.8547	83.1939	87.5865	85.5973	85.9485	85.5819	86.1975	87.5553
			846.128	78.8816	85.6781	81.024	85.3716	82.4586	82.6993	83.8884	83.6659	83.3063	88.1396	86.9738	86.6017	83.8171	83.1569	87.5387	85.5199	85.9084	85.5529	86.1401	87.4999
			846.61	78.8175	85.5793	80.9571	85.2939	82.4019	82.7007	83.8072	83.6559	83.2714	88.1088	86.9157	86.5199	83.7651	83.1028	87.4831	85.4486	85.8565	85.5065	86.0844	87.4573
			847.092	78.7553	85.488	80.8886	85.221	82.3478	82.7043	83.7137	83.6499	83.2187	88.0705	86.8642	86.4458	83.7005	83.0338	87.4243	85.3901	85.7971	85.4474	86.0343	87.4315
			847.575	78.6968	85.4123	80.8213	85.1619	82.3013	82.7072	83.617	83.6465	83.1525	88.0282	86.8254	86.3846	83.6277	82.9551	87.3675	85.3478	85.7373	85.3826	85.9934	87.4226
			848.057	78.6419	85.3574	80.7581	85.1213	82.265	82.7067	83.5277	83.6425	83.0781	87.985	86.802	86.3391	83.551	82.8728	87.3171	85.3215	85.6834	85.3172	85.9622	87.426
			848.539	78.5893	85.3252	80.7007	85.0979	82.2383	82.7002	83.4552	83.6329	83.0012	87.9425	86.7929	86.3097	83.4726	82.7918	87.275	85.307	85.6376	85.2528	85.9367	87.4339
			849.021	78.5363	85.314	80.6486	85.0854	82.2164	82.6839	83.4059	83.6113	82.9256	87.9006	86.7932	86.2948	83.3921	82.7137	87.24	85.2984	85.5967	85.1871	85.9087	87.4376
			849.503	78.4801	85.3183	80.5994	85.075	82.1915	82.6532	83.3815	83.571	82.854	87.8583	86.796	86.2906	83.3086	82.6377	87.2088	85.2899	85.5541	85.1161	85.8695	87.4309
			849.985	78.4172	85.3308	80.5497	85.0588	82.155	82.604	83.3787	83.5075	82.7876	87.8148	86.7945	86.2928	83.2219	82.561	87.1777	85.2778	85.503	85.0367	85.8127	87.4115
			850.467	78.3448	85.3427	80.4957	85.0314	82.1006	82.5343	83.3897	83.4205	82.7272	87.7706	86.7836	86.2967	83.1346	82.481	87.144	85.2601	85.4401	84.9493	85.7376	87.3811
			850.949	78.2609	85.3455	80.4347	84.9914	82.0256	82.4465	83.4046	83.3154	82.673	87.7277	86.761	86.2983	83.0517	82.3968	87.1075	85.2369	85.3671	84.8582	85.6492	87.3444
			851.432	78.1662	85.3331	80.3657	84.9401	81.932	82.3483	83.4139	83.203	82.6251	87.6888	86.7271	86.2953	82.9793	82.3099	87.0703	85.2088	85.2905	84.7702	85.5559	87.3058
			851.914	78.0639	85.3028	80.2894	84.8809	81.8258	82.251	83.4109	83.0972	82.5831	87.6563	86.6841	86.2872	82.922	82.2244	87.0354	85.1764	85.2191	84.6925	85.4664	87.2684
			852.396	77.9604	85.2561	80.2078	84.8178	81.7151	82.1672	83.3927	83.0118	82.5461	87.632	86.6357	86.2753	82.8818	82.1456	87.0057	85.1405	85.1611	84.631	85.3868	87.2331
			852.878	77.8633	85.1987	80.123	84.7551	81.6078	82.1072	83.3608	82.9565	82.5125	87.6162	86.586	86.2626	82.8572	82.0784	86.9828	85.1025	85.1213	84.5885	85.3197	87.2001
			853.36	77.7795	85.139	80.0369	84.6977	81.5102	82.075	83.3199	82.9344	82.4809	87.6088	86.5394	86.2521	82.8444	82.0259	86.966	85.0646	85.1007	84.5655	85.265	87.1702
			853.842	77.7129	85.086	79.9504	84.651	81.4263	82.0677	83.2755	82.9412	82.4498	87.6091	86.5002	86.2458	82.8388	81.9881	86.9529	85.03	85.0966	84.5606	85.2219	87.1452
			854.324	77.6624	85.0461	79.8636	84.62	81.357	82.076	83.2329	82.9662	82.4179	87.6163	86.4719	86.2438	82.8364	81.9622	86.94	85.0009	85.1046	84.5714	85.1906	87.1282
			854.807	77.6223	85.0209	79.7764	84.6078	81.3017	82.0873	83.1952	82.9962	82.3842	87.6295	86.4564	86.2436	82.8347	81.9428	86.9241	84.9783	85.1198	84.5947	85.1727	87.1209
			855.289	77.5841	85.0069	79.6891	84.6142	81.2582	82.0904	83.1631	83.019	82.3473	87.6467	86.4535	86.2405	82.8317	81.9232	86.9027	84.9607	85.138	84.6265	85.1703	87.1223
			855.771	77.5391	84.9966	79.6029	84.6352	81.2233	82.0783	83.135	83.027	82.3057	87.6648	86.4601	86.2291	82.8252	81.8973	86.8747	84.9444	85.1561	84.6614	85.1838	87.128
			856.253	77.4809	84.9814	79.5195	84.6637	81.1937	82.0498	83.1078	83.0176	82.2577	87.6794	86.471	86.2045	82.8122	81.8599	86.8404	84.9257	85.1718	84.6935	85.2111	87.1308
			856.735	77.4067	84.9551	79.4406	84.6916	81.1652	82.0084	83.0776	82.9926	82.2025	87.6855	86.4794	86.1637	82.789	81.8084	86.8015	84.9021	85.1834	84.7163	85.2464	87.1236
			857.217	77.3176	84.9163	79.3666	84.7125	81.1332	81.9595	83.0408	82.9557	82.1405	87.6792	86.4793	86.1069	82.7529	81.7425	86.7604	84.8742	85.1894	84.725	85.2823	87.1029
			857.699	77.2163	84.8695	79.2959	84.7237	81.0932	81.9076	82.9945	82.9103	82.074	87.6585	86.467	86.0369	82.7038	81.6642	86.7198	84.8457	85.1888	84.7174	85.3115	87.07
			858.181	77.1063	84.8231	79.2248	84.7262	81.0423	81.8545	82.9373	82.8577	82.007	87.6249	86.4419	85.9586	82.645	81.5772	86.6821	84.8217	85.1816	84.6944	85.3291	87.0314
			858.663	76.9902	84.7869	79.1486	84.7237	80.9794	81.7991	82.8698	82.7977	81.9441	87.5823	86.4072	85.8774	82.5833	81.4859	86.649	84.8066	85.1682	84.6598	85.3337	86.9958
			859.146	76.8697	84.7675	79.0629	84.7198	80.9064	81.7396	82.7953	82.7294	81.8893	87.5372	86.3684	85.7984	82.5269	81.3945	86.6212	84.8023	85.1497	84.6184	85.3273	86.9709
			859.628	76.7462	84.7666	78.9657	84.716	80.8281	81.6751	82.719	82.6536	81.8446	87.496	86.3316	85.7246	82.4829	81.3065	86.5981	84.8067	85.1276	84.5752	85.3137	86.9603
			860.11	76.6216	84.7799	78.8582	84.711	80.7512	81.6075	82.6474	82.5735	81.8093	87.4642	86.3017	85.6575	82.455	81.2239	86.578	84.8156	85.1039	84.5342	85.2977	86.9622
			860.592	76.4989	84.7986	78.7446	84.7019	80.6823	81.5414	82.5871	82.4948	81.7803	87.4452	86.2811	85.5971	82.4425	81.1473	86.559	84.8234	85.0811	84.4989	85.2836	86.971
			861.074	76.3812	84.8126	78.631	84.6862	80.6261	81.4829	82.5429	82.4238	81.753	87.4397	86.2696	85.5424	82.441	81.0762	86.5387	84.8259	85.0624	84.472	85.2746	86.9799
			861.556	76.2711	84.8131	78.5233	84.6636	80.5836	81.4365	82.5157	82.3652	81.722	87.4453	86.2647	85.4923	82.4434	81.0092	86.5149	84.821	85.0505	84.4566	85.2727	86.9835
			862.038	76.169	84.7949	78.4252	84.6369	80.5516	81.4036	82.503	82.3203	81.6829	87.4579	86.2623	85.4458	82.4426	80.9447	86.4856	84.8085	85.0476	84.4546	85.2779	86.9795
			862.52	76.0734	84.7578	78.337	84.6104	80.5236	81.3814	82.4985	82.2861	81.6327	87.4717	86.2586	85.4022	82.433	80.8814	86.4489	84.7887	85.0537	84.4663	85.2881	86.9688
			863.003	75.981	84.7053	78.2564	84.588	80.4914	81.3637	82.4946	82.2571	81.5703	87.4812	86.2503	85.3611	82.4113	80.8183	86.403	84.7614	85.0659	84.4887	85.2988	86.9536
			863.485	75.8886	84.6432	78.1789	84.5711	80.4476	81.3432	82.4848	82.2264	81.4962	87.4815	86.2357	85.3221	82.3768	80.7551	86.3465	84.7252	85.0785	84.5153	85.3029	86.9356
			863.967	75.794	84.5782	78.1	84.5573	80.3873	81.3137	82.465	82.1891	81.4125	87.4701	86.2148	85.2846	82.3301	80.692	86.2793	84.6787	85.0841	84.5367	85.2927	86.9148
			864.449	75.6969	84.5162	78.0167	84.5425	80.3094	81.272	82.4346	82.1431	81.3225	87.4469	86.189	85.2472	82.2728	80.6289	86.2029	84.6218	85.0756	84.5433	85.262	86.8904
			864.931	75.5982	84.4615	77.928	84.522	80.2164	81.2181	82.3963	82.0893	81.2302	87.4146	86.1604	85.2084	82.2066	80.5654	86.121	84.557	85.0486	84.528	85.2083	86.8614
			865.413	75.4989	84.4163	77.835	84.4937	80.1135	81.1548	82.3539	82.0312	81.1402	87.3774	86.1313	85.1658	82.1333	80.5006	86.0387	84.4895	85.0019	84.4891	85.134	86.8279
			865.895	75.3991	84.3803	77.7396	84.4582	80.0073	81.0861	82.311	81.9724	81.0564	87.3396	86.1034	85.1167	82.0548	80.433	85.9617	84.4256	84.9386	84.4303	85.0466	86.7914
			866.377	75.2975	84.3507	77.644	84.4183	79.9034	81.0155	82.2688	81.9159	80.9819	87.3041	86.0762	85.0589	81.9721	80.3606	85.8942	84.3698	84.8637	84.3599	84.9557	86.754
			866.86	75.1916	84.3225	77.5499	84.3769	79.8062	80.9455	82.2261	81.8625	80.918	87.2715	86.0477	84.9909	81.8864	80.2819	85.838	84.3228	84.7824	84.2873	84.8704	86.7162
			867.342	75.079	84.2897	77.4572	84.3341	79.7176	80.877	82.1794	81.8119	80.8644	87.2395	86.0139	84.9127	81.7981	80.1954	85.7914	84.2808	84.699	84.2201	84.796	86.6767
			867.824	74.9579	84.2464	77.365	84.2868	79.6372	80.8099	82.1248	81.7623	80.8189	87.2045	85.9701	84.8258	81.7072	80.1	85.7499	84.2369	84.6151	84.1618	84.7333	86.6318
			868.306	74.8281	84.189	77.271	84.2297	79.5624	80.7434	82.0591	81.7121	80.7781	87.1628	85.9126	84.7331	81.6141	79.9952	85.7083	84.1836	84.5313	84.1112	84.6795	86.5772
			868.788	74.6904	84.1167	77.1721	84.1577	79.489	80.6767	81.9814	81.66	80.7379	87.1122	85.8398	84.638	81.5196	79.8812	85.6615	84.1164	84.4474	84.0636	84.6299	86.5106
			869.27	74.5459	84.0327	77.0649	84.069	79.4116	80.609	81.893	81.6046	80.694	87.0521	85.7532	84.5435	81.4251	79.7584	85.6067	84.0354	84.3636	84.013	84.5807	86.4332
			869.752	74.3958	83.9422	76.9462	83.9662	79.3247	80.54	81.7975	81.545	80.6421	86.9839	85.657	84.4517	81.3324	79.6282	85.5436	83.9452	84.2806	83.9536	84.53	86.35
			870.234	74.2413	83.8511	76.8145	83.8563	79.2233	80.47	81.699	81.4802	80.579	86.9096	85.5568	84.3633	81.2428	79.4931	85.4738	83.853	84.1991	83.8816	84.4777	86.2677
			870.717	74.0846	83.7637	76.6702	83.7479	79.1051	80.3996	81.6017	81.4095	80.5024	86.8305	85.4583	84.2781	81.1566	79.3567	85.3998	83.7649	84.1187	83.7956	84.4243	86.1924
			871.199	73.9293	83.6813	76.5163	83.6485	78.9708	80.3306	81.5087	81.333	80.412	86.7471	85.3656	84.1958	81.0728	79.2233	85.3236	83.6843	84.0382	83.696	84.3692	86.1264
			871.681	73.7809	83.6023	76.3582	83.5618	78.8244	80.2649	81.4218	81.2519	80.3094	86.6593	85.281	84.117	80.9896	79.0976	85.2464	83.6109	83.9555	83.585	84.3108	86.0675
			872.163	73.6453	83.5232	76.2023	83.4874	78.673	80.2046	81.3416	81.1687	80.1988	86.5677	85.2048	84.0437	80.9051	78.9832	85.1684	83.5414	83.87	83.4669	84.2466	86.01
			872.645	73.5273	83.441	76.0544	83.4219	78.5247	80.151	81.2678	81.086	80.0856	86.474	85.1366	83.9787	80.8184	78.8817	85.0899	83.4717	83.7827	83.3472	84.1756	85.9471
			873.127	73.4282	83.3549	75.9182	83.3606	78.3871	80.104	81.1994	81.0062	79.9759	86.3818	85.0764	83.9246	80.7302	78.792	85.0114	83.3992	83.6977	83.2324	84.099	85.8741
			873.609	73.3448	83.2666	75.7946	83.2998	78.265	80.0622	81.1354	80.9306	79.8745	86.2957	85.0241	83.8824	80.6423	78.7102	84.9341	83.323	83.6202	83.1289	84.0206	85.7901
			874.091	73.2699	83.18	75.6821	83.2371	78.1598	80.0229	81.0747	80.8583	79.7837	86.2192	84.9799	83.8508	80.5567	78.6312	84.8595	83.2436	83.5552	83.0406	83.945	85.6979
			874.573	73.1945	83.0993	75.5782	83.1711	78.0698	79.9829	81.0161	80.7879	79.7025	86.1538	84.9427	83.8253	80.4746	78.55	84.7887	83.1615	83.5042	82.9684	83.8758	85.6025
			875.056	73.1104	83.0265	75.4806	83.1003	77.9914	79.9398	80.9588	80.7176	79.6271	86.0977	84.9095	83.7998	80.3949	78.4631	84.7215	83.0759	83.4646	82.9089	83.8129	85.5087
			875.538	73.0122	82.9606	75.3888	83.0221	77.9204	79.8919	80.9022	80.6468	79.552	86.0467	84.8753	83.7672	80.3146	78.3695	84.6569	82.9843	83.4291	82.8559	83.7522	85.4191
			876.02	72.8987	82.8971	75.3034	82.9334	77.853	79.8385	80.8457	80.5762	79.4716	85.9955	84.8334	83.7216	80.2291	78.2705	84.5927	82.8834	83.3879	82.8016	83.6865	85.3333
			876.502	72.7722	82.8295	75.225	82.8314	77.7865	79.7797	80.7887	80.5078	79.3818	85.9397	84.7779	83.6597	80.134	78.1684	84.5268	82.7714	83.3317	82.7394	83.6084	85.2489
			876.984	72.6366	82.7517	75.1527	82.7156	77.7181	79.7156	80.7307	80.4433	79.2806	85.877	84.7049	83.5812	80.0258	78.0652	84.458	82.6489	83.2536	82.665	83.5126	85.1631
			877.466	72.4961	82.66	75.0826	82.5884	77.6452	79.6464	80.6712	80.3831	79.1684	85.808	84.6146	83.489	79.9035	77.9619	84.3863	82.5202	83.1512	82.5772	83.3981	85.0737
			877.948	72.3543	82.5549	75.0088	82.4548	77.5647	79.5726	80.6099	80.3252	79.0473	85.7349	84.5112	83.3882	79.7679	77.8582	84.3124	82.3916	83.026	82.4771	83.2677	84.9799
			878.431	72.2142	82.441	74.9245	82.3209	77.4731	79.4954	80.5465	80.2658	78.9206	85.6608	84.4015	83.2845	79.622	77.7532	84.2378	82.2701	82.8825	82.3667	83.1265	84.882
			878.913	72.0786	82.3253	74.8246	82.1918	77.3683	79.4173	80.4809	80.2	78.7916	85.588	84.2931	83.1834	79.4697	77.6463	84.1636	82.1608	82.7263	82.2479	82.9798	84.7802
			879.395	71.9506	82.2154	74.7079	82.0696	77.2498	79.3418	80.4124	80.1239	78.6639	85.5173	84.1916	83.0889	79.3153	77.5388	84.0904	82.0653	82.5631	82.1218	82.8315	84.6741
			879.877	71.8331	82.1163	74.5772	81.9531	77.1197	79.2724	80.3406	80.0361	78.5403	85.4481	84.0994	83.0033	79.1635	77.4328	84.0182	81.9813	82.3983	81.9893	82.6837	84.563
			880.359	71.7273	82.0293	74.439	81.8387	76.9822	79.2115	80.2644	79.9382	78.423	85.3791	84.0151	82.9266	79.0181	77.3311	83.9465	81.9031	82.2364	81.8521	82.5374	84.4462
			880.841	71.632	81.9508	74.3008	81.7217	76.8427	79.1593	80.1829	79.8348	78.3126	85.3085	83.9346	82.8572	78.8823	77.2353	83.8746	81.824	82.081	81.7127	82.3935	84.3246
			881.323	71.543	81.8739	74.1688	81.5987	76.706	79.1133	80.0952	79.7318	78.2077	85.2346	83.8529	82.7921	78.7571	77.1448	83.8012	81.7369	81.9338	81.5743	82.2529	84.2006
			881.805	71.4546	81.79	74.0457	81.4678	76.5753	79.0688	80.0017	79.6344	78.1047	85.1556	83.766	82.7279	78.6408	77.057	83.7248	81.6364	81.7941	81.439	82.1166	84.0777
			882.288	71.3614	81.6922	73.9309	81.3294	76.4516	79.021	79.9032	79.5459	77.9989	85.0699	83.6722	82.6609	78.5293	76.9672	83.6431	81.5192	81.6576	81.3072	81.984	83.9593
			882.77	71.2609	81.5768	73.8204	81.1854	76.3341	78.9657	79.8018	79.4668	77.8851	84.9756	83.5726	82.5886	78.4162	76.8712	83.5538	81.3842	81.518	81.1765	81.8528	83.847
			883.252	71.1543	81.445	73.7091	81.0377	76.221	78.9013	79.6992	79.3948	77.7597	84.8719	83.4699	82.5095	78.2945	76.7657	83.455	81.232	81.3685	81.0429	81.7185	83.7397
			883.734	71.0455	81.3018	73.5922	80.8884	76.1103	78.8289	79.5968	79.3259	77.6216	84.7593	83.3676	82.4236	78.1584	76.65	83.3458	81.0653	81.204	80.9022	81.5764	83.6334
			884.216	70.9396	81.1547	73.4654	80.7393	75.9999	78.7509	79.4946	79.2554	77.4719	84.6402	83.268	82.3316	78.0051	76.5251	83.2277	80.8882	81.0238	80.7517	81.4221	83.5228
			884.698	70.8393	81.0109	73.326	80.5922	75.8878	78.6702	79.3916	79.1791	77.3136	84.5182	83.1718	82.2356	77.8351	76.3931	83.1041	80.7062	80.8317	80.5914	81.2541	83.4028
			885.18	70.7439	80.8749	73.1725	80.4493	75.7714	78.5889	79.2866	79.0943	77.1497	84.3973	83.0776	82.1379	77.652	76.2557	82.9798	80.5252	80.6349	80.4242	81.0737	83.2708
			885.662	70.6491	80.7478	73.0051	80.3132	75.6482	78.5072	79.179	78.9998	76.9823	84.2803	82.9828	82.0413	77.4607	76.114	82.8595	80.351	80.4412	80.254	80.8842	83.1276
			886.144	70.5488	80.627	72.826	80.1859	75.5155	78.4244	79.0698	78.8967	76.8118	84.1677	82.8849	81.949	77.2661	75.9684	82.7466	80.1881	80.2562	80.0848	80.69	82.9772
			886.627	70.4382	80.5084	72.6397	80.0687	75.3724	78.3392	78.9621	78.7876	76.6384	84.0576	82.7822	81.8637	77.0713	75.8194	82.6421	80.0391	80.0819	79.9189	80.4944	82.8261
			887.109	70.3153	80.3881	72.4533	79.9614	75.2201	78.2515	78.8602	78.6769	76.4631	83.9469	82.6746	81.7879	76.8784	75.6686	82.5449	79.9048	79.9165	79.7574	80.3001	82.6808
			887.591	70.1823	80.2645	72.275	79.8624	75.0622	78.1629	78.7678	78.5692	76.2892	83.8333	82.5641	81.7226	76.6884	75.5194	82.4526	79.7844	79.7572	79.6003	80.1095	82.5465
			888.073	70.0435	80.1388	72.1125	79.7687	74.9047	78.076	78.6869	78.4695	76.1223	83.717	82.4536	81.6667	76.5031	75.3764	82.3633	79.6761	79.6019	79.4483	79.9263	82.4262
			888.555	69.9037	80.0143	71.9708	79.6774	74.7541	77.9941	78.6164	78.3812	75.9694	83.6018	82.3469	81.6173	76.3253	75.2443	82.2763	79.5786	79.4518	79.3029	79.7557	82.3199
			889.037	69.7662	79.895	71.8503	79.5861	74.6155	77.9199	78.5531	78.3057	75.8364	83.4941	82.2475	81.5697	76.1595	75.1266	82.1929	79.4912	79.3113	79.1667	79.6042	82.2259
			889.519	69.6322	79.7843	71.7475	79.4941	74.492	77.8545	78.4926	78.2419	75.726	83.4014	82.1586	81.519	76.0104	75.0246	82.1157	79.4144	79.1867	79.0421	79.4784	82.1418
			890.001	69.5016	79.6839	71.6561	79.4023	74.3836	77.7973	78.4317	78.1864	75.6371	83.3302	82.083	81.4614	75.8824	74.9375	82.0475	79.3493	79.0838	78.931	79.3825	82.0662
			890.484	69.3743	79.5942	71.5697	79.3136	74.2888	77.7464	78.3699	78.1345	75.5652	83.2838	82.0229	81.396	75.7783	74.863	81.9904	79.2968	79.0061	78.8342	79.3166	81.9996
			890.966	69.2515	79.5153	71.4844	79.2316	74.2053	77.6995	78.3093	78.0812	75.5044	83.2619	81.9798	81.3245	75.6991	74.7984	81.9448	79.2569	78.9538	78.7519	79.2772	81.9442
			891.448	69.1351	79.4478	71.3996	79.1609	74.1314	77.6545	78.2542	78.0227	75.4497	83.2607	81.9547	81.2508	75.6437	74.7416	81.9096	79.228	78.9244	78.6853	79.2577	81.9035
			891.93	69.0265	79.3936	71.3174	79.1055	74.0664	77.61	78.2083	77.9573	75.3984	83.2742	81.9471	81.1799	75.6099	74.6908	81.8826	79.2071	78.9137	78.6365	79.251	81.8802
			892.412	68.9252	79.3555	71.2413	79.068	74.0102	77.5656	78.1732	77.8856	75.3505	83.296	81.955	81.1155	75.5944	74.6445	81.8614	79.1904	78.9181	78.6088	79.252	81.8751
			892.894	68.8276	79.3362	71.1733	79.0495	73.9621	77.5215	78.1476	77.8104	75.3074	83.3199	81.9745	81.0596	75.5933	74.6006	81.8438	79.1746	78.9344	78.6047	79.2585	81.8865
			893.376	68.7285	79.3365	71.1137	79.0489	73.9205	77.4782	78.1274	77.7359	75.2701	83.3412	82.0009	81.0118	75.6026	74.5562	81.8282	79.158	78.9602	78.6244	79.2712	81.9097
			893.859	68.6228	79.3549	71.06	79.063	73.882	77.4356	78.1074	77.6664	75.2377	83.3564	82.029	80.9701	75.6177	74.5079	81.8131	79.1407	78.993	78.6636	79.2915	81.939
			894.341	68.5082	79.3868	71.0083	79.0875	73.8422	77.3931	78.083	77.6048	75.2071	83.3632	82.0545	80.932	75.6334	74.4525	81.7967	79.1247	79.0289	78.7135	79.3197	81.9685
			894.823	68.3864	79.4255	70.9548	79.1175	73.7965	77.3487	78.0512	77.5519	75.1736	83.3604	82.0742	80.8959	75.6447	74.3875	81.7763	79.1129	79.0629	78.7624	79.353	81.9944
			895.305	68.2624	79.4627	70.8962	79.1484	73.7413	77.2994	78.0112	77.5055	75.1327	83.3481	82.0861	80.8606	75.6467	74.3117	81.749	79.1073	79.0899	78.7985	79.3859	82.0148
			895.787	68.1423	79.4904	70.8302	79.1762	73.6745	77.2415	77.9631	77.4616	75.0815	83.3273	82.0892	80.8251	75.6359	74.2255	81.712	79.1082	79.1055	78.8132	79.4111	82.0294
			896.269	68.0302	79.5016	70.7545	79.1976	73.5955	77.1716	77.9076	77.4146	75.0198	83.3008	82.0827	80.7877	75.6104	74.13	81.6637	79.1132	79.1081	78.8033	79.4217	82.0383
			896.751	67.9259	79.4917	70.6668	79.2096	73.5054	77.0876	77.8453	77.3596	74.9489	83.2715	82.0656	80.7457	75.57	74.0268	81.6045	79.1176	79.0986	78.7716	79.4137	82.0406
			897.233	67.8253	79.4587	70.5642	79.2093	73.4058	76.99	77.7765	77.2937	74.8713	83.2425	82.0366	80.6955	75.5163	73.9172	81.5369	79.1149	79.0798	78.7245	79.386	82.0334
			897.716	67.7222	79.4031	70.4445	79.1929	73.2984	76.8818	77.7022	77.2167	74.7885	83.2152	81.9944	80.634	75.4512	73.802	81.4643	79.0984	79.0542	78.6691	79.3408	82.0122
			898.198	67.611	79.3279	70.3062	79.1571	73.1846	76.7685	77.6242	77.1311	74.7005	83.1893	81.9387	80.5594	75.3765	73.6817	81.3905	79.0626	79.0228	78.61	79.2815	81.9727
			898.68	67.4889	79.2379	70.1508	79.099	73.065	76.6563	77.5449	77.0412	74.6059	83.1624	81.8702	80.4726	75.2929	73.5559	81.3177	79.0037	78.9834	78.5477	79.211	81.9122
			899.162	67.3566	79.1386	69.9814	79.0181	72.9392	76.5505	77.4663	76.9511	74.5022	83.1305	81.7909	80.3767	75.2	73.4243	81.2461	78.9204	78.9312	78.4788	79.1312	81.8314
			899.644	67.2162	79.035	69.8028	78.9162	72.806	76.4539	77.3889	76.8632	74.3871	83.0891	81.7037	80.2755	75.0963	73.2857	81.1738	78.8133	78.8604	78.398	79.0422	81.7348
			900.126	67.0692	78.9303	69.6192	78.7978	72.6634	76.3661	77.3105	76.778	74.2586	83.0343	81.6117	80.1722	74.9798	73.1384	81.0972	78.6842	78.7663	78.3005	78.9432	81.6296
			900.608	66.9146	78.8249	69.433	78.6683	72.5091	76.2835	77.2265	76.6936	74.1157	82.9631	81.5166	80.0675	74.8484	72.9805	81.0121	78.5361	78.6468	78.1843	78.8328	81.523
			901.09	66.7485	78.7161	69.2439	78.5327	72.3407	76.2014	77.1314	76.6071	73.9577	82.8743	81.419	79.9592	74.7	72.8103	80.915	78.3717	78.5028	78.0502	78.7095	81.4198
			901.572	66.5665	78.599	69.0503	78.3931	72.1574	76.1155	77.0209	76.516	73.784	82.7679	81.3175	79.8434	74.5333	72.6269	80.8043	78.1943	78.3383	77.9017	78.5721	81.3214
			902.055	66.3657	78.4684	68.8499	78.2488	71.9599	76.0233	76.8942	76.4192	73.5949	82.6451	81.2104	79.7159	74.3473	72.4311	80.6797	78.0071	78.1584	77.7431	78.4194	81.2245
			902.537	66.1469	78.32	68.6424	78.0965	71.751	75.9253	76.7543	76.317	73.3916	82.5086	81.0955	79.5749	74.1422	72.2253	80.5428	77.813	77.9685	77.5782	78.2502	81.1233
			903.019	65.9151	78.1527	68.4293	77.932	71.5349	75.8239	76.6079	76.2106	73.1769	82.362	80.9715	79.4215	73.9193	72.0128	80.3964	77.615	77.773	77.4093	78.064	81.011
			903.501	65.6774	77.9685	68.2141	77.7527	71.3164	75.7225	76.4626	76.101	72.9552	82.2099	80.8383	79.2595	73.6809	71.7969	80.2433	77.4146	77.5744	77.2369	77.8611	80.8819
			903.983	65.4405	77.7717	68.0002	77.5585	71.0988	75.6235	76.3248	75.9881	72.7313	82.0566	80.696	79.0942	73.4303	71.5797	80.086	77.2115	77.3737	77.0597	77.6428	80.7318
			904.465	65.208	77.5672	67.7892	77.3517	70.8834	75.5283	76.197	75.8705	72.5084	81.9054	80.5447	78.9297	73.1706	71.3615	79.9258	77.0034	77.1694	76.8748	77.4113	80.559
			904.947	64.9795	77.3584	67.5797	77.1363	70.6686	75.436	76.078	75.7459	72.287	81.7571	80.3841	78.768	72.9044	71.1412	79.7627	76.7861	76.9582	76.6786	77.1684	80.3628
			905.429	64.7524	77.146	67.3673	76.915	70.451	75.3446	75.9628	75.6124	72.0632	81.6097	80.2131	78.608	72.6325	70.9168	79.5953	76.5549	76.7352	76.4665	76.9147	80.1434
			905.912	64.5232	76.9274	67.1462	76.6883	70.226	75.2514	75.8453	75.469	71.8298	81.458	80.0301	78.4463	72.354	70.687	79.4213	76.3054	76.4944	76.2341	76.6488	79.9013
			906.394	64.2907	76.6983	66.9107	76.4532	69.9896	75.1532	75.7194	75.3162	71.5781	81.2949	79.8342	78.2788	72.066	70.4507	79.2375	76.035	76.2295	75.9775	76.3669	79.6376
			906.876	64.056	76.4535	66.657	76.2038	69.7388	75.047	75.5803	75.1549	71.3003	81.1131	79.6251	78.1021	71.7638	70.2073	79.041	75.7425	75.9353	75.6943	76.0639	79.3546
			907.358	63.8216	76.1891	66.3838	75.9331	69.4719	74.9296	75.4245	74.9857	70.992	80.906	79.4038	77.9143	71.4421	69.9556	78.829	75.428	75.6083	75.3837	75.7338	79.0553
			907.84	63.59	75.9027	66.0924	75.6347	69.1875	74.7989	75.2497	74.8083	70.6529	80.6696	79.1715	77.715	71.0949	69.6924	78.5996	75.0915	75.2469	75.0464	75.3714	78.7424
			908.322	63.3612	75.5938	65.7856	75.3042	68.885	74.654	75.0545	74.6215	70.2869	80.4017	78.929	77.5045	70.7166	69.4132	78.3521	74.732	74.8508	74.6829	74.9727	78.4172
			908.804	63.1335	75.2629	65.4669	74.9394	68.5636	74.4972	74.8386	74.4241	69.8997	80.1025	78.6758	77.283	70.3028	69.113	78.0867	74.3474	74.4206	74.293	74.5353	78.0785
			909.287	62.9037	74.911	65.1404	74.54	68.2232	74.3336	74.6031	74.2159	69.4974	79.7733	78.4097	77.0506	69.8509	68.7885	77.8048	73.9346	73.9567	73.8748	74.058	77.7217
			909.769	62.6701	74.5385	64.81	74.1063	67.8648	74.171	74.3519	73.9989	69.0839	79.4162	78.1268	76.8068	69.3605	68.4399	77.5083	73.4906	73.459	73.4246	73.5409	77.3401
			910.251	62.4327	74.145	64.4791	73.6392	67.4911	74.018	74.0904	73.7766	68.6609	79.0338	77.8229	76.5514	68.8337	68.0717	77.1993	73.0139	72.9268	72.9383	72.9853	76.9269
			910.733	62.1936	73.7295	64.1498	73.1393	67.106	73.8815	73.8254	73.5535	68.2273	78.6294	77.4939	76.2846	68.2741	67.6916	76.8794	72.5041	72.3593	72.4126	72.3933	76.4772
			911.215	61.9555	73.2903	63.8223	72.6071	66.7137	73.764	73.563	73.3327	67.7801	78.2066	77.1375	76.0071	67.686	67.3083	76.5491	71.9625	71.7557	71.846	71.7673	75.9887
			911.697	61.7191	72.8253	63.4939	72.0431	66.3176	73.6625	73.3068	73.1142	67.3149	77.7684	76.7526	75.7197	67.0723	66.9275	76.2072	71.3905	71.1144	71.2387	71.1096	75.4624
			912.179	61.4823	72.332	63.1594	71.4483	65.9189	73.5696	73.0571	72.8953	66.827	77.317	76.3399	75.4227	66.4336	66.5507	75.8517	70.7896	70.4337	70.5921	70.4215	74.9004
			912.661	61.2408	71.8085	62.8124	70.8236	65.5164	73.4756	72.8118	72.6708	66.312	76.8524	75.9017	75.1164	65.7679	66.1749	75.4796	70.1614	69.7111	69.9074	69.7021	74.3055
			913.144	60.9908	71.2545	62.448	70.1705	65.1082	73.3725	72.5672	72.4358	65.7674	76.3733	75.4416	74.8015	65.072	65.7947	75.0893	69.5092	68.9454	69.1855	68.9498	73.6796
			913.626	60.7311	70.6722	62.065	69.4917	64.6927	73.2567	72.3209	72.1882	65.194	75.8782	74.9649	74.4794	64.3432	65.406	74.681	68.8391	68.138	68.4279	68.1635	73.0253
			914.108	60.4655	70.0678	61.6674	68.7921	64.2705	73.1299	72.0722	71.9301	64.5968	75.3672	74.4789	74.1538	63.5828	65.0092	74.258	68.162	67.2959	67.6386	67.3457	72.3477
			914.59	60.202	69.4518	61.2641	68.08	63.8452	72.9982	71.8235	71.668	63.9859	74.8447	73.9932	73.8301	62.7976	64.6108	73.8263	67.4936	66.4331	66.8267	66.5049	71.6562
			915.072	59.9504	68.8386	60.8669	67.3689	63.4235	72.8695	71.5789	71.4116	63.376	74.3203	73.5197	73.5156	62.0008	64.2224	73.3942	66.8537	65.5712	66.0077	65.6574	70.9668
			915.554	59.7195	68.2455	60.4877	66.6768	63.0141	72.7503	71.3437	71.1711	62.7843	73.8087	73.0719	73.2184	61.2114	63.8589	72.9708	66.264	64.7369	65.2035	64.827	70.3007
			916.036	59.5149	67.6912	60.137	66.0266	62.6275	72.6443	71.124	70.9559	62.2289	73.3286	72.6642	72.9467	60.4528	63.5353	72.5651	65.7465	63.9595	64.4404	64.0428	69.6835
			916.518	59.339	67.195	59.8227	65.4442	62.2756	72.5526	70.9269	70.7738	61.727	72.9009	72.311	72.709	59.7515	63.2643	72.1858	65.3217	63.2673	63.7467	63.3366	69.1414
			917	59.1932	66.7757	59.5514	64.9565	61.9717	72.475	70.7617	70.6311	61.2944	72.5463	72.0265	72.5139	59.1353	63.0564	71.8419	65.008	62.6857	63.1501	62.7398	68.6993
			917.483	59.0805	66.4519	59.3298	64.5887	61.7306	72.4123	70.6392	70.5336	60.9452	72.2839	71.8236	72.3703	58.6325	62.9194	71.5436	64.8204	62.2365	62.6759	62.2812	68.3786
			917.965	59.0063	66.2401	59.1656	64.3612	61.567	72.3677	70.571	70.4866	60.6921	72.1296	71.713	72.2867	58.27	62.8594	71.3021	64.769	61.9371	62.3459	61.9843	68.1954
			918.447	58.978	66.153	59.0668	64.2862	61.4934	72.3461	70.5665	70.494	60.5457	72.0945	71.7016	72.2696	58.0693	62.8795	71.1295	64.8569	61.8002	62.176	61.8654	68.159
			918.929	59.0013	66.1959	59.039	64.3654	61.5163	72.3524	70.6293	70.5567	60.5127	72.1829	71.7899	72.3208	58.043	62.9785	71.0357	65.0781	61.8315	62.1748	61.931	68.2701
			919.411	59.0775	66.3648	59.0834	64.5887	61.6335	72.3893	70.7546	70.6713	60.5943	72.3904	71.9711	72.4362	58.1903	63.1497	71.0263	65.4176	62.0281	62.3411	62.176	68.5197
			919.893	59.2012	66.6452	59.1951	64.936	61.8341	72.4559	70.9302	70.8298	60.7844	72.7039	72.2314	72.6051	58.4966	63.3803	71.1007	65.8528	62.377	62.6631	62.5832	68.8894
			920.375	59.3619	67.0149	59.3641	65.3808	62.1004	72.5478	71.1384	71.0207	61.0707	73.1024	72.5526	72.8133	58.9351	63.6537	71.2517	66.3571	62.8562	63.119	63.1258	69.3538
			920.857	59.5471	67.4482	59.5777	65.8957	62.4121	72.6582	71.3619	71.2322	61.4361	73.5603	72.9152	73.0459	59.4723	63.9522	71.4675	66.9046	63.4373	63.6802	63.7705	69.8838
			921.34	59.7463	67.9204	59.8234	66.4556	62.7508	72.7799	71.5875	71.454	61.8614	74.0507	73.3023	73.2914	60.074	64.2607	71.7335	67.4727	64.089	64.3148	64.4819	70.4515
			921.822	59.9538	68.4115	60.0911	67.0405	63.1025	72.907	71.8087	71.6791	62.3276	74.5486	73.7015	73.5432	60.7098	64.5688	72.0352	68.0441	64.7808	64.9913	65.226	71.0332
			922.304	60.1673	68.9071	60.3726	67.635	63.4579	73.0344	72.0249	71.9031	62.8168	75.0338	74.1043	73.7998	61.3555	64.8701	72.3589	68.6061	65.4851	65.6813	65.9726	71.6105
			922.786	60.3861	69.3976	60.661	68.2263	63.8103	73.158	72.2378	72.1225	63.3121	75.4917	74.5052	74.0615	61.9928	65.1611	72.6927	69.1492	66.1783	66.3614	66.6965	72.1707
			923.268	60.6065	69.8754	60.9482	68.8028	64.1535	73.2733	72.4481	72.3332	63.7979	75.9137	74.8985	74.3278	62.6074	65.4384	73.0254	69.6654	66.8412	67.0129	67.3778	72.7045
			923.75	60.8203	70.3331	61.225	69.3527	64.4801	73.3749	72.6525	72.5296	64.2592	76.2959	75.2773	74.5951	63.1878	65.6968	73.3472	70.1468	67.4589	67.6224	68.0027	73.2047
			924.232	61.0154	70.763	61.4815	69.865	64.7819	73.4576	72.8442	72.7049	64.6828	76.6379	75.6327	74.8556	63.724	65.93	73.6494	70.5855	68.0211	68.1809	68.5631	73.6643
			924.715	61.1789	71.157	61.7095	70.3304	65.0509	73.517	73.0147	72.8529	65.0585	76.941	75.9556	75.0994	64.2085	66.1315	73.9253	70.9743	68.5219	68.6826	69.0564	74.0771
			925.197	61.3016	71.5093	61.9042	70.743	65.2821	73.5516	73.1576	72.9699	65.3806	77.2072	76.2384	75.3171	64.6369	66.2968	74.1706	71.3077	68.9598	69.1249	69.4841	74.4379
			925.679	61.3811	71.8167	62.0656	71.1009	65.4744	73.5628	73.2708	73.0561	65.6484	77.4384	76.4767	75.502	65.0087	66.4256	74.384	71.583	69.3378	69.5075	69.8513	74.7442
			926.161	61.4223	72.08	62.1973	71.4055	65.6302	73.5554	73.3575	73.1151	65.8666	77.6365	76.671	75.6517	65.327	66.5213	74.5667	71.8008	69.6621	69.8321	70.1643	74.9974
			926.643	61.4353	72.3022	62.3041	71.6604	65.7544	73.536	73.4239	73.153	66.0436	77.804	76.8252	75.7675	65.5972	66.5899	74.7217	71.9647	69.9407	70.1028	70.43	75.2024
			927.125	61.4308	72.4872	62.3901	71.8697	65.8517	73.5114	73.4766	73.1757	66.1893	77.9435	76.9458	75.8529	65.8254	66.6379	74.8528	72.0805	70.1813	70.3249	70.6543	75.3667
			927.607	61.4165	72.6373	62.4562	72.0365	65.9252	73.4877	73.5197	73.1879	66.3123	78.0584	77.0391	75.9111	66.0159	66.6699	74.963	72.1548	70.3893	70.505	70.8412	75.498
			928.089	61.3951	72.7525	62.5014	72.1626	65.9759	73.4686	73.5537	73.1916	66.4183	78.1515	77.1095	75.9444	66.1711	66.6881	75.0547	72.1942	70.5666	70.6493	70.9927	75.6026
			928.572	61.3652	72.8304	62.5236	72.2489	66.0035	73.4565	73.5761	73.1868	66.5084	78.2247	77.1589	75.9536	66.2911	66.6922	75.1287	72.2044	70.7117	70.7628	71.109	75.6835
			929.054	61.3236	72.8683	62.5221	72.2966	66.0082	73.4515	73.5835	73.1726	66.5802	78.2785	77.187	75.9397	66.3757	66.6817	75.1854	72.1903	70.8209	70.8492	71.1893	75.7406
			929.536	61.2685	72.8651	62.4991	72.3084	65.992	73.4521	73.574	73.148	66.629	78.3119	77.1929	75.9045	66.4254	66.6565	75.2248	72.1562	70.8907	70.9106	71.2336	75.7722
			930.018	61.2004	72.8238	62.4598	72.289	65.9584	73.4551	73.5479	73.1129	66.65	78.3236	77.1769	75.8521	66.4425	66.6182	75.2469	72.1062	70.9198	70.9484	71.243	75.7773
			930.5	61.123	72.7513	62.4101	72.2452	65.9121	73.4554	73.5074	73.068	66.6402	78.3125	77.141	75.7883	66.4313	66.5693	75.2519	72.044	70.9107	70.9642	71.2211	75.7565
			930.982	61.0403	72.6579	62.3548	72.1845	65.8569	73.4464	73.4554	73.0139	66.5998	78.2793	77.0898	75.7192	66.3969	66.5119	75.2401	71.9726	70.8695	70.9598	71.1733	75.7136
			931.464	60.956	72.5552	62.2963	72.1141	65.7942	73.4217	73.3936	72.9513	66.5322	78.2267	77.029	75.6495	66.3441	66.4471	75.2118	71.8947	70.8042	70.938	71.106	75.6544
			931.946	60.8722	72.453	62.2337	72.0393	65.7231	73.3765	73.3223	72.8804	66.4434	78.1591	76.9642	75.5816	66.2762	66.3741	75.1674	71.8119	70.7228	70.9013	71.0254	75.5857
			932.428	60.7897	72.3581	62.1648	71.9631	65.6415	73.3093	73.2403	72.8015	66.3409	78.0819	76.8996	75.5155	66.1951	66.2917	75.1081	71.7254	70.6315	70.8516	70.936	75.513
			932.911	60.7094	72.2737	62.0879	71.8862	65.5476	73.2228	73.1473	72.7156	66.2319	78	76.8368	75.4497	66.1018	66.1994	75.0358	71.6359	70.5332	70.7902	70.8408	75.4397
			933.393	60.633	72.1994	62.0032	71.8078	65.4416	73.1228	73.0445	72.6242	66.1221	77.9173	76.7755	75.3829	65.9979	66.0986	74.9534	71.5437	70.4287	70.7174	70.7409	75.3668
			933.875	60.5626	72.1325	61.9135	71.7259	65.3259	73.0167	72.9352	72.5291	66.0151	77.8358	76.7132	75.3148	65.886	65.9927	74.8649	71.449	70.3173	70.6336	70.6368	75.293
			934.357	60.4992	72.069	61.8221	71.6382	65.2045	72.9105	72.8243	72.4316	65.9112	77.7555	76.6467	75.2464	65.7695	65.8861	74.7741	71.3514	70.198	70.5388	70.5292	75.2159
			934.839	60.4411	72.0041	61.7317	71.5426	65.0813	72.8074	72.7162	72.332	65.8087	77.675	76.5728	75.1789	65.6515	65.7825	74.6841	71.2496	70.0708	70.4337	70.4189	75.1325
			935.321	60.3833	71.933	61.6424	71.4373	64.9589	72.7071	72.6141	72.2298	65.7037	77.5916	76.4894	75.1129	65.5335	65.6834	74.5963	71.1422	69.9358	70.3187	70.3068	75.0402
			935.803	60.319	71.8512	61.552	71.321	64.838	72.6073	72.5185	72.1239	65.5922	77.5028	76.3957	75.0476	65.4144	65.5871	74.5104	71.0275	69.7937	70.1937	70.193	74.9372
			936.285	60.2416	71.7555	61.4575	71.1937	64.7184	72.5055	72.4287	72.0141	65.4713	77.4064	76.2926	74.9812	65.291	65.4903	74.4242	70.9048	69.6446	70.0584	70.076	74.8226
			936.768	60.1483	71.645	61.3565	71.0566	64.5999	72.4015	72.3433	71.9019	65.3406	77.3017	76.1826	74.9117	65.1591	65.3888	74.3355	70.7746	69.4889	69.9119	69.9528	74.6966
			937.25	60.041	71.5209	61.2487	70.9118	64.4836	72.2977	72.2615	71.7905	65.2022	77.1896	76.0692	74.8382	65.0153	65.28	74.2421	70.6384	69.3275	69.754	69.8194	74.5606
			937.732	59.9258	71.387	61.136	70.7616	64.3718	72.1987	72.183	71.6839	65.0604	77.0727	75.9562	74.761	64.8581	65.1629	74.1432	70.4989	69.1626	69.5856	69.672	74.4171
			938.214	59.8103	71.2481	61.0208	70.6078	64.267	72.1086	72.1075	71.5852	64.9196	76.9544	75.847	74.6812	64.6885	65.0381	74.0387	70.358	68.9975	69.4093	69.5084	74.2684
			938.696	59.7007	71.1087	60.9046	70.4507	64.17	72.0293	72.0331	71.4951	64.7829	76.838	75.743	74.6	64.5094	64.9074	73.9295	70.217	68.8361	69.229	69.329	74.1162
			939.178	59.5988	70.9714	60.7866	70.2885	64.0788	71.9593	71.9564	71.4111	64.6504	76.7256	75.644	74.5171	64.3238	64.7724	73.8165	70.0749	68.681	69.0486	69.137	73.9606
			939.66	59.502	70.8359	60.6642	70.1186	63.9888	71.8939	71.8722	71.3283	64.5196	76.6175	75.5478	74.4304	64.1342	64.6341	73.7003	69.9294	68.5323	68.871	68.9377	73.8002
			940.143	59.4052	70.6993	60.5347	69.9383	63.8935	71.8279	71.7758	71.2412	64.386	76.5115	75.4508	74.3364	63.9417	64.4941	73.5813	69.7775	68.3865	68.697	68.7373	73.6327
			940.625	59.3038	70.5575	60.3966	69.747	63.7869	71.7572	71.6648	71.1456	64.2449	76.404	75.3489	74.2321	63.7463	64.3542	73.4597	69.6158	68.2372	68.5247	68.5408	73.4561
			941.107	59.1957	70.4062	60.2509	69.5462	63.6645	71.6808	71.5396	71.0396	64.0934	76.2907	75.2388	74.1158	63.5471	64.2172	73.336	69.4418	68.0763	68.3506	68.3514	73.2699
			941.589	59.0817	70.2428	60.1005	69.3397	63.5247	71.6002	71.4037	70.9236	63.9309	76.1675	75.118	73.9883	63.3432	64.0854	73.2104	69.2537	67.8964	68.1705	68.1686	73.0755
			942.071	58.9641	70.0658	59.9481	69.1314	63.3674	71.518	71.2617	70.799	63.7585	76.0311	74.9851	73.853	63.1326	63.9597	73.0829	69.0504	67.6924	67.98	67.9882	72.8757
			942.553	58.8446	69.8744	59.7941	68.9233	63.1938	71.4359	71.1171	70.6668	63.5774	75.8795	74.8395	73.7137	62.9124	63.8376	72.9524	68.8308	67.462	67.7755	67.8025	72.6729
			943.035	58.7225	69.668	59.6354	68.7133	63.0047	71.353	70.9707	70.5268	63.3876	75.7111	74.6808	73.5735	62.6777	63.7128	72.8164	68.5942	67.2056	67.554	67.6014	72.4674
			943.517	58.5945	69.4449	59.4663	68.4953	62.8002	71.2658	70.8204	70.3771	63.1866	75.5243	74.5085	73.4328	62.4222	63.5765	72.6708	68.34	66.9244	67.3125	67.3742	72.2563
			944	58.4571	69.2028	59.2804	68.2602	62.5808	71.1693	70.6627	70.2158	62.9696	75.317	74.322	73.2898	62.139	63.4196	72.5107	68.0681	66.6196	67.0482	67.1112	72.0336
			944.482	58.3078	68.9392	59.0732	67.9987	62.3476	71.0592	70.4945	70.0421	62.7309	75.0871	74.1201	73.1402	61.8224	63.2353	72.3312	67.7786	66.2907	66.7579	66.8057	71.7917
			944.964	58.1469	68.6524	58.8435	67.7038	62.1027	70.9332	70.3146	69.8566	62.4654	74.8322	73.9015	72.9796	61.4695	63.021	72.1282	67.4714	65.9357	66.4387	66.4548	71.5232
			945.446	57.9772	68.342	58.5933	67.3723	61.8485	70.7918	70.1237	69.6614	62.1702	74.5509	73.6643	72.8035	61.0797	62.7786	71.8992	67.1452	65.5517	66.0883	66.0592	71.2227
			945.928	57.8015	68.0083	58.3256	67.0043	61.5861	70.6372	69.923	69.4584	61.8443	74.2428	73.4056	72.6089	60.6546	62.5122	71.643	66.7961	65.1352	65.7049	65.6217	70.887
			946.41	57.6205	67.6512	58.0415	66.6014	61.3133	70.472	69.7121	69.2482	61.4885	73.9082	73.1217	72.3933	60.1954	62.2265	71.3594	66.4178	64.6828	65.2873	65.1451	70.5144
			946.892	57.4314	67.269	57.739	66.1641	61.0246	70.2978	69.4877	69.0287	61.1037	73.5479	72.8085	72.1547	59.7011	61.9242	71.0489	66.0023	64.1913	64.8335	64.6303	70.1036
			947.374	57.2288	66.8583	57.4132	65.6901	60.7117	70.1149	69.2443	68.7963	60.69	73.1617	72.4625	71.8917	59.1679	61.6053	70.7123	65.5419	63.657	64.3408	64.0752	69.6527
			947.856	57.0071	66.4138	57.0587	65.1744	60.3663	69.9228	68.9762	68.5471	60.2459	72.7486	72.0823	71.6036	58.5897	61.2687	70.3509	65.0315	63.0759	63.8055	63.4749	69.1587
			948.339	56.7636	65.9308	56.6726	64.611	59.9828	69.721	68.6801	68.2788	59.7696	72.3064	71.6691	71.2912	57.9605	60.9135	69.9667	64.4707	62.4445	63.2233	62.8236	68.6191
			948.821	56.5002	65.4064	56.2567	63.9956	59.5605	69.5102	68.3578	67.9922	59.2596	71.8331	71.2273	70.9581	57.2775	60.541	69.5626	63.8643	61.7603	62.5917	62.1177	68.0338
			949.303	56.2227	64.8412	55.817	63.3282	59.1036	69.2925	68.016	67.691	58.716	71.3275	70.7637	70.6099	56.5425	60.1547	69.1425	63.221	61.0231	61.9106	61.3577	67.4059
			949.785	55.9384	64.2391	55.3624	62.614	58.6196	69.0705	67.6648	67.3806	58.141	70.7913	70.2854	70.2538	55.7623	59.7593	68.7109	62.5517	60.2359	61.1834	60.5496	66.7422
			950.267	55.6529	63.6068	54.9012	61.8628	58.117	68.8471	67.3142	67.0661	57.5391	70.2286	69.7988	69.8961	54.9469	59.3584	68.2718	61.8663	59.4046	60.4168	59.7037	66.0521
			950.749	55.3683	62.9521	54.4391	61.0871	57.6026	68.6244	66.9717	66.7513	56.916	69.6466	69.3078	69.5407	54.1074	58.9535	67.829	61.1736	58.5382	59.62	58.8331	65.345
			951.231	55.0833	62.2838	53.9793	60.2999	57.0819	68.4042	66.6411	66.4388	56.2794	69.0549	68.815	69.1888	53.2544	58.5445	67.3861	60.4817	57.6476	58.804	57.9509	64.6296
			951.713	54.7967	61.6116	53.5244	59.5146	56.5602	68.189	66.3236	66.131	55.6382	68.4649	68.3234	68.8398	52.3981	58.1315	66.9477	59.8003	56.7467	57.981	57.0703	63.9141
			952.196	54.5102	60.948	53.0804	58.7453	56.0454	67.9828	66.021	65.832	55.0044	67.8902	67.8394	68.4938	51.5507	57.7183	66.5206	59.1431	55.8526	57.1656	56.204	63.2084
			952.678	54.2309	60.3094	52.6581	58.0089	55.5504	67.7915	65.7383	65.5492	54.3931	67.3461	67.3747	68.1546	50.7289	57.3148	66.1148	58.5291	54.9867	56.3759	55.3673	62.5267
			953.16	53.9714	59.7173	52.2737	57.3258	55.0932	67.6223	65.4848	65.2926	53.8223	66.8502	66.9467	67.8314	49.9557	56.9374	65.743	57.9824	54.1751	55.6341	54.5796	61.8894
			953.642	53.7466	59.1967	51.9459	56.7205	54.6958	67.4821	65.2731	65.0741	53.3123	66.4216	66.5768	67.5392	49.2603	56.6072	65.4202	57.5293	53.4476	54.9665	53.866	61.3233
			954.124	53.57	58.7743	51.6918	56.2197	54.38	67.3762	65.1166	64.9045	52.8834	66.0804	66.2877	67.2965	48.6756	56.3458	65.1611	57.1959	52.8354	54.4017	53.2565	60.8589
			954.606	53.4506	58.4754	51.5238	55.8505	54.1646	67.3074	65.0264	64.7928	52.5543	65.8461	66.0997	67.1227	48.2346	56.1718	64.9795	57.0056	52.3697	53.9681	52.7844	60.5264
			955.088	53.3919	58.3216	51.4483	55.6377	54.0634	67.2765	65.0095	64.7451	52.3419	65.737	66.0286	67.0346	47.9668	56.0985	64.8873	56.9777	52.0789	53.6923	52.4835	60.3524
			955.57	53.3941	58.3299	51.4675	55.6029	54.0848	67.2831	65.0689	64.7657	52.2611	65.7691	66.0853	67.0444	47.8967	56.1331	64.8948	57.1273	51.9883	53.5972	52.3849	60.3567
			956.053	53.4561	58.5116	51.5816	55.7633	54.233	67.3271	65.205	64.8578	52.3255	65.9544	66.2756	67.1583	48.042	56.2779	65.0103	57.4635	52.1188	53.7017	52.5141	60.5519
			956.535	53.5772	58.8722	51.7908	56.1298	54.5084	67.4088	65.4165	65.0234	52.5461	66.2996	66.6008	67.3761	48.4128	56.5317	65.2401	57.9878	52.485	54.0185	52.8876	60.9422
			957.017	53.7566	59.4086	52.0946	56.7045	54.9064	67.5276	65.7008	65.2621	52.9292	66.8035	67.0565	67.6917	49.0093	56.8892	65.5856	58.6909	53.0918	54.5527	53.5087	61.5234
			957.499	53.9905	60.1079	52.4894	57.4784	55.4165	67.6807	66.0526	65.5685	53.4725	67.4549	67.6322	68.093	49.82	57.3403	66.0418	59.551	53.9309	55.2982	54.365	62.2818
			957.981	54.2698	60.946	52.9649	58.4285	56.0202	67.8615	66.4624	65.9312	54.1623	68.2321	68.3094	68.5633	50.8196	57.8689	66.5951	60.5342	54.978	56.2362	55.4276	63.1937
			958.463	54.5795	61.8892	53.5035	59.5193	56.6918	68.0597	66.9156	66.3322	54.9731	69.1049	69.0631	69.0826	51.9705	58.4529	67.2238	61.5984	56.1937	57.3353	56.6542	64.2266
			958.945	54.9	62.8978	54.0809	60.7064	57.4009	68.2632	67.3936	66.7501	55.8695	70.038	69.8636	69.6301	53.2265	59.0662	67.9008	62.6987	57.5279	58.554	57.9938	65.3419
			959.427	55.2116	63.9322	54.6705	61.9422	58.117	68.4598	67.8757	67.1632	56.8118	70.9958	70.6804	70.1862	54.5387	59.6818	68.5974	63.7939	58.9262	59.8458	59.3944	66.499
			959.909	55.4988	64.9568	55.2475	63.1817	58.8131	68.6402	68.3424	67.5533	57.7609	71.9458	71.4862	70.7343	55.861	60.2754	69.2871	64.8503	60.3371	61.1642	60.8075	67.659
			960.392	55.753	65.9441	55.7924	64.3872	59.4687	68.7985	68.7777	67.9081	58.6835	72.8613	72.2591	71.2613	57.1536	60.8277	69.9479	65.8441	61.7165	62.4665	62.1919	68.7888
			960.874	55.972	66.8746	56.2921	65.5302	60.0697	68.9319	69.1703	68.2209	59.5542	73.7216	72.9836	71.7568	58.3849	61.3251	70.5635	66.7607	63.0304	63.7163	63.5144	69.8624
			961.356	56.1582	67.7357	56.7388	66.5915	60.6074	69.0397	69.5133	68.489	60.3562	74.5122	73.6504	72.2132	59.5311	61.7593	71.1229	67.5926	64.2547	64.8852	64.749	70.8613
			961.838	56.3144	68.5195	57.1276	67.5593	61.0764	69.1216	69.8031	68.7121	61.0802	75.2241	74.2546	72.6238	60.5758	62.1263	71.6195	68.337	65.3742	65.9531	65.8768	71.7744
			962.32	56.4415	69.2211	57.455	68.4277	61.4737	69.1771	70.0381	68.8903	61.7236	75.8535	74.7943	72.9838	61.5089	62.4254	72.0506	68.9938	66.3811	66.9083	66.8855	72.5962
			962.802	56.5382	69.8373	57.719	69.1944	61.7986	69.2061	70.2182	69.0243	62.288	76.4014	75.2692	73.2895	62.3264	62.6593	72.4173	69.5639	67.2728	67.7469	67.77	73.3251
			963.284	56.6023	70.3665	57.92	69.859	62.0532	69.2092	70.3451	69.1158	62.7777	76.8727	75.6797	73.5396	63.0298	62.8336	72.7237	70.0489	68.0511	68.4713	68.5316	73.9619
			963.767	56.633	70.8093	58.0619	70.4231	62.2433	69.1888	70.4228	69.1689	63.1983	77.2744	76.0269	73.7347	63.6256	62.9572	72.9768	70.4515	68.7207	69.0886	69.1776	74.5085
			964.249	56.6322	71.1692	58.1533	70.8896	62.3779	69.149	70.4581	69.19	63.555	77.6146	76.3126	73.8776	64.124	63.041	73.1845	70.7759	69.2885	69.6082	69.7194	74.9678
			964.731	56.6044	71.4525	58.2057	71.2639	62.4681	69.0943	70.4598	69.1872	63.8523	77.9006	76.5397	73.9727	64.5376	63.0962	73.3547	71.0282	69.763	70.0413	70.1703	75.3437
			965.213	56.5548	71.6681	58.2309	71.5542	62.5246	69.0282	70.4378	69.168	64.0934	78.1381	76.7126	74.0255	64.8793	63.1318	73.4936	71.2162	70.1542	70.3989	70.5437	75.6421
			965.695	56.4866	71.8263	58.2377	71.7722	62.5551	68.9521	70.4006	69.1378	64.2803	78.3312	76.8376	74.0422	65.1607	63.1523	73.6045	71.3491	70.4729	70.6923	70.8518	75.8711
			966.177	56.4001	71.9373	58.2298	71.9313	62.5637	68.8651	70.3538	69.0978	64.415	78.4833	76.9219	74.0293	65.3908	63.1572	73.6886	71.4364	70.73	70.9317	71.1051	76.041
			966.659	56.2936	72.0105	58.2055	72.0458	62.5506	68.7654	70.2991	69.0461	64.5002	78.5971	76.9735	73.9935	65.5756	63.1422	73.7456	71.4873	70.9357	71.1265	71.3116	76.1627
			967.141	56.1659	72.0537	58.1606	72.1286	62.5145	68.6518	70.2354	68.9786	64.5402	78.6763	77.0006	73.9419	65.7184	63.1015	73.7757	71.5105	71.0989	71.284	71.4781	76.2471
			967.624	56.0188	72.0734	58.0911	72.1896	62.4547	68.5251	70.1601	68.8919	64.5413	78.7251	77.0105	73.8811	65.8212	63.0316	73.7811	71.5137	71.2266	71.4093	71.61	76.3034
			968.106	55.8584	72.0753	57.9963	72.2351	62.3735	68.3888	70.071	68.7851	64.5115	78.7484	77.0089	73.8171	65.8861	62.9331	73.7664	71.5036	71.3242	71.5055	71.7118	76.3389
			968.588	55.6936	72.0648	57.8802	72.2678	62.2754	68.2472	69.9676	68.6602	64.4596	78.7515	76.9999	73.7541	65.9158	62.8112	73.7377	71.4858	71.396	71.5745	71.7877	76.3586
			969.07	55.5331	72.0464	57.7495	72.2875	62.1666	68.1046	69.8508	68.5216	64.394	78.7392	76.9853	73.6934	65.9151	62.6743	73.7013	71.4634	71.4459	71.6181	71.8416	76.3662
			969.552	55.3813	72.0238	57.6114	72.2927	62.0526	67.9629	69.7224	68.3748	64.3209	78.7162	76.9649	73.6337	65.8896	62.5311	73.662	71.4377	71.4774	71.6387	71.877	76.3637
			970.034	55.2366	71.9989	57.4707	72.2816	61.936	67.8216	69.5842	68.2244	64.2441	78.6865	76.9369	73.5711	65.8457	62.3883	73.6221	71.4074	71.4945	71.6402	71.897	76.3525
			970.516	55.0926	71.9717	57.3292	72.2533	61.8167	67.6789	69.4373	68.074	64.1648	78.6536	76.8989	73.5014	65.7893	62.249	73.5812	71.3702	71.5005	71.6277	71.9041	76.3329
			970.998	54.9415	71.9406	57.1858	72.2087	61.6928	67.5331	69.2829	67.926	64.0822	78.6209	76.8491	73.4213	65.7256	62.1131	73.5381	71.3238	71.4985	71.6064	71.9009	76.3049
			971.481	54.7784	71.9038	57.0394	72.1507	61.5622	67.3844	69.1229	67.7827	63.9951	78.5914	76.7874	73.3305	65.6588	61.9789	73.4914	71.2678	71.4909	71.581	71.8893	76.2689
			971.963	54.6046	71.8601	56.8906	72.0841	61.4247	67.2352	68.9609	67.6468	63.9025	78.5677	76.716	73.232	65.5922	61.8452	73.4415	71.2044	71.4794	71.5547	71.8718	76.2264
			972.445	54.4269	71.8102	56.7425	72.0145	61.2823	67.0887	68.802	67.5207	63.8047	78.5511	76.6392	73.1306	65.5284	61.7117	73.3902	71.1381	71.4655	71.529	71.8507	76.1807
			972.927	54.2549	71.7562	56.5998	71.9475	61.138	66.9476	68.6513	67.4055	63.7028	78.542	76.5622	73.0319	65.469	61.5793	73.3402	71.0745	71.4502	71.5042	71.8289	76.1369
			973.409	54.0962	71.7015	56.4662	71.8875	60.9947	66.8114	68.5128	67.3003	63.5987	78.539	76.4899	72.9397	65.4145	61.4491	73.2935	71.0187	71.4348	71.4798	71.8095	76.1006
			973.891	53.9538	71.6493	56.3429	71.8365	60.854	66.6774	68.3878	67.2013	63.4941	78.5401	76.4255	72.8549	65.3642	61.321	73.2505	70.9737	71.42	71.4556	71.7951	76.077
			974.373	53.8247	71.6022	56.2275	71.7945	60.7154	66.541	68.2744	67.1032	63.3911	78.5425	76.3702	72.7762	65.3163	61.1934	73.21	70.9398	71.4068	71.4325	71.7882	76.0689
			974.855	53.7028	71.5617	56.1151	71.7596	60.5783	66.3991	68.1687	67.0011	63.2915	78.5445	76.3235	72.701	65.2686	61.0646	73.1695	70.9156	71.396	71.4127	71.7904	76.076
			975.337	53.5823	71.5283	56.0011	71.7299	60.4424	66.2517	68.0667	66.8925	63.1971	78.5453	76.2837	72.6275	65.2193	60.9332	73.1269	70.8988	71.3889	71.3996	71.8025	76.0949
			975.82	53.4606	71.5021	55.8827	71.7044	60.3094	66.1025	67.9656	66.7785	63.1097	78.5456	76.2498	72.5559	65.1676	60.7993	73.0814	70.8881	71.3877	71.3965	71.8243	76.1208
			976.302	53.3391	71.483	55.7601	71.6844	60.182	65.9577	67.8647	66.6634	63.0303	78.5472	76.2216	72.4887	65.1142	60.665	73.0335	70.8834	71.3947	71.4066	71.8548	76.1488
			976.784	53.2214	71.4708	55.6355	71.6725	60.0628	65.823	67.7651	66.5522	62.9587	78.5519	76.2	72.4293	65.0601	60.5329	72.9846	70.8861	71.4125	71.431	71.8923	76.1757
			977.266	53.1099	71.465	55.5114	71.6727	59.9524	65.701	67.6678	66.4485	62.8926	78.5609	76.1863	72.3803	65.007	60.4053	72.9365	70.8974	71.4424	71.4689	71.9344	76.2014
			977.748	53.0038	71.4642	55.3889	71.6878	59.8484	65.59	67.5734	66.353	62.8285	78.5742	76.1812	72.3417	64.9558	60.2828	72.8897	70.9175	71.484	71.5168	71.9788	76.2282
			978.23	52.8992	71.4664	55.2674	71.7187	59.7461	65.4848	67.481	66.263	62.7628	78.5907	76.184	72.3111	64.9077	60.1647	72.8439	70.9448	71.5346	71.5698	72.0237	76.2599
			978.712	52.7909	71.4695	55.1454	71.7635	59.6406	65.3797	67.3887	66.1742	62.6928	78.6092	76.1929	72.2835	64.864	60.0496	72.7988	70.976	71.5901	71.6228	72.0682	76.3
			979.195	52.6759	71.4724	55.0222	71.818	59.5291	65.271	67.2949	66.0831	62.6187	78.6284	76.205	72.2539	64.8268	59.937	72.7545	71.0067	71.6457	71.6716	72.1129	76.3509
			979.677	52.5552	71.4749	54.8995	71.8764	59.4123	65.1588	67.1992	65.9884	62.5434	78.6484	76.2173	72.2186	64.7998	59.8277	72.7123	71.0332	71.6982	71.7146	72.16	76.4131
			980.159	52.4334	71.4783	54.7812	71.9331	59.2944	65.0458	67.1024	65.8915	62.4712	78.6701	76.2278	72.1763	64.7867	59.7234	72.6745	71.0529	71.7466	71.7526	72.2119	76.4848
			980.641	52.3163	71.4846	54.6714	71.9838	59.1805	64.9359	67.006	65.7949	62.4066	78.6951	76.2354	72.1281	64.7904	59.6257	72.643	71.0653	71.7927	71.7891	72.2711	76.5634
			981.123	52.2076	71.4953	54.5728	72.0256	59.0745	64.8307	66.9108	65.7006	62.3516	78.7245	76.2403	72.0766	64.8107	59.534	72.6183	71.0717	71.8399	71.8284	72.3384	76.6452
			981.605	52.1064	71.5103	54.4841	72.0578	58.9769	64.7287	66.8159	65.6082	62.305	78.7583	76.2429	72.0248	64.8438	59.4455	72.5984	71.0735	71.8916	71.8738	72.4129	76.7264
			982.087	52.0076	71.5278	54.4007	72.0805	58.8845	64.6251	66.7187	65.5145	62.2627	78.7943	76.2435	71.975	64.8816	59.3552	72.5796	71.072	71.949	71.926	72.4912	76.8035
			982.569	51.9048	71.5442	54.3158	72.0943	58.792	64.5147	66.6156	65.4149	62.2187	78.8289	76.2418	71.9283	64.9141	59.2578	72.5571	71.0672	72.0104	71.9822	72.5683	76.8727
			983.052	51.7937	71.5556	54.2231	72.0998	58.6947	64.3942	66.5035	65.3051	62.1679	78.8573	76.2363	71.8847	64.9314	59.1495	72.5271	71.0577	72.0707	72.0364	72.6383	76.9304
			983.534	51.6745	71.5588	54.1189	72.097	58.59	64.2637	66.381	65.183	62.1069	78.8754	76.225	71.8431	64.9263	59.0295	72.4883	71.0411	72.123	72.0805	72.6958	76.9733
			984.016	51.5516	71.5519	54.0031	72.0854	58.4781	64.1266	66.2483	65.0494	62.0349	78.8804	76.2053	71.8013	64.8954	58.8993	72.4415	71.0145	72.1609	72.1067	72.7368	76.9991
			984.498	51.431	71.5346	53.8777	72.0646	58.3608	63.9875	66.1069	64.9069	61.953	78.8719	76.1753	71.7565	64.8395	58.7611	72.3891	70.9759	72.18	72.1094	72.7591	77.0068
			984.98	51.3165	71.5076	53.7452	72.0339	58.239	63.8496	65.9587	64.7582	61.8628	78.8515	76.1333	71.7051	64.762	58.6168	72.3333	70.9241	72.1791	72.0867	72.7624	76.9971
			985.462	51.2069	71.4714	53.6069	71.9928	58.1121	63.7129	65.805	64.6053	61.7651	78.8227	76.0789	71.6437	64.6675	58.4665	72.2745	70.8599	72.1599	72.0407	72.7478	76.9726
			985.944	51.0968	71.426	53.4627	71.941	57.9771	63.5744	65.6465	64.4483	61.6598	78.789	76.0132	71.5701	64.5599	58.3091	72.2108	70.7851	72.1262	71.9765	72.7175	76.9368
			986.426	50.9792	71.3705	53.3116	71.8787	57.8305	63.4295	65.484	64.2865	61.5466	78.7528	75.9386	71.4842	64.4417	58.1443	72.1387	70.7029	72.0818	71.9009	72.6737	76.8938
			986.909	50.8495	71.3039	53.1538	71.8067	57.6708	63.2749	65.3191	64.1196	61.4258	78.7152	75.8585	71.3889	64.3149	57.9738	72.0549	70.6172	72.0295	71.82	72.6188	76.8471
			987.391	50.7084	71.2264	52.9917	71.7262	57.4996	63.1101	65.1547	63.9486	61.2989	78.6751	75.7768	71.2889	64.181	57.8027	71.9576	70.5313	71.9712	71.7389	72.555	76.7991
			987.873	50.5619	71.1392	52.8296	71.6393	57.3221	62.9374	64.994	63.7763	61.1692	78.6305	75.6975	71.19	64.0426	57.6376	71.8475	70.4481	71.9076	71.6603	72.4848	76.7515
			988.355	50.4183	71.0457	52.6724	71.5482	57.145	62.761	64.8397	63.6062	61.0401	78.5794	75.6235	71.0965	63.9027	57.4849	71.7278	70.3688	71.8401	71.5853	72.4109	76.7047
			988.837	50.2846	70.9502	52.5236	71.4551	56.9743	62.5844	64.6926	63.4411	60.9146	78.5213	75.5562	71.0101	63.7645	57.3474	71.6028	70.2932	71.7705	71.514	72.3361	76.6583
			989.319	50.1633	70.8575	52.3839	71.3612	56.8129	62.41	64.5508	63.282	60.7933	78.4571	75.4955	70.9292	63.6301	57.223	71.4764	70.22	71.7015	71.4459	72.2629	76.6113
			989.801	50.0521	70.7716	52.2517	71.2671	56.6604	62.2382	64.4112	63.1282	60.6754	78.3902	75.4399	70.85	63.4999	57.1055	71.3514	70.1474	71.6358	71.3812	72.1935	76.5624
			990.283	49.9464	70.6952	52.1247	71.1726	56.5143	62.0695	64.2707	62.9779	60.5589	78.3248	75.3871	70.7687	63.3725	56.9869	71.2291	70.0745	71.5753	71.3204	72.1296	76.5105
			990.765	49.8431	70.6296	52.0021	71.0778	56.3723	61.9052	64.1286	62.8298	60.4425	78.2655	75.3349	70.6835	63.2462	56.8609	71.1101	70.0015	71.5201	71.2645	72.0718	76.4554
			991.248	49.7424	70.5748	51.8851	70.9834	56.2342	61.7486	63.9867	62.6834	60.3263	78.2156	75.2818	70.5955	63.1198	56.7254	70.9951	69.9302	71.4687	71.2146	72.0207	76.3977
			991.73	49.6481	70.5294	51.7769	70.8913	56.1018	61.6041	63.8491	62.5391	60.2122	78.1763	75.227	70.5088	62.9937	56.5828	70.8853	69.8634	71.4186	71.1714	71.9759	76.3399
			992.212	49.5648	70.4911	51.6801	70.8039	55.9783	61.4745	63.7198	62.3972	60.1028	78.1465	75.1705	70.4283	62.8701	56.4384	70.7823	69.8041	71.3672	71.135	71.9369	76.2852
			992.694	49.4939	70.4567	51.5943	70.7238	55.8657	61.3598	63.6008	62.2562	59.9996	78.1231	75.1124	70.3573	62.7525	56.298	70.687	69.7544	71.313	71.104	71.903	76.2373
			993.176	49.4318	70.4224	51.515	70.6523	55.7632	61.2558	63.4905	62.1132	59.9022	78.1022	75.0534	70.2964	62.6438	56.1654	70.5996	69.7149	71.256	71.0764	71.8737	76.1993
			993.658	49.3703	70.3848	51.4349	70.5893	55.6675	61.1555	63.3843	61.9645	59.8081	78.0805	74.9941	70.243	62.5463	56.0414	70.5187	69.6846	71.1976	71.0496	71.8488	76.1725
			994.14	49.2997	70.3416	51.3464	70.5334	55.5737	61.0519	63.277	61.8075	59.714	78.0558	74.9358	70.1926	62.4607	55.9247	70.4423	69.6612	71.1408	71.0215	71.8288	76.1564
			994.623	49.2141	70.2923	51.2454	70.4825	55.478	60.9404	63.1651	61.6424	59.6175	78.028	74.8802	70.1411	62.3866	55.8137	70.3689	69.6419	71.0888	70.9908	71.8153	76.1487
			995.105	49.1136	70.2387	51.1334	70.4351	55.379	60.8202	63.0477	61.4733	59.5182	77.9983	74.8294	70.086	62.323	55.7076	70.298	69.6235	71.0449	70.9582	71.8102	76.1465
			995.587	49.0047	70.1844	51.0168	70.3914	55.2779	60.6941	62.9272	61.3067	59.4186	77.9688	74.785	70.0276	62.2686	55.6067	70.2305	69.6033	71.0122	70.9259	71.8152	76.1474
			996.069	48.897	70.1332	50.9043	70.3529	55.1772	60.5658	62.8068	61.1495	59.3223	77.941	74.7479	69.9674	62.2216	55.511	70.1676	69.5791	70.9925	70.8972	71.8308	76.15
			996.551	48.7984	70.0882	50.8036	70.3223	55.0788	60.438	62.6887	61.0058	59.2331	77.9159	74.7174	69.9076	62.1793	55.4196	70.1099	69.5492	70.9868	70.8753	71.8554	76.154
			997.033	48.7118	70.0506	50.7181	70.3021	54.9828	60.311	62.5725	60.8761	59.1526	77.893	74.6916	69.8492	62.1377	55.3296	70.0561	69.5132	70.9947	70.8626	71.8849	76.1607
			997.515	48.6344	70.0196	50.6463	70.2934	54.8874	60.183	62.4554	60.7568	59.08	77.8713	74.6678	69.7922	62.0922	55.2372	70.0031	69.4725	71.0141	70.8597	71.9141	76.1715
			997.997	48.5606	69.9933	50.5839	70.2957	54.791	60.0528	62.3343	60.6428	59.0128	77.8498	74.644	69.7361	62.0389	55.14	69.9473	69.4299	71.0421	70.8656	71.9383	76.1876
			998.48	48.4858	69.9701	50.5264	70.3069	54.694	59.921	62.208	60.5297	58.9477	77.8283	74.6199	69.6813	61.976	55.0385	69.8858	69.3899	71.0747	70.8781	71.9547	76.21
			998.962	48.4103	69.9495	50.4715	70.3238	54.5994	59.7915	62.0787	60.416	58.8829	77.8079	74.597	69.6295	61.905	54.937	69.8183	69.3578	71.1086	70.895	71.9645	76.239
			999.444	48.339	69.9329	50.4198	70.3435	54.5125	59.6697	61.9515	60.3026	58.818	77.7905	74.5782	69.5836	61.8312	54.8419	69.7473	69.3381	71.1411	70.9148	71.9724	76.2746
			999.926	48.2794	69.9224	50.3732	70.3639	54.4381	59.5598	61.8326	60.192	58.7546	77.779	74.5661	69.5462	61.7621	54.7593	69.6776	69.3333	71.1715	70.9371	71.9855	76.3168
			1000.41	48.2369	69.9204	50.333	70.3838	54.3781	59.4627	61.7263	60.0857	58.6946	77.7759	74.5622	69.5185	61.7051	54.6918	69.6143	69.3434	71.2008	70.9625	72.0109	76.365
			1000.89	48.212	69.9282	50.2977	70.4031	54.3301	59.3748	61.6334	59.9826	58.6399	77.7828	74.5654	69.4989	61.6655	54.6371	69.5612	69.3659	71.2316	70.992	72.0536	76.4186
			1001.37	48.1994	69.9454	50.2634	70.4225	54.2878	59.2896	61.5506	59.8797	58.5915	77.8006	74.5732	69.4839	61.6441	54.5894	69.5202	69.3975	71.2673	71.0262	72.1145	76.4767
			1001.85	48.191	69.9709	50.2259	70.4431	54.2447	59.2012	61.473	59.7731	58.5497	77.8289	74.5814	69.4692	61.6381	54.5426	69.4906	69.4352	71.3112	71.0654	72.1909	76.538
			1002.34	48.1801	70.0032	50.1825	70.4663	54.1969	59.1074	61.3961	59.6605	58.5151	77.8662	74.5871	69.4521	61.6415	54.4932	69.4708	69.4781	71.3662	71.1095	72.2771	76.6013
			1002.82	48.1647	70.0417	50.1346	70.4935	54.1453	59.0111	61.318	59.5423	58.4882	77.9103	74.5885	69.4325	61.6483	54.4426	69.4592	69.5271	71.4341	71.1585	72.3675	76.6658
			1003.3	48.1483	70.0867	50.0867	70.5263	54.0959	58.9193	61.2397	59.4219	58.4703	77.9581	74.5863	69.4129	61.654	54.3965	69.455	69.5845	71.5158	71.213	72.4579	76.7316
			1003.78	48.1373	70.1386	50.0448	70.5656	54.0568	58.8394	61.164	59.3039	58.4621	78.0059	74.5823	69.3968	61.6571	54.3613	69.4582	69.6527	71.611	71.2749	72.5472	76.7994
			1004.26	48.137	70.1974	50.0137	70.6119	54.0345	58.7754	61.093	59.1917	58.4635	78.0499	74.5788	69.3869	61.659	54.3412	69.4687	69.7323	71.7184	71.3461	72.637	76.8704
			1004.75	48.1485	70.2615	49.9949	70.6643	54.0315	58.7262	61.0271	59.0866	58.473	78.0869	74.5774	69.3835	61.6634	54.3352	69.4857	69.8218	71.8361	71.4287	72.7304	76.9455
			1005.23	48.1674	70.328	49.9868	70.7216	54.0449	58.6858	60.9643	58.9875	58.4884	78.1155	74.5787	69.3843	61.6748	54.3373	69.5072	69.9174	71.9611	71.5233	72.8306	77.0248
			1005.71	48.1867	70.3931	49.9864	70.7818	54.0688	58.6466	60.9025	58.8926	58.5081	78.1365	74.5824	69.3858	61.6971	54.3396	69.5305	70.0145	72.0898	71.6288	72.9391	77.1077
			1006.19	48.2003	70.4537	49.9916	70.8436	54.0966	58.6029	60.8409	58.8013	58.5316	78.1533	74.588	69.385	61.7332	54.3356	69.553	70.109	72.2186	71.7422	73.0559	77.1928
			1006.68	48.2062	70.5082	50.0031	70.9064	54.1239	58.5533	60.7816	58.715	58.56	78.171	74.5957	69.3811	61.7842	54.3232	69.5735	70.198	72.3442	71.8593	73.179	77.2786
			1007.16	48.2072	70.5572	50.0234	70.9706	54.1491	58.5005	60.7288	58.6369	58.5951	78.1951	74.6061	69.3755	61.8497	54.3052	69.5924	70.2802	72.4644	71.9757	73.3057	77.3639
			1007.64	48.2086	70.6026	50.0547	71.0369	54.1726	58.4489	60.6868	58.5702	58.638	78.2301	74.6201	69.371	61.9269	54.2873	69.6111	70.3554	72.5782	72.0875	73.4331	77.4483
			1008.12	48.2151	70.6463	50.0969	71.105	54.1945	58.4011	60.6574	58.5159	58.6876	78.2774	74.6377	69.3696	62.0115	54.2747	69.6312	70.4236	72.6864	72.1922	73.5588	77.5315
			1008.6	48.2267	70.6894	50.1458	71.1737	54.213	58.3564	60.6382	58.4719	58.7404	78.3355	74.6576	69.3712	62.0975	54.2693	69.6536	70.4844	72.7904	72.2887	73.6803	77.6133
			1009.09	48.2395	70.7314	50.1938	71.2396	54.2247	58.3109	60.6232	58.4336	58.7912	78.3997	74.6771	69.3734	62.1785	54.2691	69.6775	70.5364	72.8919	72.3765	73.7953	77.6927
			1009.57	48.2469	70.7703	50.2333	71.2985	54.2259	58.2602	60.6044	58.3958	58.8356	78.4637	74.6932	69.3725	62.2484	54.2698	69.7008	70.5778	72.9916	72.4556	73.9012	77.7681
			1010.05	48.2443	70.8039	50.2591	71.3459	54.2152	58.203	60.5759	58.3555	58.8708	78.5213	74.7031	69.3655	62.3032	54.267	69.7209	70.6069	73.0889	72.5257	73.9955	77.8374
			1010.53	48.2318	70.8304	50.2708	71.3786	54.1945	58.1422	60.5348	58.3128	58.8974	78.5675	74.7056	69.3515	62.341	54.2593	69.7353	70.6227	73.1812	72.5862	74.0761	77.8983
			1011.01	48.2143	70.8491	50.2721	71.3957	54.1692	58.0852	60.4828	58.2702	58.9177	78.5993	74.7009	69.3325	62.3619	54.248	69.7421	70.6251	73.2647	72.6362	74.1421	77.9493
			1011.5	48.2	70.8606	50.2682	71.3983	54.1453	58.0399	60.424	58.2306	58.9346	78.6157	74.6902	69.3121	62.367	54.2359	69.74	70.6148	73.3349	72.6754	74.1937	77.9897
			1011.98	48.1957	70.865	50.2632	71.3885	54.1271	58.0113	60.3629	58.1946	58.9488	78.6163	74.6746	69.2938	62.3575	54.2251	69.7279	70.5928	73.3876	72.7034	74.2321	78.0193
			1012.46	48.2038	70.8616	50.2578	71.3685	54.1148	57.9984	60.3018	58.1594	58.958	78.6013	74.6539	69.2789	62.3331	54.2149	69.7042	70.56	73.42	72.7202	74.2583	78.0382
			1012.94	48.221	70.8483	50.2495	71.3386	54.1039	57.9945	60.2409	58.1191	58.9572	78.5704	74.6264	69.2661	62.2923	54.2017	69.6676	70.5165	73.4301	72.7248	74.2723	78.0453
			1013.42	48.2408	70.8217	50.2347	71.297	54.0881	57.9902	60.1789	58.0673	58.9403	78.5226	74.5888	69.2518	62.2326	54.1806	69.617	70.4622	73.4168	72.7154	74.272	78.0386
			1013.91	48.2564	70.7786	50.2118	71.2401	54.0613	57.9764	60.1147	57.9998	58.9027	78.4568	74.5376	69.2318	62.1522	54.148	69.5521	70.3966	73.3794	72.6884	74.2533	78.015
			1014.39	48.2643	70.7166	50.1822	71.1636	54.0201	57.9487	60.0487	57.9163	58.8424	78.3726	74.4705	69.2026	62.0505	54.1033	69.4743	70.3187	73.317	72.6394	74.2113	77.9713
			1014.87	48.2648	70.6354	50.1498	71.0639	53.9646	57.907	59.9826	57.8201	58.7603	78.27	74.3868	69.1629	61.9285	54.0486	69.3858	70.2276	73.2287	72.5636	74.1411	77.9055
			1015.35	48.2605	70.5365	50.1183	70.9391	53.8967	57.8548	59.918	57.7163	58.6589	78.1504	74.2877	69.1125	61.7886	53.9872	69.2888	70.1218	73.1131	72.457	74.0393	77.8171
			1015.84	48.2532	70.4222	50.088	70.7896	53.8181	57.7961	59.8543	57.609	58.5399	78.0155	74.1759	69.052	61.633	53.9209	69.1846	69.9989	72.9695	72.3176	73.9045	77.7074
			1016.32	48.242	70.2948	50.0547	70.6166	53.7285	57.733	59.7883	57.4994	58.4031	77.867	74.0544	68.981	61.4624	53.8484	69.0723	69.856	72.7973	72.145	73.7367	77.5783
			1016.8	48.2229	70.1548	50.01	70.4219	53.6256	57.665	59.7152	57.3863	58.2465	77.7054	73.9252	68.8983	61.2756	53.7659	68.9494	69.6903	72.5967	71.9406	73.5369	77.4315
			1017.28	48.1915	70.0013	49.9455	70.2064	53.5071	57.5905	59.6303	57.2674	58.0671	77.5308	73.789	68.8017	61.0702	53.669	68.8124	69.4994	72.3687	71.707	73.3059	77.2667
			1017.76	48.1458	69.8318	49.8566	69.9703	53.3725	57.5089	59.5322	57.1415	57.8634	77.3418	73.6453	68.6894	60.8433	53.556	68.659	69.2824	72.1145	71.4467	73.0443	77.082
			1018.25	48.0889	69.6437	49.7445	69.7135	53.2253	57.4223	59.4234	57.01	57.6369	77.1367	73.4924	68.5614	60.5937	53.4296	68.4886	69.0406	71.8362	71.1631	72.7529	76.8741
			1018.73	48.0285	69.4352	49.6165	69.4362	53.0719	57.3355	59.3094	56.8767	57.3927	76.9145	73.3284	68.42	60.322	53.2965	68.3033	68.7768	71.536	70.8594	72.4336	76.64
			1019.21	47.9735	69.2057	49.4826	69.1397	52.9195	57.2537	59.196	56.7458	57.1373	76.6745	73.1514	68.2688	60.0311	53.1645	68.1067	68.495	71.2161	70.5399	72.09	76.3782
			1019.69	47.9304	68.9563	49.3513	68.8261	52.7728	57.1805	59.086	56.6199	56.8771	76.4174	72.9602	68.1123	59.7245	53.0393	67.9028	68.1992	70.8783	70.2088	71.7272	76.0893
			1020.17	47.8998	68.6892	49.2263	68.4982	52.6319	57.1162	58.9779	56.4986	56.6162	76.1446	72.7542	67.954	59.4047	52.9218	67.6942	67.8932	70.5235	69.87	71.3505	75.7763
			1020.66	47.8766	68.407	49.1063	68.1583	52.4924	57.0578	58.866	56.3797	56.3555	75.8585	72.5338	67.7961	59.0726	52.8078	67.4816	67.5798	70.1517	69.5258	70.964	75.4433
			1021.14	47.8528	68.1134	48.9866	67.8078	52.3477	57.0018	58.744	56.2606	56.0939	75.562	72.3004	67.6398	58.7279	52.6909	67.2641	67.2619	69.7626	69.1769	70.5698	75.0951
			1021.62	47.8224	67.8119	48.8628	67.4479	52.1922	56.9461	58.6086	56.1406	55.8301	75.2587	72.0571	67.4855	58.3698	52.5655	67.0406	66.9422	69.3566	68.8221	70.1681	74.7363
			1022.1	47.7841	67.5069	48.7341	67.0799	52.0244	56.8917	58.4613	56.0222	55.5641	74.9527	71.8079	67.334	57.9992	52.4298	66.8112	66.6239	68.9358	68.4592	69.758	74.3713
			1022.59	47.7424	67.2024	48.6031	66.7063	51.8471	56.8421	58.3088	55.9096	55.2981	74.648	71.5574	67.186	57.6198	52.2867	66.578	66.3096	68.5043	68.0861	69.3396	74.0045
			1023.07	47.7049	66.9016	48.4746	66.331	51.6659	56.8009	58.1598	55.8063	55.0354	74.3485	71.3101	67.0424	57.2373	52.1414	66.3445	66.0009	68.0685	67.7023	68.9146	73.6403
			1023.55	47.6782	66.6063	48.352	65.9588	51.4861	56.7689	58.0217	55.7126	54.7786	74.0567	71.0693	66.9031	56.8584	51.9989	66.1149	65.6976	67.6351	67.3095	68.4866	73.2827
			1024.03	47.6643	66.3166	48.2359	65.5945	51.3113	56.7433	57.8974	55.6254	54.528	73.7737	70.8367	66.7675	56.4887	51.8615	65.8919	65.3982	67.2097	66.9113	68.0603	72.9347
			1024.51	47.6598	66.0311	48.1238	65.2419	51.1421	56.7186	57.7857	55.5388	54.2817	73.4994	70.6124	66.6345	56.1311	51.7279	65.6767	65.101	66.7956	66.5129	67.6399	72.5978
			1025	47.6582	65.7488	48.0123	64.9032	50.9785	56.6892	57.6828	55.4482	54.0369	73.2328	70.3963	66.5041	55.7856	51.5958	65.4691	64.8053	66.3938	66.1198	67.2284	72.2716
			1025.48	47.654	65.4703	47.9003	64.579	50.822	56.6526	57.5861	55.3526	53.7922	72.9735	70.1885	66.3783	55.4501	51.4639	65.2681	64.5127	66.0037	65.7378	66.8271	71.9551
			1025.96	47.6458	65.1985	47.7907	64.2689	50.6767	56.6112	57.4966	55.2563	53.5486	72.722	69.9897	66.2609	55.1221	51.3345	65.0731	64.2271	65.6245	65.3714	66.4364	71.6474
			1026.44	47.6369	64.9379	47.69	63.9717	50.5487	56.5714	57.4188	55.1673	53.3104	72.4794	69.801	66.1565	54.8004	51.213	64.8845	63.9532	65.2565	65.024	66.0565	71.3485
			1026.92	47.6334	64.6929	47.6052	63.6861	50.4435	56.5408	57.3585	55.0934	53.0834	72.2475	69.6226	66.0684	54.4847	51.1059	64.7031	63.695	64.9013	64.6974	65.6886	71.0595
			1027.41	47.6406	64.4657	47.5402	63.41	50.3625	56.525	57.319	55.0387	52.8725	72.0269	69.4531	65.9961	54.1765	51.0174	64.5298	63.4539	64.5607	64.3909	65.3341	70.7824
			1027.89	47.6596	64.255	47.494	63.141	50.3017	56.5254	57.2988	55.0017	52.6799	71.817	69.2894	65.9356	53.8773	50.9473	64.3641	63.2285	64.2357	64.1022	64.9947	70.5188
			1028.37	47.6869	64.0559	47.4605	62.8766	50.2524	56.5398	57.2912	54.9761	52.505	71.6159	69.1274	65.8796	53.5888	50.8907	64.205	63.0156	63.9251	63.8277	64.671	70.2688
			1028.85	47.7165	63.8624	47.4323	62.6149	50.205	56.5644	57.2872	54.9542	52.3449	71.4213	68.9641	65.8208	53.3127	50.8409	64.0514	62.8119	63.6259	63.5639	64.3628	70.0314
			1029.34	47.7433	63.6694	47.4044	62.3554	50.1526	56.5966	57.279	54.9311	52.1973	71.2313	68.7988	65.7542	53.0507	50.7927	63.903	62.6155	63.3339	63.3086	64.0687	69.8046
			1029.82	47.7661	63.4747	47.3765	62.0999	50.0945	56.6361	57.2636	54.9068	52.0617	71.0457	68.6343	65.6791	52.8047	50.7447	63.7611	62.4267	63.0455	63.0614	63.7877	69.5863
			1030.3	47.7884	63.2797	47.3533	61.8516	50.0354	56.6846	57.2434	54.8862	51.9392	70.865	68.4753	65.5985	52.5762	50.6997	63.6285	62.2469	62.7586	62.8237	63.5186	69.3748
			1030.78	47.8163	63.0877	47.3413	61.6135	49.9831	56.7431	57.2249	54.8757	51.8314	70.6903	68.3268	65.5173	52.365	50.6627	63.5078	62.0771	62.473	62.597	63.2609	69.1691
			1031.26	47.8549	62.9016	47.3445	61.3877	49.9435	56.8098	57.2149	54.8798	51.7384	70.5217	68.1917	65.4394	52.1686	50.6374	63.4006	61.9165	62.19	62.3815	63.0136	68.9686
			1031.75	47.906	62.7221	47.3627	61.1732	49.9185	56.8797	57.2174	54.8983	51.6572	70.3578	68.0695	65.3664	51.9818	50.6242	63.3064	61.7616	61.9114	62.1752	62.7751	68.7721
			1032.23	47.9668	62.5471	47.3904	60.9662	49.9048	56.9462	57.2324	54.9271	51.5823	70.1964	67.9565	65.2971	51.7985	50.6199	63.2225	61.6082	61.6389	61.9735	62.543	68.5776
			1032.71	48.0321	62.373	47.4208	60.7619	49.8967	57.0047	57.2561	54.9603	51.5078	70.0355	67.8475	65.2294	51.6138	50.6204	63.1458	61.4523	61.3737	61.7715	62.3144	68.3828
			1033.19	48.0973	62.1969	47.4483	60.5563	49.8893	57.0557	57.2838	54.9935	51.4294	69.8747	67.7388	65.1622	51.4263	50.6229	63.0739	61.2925	61.1173	61.5652	62.0868	68.1859
			1033.67	48.161	62.0184	47.4724	60.3477	49.8818	57.1051	57.3121	55.0266	51.3465	69.7161	67.6292	65.0976	51.2388	50.6286	63.0062	61.1303	60.8715	61.3538	61.8595	67.9866
			1034.16	48.2252	61.8406	47.4962	60.138	49.8772	57.1621	57.3398	55.0626	51.2616	69.5634	67.5204	65.0398	51.0572	50.6419	62.9432	60.9689	60.6382	61.1397	61.6329	67.7861
			1034.64	48.294	61.6685	47.5247	59.931	49.8803	57.2343	57.3677	55.1057	51.1788	69.4195	67.4153	64.9941	50.8873	50.6675	62.8853	60.8115	60.4184	60.9271	61.4087	67.5867
			1035.12	48.3706	61.5067	47.5606	59.731	49.8937	57.3242	57.397	55.1583	51.1002	69.2853	67.3163	64.9638	50.732	50.7075	62.8313	60.6589	60.211	60.7201	61.1875	67.3911
			1035.6	48.4555	61.3575	47.6016	59.5403	49.916	57.4265	57.4277	55.2183	51.0252	69.1574	67.2233	64.9488	50.5886	50.7584	62.7771	60.5096	60.0116	60.5197	60.9682	67.2008
			1036.09	48.5462	61.2198	47.6412	59.3582	49.9408	57.5308	57.4594	55.2803	50.9498	69.0289	67.1333	64.9452	50.4498	50.812	62.7171	60.3595	59.8129	60.3231	60.7471	67.0155
			1036.57	48.6393	61.0898	47.6714	59.1816	49.9601	57.6254	57.4911	55.3379	50.8687	68.8916	67.0415	64.947	50.3055	50.8584	62.6454	60.2043	59.6061	60.1243	60.5189	66.833
			1037.05	48.7328	60.963	47.6865	59.0058	49.967	57.7032	57.5231	55.3867	50.7781	68.7381	66.9437	64.9484	50.1468	50.8899	62.5583	60.0407	59.3834	59.9153	60.2782	66.6502
			1037.53	48.8275	60.8353	47.6858	58.8259	49.9596	57.7642	57.5573	55.4265	50.6771	68.5648	66.837	64.9457	49.968	50.9036	62.4552	59.8668	59.1397	59.6896	60.0212	66.4635
			1038.01	48.9263	60.7034	47.6739	58.6373	49.9403	57.815	57.5954	55.461	50.5678	68.3716	66.7201	64.9372	49.768	50.9022	62.3386	59.6811	58.8729	59.4425	59.7457	66.2687
			1038.5	49.0319	60.5642	47.657	58.4354	49.914	57.8657	57.6374	55.495	50.4529	68.1612	66.592	64.9224	49.5474	50.8909	62.2121	59.4814	58.5831	59.1718	59.451	66.0605
			1038.98	49.1444	60.4121	47.6401	58.2137	49.8844	57.9241	57.6797	55.5314	50.3334	67.9361	66.4504	64.9	49.3062	50.8745	62.0781	59.2625	58.2698	58.8762	59.1354	65.8317
			1039.46	49.2595	60.2388	47.6229	57.9638	49.851	57.9925	57.7146	55.5695	50.2063	67.6964	66.2905	64.8667	49.041	50.8538	61.9362	59.0166	57.9298	58.5532	58.7947	65.573
			1039.94	49.3702	60.0336	47.6007	57.6749	49.8087	58.0673	57.7328	55.605	50.0646	67.4378	66.1055	64.8171	48.7442	50.8255	61.7834	58.7342	57.5559	58.1978	58.4207	65.2734
			1040.42	49.4698	59.7852	47.5666	57.3362	49.7506	58.1412	57.7269	55.6326	49.8995	67.153	65.8885	64.7455	48.4058	50.784	61.615	58.4069	57.1377	57.8026	58.0026	64.9225
			1040.91	49.5553	59.485	47.5153	56.9386	49.6708	58.2072	57.6948	55.6489	49.7035	66.8334	65.6351	64.6481	48.0168	50.7247	61.427	58.0293	56.6635	57.3594	57.5283	64.5123
			1041.39	49.6291	59.1294	47.4465	56.4776	49.568	58.2624	57.6413	55.6538	49.4724	66.4717	65.3457	64.5241	47.572	50.6468	61.2182	57.6003	56.1235	56.8608	56.9881	64.0394
			1041.87	49.6971	58.7205	47.3651	55.9543	49.4458	58.3082	57.5765	55.6504	49.2065	66.0645	65.025	64.3764	47.0724	50.5539	60.9901	57.1236	55.5121	56.3032	56.3764	63.5054
			1042.35	49.7663	58.2649	47.2793	55.3757	49.3117	58.3494	57.5127	55.6432	48.9093	65.6131	64.6816	64.2098	46.5246	50.4524	60.7469	56.6066	54.8292	55.6869	55.6934	62.9169
			1042.84	49.8405	57.7728	47.1974	54.7532	49.1734	58.3913	57.4595	55.635	48.586	65.124	64.3252	64.0303	45.9398	50.3496	60.4942	56.0606	54.0812	55.0174	54.9453	62.2841
			1043.32	49.9194	57.2562	47.1261	54.1025	49.0379	58.4376	57.4218	55.6272	48.243	64.609	63.965	63.844	45.3322	50.2521	60.2384	55.5021	53.2811	54.3047	54.1456	61.6208
			1043.8	49.9998	56.7306	47.0707	53.4439	48.9114	58.4902	57.4004	55.6203	47.889	64.0853	63.6105	63.6585	44.7201	50.1663	59.9879	54.9551	52.45	53.5651	53.3155	60.9457
			1044.28	50.08	56.2174	47.0383	52.8046	48.8024	58.5511	57.3953	55.6179	47.5378	63.5773	63.2742	63.485	44.1278	50.1014	59.755	54.4542	51.62	52.8233	52.487	60.285
			1044.76	50.1641	55.7477	47.041	52.221	48.725	58.6247	57.4101	55.6294	47.2122	63.1172	62.9745	63.3405	43.5892	50.0721	59.5583	54.0451	50.8364	52.115	51.7055	59.6762
			1045.25	50.2639	55.3638	47.0976	51.7398	48.7014	58.7189	57.4545	55.6708	46.9444	62.7456	62.7387	63.2484	43.1492	50.0998	59.4227	53.7815	50.1585	51.4891	51.0308	59.1687
			1045.73	50.398	55.1162	47.2319	51.4159	48.7599	58.8443	57.5442	55.7626	46.7744	62.5078	62.602	63.2362	42.862	50.2105	59.3774	53.7174	49.6562	51.006	50.5341	58.8218
			1046.21	50.5856	55.0571	47.4672	51.3048	48.9302	59.0104	57.6971	55.924	46.7441	62.4483	62.6029	63.3303	42.7841	50.4285	59.4513	53.8975	49.4018	50.7315	50.2897	58.696
			1046.69	50.8414	55.2298	47.8197	51.454	49.2355	59.2218	57.9274	56.1674	46.8886	62.6024	62.7759	63.5507	42.9647	50.7703	59.666	54.3465	49.458	50.7269	50.3625	58.8428
			1047.17	51.1698	55.6596	48.2932	51.8929	49.6863	59.4758	58.2411	56.4939	47.2301	62.9892	63.1429	63.9054	43.4354	51.2386	60.0317	55.0643	49.8656	51.0375	50.7953	59.2929
			1047.66	51.5645	56.3476	48.878	52.6266	50.2778	59.7625	58.6339	56.8932	47.773	63.6069	63.7082	64.3893	44.2038	51.8212	60.5439	56.025	50.6356	51.6837	51.599	60.0491
			1048.14	52.0113	57.2709	49.5533	53.6343	50.9906	60.0678	59.0922	57.3464	48.5049	64.4334	64.4561	64.9854	45.2514	52.4943	61.1852	57.182	51.7469	52.6562	52.7503	61.0851
			1048.62	52.4925	58.3866	50.2925	54.8725	51.7955	60.3776	59.5968	57.8315	49.3995	65.4297	65.3531	65.6685	46.5372	53.2274	61.9286	58.4752	53.1497	53.9174	54.195	62.3497
			1049.1	52.9908	59.6384	51.0682	56.2803	52.6588	60.6808	60.1266	58.3275	50.4211	66.5455	66.3527	66.4086	48.0027	53.9891	62.7419	59.8388	54.7733	55.4058	55.8563	63.7743
			1049.59	53.4918	60.9639	51.8547	57.7868	53.5461	60.9706	60.6614	58.8174	51.5279	67.7253	67.4016	67.1744	49.5787	54.7515	63.5908	61.2085	56.5344	57.0438	57.6452	65.2826
			1050.07	53.9829	62.3007	52.6294	59.3179	54.4251	61.2434	61.1828	59.2879	52.6748	68.9135	68.4458	67.9347	51.1923	55.491	64.442	62.5281	58.346	58.7467	59.471	66.7996
			1050.55	54.4526	63.5919	53.372	60.8046	55.267	61.4974	61.6748	59.729	53.8162	70.0597	69.4375	68.6605	52.7739	56.1884	65.265	63.7535	60.1265	60.4327	61.2518	68.2593
			1051.03	54.8893	64.7909	54.0646	62.1896	56.0478	61.7311	62.1242	60.1327	54.9093	71.1226	70.3398	69.3271	54.2638	56.829	66.0343	64.8553	61.8073	62.0318	62.9219	69.6108
			1051.51	55.2828	65.8647	54.693	63.4327	56.7497	61.9431	62.5215	60.4934	55.9185	72.0731	71.1308	69.9166	55.6182	57.4024	66.7313	65.8191	63.3381	63.4924	64.4363	70.8214
			1051.99	55.6268	66.7954	55.2483	64.5132	57.363	62.1336	62.8624	60.8087	56.8192	72.8953	71.8035	70.42	56.8117	57.9035	67.3452	66.6427	64.6894	64.784	65.7704	71.8758
			1052.48	55.921	67.5797	55.7282	65.4284	57.8862	62.3053	63.1486	61.0795	57.5991	73.585	72.3633	70.8384	57.8362	58.3326	67.8734	67.3327	65.8509	65.8954	66.9168	72.7734
			1052.96	56.1719	68.226	56.1372	66.1894	58.3256	62.4635	63.3871	61.31	58.2581	74.1481	72.8239	71.181	58.6977	58.6955	68.3192	67.9009	66.8274	66.83	67.88	73.5229
			1053.44	56.3909	68.7505	56.4845	66.8153	58.6926	62.6147	63.5882	61.5062	58.8053	74.5961	73.202	71.4626	59.4105	59.0015	68.6907	68.3611	67.6337	67.6002	68.6717	74.1383
			1053.92	56.5908	69.1727	56.7812	67.328	59.0007	62.7637	63.7626	61.6733	59.2544	74.9444	73.5133	71.699	59.9925	59.2613	68.9974	68.7269	68.2896	68.2232	69.3073	74.635
			1054.41	56.7811	69.5115	57.0371	67.7474	59.262	62.9113	63.9182	61.8142	59.6202	75.2088	73.7696	71.903	60.4617	59.4839	69.2488	69.0111	68.8157	68.7177	69.8047	75.0274
			1054.89	56.9659	69.7824	57.2589	68.0894	59.4852	63.0531	64.0586	61.9294	59.9155	75.404	73.9781	72.0822	60.8341	59.6756	69.4534	69.2246	69.2309	69.1022	70.1833	75.3286
			1055.37	57.1438	69.9962	57.4504	68.365	59.6752	63.1817	64.1832	62.0183	60.1503	75.5424	74.1428	72.2385	61.1239	59.8399	69.6182	69.3773	69.551	69.3939	70.463	75.55
			1055.85	57.3108	70.1598	57.6143	68.581	59.8345	63.2893	64.2893	62.0819	60.3325	75.6338	74.266	72.3702	61.3437	59.979	69.7495	69.4774	69.7882	69.608	70.6631	75.7015
			1056.33	57.4635	70.278	57.7544	68.7419	59.9656	63.3716	64.3749	62.1243	60.4695	75.6855	74.3501	72.4748	61.5057	60.0957	69.8534	69.5329	69.9524	69.7574	70.7997	75.7925
			1056.82	57.6018	70.3549	57.8764	68.8515	60.0722	63.4296	64.4402	62.1536	60.5689	75.7031	74.3989	72.5515	61.621	60.1947	69.9354	69.551	70.0518	69.8525	70.8854	75.8321
			1057.3	57.7292	70.3958	57.9876	68.9141	60.1593	63.4695	64.4879	62.1796	60.6391	75.6911	74.417	72.6024	61.6994	60.2822	70.0006	69.5381	70.0947	69.9013	70.9282	75.8293
			1057.78	57.8501	70.4069	58.0946	68.9346	60.233	63.5003	64.5222	62.211	60.688	75.6536	74.4097	72.6321	61.748	60.3643	70.0526	69.5006	70.0901	69.91	70.9324	75.7929
			1058.26	57.9676	70.3944	58.2007	68.9185	60.298	63.53	64.5468	62.2517	60.7213	75.5947	74.3819	72.646	61.7707	60.4451	70.0931	69.4441	70.0477	69.8845	70.9008	75.7306
			1058.74	58.0813	70.3638	58.3049	68.8712	60.3569	63.564	64.564	62.3003	60.7417	75.5189	74.3374	72.649	61.7679	60.5258	70.1228	69.3741	69.9766	69.8304	70.8359	75.6487
			1059.23	58.1874	70.319	58.4031	68.7977	60.4102	63.6037	64.5745	62.3512	60.749	75.4306	74.2796	72.645	61.7391	60.6047	70.1417	69.2957	69.8848	69.7538	70.7418	75.5517
			1059.71	58.2821	70.2627	58.4909	68.7029	60.4577	63.648	64.5787	62.3976	60.7419	75.3344	74.2119	72.6373	61.6841	60.6796	70.151	69.2147	69.7779	69.661	70.6245	75.4424
			1060.19	58.3638	70.1973	58.5664	68.5923	60.4999	63.6955	64.5783	62.4356	60.7202	75.2344	74.139	72.6294	61.6059	60.7497	70.1534	69.1366	69.6593	69.558	70.4913	75.3234
			1060.67	58.4356	70.1259	58.6323	68.4726	60.5398	63.7463	64.5767	62.466	60.6865	75.1343	74.067	72.6258	61.5117	60.817	70.1533	69.0671	69.5314	69.4498	70.3505	75.198
			1061.16	58.5048	70.0534	58.6952	68.3516	60.5816	63.8013	64.578	62.4939	60.6467	75.0372	74.0026	72.6318	61.4121	60.8856	70.1555	69.0108	69.3967	69.3411	70.2097	75.0713
			1061.64	58.5806	69.9852	58.7629	68.2378	60.6301	63.8621	64.5857	62.5258	60.6088	74.945	73.9518	72.6516	61.319	60.96	70.1638	68.9701	69.2592	69.2351	70.0749	74.9499
			1062.12	58.6702	69.9264	58.841	68.1383	60.688	63.9285	64.6006	62.5671	60.5807	74.8587	73.918	72.6868	61.2431	61.0426	70.1798	68.9453	69.1245	69.1343	69.9501	74.8408
			1062.6	58.7769	69.8802	58.9303	68.0576	60.7548	63.9985	64.6204	62.6188	60.5678	74.7784	73.9014	72.7351	61.1907	61.1325	70.2026	68.9345	68.9989	69.0407	69.837	74.7494
			1063.08	58.8991	69.8468	59.0273	67.9963	60.8271	64.0681	64.641	62.678	60.5718	74.7036	73.8993	72.7913	61.1632	61.226	70.2301	68.9342	68.8879	68.9556	69.7358	74.6784
			1063.57	59.033	69.8247	59.126	67.9514	60.9004	64.1339	64.6588	62.7393	60.5906	74.634	73.9076	72.8493	61.1576	61.3183	70.2607	68.9411	68.7952	68.8798	69.646	74.6267
			1064.05	59.1748	69.8115	59.2208	67.9177	60.9708	64.1939	64.6733	62.7975	60.62	74.5704	73.9223	72.9042	61.1687	61.4067	70.2942	68.9529	68.7219	68.8137	69.5672	74.5907
			1064.53	59.3223	69.8057	59.3098	67.8898	61.037	64.2489	64.6874	62.8497	60.6553	74.5145	73.9416	72.9549	61.1909	61.4923	70.3327	68.9681	68.6671	68.7573	69.5001	74.5656
			1065.01	59.4756	69.8076	59.3949	67.864	61.1006	64.3013	64.7067	62.8957	60.6928	74.4691	73.9654	73.0037	61.2203	61.5794	70.3794	68.9867	68.6288	68.7106	69.4463	74.5472
			1065.49	59.6345	69.8187	59.4802	67.8388	61.1646	64.3535	64.7359	62.9371	60.7302	74.4368	73.9948	73.0548	61.2545	61.674	70.4367	69.0083	68.6052	68.6736	69.4083	74.5328
			1065.98	59.7967	69.8406	59.5701	67.8155	61.2323	64.4063	64.7767	62.9757	60.767	74.4195	74.0308	73.112	61.2926	61.7814	70.505	69.0323	68.5953	68.6466	69.388	74.5219
			1066.46	59.957	69.8731	59.6668	67.7964	61.3056	64.4579	64.8262	63.0128	60.8043	74.4174	74.0724	73.1762	61.3347	61.9034	70.5822	69.0576	68.5991	68.6305	69.3868	74.5148
			1066.94	60.1082	69.914	59.7698	67.7843	61.3854	64.5057	64.8778	63.0487	60.8441	74.4286	74.1173	73.2449	61.3808	62.0388	70.6646	69.0832	68.617	68.6265	69.4042	74.5119
			1067.42	60.2445	69.9593	59.877	67.7815	61.4717	64.548	64.9249	63.0844	60.8898	74.4496	74.162	73.3134	61.4314	62.1833	70.7482	69.1089	68.649	68.6358	69.4383	74.513
			1067.9	60.3637	70.0053	59.9866	67.7892	61.5652	64.5855	64.9634	63.1221	60.9449	74.4759	74.204	73.3772	61.4868	62.3322	70.831	69.1363	68.6941	68.6592	69.4857	74.5175
			1068.39	60.469	70.0497	60.098	67.808	61.6671	64.6221	64.9941	63.1649	61.0127	74.5032	74.2422	73.4347	61.5477	62.4813	70.9128	69.1677	68.7498	68.6964	69.5428	74.525
			1068.87	60.5673	70.0932	60.2121	67.838	61.7789	64.6629	65.022	63.216	61.0945	74.5276	74.2778	73.4874	61.6141	62.627	70.9947	69.2065	68.8126	68.7454	69.6055	74.5366
			1069.35	60.666	70.1383	60.3297	67.8787	61.9003	64.7117	65.0534	63.276	61.1889	74.5465	74.3132	73.5398	61.6854	62.766	71.0774	69.2547	68.8788	68.8026	69.6702	74.5546
			1069.83	60.7692	70.1886	60.4501	67.9291	62.0284	64.7686	65.0925	63.3421	61.2913	74.559	74.3507	73.597	61.7592	62.8941	71.1601	69.3131	68.945	68.8634	69.7339	74.5828
			1070.32	60.8756	70.2463	60.5702	67.9874	62.1577	64.8298	65.1392	63.4079	61.3946	74.5659	74.3913	73.662	61.8328	63.0064	71.2399	69.38	69.0095	68.9231	69.7945	74.6248
			1070.8	60.9796	70.311	60.6854	68.0509	62.2815	64.8892	65.1895	63.4664	61.4916	74.5697	74.4339	73.7347	61.9035	63.0989	71.3132	69.4527	69.0722	68.9783	69.8511	74.6824
			1071.28	61.0746	70.38	60.7915	68.1169	62.3945	64.9415	65.2373	63.5126	61.5776	74.5749	74.4765	73.8118	61.9709	63.1703	71.3773	69.5281	69.1347	69.028	69.9041	74.755
			1071.76	61.1567	70.4495	60.8872	68.1831	62.4948	64.9847	65.2782	63.5463	61.6519	74.5863	74.5171	73.889	62.0376	63.2239	71.4327	69.6039	69.1995	69.0737	69.9552	74.8394
			1072.24	61.2272	70.5166	60.9745	68.2484	62.5848	65.0213	65.3113	63.573	61.7182	74.6085	74.5552	73.9628	62.1088	63.2679	71.4831	69.6791	69.2693	69.1192	70.0076	74.93
			1072.73	61.2925	70.5807	61.058	68.3128	62.6696	65.0567	65.3396	63.6012	61.7822	74.644	74.5921	74.0326	62.1913	63.3132	71.5345	69.7538	69.3462	69.1696	70.0653	75.021
			1073.21	61.3605	70.6435	61.1428	68.3775	62.755	65.0966	65.3685	63.6395	61.8499	74.693	74.6307	74.1003	62.2902	63.3699	71.5924	69.8287	69.4304	69.2294	70.1323	75.1073
			1073.69	61.437	70.7083	61.2314	68.4433	62.8445	65.1439	65.403	63.693	61.9249	74.7521	74.6741	74.1696	62.4072	63.4436	71.6603	69.904	69.5208	69.3015	70.2118	75.1862
			1074.17	61.5228	70.7781	61.3229	68.5108	62.9381	65.198	65.4452	63.7616	62.0072	74.8163	74.725	74.2441	62.5396	63.5337	71.7376	69.9799	69.615	69.3869	70.3056	75.2571
			1074.65	61.6135	70.8542	61.4136	68.5794	63.0331	65.2556	65.4947	63.8414	62.0945	74.8805	74.7842	74.3251	62.6813	63.6337	71.8208	70.0568	69.7105	69.4843	70.414	75.3217
			1075.14	61.7021	70.9359	61.4997	68.648	63.1265	65.314	65.5494	63.9271	62.1842	74.9413	74.8514	74.4115	62.8253	63.7345	71.9055	70.1353	69.8055	69.5915	70.5359	75.3833
			1075.62	61.7827	71.0208	61.5796	68.7158	63.2169	65.3734	65.6081	64.0147	62.2755	74.9984	74.9258	74.5002	62.9663	63.8285	71.9882	70.2175	69.9002	69.7059	70.6696	75.4457
			1076.1	61.8539	71.1072	61.6556	68.7829	63.3062	65.4376	65.6716	64.1035	62.3703	75.0545	75.0068	74.5872	63.1029	63.9121	72.0686	70.3062	69.9966	69.8258	70.8132	75.5126
			1076.58	61.9187	71.1944	61.7332	68.8513	63.3987	65.5127	65.7426	64.1949	62.472	75.1143	75.0942	74.6692	63.2375	63.9872	72.1492	70.4038	70.0985	69.9505	70.9645	75.5869
			1077.07	61.9828	71.2843	61.8182	68.9241	63.4989	65.6041	65.824	64.2906	62.5839	75.182	75.1883	74.7444	63.3747	64.0597	72.2339	70.512	70.21	70.0802	71.1217	75.6709
			1077.55	62.0512	71.3799	61.9139	69.005	63.609	65.7131	65.9167	64.3906	62.7066	75.2599	75.2884	74.8129	63.5189	64.1363	72.326	70.6301	70.3346	70.2157	71.2828	75.7654
			1078.03	62.1255	71.4845	62.0192	69.0973	63.7275	65.8361	66.0186	64.4926	62.8372	75.3481	75.3924	74.876	63.6724	64.2217	72.4267	70.7557	70.4744	70.3577	71.4457	75.8702
			1078.51	62.2032	71.6004	62.129	69.2029	63.8499	65.9656	66.1251	64.593	62.9703	75.4444	75.4968	74.9359	63.8344	64.3176	72.535	70.8853	70.6292	70.5066	71.6089	75.9845
			1078.99	62.28	71.7275	62.2369	69.3225	63.9708	66.0936	66.2321	64.6901	63.1003	75.5467	75.5976	74.9948	64.0019	64.4227	72.6485	71.016	70.7974	70.6622	71.7716	76.1072
			1079.48	62.3528	71.8641	62.3381	69.4557	64.0864	66.2149	66.3376	64.7853	63.224	75.6541	75.6911	75.055	64.1717	64.5342	72.7645	71.1462	70.9768	70.8239	71.9347	76.238
			1079.96	62.4217	72.0075	62.4322	69.6019	64.1969	66.3285	66.4435	64.884	63.3421	75.7675	75.7757	75.1185	64.3414	64.6497	72.8813	71.2767	71.165	70.9911	72.101	76.3777
			1080.44	62.4907	72.1552	62.5228	69.7601	64.3051	66.4369	66.5543	64.9928	63.4588	75.8893	75.8523	75.1872	64.5108	64.7676	72.9983	71.4097	71.3602	71.163	72.2742	76.5281
			1080.92	62.5656	72.3054	62.6155	69.9294	64.4156	66.5435	66.6744	65.1167	63.5797	76.0212	75.9243	75.2621	64.6811	64.887	73.1152	71.548	71.5615	71.3391	72.4588	76.6913
			1081.4	62.6507	72.4571	62.7154	70.1081	64.5314	66.6502	66.805	65.2557	63.7088	76.163	75.9964	75.3435	64.8537	65.0063	73.2312	71.6935	71.7681	71.519	72.6577	76.8686
			1081.89	62.7466	72.6099	62.824	70.2932	64.6526	66.7556	66.9424	65.4042	63.8475	76.3115	76.0734	75.4305	65.0292	65.1231	73.3445	71.8465	71.9788	71.7025	72.8717	77.0592
			1082.37	62.8499	72.7631	62.9387	70.4808	64.7763	66.8564	67.0788	65.5533	63.9937	76.461	76.159	75.5218	65.2062	65.2339	73.4534	72.0055	72.1922	71.8892	73.0984	77.2598
			1082.85	62.9547	72.9155	63.0549	70.6661	64.8978	66.9495	67.2053	65.6943	64.1432	76.6049	76.2547	75.6158	65.3825	65.3358	73.5572	72.1682	72.406	72.0782	73.3326	77.4649
			1083.33	63.0556	73.0654	63.1677	70.8447	65.0131	67.0348	67.3154	65.8227	64.2923	76.7383	76.36	75.7115	65.555	65.4279	73.6574	72.332	72.618	72.2685	73.5677	77.6678
			1083.82	63.1503	73.2111	63.275	71.0137	65.1203	67.116	67.4084	65.9392	64.4387	76.8591	76.4728	75.8081	65.7214	65.5117	73.7577	72.4947	72.826	72.4578	73.7968	77.8621
			1084.3	63.2399	73.3513	63.3777	71.1721	65.22	67.1991	67.4888	66.0491	64.5819	76.9687	76.5903	75.9053	65.8805	65.591	73.8627	72.6552	73.0289	72.6438	74.0146	78.0437
			1084.78	63.3273	73.4856	63.4789	71.3214	65.3145	67.2896	67.5652	66.1588	64.7228	77.0712	76.7091	76.0019	66.0319	65.6702	73.9758	72.8127	73.2262	72.824	74.2184	78.211
			1085.26	63.4147	73.6143	63.5821	71.4644	65.406	67.3898	67.6464	66.2722	64.8616	77.1712	76.8262	76.0958	66.1761	65.7527	74.0977	72.9661	73.4183	72.9968	74.408	78.3651
			1085.74	63.5017	73.738	63.689	71.6047	65.496	67.4972	67.7385	66.3889	64.9974	77.2724	76.9393	76.1834	66.3134	65.8392	74.2248	73.1141	73.606	73.1615	74.5857	78.5088
			1086.23	63.5851	73.8573	63.7993	71.7448	65.5847	67.6061	67.8432	66.5052	65.1281	77.3762	77.0471	76.2609	66.4444	65.9283	74.3508	73.2551	73.7899	73.319	74.7549	78.6451
			1086.71	63.6606	73.9721	63.9107	71.8858	65.6728	67.7107	67.9586	66.616	65.2513	77.4819	77.1492	76.325	66.5702	66.0177	74.4683	73.387	73.9698	73.4711	74.9187	78.776
			1087.19	63.7254	74.0821	64.0208	72.027	65.7613	67.808	68.0811	66.7185	65.3663	77.5874	77.2462	76.3745	66.6923	66.1057	74.5719	73.5086	74.145	73.6192	75.0795	78.902
			1087.67	63.7799	74.1865	64.1277	72.1669	65.8524	67.8995	68.2066	66.8133	65.474	77.6906	77.3389	76.4108	66.8134	66.1919	74.6594	73.6193	74.3141	73.764	75.2386	79.0223
			1088.15	63.828	74.2849	64.2304	72.3036	65.9482	67.9899	68.3318	66.9039	65.577	77.7901	77.4277	76.4377	66.936	66.2774	74.7328	73.7202	74.4753	73.9045	75.3959	79.1359
			1088.64	63.8754	74.3767	64.3281	72.4357	66.049	68.0845	68.454	66.9943	65.6777	77.8851	77.5121	76.4603	67.0618	66.3632	74.7961	73.8129	74.6271	74.038	75.551	79.2425
			1089.12	63.9267	74.4621	64.4196	72.563	66.1518	68.1859	68.5699	67.0861	65.7772	77.9752	77.5904	76.4834	67.1903	66.449	74.8544	73.8998	74.7685	74.1613	75.7028	79.3425
			1089.6	63.9833	74.5409	64.5025	72.686	66.2506	68.2918	68.6756	67.1773	65.8739	78.0594	77.66	76.5105	67.3184	66.5325	74.9111	73.9833	74.8992	74.2717	75.8497	79.4376
			1090.08	64.0438	74.6133	64.5747	72.8049	66.3376	68.3963	68.7673	67.2628	65.9641	78.1359	77.7183	76.5429	67.441	66.6101	74.9675	74.0651	75.0194	74.3683	75.9894	79.5292
			1090.57	64.1048	74.6797	64.6357	72.9198	66.4068	68.4922	68.8429	67.3375	66.0437	78.2022	77.7638	76.5801	67.5522	66.6787	75.0233	74.1463	75.13	74.4525	76.1187	79.6184
			1091.05	64.1642	74.7408	64.6876	73.0293	66.4561	68.5751	68.9039	67.3987	66.1103	78.2558	77.7972	76.6205	67.6475	66.7375	75.0773	74.2272	75.2323	74.5279	76.234	79.7049
			1091.53	64.2222	74.7979	64.7361	73.131	66.4887	68.6449	68.9547	67.4481	66.1644	78.2957	77.8211	76.6629	67.7248	66.7888	75.1286	74.3071	75.3276	74.5993	76.3319	79.7875
			1092.01	64.2817	74.8529	64.788	73.2217	66.5116	68.7061	69.0024	67.4911	66.2093	78.3227	77.8399	76.7063	67.7854	66.8371	75.1769	74.3845	75.4177	74.6711	76.4104	79.8644
			1092.49	64.3462	74.9075	64.8493	73.2982	66.5332	68.7655	69.053	67.5341	66.2501	78.3398	77.8583	76.7499	67.8325	66.8867	75.2225	74.457	75.5038	74.746	76.4694	79.9338
			1092.98	64.4177	74.9624	64.9224	73.3582	66.5597	68.8291	69.1096	67.5821	66.291	78.3511	77.8792	76.793	67.8707	66.9404	75.2651	74.5214	75.5864	74.8242	76.5113	79.9941
			1093.46	64.4945	75.0165	65.0044	73.4006	66.5931	68.8994	69.1704	67.6366	66.3338	78.3606	77.9034	76.8341	67.9032	66.9971	75.3033	74.5742	75.664	74.9026	76.5398	80.044
			1093.94	64.5717	75.0664	65.0883	73.4257	66.6314	68.9752	69.2298	67.6955	66.3773	78.3706	77.9285	76.8712	67.9319	67.0533	75.335	74.6115	75.7335	74.9756	76.5588	80.0819
			1094.42	64.6436	75.1073	65.1656	73.435	66.6702	69.0529	69.2811	67.7557	66.4176	78.3807	77.9499	76.9019	67.9562	67.1042	75.3584	74.6304	75.7897	75.0359	76.5707	80.1057
			1094.9	64.706	75.1337	65.2293	73.4308	66.7056	69.1289	69.3195	67.8148	66.4502	78.388	77.9622	76.9243	67.9745	67.1467	75.3724	74.6289	75.8267	75.0762	76.5757	80.1128
			1095.39	64.7584	75.1414	65.2763	73.416	66.7361	69.2013	69.3445	67.8725	66.471	78.3876	77.9604	76.9372	67.985	67.1807	75.3781	74.6066	75.8393	75.0905	76.5722	80.1011
			1095.87	64.8039	75.1287	65.3082	73.3932	66.763	69.2707	69.3596	67.93	66.4778	78.3748	77.9416	76.9404	67.9867	67.2088	75.3777	74.5643	75.8251	75.0752	76.5575	80.0693
			1096.35	64.8471	75.0965	65.3301	73.3645	66.7888	69.339	69.3702	67.9884	66.4702	78.3458	77.9047	76.9339	67.9795	67.2349	75.3738	74.5037	75.7847	75.0297	76.5294	80.018
			1096.83	64.8914	75.0478	65.3478	73.3306	66.8151	69.4074	69.3808	68.0465	66.4489	78.2992	77.8509	76.9177	67.9636	67.2618	75.3676	74.427	75.7227	74.9567	76.487	79.9493
			1097.32	64.9369	74.9868	65.366	73.2908	66.8408	69.476	69.3922	68.1002	66.4157	78.2361	77.7824	76.8912	67.9388	67.2893	75.3587	74.336	75.6455	74.8613	76.4311	79.8665
			1097.8	64.9799	74.9169	65.3867	73.243	66.8619	69.5431	69.4019	68.1439	66.3722	78.1596	77.7019	76.8536	67.9043	67.3142	75.3443	74.2327	75.5596	74.7494	76.3631	79.7723
			1098.28	65.0155	74.8403	65.4096	73.1839	66.8737	69.6065	69.4055	68.1732	66.3208	78.0738	77.6118	76.8045	67.8583	67.3314	75.3213	74.1192	75.4694	74.6266	76.2841	79.6684
			1098.76	65.04	74.7578	65.4333	73.1107	66.8726	69.6647	69.3997	68.1875	66.2642	77.9821	77.5146	76.745	67.7986	67.3364	75.2872	73.9978	75.3761	74.4972	76.1937	79.555
			1099.24	65.0537	74.6696	65.4559	73.0218	66.858	69.7174	69.3845	68.1909	66.205	77.8868	77.4126	76.6781	67.7242	67.3272	75.2417	73.8717	75.2778	74.3635	76.0905	79.4312
			1099.73	65.0606	74.5764	65.4754	72.9181	66.8332	69.7657	69.3636	68.1907	66.1455	77.7887	77.308	76.6086	67.6349	67.3049	75.1866	73.7443	75.1705	74.2264	75.9723	79.2963
			1100.21	65.0678	74.4795	65.4896	72.8026	66.8033	69.81	69.343	68.1946	66.0859	77.6868	77.2034	76.5423	67.5322	67.273	75.1251	73.6185	75.0498	74.0858	75.8375	79.1511
			1100.69	65.0817	74.3813	65.496	72.68	66.7735	69.8501	69.3283	68.2071	66.0239	77.5794	77.1006	76.4842	67.4184	67.2357	75.0603	73.496	74.9127	73.9408	75.6863	78.9973
			1101.17	65.1058	74.2837	65.4915	72.5555	66.7472	69.8847	69.3218	68.2275	65.9552	77.4647	77.0011	76.4376	67.2959	67.1968	74.9937	73.3768	74.7578	73.791	75.5207	78.8378
			1101.65	65.1401	74.1877	65.4743	72.4327	66.725	69.9124	69.3224	68.2513	65.8744	77.3422	76.905	76.4028	67.1664	67.1584	74.9254	73.2595	74.5856	73.6361	75.3438	78.6753
			1102.14	65.1812	74.0924	65.4447	72.313	66.7057	69.9341	69.3259	68.2723	65.7783	77.2124	76.8116	76.378	67.0309	67.122	74.8542	73.1417	74.398	73.4759	75.1591	78.5113
			1102.62	65.2252	73.9956	65.4069	72.1953	66.6873	69.9534	69.3283	68.2865	65.6668	77.0774	76.7197	76.3594	66.8897	67.0888	74.7791	73.0214	74.1977	73.3104	74.9694	78.3462
			1103.1	65.2691	73.8941	65.3677	72.0768	66.6692	69.9768	69.3276	68.294	65.5439	76.9405	76.6274	76.3429	66.7438	67.0608	74.7004	72.8972	73.9881	73.1401	74.7765	78.1794
			1103.58	65.3117	73.785	65.3355	71.9541	66.6515	70.0106	69.3244	68.2993	65.4169	76.8046	76.5332	76.3245	66.5947	67.0405	74.6199	72.7686	73.7732	72.9653	74.5811	78.0102
			1104.07	65.3527	73.6667	65.3166	71.8241	66.6347	70.0589	69.3213	68.3083	65.293	76.6719	76.4357	76.3009	66.4446	67.0295	74.5401	72.6355	73.5573	72.7866	74.3836	77.8387
			1104.55	65.3917	73.5386	65.313	71.6846	66.6184	70.1208	69.3206	68.3257	65.1771	76.5426	76.3341	76.2699	66.2955	67.0276	74.4632	72.4977	73.3443	72.6045	74.1841	77.6659
			1105.03	65.4272	73.4016	65.3218	71.5342	66.6005	70.1903	69.3229	68.3525	65.0697	76.4153	76.2282	76.2304	66.1488	67.0319	74.3893	72.3547	73.1367	72.4193	73.9828	77.493
			1105.51	65.4571	73.2569	65.3359	71.3723	66.5776	70.2584	69.3258	68.3852	64.9672	76.2868	76.1186	76.1822	66.0042	67.0379	74.317	72.2053	72.9347	72.2304	73.7792	77.3205
			1105.99	65.4802	73.106	65.3478	71.1989	66.5467	70.317	69.3256	68.418	64.8641	76.1542	76.007	76.1265	65.8599	67.0409	74.2439	72.0486	72.736	72.0368	73.5721	77.1479
			1106.47	65.4975	72.9507	65.352	71.0142	66.507	70.3619	69.3195	68.4453	64.7559	76.0154	75.8958	76.0653	65.7131	67.0379	74.1679	71.8841	72.5365	71.8368	73.3597	76.9737
			1106.96	65.5131	72.7929	65.3476	70.8195	66.4602	70.3946	69.3066	68.4644	64.6415	75.8702	75.7876	76.0012	65.5612	67.0289	74.0885	71.712	72.3312	71.6286	73.1396	76.7954
			1107.44	65.533	72.6348	65.3375	70.617	66.4104	70.4209	69.2892	68.4756	64.523	75.7201	75.6841	75.936	65.4018	67.016	74.0067	71.5326	72.1168	71.4107	72.9098	76.611
			1107.92	65.5622	72.4782	65.3261	70.4094	66.3622	70.4485	69.2712	68.4818	64.405	75.5672	75.585	75.8701	65.2333	67.0021	73.9245	71.3456	71.8916	71.1819	72.6693	76.4185
			1108.4	65.602	72.3236	65.3163	70.1991	66.3179	70.4829	69.2559	68.4861	64.2908	75.4135	75.4873	75.8016	65.0545	66.9883	73.8431	71.1498	71.6563	70.9417	72.4176	76.2166
			1108.89	65.6488	72.1699	65.3075	69.9877	66.2769	70.5259	69.2448	68.4905	64.1804	75.2592	75.386	75.7273	64.8643	66.9732	73.7618	70.9427	71.4124	70.6896	72.1549	76.0037
			1109.37	65.6946	72.0136	65.2955	69.7747	66.235	70.5751	69.2363	68.4955	64.0699	75.1025	75.2749	75.6435	64.6617	66.9524	73.6779	70.7217	71.1604	70.4249	71.8808	75.7776
			1109.85	65.7304	71.8498	65.2744	69.5579	66.1872	70.6264	69.2273	68.5006	63.9526	74.94	75.1487	75.5481	64.4459	66.9208	73.5872	70.4855	70.8993	70.1467	71.5941	75.5359
			1110.33	65.7494	71.6732	65.24	69.3341	66.1293	70.6761	69.2153	68.5055	63.8218	74.7673	75.0051	75.4419	64.2167	66.8748	73.4857	70.2345	70.6251	69.854	71.2926	75.276
			1110.81	65.7495	71.4802	65.1915	69.1002	66.0599	70.7226	69.1996	68.5111	63.6734	74.5805	74.8445	75.3287	63.9751	66.8138	73.3707	69.9713	70.3324	69.5456	70.9737	74.9968
			1111.3	65.7342	71.2693	65.1317	68.8542	65.9807	70.7671	69.1821	68.5187	63.5076	74.3763	74.6704	75.214	63.7226	66.7405	73.2414	69.6996	70.0156	69.2204	70.6351	74.6991
			1111.78	65.71	71.0415	65.066	68.5954	65.8946	70.8114	69.1663	68.5291	63.3282	74.1528	74.4865	75.1026	63.461	66.6597	73.0986	69.4225	69.6706	68.8781	70.2756	74.3856
			1112.26	65.684	70.7994	64.9993	68.3242	65.8039	70.8567	69.1548	68.5408	63.1401	73.9091	74.2956	74.9963	63.1911	66.5757	72.943	69.1407	69.2957	68.5184	69.8949	74.06
			1112.74	65.6607	70.5456	64.9334	68.0407	65.7086	70.9023	69.1478	68.5501	62.9472	73.6451	74.0975	74.8927	62.9123	66.491	72.7751	68.8521	68.8914	68.1412	69.4938	73.7251
			1113.22	65.6415	70.2817	64.8667	67.7442	65.6065	70.946	69.1428	68.5522	62.7499	73.362	73.8896	74.7857	62.6225	66.4052	72.5944	68.5522	68.4599	67.7466	69.073	73.3816
			1113.71	65.6252	70.0079	64.795	67.4328	65.4942	70.9863	69.1355	68.5436	62.546	73.0619	73.6681	74.6679	62.3193	66.316	72.4007	68.2361	68.0042	67.3354	68.6329	73.0279
			1114.19	65.6107	69.7231	64.7141	67.1038	65.3699	71.0233	69.1223	68.5234	62.3315	72.7491	73.4301	74.5332	62.001	66.221	72.1948	67.9005	67.5272	66.9087	68.174	72.6607
			1114.67	65.5978	69.4262	64.6215	66.7549	65.2342	71.06	69.1014	68.4948	62.1029	72.429	73.1754	74.3796	61.6672	66.1191	71.9794	67.5445	67.0319	66.469	67.697	72.2769
			1115.15	65.5883	69.117	64.518	66.3851	65.0903	71.1012	69.0741	68.4635	61.8591	72.1078	72.9069	74.2099	61.3193	66.0109	71.7589	67.1701	66.5212	66.0186	67.2031	71.8748
			1115.64	65.5841	68.7955	64.4067	65.9947	64.943	71.1512	69.0431	68.4353	61.6011	71.791	72.6297	74.0298	60.9592	65.8984	71.5375	66.7806	65.9979	65.5597	66.6941	71.4545
			1116.12	65.5854	68.4622	64.2913	65.5848	64.7961	71.2119	69.0111	68.4137	61.3314	71.4813	72.3486	73.8467	60.5874	65.7832	71.318	66.3785	65.4644	65.0927	66.1718	71.0174
			1116.6	65.5892	68.1164	64.1744	65.1565	64.651	71.2819	68.9782	68.3984	61.0525	71.1778	72.0665	73.6657	60.2027	65.6656	71.1	65.9652	64.922	64.6157	65.6364	70.5642
			1117.08	65.5898	67.7559	64.0566	64.7101	64.5064	71.357	68.9421	68.3859	60.7655	70.876	71.783	73.4889	59.8018	65.5447	70.8802	65.5405	64.3705	64.1244	65.0868	70.0943
			1117.56	65.5813	67.3778	63.9365	64.2452	64.3596	71.4326	68.8988	68.3714	60.47	70.569	71.4952	73.3152	59.3809	65.4183	70.6541	65.1035	63.808	63.6138	64.5198	69.6053
			1118.05	65.5593	66.9796	63.8125	63.7613	64.2088	71.5053	68.8447	68.3516	60.1651	70.2504	71.1994	73.1415	58.9373	65.2853	70.4178	64.6542	63.2325	63.0799	63.9318	69.0945
			1118.53	65.5241	66.561	63.6829	63.2593	64.0534	71.5744	68.7785	68.3255	59.8501	69.9153	70.8929	72.9652	58.4712	65.1454	70.1698	64.1936	62.6419	62.521	63.32	68.5609
			1119.01	65.4793	66.1242	63.5471	62.7415	63.8947	71.6408	68.7022	68.2946	59.5247	69.5618	70.575	72.7845	57.9859	64.9997	69.9112	63.7231	62.0354	61.9389	62.6832	68.0061
			1119.49	65.4309	65.6738	63.4043	62.2114	63.7336	71.7049	68.62	68.2606	59.1892	69.1903	70.2466	72.5995	57.4861	64.8492	69.6445	63.243	61.4129	61.3376	62.0223	67.4348
			1119.97	65.3834	65.215	63.2533	61.6718	63.5689	71.7656	68.5364	68.224	58.8429	68.8025	69.909	72.4108	56.9761	64.6934	69.3712	62.7516	60.7741	60.7218	61.3393	66.8525
			1120.46	65.3386	64.7513	63.0919	61.1242	63.3964	71.8189	68.4543	68.1827	58.484	68.3999	69.5625	72.2191	56.4574	64.5301	69.0904	62.245	60.1177	60.0945	60.6362	66.2638
			1120.94	65.294	64.2835	62.9179	60.567	63.2097	71.8603	68.3737	68.1334	58.1099	67.9828	69.2057	72.0235	55.928	64.3555	68.7986	61.7185	59.4406	59.4565	59.914	65.6691
			1121.42	65.2455	63.8091	62.7302	59.9972	63.0025	71.8867	68.2927	68.0736	57.7182	67.5512	68.8365	71.8228	55.384	64.1662	68.4912	61.1694	58.7396	58.806	59.1731	65.0657
			1121.9	65.1892	63.3246	62.5309	59.4116	62.7719	71.8992	68.2085	68.003	57.3084	67.1055	68.4538	71.6153	54.8211	63.961	68.1653	60.5988	58.0121	58.1406	58.4139	64.4485
			1122.38	65.1244	62.8271	62.3248	58.8088	62.5198	71.9035	68.1197	67.9254	56.883	66.647	68.0584	71.4003	54.2377	63.7421	67.8211	60.0123	57.2583	57.4586	57.6379	63.813
			1122.87	65.0532	62.3155	62.1185	58.1905	62.2523	71.9088	68.0266	67.8468	56.4466	66.1785	67.654	71.1781	53.635	63.5138	67.4627	59.4176	56.4819	56.7606	56.8481	63.158
			1123.35	64.9793	61.7913	61.9176	57.5607	61.9776	71.9239	67.9312	67.7732	56.0046	65.7031	67.2455	70.9492	53.0166	63.2813	67.0963	58.8215	55.6889	56.0485	56.0479	62.4858
			1123.83	64.9057	61.2565	61.7242	56.9237	61.7017	71.9544	67.8355	67.7074	55.5602	65.2224	66.8371	70.7139	52.3861	63.0479	66.7269	58.2268	54.8856	55.3243	55.2393	61.8012
			1124.31	64.8321	60.7123	61.5356	56.2815	61.426	72	67.7399	67.6483	55.1132	64.7361	66.4301	70.4711	51.745	62.814	66.3558	57.6306	54.0757	54.5891	54.4214	61.109
			1124.8	64.7549	60.158	61.3448	55.6331	61.147	72.0551	67.6432	67.5911	54.66	64.2415	66.0223	70.2188	51.0922	62.5768	65.9798	57.0264	53.2594	53.8417	53.5904	60.4117
			1125.28	64.6688	59.5908	61.1437	54.9744	60.858	72.1112	67.5428	67.5296	54.1953	63.7353	65.609	69.9552	50.4248	62.3322	65.5924	56.4069	52.4334	53.0802	52.7405	59.709
			1125.76	64.5696	59.0079	60.9258	54.3009	60.5526	72.1597	67.4362	67.4595	53.715	63.2154	65.1854	69.6796	49.7403	62.0772	65.1873	55.768	51.5935	52.3029	51.8678	58.9982
			1126.24	64.4562	58.4077	60.6889	53.6101	60.2276	72.1957	67.3223	67.3796	53.2186	62.6828	64.7492	69.394	49.039	61.8111	64.7609	55.1107	50.7368	51.5109	50.9719	58.2766
			1126.72	64.3318	57.7914	60.4351	52.903	59.8842	72.2178	67.2017	67.2918	52.7093	62.1412	64.3015	69.1023	48.3245	61.5355	64.3145	54.4406	49.8634	50.7077	50.0576	57.5434
			1127.21	64.2019	57.1622	60.1689	52.1846	59.5269	72.2284	67.0764	67.1991	52.192	61.5958	63.8462	68.8094	47.6023	61.2527	63.8536	53.7648	48.9766	49.8979	49.133	56.7999
			1127.69	64.0719	56.5242	59.8946	51.4608	59.1608	72.2308	66.9479	67.1033	51.6712	61.051	63.3875	68.5186	46.8772	60.9636	63.3849	53.0887	48.0805	49.0858	48.2066	56.0487
			1128.17	63.945	55.8801	59.6144	50.737	58.7893	72.2281	66.8167	67.0041	51.1482	60.5086	62.9281	68.231	46.1514	60.6666	62.914	52.4136	47.1783	48.2724	47.2839	55.292
			1128.65	63.8211	55.2307	59.3276	50.0153	58.4138	72.2222	66.682	66.8991	50.621	59.9674	62.468	67.9449	45.424	60.3589	62.4437	51.7375	46.2712	47.4558	46.3657	54.5303
			1129.13	63.6983	54.5755	59.0327	49.2958	58.0343	72.2142	66.5422	66.7864	50.0857	59.4248	62.005	67.6575	44.6922	60.0381	61.9736	51.0573	45.3586	46.6329	45.4489	53.7626
			1129.62	63.5752	53.9142	58.7292	48.5772	57.6521	72.205	66.3974	66.6666	49.5398	58.8793	61.5373	67.367	43.9548	59.7055	61.5031	50.3724	44.4408	45.8017	44.53	52.9886
			1130.1	63.4532	53.2492	58.4198	47.8595	57.2712	72.1961	66.2494	66.5437	48.9844	58.3321	61.0655	67.074	43.2142	59.3667	61.0325	49.6861	43.5203	44.9642	43.6078	52.2096
			1130.58	63.3365	52.5854	58.1099	47.1454	56.8977	72.1891	66.1021	66.4244	48.4244	57.7875	60.5936	66.7816	42.4764	59.0311	60.5649	49.0046	42.6025	44.1264	42.6852	51.4303
			1131.06	63.2303	51.9291	57.8058	46.4391	56.5382	72.1846	65.96	66.3146	47.8668	57.251	60.1282	66.4944	41.7492	58.7083	60.1045	48.3349	41.694	43.2968	41.7682	50.6571
			1131.55	63.1387	51.2855	57.5122	45.7444	56.1958	72.1811	65.8257	66.2171	47.3178	56.7266	59.6762	66.2156	41.0383	58.4042	59.655	47.6808	40.8001	42.4826	40.8627	49.8963
			1132.03	63.0615	50.6562	57.2301	45.0631	55.8685	72.175	65.6991	66.1295	46.78	56.2148	59.2423	65.9458	40.3448	58.119	59.2166	47.042	39.9219	41.6875	39.9713	49.1513
			1132.51	62.994	50.039	56.9571	44.3933	55.5495	72.1617	65.5772	66.0454	46.2519	55.7124	58.8275	65.6824	39.665	57.847	58.7861	46.4151	39.0568	40.9106	39.0923	48.4219
			1132.99	62.9286	49.429	56.6898	43.7314	55.2305	72.1379	65.4554	65.9568	45.7302	55.2146	58.4297	65.4213	38.9926	57.5799	58.3579	45.7963	38.2002	40.1486	38.2212	47.7053
			1133.47	62.8578	48.8224	56.4259	43.0737	54.9056	72.1031	65.3304	65.8584	45.2127	54.718	58.0453	65.1591	38.3228	57.3108	57.9272	45.1849	37.3497	39.3986	37.3546	46.9993
			1133.96	62.777	48.2185	56.1666	42.4194	54.5748	72.0607	65.2017	65.749	44.7001	54.2232	57.6718	64.8955	37.6557	57.037	57.4925	44.5849	36.5077	38.6608	36.4935	46.3044
			1134.44	62.6862	47.6217	55.9156	41.7714	54.2441	72.0167	65.0721	65.6325	44.1969	53.7349	57.3081	64.6334	36.9967	56.7613	57.0568	44.0031	35.6818	37.9393	35.6446	45.6252
			1134.92	62.5891	47.0393	55.6773	41.1348	53.9222	71.9774	64.9461	65.5149	43.7083	53.26	56.9544	64.3779	36.3538	56.4894	56.6265	43.446	34.8825	37.2393	34.8188	44.9687
			1135.4	62.4909	46.4784	55.4531	40.5152	53.6168	71.9465	64.828	65.4014	43.2375	52.8045	56.611	64.134	35.7337	56.2262	56.2078	42.9166	34.1179	36.5637	34.0263	44.3411
			1135.88	62.3961	45.9434	55.2396	39.9156	53.3297	71.9241	64.7197	65.2942	42.7832	52.3705	56.2769	63.9042	35.1382	55.9734	55.8042	42.4124	33.3905	35.911	33.2729	43.7452
			1136.37	62.3067	45.4339	55.0293	39.3362	53.0564	71.9071	64.6194	65.192	42.3404	51.9561	55.9495	63.688	34.5633	55.7282	55.4155	41.9273	32.6962	35.2754	32.5579	43.1785
			1136.85	62.2223	44.9462	54.8136	38.7759	52.7883	71.891	64.5235	65.0915	41.9036	51.5567	55.6266	63.4834	34.0022	55.486	55.0385	41.4545	32.0266	34.6497	31.8751	42.6357
			1137.33	62.142	44.4762	54.5868	38.2337	52.5171	71.8726	64.4277	64.9908	41.4702	51.1686	55.3075	63.2878	33.4493	55.2433	54.67	40.9905	31.3742	34.03	31.2174	42.1109
			1137.81	62.0654	44.0217	54.349	37.7113	52.2391	71.8516	64.3294	64.8904	41.0438	50.7908	54.9945	63.1007	32.9035	55.0006	54.3092	40.5363	30.736	33.4187	30.5803	41.6012
			1138.3	61.9939	43.583	54.1058	37.2122	51.9567	71.8301	64.2283	64.7934	40.6327	50.4255	54.692	62.9235	32.3695	54.7629	53.9587	40.096	30.115	32.824	29.9635	41.1068
			1138.78	61.9297	43.1615	53.8664	36.7399	51.677	71.8113	64.1258	64.7035	40.2465	50.076	54.4045	62.758	31.8543	54.5376	53.6227	39.674	29.5172	32.2566	29.3697	40.6298
			1139.26	61.8743	42.7575	53.639	36.2947	51.408	71.7969	64.0233	64.6224	39.8907	49.7435	54.134	62.6047	31.3638	54.3302	53.3043	39.2714	28.9472	31.7245	28.8012	40.1707
			1139.74	61.8278	42.3673	53.4275	35.8722	51.1545	71.786	63.9214	64.5479	39.5632	49.4254	53.8779	62.461	30.8984	54.1418	53.0027	38.885	28.4044	31.2284	28.2565	39.7268
			1140.22	61.7878	41.9841	53.2306	35.4643	50.9161	71.7747	63.8188	64.4743	39.2546	49.1153	53.63	62.3213	30.4529	53.9674	52.7128	38.5084	27.8818	30.7616	27.7295	39.2914
			1140.71	61.7508	41.6	53.0436	35.062	50.6882	71.7585	63.7131	64.3945	38.9516	48.8057	53.3827	62.1789	30.0192	53.7987	52.4269	38.1351	27.3686	30.3126	27.212	38.8569
			1141.19	61.7134	41.2094	52.8612	34.6597	50.4651	71.7341	63.6024	64.3035	38.6431	48.4915	53.1301	62.0281	29.5902	53.627	52.1377	37.7612	26.8556	29.8705	26.6968	38.4183
			1141.67	61.6733	40.8118	52.6805	34.2569	50.2427	71.7012	63.4863	64.2	38.324	48.1721	52.8702	61.8665	29.1634	53.4471	51.8416	37.3864	26.3385	29.4289	26.1817	37.9756
			1142.15	61.6291	40.4111	52.5019	33.8577	50.02	71.6622	63.3654	64.0868	37.9965	47.8512	52.605	61.6951	28.7407	53.2582	51.5397	37.0123	25.8194	28.9871	25.6691	37.5338
			1142.63	61.5801	40.0135	52.3276	33.467	49.7983	71.6209	63.2413	63.9692	37.6671	47.5336	52.3383	61.5166	28.3256	53.0632	51.2359	36.6397	25.304	28.5477	25.1638	37.0991
			1143.12	61.5247	39.6232	52.159	33.0861	49.5785	71.5803	63.1147	63.8517	37.3414	47.2214	52.0726	61.3343	27.9189	52.8655	50.9344	36.2664	24.7966	28.1122	24.6682	36.675
			1143.6	61.4608	39.2394	51.9941	32.7103	49.3588	71.5406	62.9853	63.7363	37.0198	46.9116	51.8072	61.1495	27.5162	52.6664	50.6364	35.8872	24.2961	27.6781	24.1795	36.2585
			1144.08	61.3863	38.8563	51.828	32.3298	49.1343	71.4998	62.8516	63.622	36.6968	46.5967	51.5384	60.9618	27.1079	52.4637	50.3398	35.4966	23.7954	27.2382	23.6891	35.8409
			1144.56	61.301	38.4661	51.6544	31.9337	48.899	71.4545	62.713	63.5063	36.3635	46.2683	51.2619	60.7704	26.6838	52.2535	50.0406	35.0921	23.2842	26.7842	23.186	35.411
			1145.05	61.2078	38.063	51.4686	31.5156	48.6491	71.4021	62.5705	63.3874	36.0124	45.9212	50.9761	60.5759	26.238	52.032	49.7354	34.6765	22.7543	26.311	22.6624	34.9613
			1145.53	61.1132	37.6465	51.2701	31.0772	48.3854	71.3428	62.4273	63.2659	35.6422	45.557	50.6832	60.3811	25.7728	51.7985	49.4244	34.2576	22.2042	25.8204	22.1174	34.4915
			1146.01	61.025	37.2214	51.0624	30.6274	48.1137	71.2794	62.2882	63.1444	35.2588	45.1838	50.3895	60.1907	25.2979	51.556	49.1118	33.8449	21.6397	25.3208	21.5577	34.0095
			1146.49	60.9494	36.7959	50.8516	30.179	47.8424	71.2164	62.157	63.026	34.8729	44.813	50.102	60.0086	24.8262	51.3096	48.8036	33.4452	21.0718	24.8239	20.9947	33.5276
			1146.97	60.8884	36.3768	50.6438	29.7424	47.5791	71.1581	62.0352	62.9124	34.4958	44.4539	49.8252	59.8359	24.3682	51.0652	48.5051	33.0597	20.5108	24.3391	20.4391	33.0573
			1147.46	60.8385	35.9667	50.4429	29.3218	47.3272	71.1072	61.9203	62.8026	34.1349	44.1109	49.5592	59.6696	23.9274	50.8265	48.2182	32.6842	19.963	23.8701	19.8969	32.6037
			1147.94	60.7928	35.5642	50.2502	28.9147	47.0854	71.0646	61.8081	62.6941	33.792	43.7821	49.2999	59.504	23.5005	50.5959	47.9415	32.3128	19.4287	23.4146	19.3685	32.165
			1148.42	60.7438	35.1661	50.0669	28.5154	46.8499	71.0298	61.6943	62.5849	33.4654	43.463	49.0424	59.3335	23.0812	50.375	47.6722	31.9429	18.9059	22.9677	18.8512	31.7348
			1148.9	60.6882	34.7722	49.8952	28.1207	46.6179	71.002	61.578	62.476	33.1535	43.1506	48.7849	59.1564	22.666	50.1672	47.4093	31.5791	18.3946	22.5277	18.3442	31.3081
			1149.38	60.6282	34.3881	49.7401	27.7343	46.3905	70.9814	61.4624	62.3724	32.8579	42.847	48.5311	58.977	22.2591	49.9784	47.1561	31.2324	17.9011	22.0995	17.8525	30.8857
			1149.87	60.5709	34.0245	49.6079	27.3668	46.1735	70.9682	61.3545	62.2814	32.584	42.5597	48.2899	58.8043	21.8714	49.8158	46.9194	30.917	17.4373	21.6945	17.3866	30.4762
			1150.35	60.5255	33.6942	49.5035	27.0324	45.9749	70.9622	61.2619	62.2095	32.3386	42.2984	48.0715	58.6494	21.5168	49.6852	46.7068	30.6438	17.0177	21.3263	16.959	30.093
			1150.83	60.4989	33.4065	49.4272	26.743	45.8012	70.9614	61.1898	62.1593	32.1261	42.0701	47.8835	58.5212	21.2057	49.5876	46.5231	30.4162	16.6523	21.0049	16.579	29.7488
			1151.31	60.4929	33.1638	49.374	26.5034	45.6547	70.9622	61.139	62.1276	31.9457	41.8761	47.7276	58.4229	20.9401	49.5179	46.3676	30.2298	16.3435	20.7323	16.2487	29.451
			1151.8	60.5041	32.9616	49.3354	26.3104	45.5325	70.9606	61.1065	62.1073	31.7922	41.7109	47.6	58.3521	20.714	49.4666	46.2349	30.0755	16.0845	20.5028	15.9631	29.1998
			1152.28	60.5263	32.7924	49.3035	26.1564	45.4296	70.9545	61.0879	62.091	31.6595	41.5669	47.4943	58.3031	20.5181	49.4238	46.1183	29.9455	15.8646	20.3073	15.7146	28.991
			1152.76	60.5542	32.6507	49.2756	26.0345	45.3424	70.9452	61.0805	62.075	31.5449	41.4386	47.4065	58.2709	20.3463	49.3843	46.0145	29.8383	15.6755	20.1397	15.499	28.8201
			1153.24	60.586	32.5371	49.2559	25.9435	45.2722	70.9381	61.0857	62.0621	31.4527	41.3273	47.3377	58.254	20.2014	49.3502	45.9267	29.7593	15.5155	20.0013	15.3196	28.687
			1153.72	60.6237	32.4581	49.2539	25.8881	45.2251	70.9409	61.1084	62.0603	31.3927	41.2409	47.2939	58.255	20.0944	49.3298	45.8642	29.7184	15.3911	19.9004	15.1864	28.5969
			1154.21	60.6718	32.4227	49.2799	25.8763	45.2096	70.9611	61.1546	62.0794	31.3761	41.1908	47.283	58.2786	20.0399	49.3344	45.8384	29.7241	15.3126	19.8485	15.1118	28.5571
			1154.69	60.7335	32.4366	49.3396	25.9141	45.2325	71.0032	61.2285	62.1266	31.41	41.186	47.3099	58.3283	20.0484	49.3723	45.8578	29.7795	15.288	19.8529	15.1033	28.5722
			1155.17	60.8084	32.4988	49.4309	26.0012	45.2954	71.0666	61.3294	62.2034	31.4933	41.2293	47.3733	58.4033	20.1211	49.4456	45.9239	29.8807	15.3188	19.9133	15.1593	28.6408
			1155.65	60.8923	32.6013	49.5449	26.1311	45.3941	71.1468	61.4524	62.3052	31.6179	41.3154	47.4658	58.4988	20.2486	49.5492	46.0309	30.0188	15.3992	20.0209	15.2692	28.7544
			1156.13	60.9793	32.7332	49.6694	26.2936	45.5204	71.2374	61.5901	62.4248	31.7724	41.4348	47.5776	58.6075	20.4153	49.6743	46.1687	30.1849	15.5203	20.1631	15.4184	28.9016
			1156.62	61.0645	32.8859	49.7948	26.4803	45.6668	71.3333	61.7356	62.5559	31.9481	41.5779	47.7005	58.7234	20.6069	49.8127	46.328	30.3736	15.6761	20.3305	15.5956	29.0732
			1157.1	61.1466	33.0575	49.9183	26.6874	45.8285	71.4322	61.8852	62.6961	32.1435	41.7395	47.8323	58.8443	20.8161	49.9607	46.5041	30.5841	15.8667	20.5205	15.7972	29.2665
			1157.58	61.2285	33.2524	50.0438	26.9171	46.0049	71.5353	62.0387	62.8475	32.3631	41.92	47.9763	58.9723	21.0439	50.1197	46.698	30.8178	16.0989	20.7382	16.0281	29.4853
			1158.06	61.3157	33.4778	50.1798	27.1735	46.1975	71.6452	62.1983	63.0138	32.6144	42.1228	48.1394	59.112	21.2965	50.2944	46.914	31.0753	16.3807	20.9917	16.2971	29.7369
			1158.55	61.4135	33.7387	50.3346	27.4587	46.4065	71.7641	62.3662	63.1969	32.9017	42.3509	48.3273	59.2676	21.5797	50.4891	47.1553	31.3536	16.7155	21.2864	16.6098	30.0264
			1159.03	61.5251	34.0335	50.5123	27.7697	46.6291	71.8923	62.5432	63.3945	33.2225	42.6029	48.5411	59.44	21.8937	50.7043	47.4209	31.6467	17.0979	21.6204	16.9643	30.3524
			1159.51	61.6503	34.3537	50.7119	28.0989	46.8594	72.0273	62.7284	63.5999	33.5678	42.8727	48.7769	59.6263	22.2323	50.9361	47.7049	31.9479	17.5144	21.9845	17.3504	30.7063
			1159.99	61.7875	34.6877	50.9294	28.4375	47.0908	72.1661	62.9203	63.8045	33.9257	43.1521	49.0281	59.8213	22.5862	51.1788	47.9993	32.2539	17.9481	22.3668	17.7538	31.0755
			1160.47	61.9353	35.0262	51.1608	28.7803	47.3195	72.3059	63.1185	64.0019	34.2874	43.4348	49.2884	60.0202	22.9481	51.4273	48.2976	32.5667	18.3862	22.7582	18.1629	31.4489
			1160.95	62.0941	35.3654	51.4049	29.1281	47.5469	72.4463	63.3244	64.1901	34.6513	43.719	49.5553	60.2206	23.3171	51.6803	48.5983	32.8922	18.8241	23.1565	18.5731	31.821
			1161.44	62.2661	35.7083	51.6638	29.4868	47.7789	72.5885	63.5409	64.373	35.0224	44.0084	49.8299	60.4227	23.6986	51.9406	48.9053	33.2368	19.2663	23.5664	18.9878	32.1931
			1161.92	62.4537	36.0613	51.9408	29.8636	48.0238	72.7351	63.7701	64.5577	35.4088	44.3094	50.115	60.6285	24.101	52.213	49.2252	33.6026	19.7213	23.9949	19.4144	32.5705
			1162.4	62.6576	36.4297	52.2375	30.2616	48.2878	72.8881	64.012	64.7518	35.816	44.6273	50.4117	60.8391	24.5305	52.5012	49.5636	33.9858	20.1957	24.4462	19.8588	32.9586
			1162.88	62.8753	36.8137	52.552	30.6776	48.5734	73.0484	64.2635	64.9604	36.2428	44.9632	50.7179	61.0533	24.9868	52.8061	49.9217	34.3775	20.6892	24.9174	20.3214	33.3584
			1163.37	63.1022	37.2087	52.8792	31.1023	48.8784	73.2159	64.5197	65.1845	36.6813	45.3139	51.0283	61.2677	25.4629	53.1247	50.296	34.7681	21.1943	25.3996	20.7963	33.7667
			1163.85	63.3327	37.6076	53.213	31.5256	49.1992	73.3906	64.7763	65.4228	37.1202	45.6735	51.3375	61.4787	25.9491	53.4528	50.6802	35.1524	21.7002	25.8817	21.2751	34.1777
			1164.33	63.5637	38.0055	53.5497	31.9418	49.5331	73.5732	65.0316	65.6729	37.5508	46.0367	51.6429	61.6853	26.4377	53.7875	51.0689	35.5323	22.1985	26.3566	21.7523	34.5874
			1164.81	63.7953	38.4031	53.8893	32.3529	49.8808	73.7657	65.2879	65.9336	37.9709	46.4016	51.9468	61.8901	26.9273	54.1289	51.4601	35.9157	22.6881	26.8251	22.2293	34.9966
			1165.3	64.031	38.8066	54.2355	32.768	50.2458	73.9701	65.5498	66.2047	38.3858	46.7693	52.2557	62.0996	27.4231	54.4798	51.8561	36.3126	23.1755	27.2955	22.7134	35.4108
			1165.78	64.2754	39.2252	54.5926	33.1994	50.6318	74.187	65.8216	66.4862	38.8057	47.1424	52.5777	62.3218	27.9332	54.8435	52.2606	36.7298	23.6716	27.7793	23.2149	35.8376
			1166.26	64.532	39.6662	54.963	33.6565	51.0395	74.4138	66.1053	66.7763	39.2401	47.5221	52.9181	62.5635	28.464	55.2214	52.6765	37.1682	24.1864	28.2853	23.7406	36.2825
			1166.74	64.8015	40.1316	55.3454	34.1421	51.465	74.6453	66.3988	67.0712	39.6945	47.9075	53.278	62.8275	29.0165	55.6111	53.1023	37.6227	24.7249	28.8158	24.2909	36.7461
			1167.22	65.0819	40.6177	55.7354	34.652	51.9002	74.8748	66.697	67.3652	40.1684	48.2956	53.6539	63.1121	29.5863	56.0072	53.5331	38.0866	25.2865	29.3658	24.8594	37.2237
			1167.7	65.3701	41.1171	56.1286	35.1784	52.3364	75.0966	66.9942	67.6534	40.658	48.6848	54.0408	63.4129	30.1667	56.404	53.9629	38.5564	25.8676	29.9275	25.4372	37.7089
			1168.19	65.6636	41.6231	56.5232	35.715	52.7677	75.3081	67.2876	67.934	41.1596	49.077	54.435	63.7249	30.7533	56.7988	54.3873	39.0346	26.4661	30.4952	26.0187	38.1975
			1168.67	65.962	42.1329	56.9219	36.2604	53.1939	75.5109	67.5779	68.2094	41.6729	49.4796	54.8366	64.0447	31.3476	57.1934	54.8067	39.5291	27.0843	31.0694	26.6049	38.6906
			1169.15	66.2666	42.6484	57.3303	36.8189	53.6195	75.7099	67.8695	68.4857	42.2013	49.9027	55.2484	64.3714	31.9557	57.5933	55.2262	40.0496	27.7281	31.6566	27.204	39.1948
			1169.63	66.5785	43.1744	57.754	37.3973	54.0519	75.911	68.168	68.7698	42.7496	50.356	55.6737	64.7057	32.5857	58.0051	55.6524	40.6015	28.404	32.266	27.8272	39.7189
			1170.12	66.8971	43.7153	58.1952	38	54.497	76.1192	68.4772	69.0665	43.3198	50.8439	56.1128	65.0487	33.2419	58.4329	56.0905	41.1828	29.1136	32.9039	28.4826	40.2696
			1170.6	67.2191	44.2722	58.6505	38.6258	54.9566	76.3365	68.7974	69.3765	43.9084	51.3636	56.5615	65.4	33.9214	58.8752	56.5407	41.7834	29.8508	33.5694	29.1713	40.8481
			1171.08	67.5393	44.8417	59.1115	39.2664	55.4276	76.5619	69.1254	69.696	44.5059	51.9053	57.0114	65.7577	34.6139	59.3252	56.9973	42.388	30.6022	34.2534	29.8853	41.4485
			1171.56	67.852	45.4166	59.5673	39.9091	55.9035	76.7919	69.4553	70.0186	45.099	52.4554	57.4527	66.1182	35.3045	59.7721	57.4504	42.9808	31.3504	34.9416	30.6102	42.0598
			1172.04	68.153	45.988	60.0075	40.5395	56.376	77.0225	69.7814	70.3372	45.6744	53.0003	57.877	66.4771	35.9778	60.204	57.8889	43.548	32.0784	35.6176	31.3293	42.6692
			1172.53	68.4403	46.5459	60.4245	41.1443	56.8367	77.2496	70.0983	70.646	46.221	53.5284	58.2792	66.8292	36.6203	60.6108	58.3032	44.0795	32.7725	36.2667	32.0263	43.2639
			1173.01	68.7136	47.0797	60.8129	41.7117	57.2772	77.4693	70.4018	70.9405	46.731	54.0296	58.6562	67.1676	37.2214	60.9845	58.6862	44.5664	33.4219	36.876	32.6867	43.8317
			1173.49	68.972	47.5761	61.1679	42.2301	57.6874	77.6774	70.6869	71.2168	47.1983	54.4939	59.0047	67.4835	37.7707	61.3191	59.0331	44.9987	34.0159	37.4329	33.2956	44.3599
			1173.97	69.2127	48.0196	61.4834	42.6863	58.0551	77.8694	70.9472	71.4698	47.6158	54.9088	59.318	67.7655	38.2559	61.6094	59.3396	45.3644	34.5412	37.9232	33.8362	44.8329
			1174.45	69.4301	48.3931	61.751	43.0655	58.3665	78.0397	71.1744	71.6932	47.9745	55.2589	59.5857	68.0011	38.6617	61.8504	59.6011	45.6505	34.9804	38.3306	34.2896	45.2328
			1174.94	69.6173	48.6811	61.962	43.3531	58.6083	78.1837	71.3597	71.8802	48.2636	55.5288	59.7949	68.1797	38.972	62.0377	59.8124	45.8467	35.3153	38.6391	34.6367	45.5417
			1175.42	69.7686	48.8742	62.1099	43.5393	58.7722	78.2978	71.4967	72.0249	48.4741	55.7068	59.9347	68.2951	39.1743	62.1692	59.9696	45.9503	35.5318	38.8373	34.864	45.7459
			1175.9	69.8815	48.9725	62.1945	43.6227	58.8576	78.3816	71.5834	72.1255	48.6023	55.79	60.0007	68.3484	39.2653	62.2469	60.0727	45.9686	35.6265	38.9233	34.9681	45.8412
			1176.38	69.9587	48.9869	62.2232	43.6139	58.8735	78.4376	71.6241	72.1848	48.6525	55.7864	59.9981	68.3486	39.2539	62.278	60.1271	45.9191	35.6098	38.9079	34.959	45.8355
			1176.87	70.0076	48.9377	62.211	43.5339	58.8374	78.4709	71.6291	72.2104	48.6376	55.714	59.9419	68.3106	39.1615	62.2748	60.1439	45.8263	35.5062	38.8131	34.8602	45.7492
			1177.35	70.0382	48.8498	62.1776	43.4111	58.7715	78.4878	71.6119	72.2132	48.5772	55.5973	59.854	68.2524	39.0185	62.2529	60.1386	45.7169	35.3496	38.6694	34.7041	45.6116
			1177.83	70.0606	48.7486	62.1436	43.2762	58.6984	78.4951	71.5868	72.2045	48.4936	55.4623	59.7583	68.1914	38.8588	62.2287	60.1275	45.6155	35.1771	38.5088	34.5263	45.4551
			1178.31	70.0833	48.6557	62.1267	43.1563	58.6372	78.499	71.5657	72.1945	48.4083	55.3318	59.6761	68.1418	38.7145	62.2177	60.1255	45.5421	35.0221	38.3609	34.3599	45.3104
			1178.79	70.1126	48.5879	62.1404	43.0734	58.602	78.5052	71.5575	72.1912	48.3399	55.2232	59.624	68.1132	38.6127	62.2329	60.1443	45.513	34.9112	38.2495	34.2327	45.2024
			1179.28	70.1536	48.5594	62.1939	43.0441	58.6032	78.5194	71.5678	72.2016	48.3042	55.15	59.6132	68.1127	38.5751	62.285	60.1931	45.5433	34.8648	38.1938	34.1668	45.1501
			1179.76	70.2121	48.5843	62.2945	43.0825	58.649	78.5475	71.6014	72.2323	48.3159	55.1243	59.6525	68.1464	38.6203	62.3836	60.2799	45.6497	34.8998	38.2106	34.1814	45.169
			1180.24	70.2955	48.6794	62.4485	43.203	58.7489	78.5957	71.6637	72.2908	48.3905	55.1596	59.7507	68.2217	38.7654	62.5376	60.4136	45.8502	35.0331	38.3171	34.2957	45.2732
			1180.72	70.413	48.8636	62.6624	43.4214	58.9132	78.6696	71.7618	72.3859	48.544	55.272	59.9175	68.3476	39.0264	62.7546	60.6042	46.1623	35.2827	38.5309	34.529	45.4772
			1181.2	70.5743	49.155	62.9418	43.7529	59.1528	78.7731	71.9035	72.5256	48.7917	55.478	60.1629	68.5336	39.4159	63.0407	60.8622	46.5992	35.6656	38.8678	34.8988	45.7945
			1181.69	70.787	49.5668	63.2897	44.2098	59.4759	78.9079	72.0957	72.716	49.1446	55.7913	60.4947	68.7871	39.9409	63.3986	61.1955	47.1664	36.194	39.3379	35.4174	46.2355
			1182.17	71.0551	50.1044	63.7059	44.798	59.8868	79.0733	72.343	72.9598	49.608	56.22	60.9167	69.1118	40.6006	63.8277	61.6082	47.8611	36.8725	39.9443	36.0896	46.8051
			1182.65	71.3783	50.7643	64.1869	45.5165	60.3854	79.2676	72.6466	73.2558	50.1811	56.7649	61.428	69.5066	41.3876	64.3248	62.0992	48.6739	37.6971	40.6826	36.9125	47.502
			1183.13	71.7533	51.5369	64.7281	46.3591	60.9684	79.4888	73.0049	73.6007	50.8586	57.4213	62.0237	69.9673	42.2911	64.8856	62.663	49.5922	38.6578	41.544	37.878	48.3205
			1183.62	72.1746	52.4097	65.3249	47.3158	61.6308	79.7358	73.4145	73.99	51.6337	58.1807	62.6973	70.487	43.3006	65.5056	63.2919	50.6025	39.7415	42.519	38.9759	49.2519
			1184.1	72.6359	53.3697	65.9732	48.3749	62.3672	80.008	73.8711	74.4193	52.4996	59.0334	63.4413	71.0582	44.4073	66.1802	63.9767	51.6906	40.9352	43.5992	40.1954	50.2863
			1184.58	73.13	54.4042	66.6689	49.523	63.1706	80.3042	74.3697	74.8838	53.4487	59.9681	64.2472	71.6729	45.6034	66.9026	64.7077	52.8408	42.225	44.7761	41.5239	51.412
			1185.06	73.6484	55.4989	67.4051	50.7432	64.0307	80.6212	74.9039	75.3774	54.4715	60.9711	65.1046	72.3218	46.8789	67.6627	65.4742	54.0343	43.5948	46.0381	42.9444	52.6133
			1185.54	74.181	56.6369	68.1713	52.0147	64.9328	80.9533	75.4655	75.8922	55.5535	62.0253	65.999	72.9941	48.2184	68.4459	66.2639	55.2488	45.0239	47.3676	44.4329	53.8697
			1186.03	74.7167	57.7975	68.9531	53.3125	65.8577	81.293	76.0439	76.418	56.6749	63.1098	66.9123	73.6774	49.6001	69.2347	67.0631	56.4603	46.4861	48.7399	45.958	55.1553
			1186.51	75.245	58.9578	69.7342	54.6096	66.7842	81.6322	76.6271	76.9445	57.8122	64.2019	67.8237	74.359	50.9974	70.0112	67.8577	57.6456	47.9526	50.1254	47.4842	56.4416
			1186.99	75.7573	60.0955	70.4991	55.8806	67.692	81.9646	77.2025	77.4623	58.9408	65.2795	68.7131	75.0269	52.3827	70.761	68.6353	58.7855	49.3949	51.4942	48.9769	57.7008
			1187.47	76.2482	61.1918	71.236	57.1043	68.5654	82.2863	77.7587	77.9647	60.0386	66.3238	69.5635	75.6715	53.7317	71.4753	69.3857	59.8655	50.7894	52.8202	50.4075	58.9094
			1187.95	76.7156	62.2325	71.9371	58.2649	69.394	82.5959	78.2859	78.4478	61.0881	67.3204	70.363	76.2856	55.0253	72.1504	70.1018	60.8764	52.1187	54.0845	51.7564	60.0506
			1188.44	77.159	63.2084	72.5985	59.3516	70.1725	82.8924	78.7767	78.9093	62.0767	68.2584	71.1046	76.8643	56.2497	72.7865	70.7787	61.8119	53.3709	55.2745	53.0126	61.1134
			1188.92	77.5778	64.1136	73.2173	60.357	70.8982	83.1737	79.2256	79.3466	62.9957	69.1293	71.7855	77.4038	57.3942	73.3834	71.4125	62.6675	54.538	56.3825	54.1713	62.0917
			1189.4	77.9704	64.944	73.7907	61.2763	71.5689	83.4352	79.6295	79.7557	63.8389	69.9253	72.4055	77.9011	58.4496	73.9392	71.9989	63.4395	55.6128	57.4029	55.2311	62.9824
			1189.88	78.3334	65.6967	74.3145	62.1061	72.1822	83.6703	79.9871	80.1302	64.6022	70.6396	72.9653	78.354	59.4075	74.4493	72.5335	64.1261	56.5881	58.331	56.1909	63.7841
			1190.37	78.6631	66.3705	74.7841	62.8454	72.7352	83.8719	80.2994	80.4632	65.2836	71.2669	73.467	78.7615	60.2612	74.9074	73.0122	64.7279	57.4578	59.1629	57.0504	64.4964
			1190.85	78.9569	66.9664	75.1967	63.4964	73.2259	84.0353	80.5691	80.7494	65.8842	71.8058	73.9131	79.1249	61.0076	75.3088	73.4334	65.2494	58.2187	59.8974	57.81	65.1214
			1191.33	79.215	67.4888	75.5525	64.0645	73.6553	84.1601	80.8007	80.987	66.4086	72.2603	74.3075	79.4471	61.6499	75.6522	73.7983	65.6989	58.8731	60.537	58.4734	65.6634
			1191.81	79.4404	67.9453	75.8555	64.5584	74.0273	84.2508	80.9989	81.179	66.8655	72.6395	74.6552	79.7328	62.1976	75.9411	74.1119	66.0873	59.4293	61.089	59.0472	66.1294
			1192.29	79.6385	68.3452	76.1136	64.9879	74.349	84.3162	81.1689	81.3329	67.2662	72.9569	74.9614	79.9869	62.6658	76.1833	74.3824	66.4261	59.901	61.5645	59.542	66.5286
			1192.78	79.8152	68.6985	76.336	65.3629	74.6286	84.3667	81.3145	81.4584	67.6224	73.2278	75.2313	80.2133	63.0718	76.389	74.6187	66.7249	60.3043	61.9756	59.9696	66.8706
			1193.26	79.9748	69.013	76.5316	65.6911	74.8743	84.4117	81.4389	81.5652	67.9442	73.4659	75.4682	80.414	63.4315	76.5682	74.829	66.9897	60.6544	62.3332	60.3412	67.1646
			1193.74	80.12	69.2934	76.7073	65.9777	75.0922	84.4579	81.5445	81.6607	68.2381	73.6817	75.6743	80.5894	63.7565	76.7287	75.019	67.2229	60.9622	62.645	60.6656	67.4176
			1194.22	80.2512	69.5414	76.867	66.2254	75.2861	84.5075	81.6333	81.7486	68.5066	73.8808	75.8505	80.7391	64.0526	76.876	75.191	67.4243	61.2338	62.9153	60.948	67.6346
			1194.7	80.3681	69.7566	77.0122	66.4361	75.4584	84.5593	81.7074	81.8295	68.7493	74.0649	75.9978	80.863	64.3205	77.013	75.3447	67.5932	61.4708	63.1462	61.1904	67.8193
			1195.19	80.471	69.9387	77.1433	66.6122	75.6109	84.6101	81.7697	81.902	68.9642	74.2332	76.1183	80.9633	64.5581	77.1416	75.4787	67.7301	61.6731	63.3393	61.3939	67.9745
			1195.67	80.5617	70.0884	77.2609	66.7572	75.7455	84.656	81.8232	81.9646	69.1495	74.3838	76.2161	81.0439	64.7627	77.2629	75.5914	67.8379	61.8412	63.4975	61.5593	68.1036
			1196.15	80.6432	70.2087	77.3655	66.8757	75.8643	84.6941	81.8708	82.0168	69.3046	74.5147	76.2968	81.1103	64.9332	77.3776	75.6827	67.9211	61.9772	63.6249	61.6889	68.2103
			1196.63	80.719	70.3034	77.458	66.9723	75.9692	84.7229	81.9146	82.0591	69.4306	74.6246	76.3659	81.1681	65.07	77.4853	75.7533	67.9844	62.0853	63.7264	61.7863	68.298
			1197.12	80.7915	70.3766	77.5388	67.0499	76.0603	84.7418	81.9552	82.0927	69.5291	74.7118	76.4274	81.2213	65.1751	77.5838	75.805	68.0308	62.1696	63.8053	61.8551	68.3685
			1197.6	80.861	70.4304	77.6077	67.1088	76.1359	84.7514	81.9917	82.1184	69.6013	74.7748	76.4825	81.2709	65.2501	77.6689	75.8389	68.0606	62.2325	63.8621	61.8981	68.4213
			1198.08	80.9256	70.4643	77.6633	67.1468	76.1926	84.7528	82.0222	82.1362	69.6472	74.8113	76.5288	81.3148	65.2958	77.7353	75.8556	68.0718	62.2733	63.8946	61.9167	68.4535
			1198.56	80.982	70.4756	77.7042	67.1596	76.2266	84.7468	82.0446	82.1451	69.6659	74.8197	76.5616	81.3482	65.3115	77.7783	75.8546	68.0603	62.2883	63.8986	61.9101	68.4609
			1199.04	81.0268	70.4604	77.729	67.143	76.235	84.7345	82.0565	82.1433	69.6556	74.7994	76.5753	81.3658	65.2959	77.795	75.835	68.0224	62.2726	63.8699	61.8766	68.4396
			1199.53	81.0577	70.4153	77.7371	67.0941	76.2175	84.7164	82.0567	82.1296	69.615	74.7512	76.5652	81.3626	65.2474	77.7856	75.7961	67.9552	62.2217	63.8063	61.8141	68.3876
			1200.01	81.0738	70.3384	77.7284	67.0123	76.1762	84.6927	82.0439	82.1031	69.5439	74.6775	76.5286	81.3358	65.1652	77.7527	75.7381	67.8573	62.1333	63.7077	61.7201	68.3053
			1200.49	81.076	70.2303	77.7027	66.8987	76.1148	84.6633	82.0175	82.0644	69.4434	74.5816	76.4648	81.2851	65.0489	77.7005	75.6622	67.7282	62.0072	63.5759	61.5924	68.1951
			1200.97	81.0652	70.0931	77.6595	66.7555	76.0368	84.6279	81.9767	82.0142	69.3158	74.466	76.3744	81.2122	64.8979	77.6329	75.5699	67.5678	61.8449	63.4126	61.4281	68.0598
			1201.45	81.0426	69.9296	77.5977	66.5844	75.9443	84.5868	81.9209	81.9542	69.164	74.3321	76.2585	81.1208	64.7116	77.5524	75.4625	67.3755	61.6473	63.2182	61.2241	67.9012
			1201.94	81.0089	69.7429	77.5164	66.3858	75.8375	84.5411	81.85	81.886	68.9905	74.1802	76.1178	81.0148	64.4888	77.4596	75.3411	67.1514	61.4148	62.9917	60.9776	67.7188
			1202.42	80.9647	69.5354	77.4157	66.1593	75.7151	84.4934	81.7647	81.8116	68.7975	74.0096	75.953	80.8984	64.2292	77.3544	75.2064	66.8975	61.1471	62.7317	60.6875	67.5109
			1202.9	80.9115	69.3105	77.2984	65.9055	75.5765	84.4473	81.6668	81.7337	68.5875	73.821	75.7658	80.7753	63.9351	77.2375	75.0594	66.619	60.8447	62.4391	60.3568	67.2761
			1203.38	80.8517	69.0724	77.1699	65.627	75.4231	84.4068	81.5595	81.6559	68.3636	73.617	75.5602	80.6488	63.6124	77.1117	74.9031	66.3258	60.5118	62.1194	59.994	67.0161
			1203.87	80.7891	68.8283	77.038	65.3307	75.2599	84.375	81.4472	81.5824	68.1305	73.4035	75.3433	80.5221	63.2719	76.9825	74.7422	66.0323	60.1571	61.7836	59.6133	66.7371
			1204.35	80.7283	68.5872	76.9115	65.0277	75.0952	84.3536	81.3349	81.5176	67.8951	73.1893	75.1252	80.3989	62.9286	76.8579	74.5838	65.756	59.7951	61.4478	59.2335	66.4507
			1204.83	80.6741	68.3604	76.7989	64.7332	74.9396	84.3421	81.2279	81.4653	67.6663	72.9848	74.918	80.2831	62.6003	76.7467	74.4366	65.5151	59.4443	61.1309	58.876	66.173
			1205.31	80.6306	68.1598	76.7071	64.4642	74.8037	84.338	81.1319	81.4278	67.455	72.8016	74.7341	80.1798	62.3055	76.6575	74.3099	65.326	59.1255	60.8518	58.5616	65.922
			1205.79	80.6015	67.9971	76.6415	64.2384	74.6973	84.3387	81.053	81.4065	67.2736	72.6506	74.5854	80.0952	62.0617	76.5976	74.2123	65.2023	58.8591	60.6269	58.309	65.7155
			1206.28	80.5902	67.8826	76.6062	64.0721	74.6279	84.3423	80.9975	81.4017	67.1357	72.5427	74.4815	80.0364	61.8845	76.5728	74.1509	65.1537	58.6635	60.4696	58.1334	65.569
			1206.76	80.6005	67.8255	76.6055	63.9795	74.6015	84.3491	80.972	81.4137	67.0553	72.4876	74.4303	80.0109	61.787	76.5877	74.1314	65.1856	58.5539	60.3906	58.0469	65.4947
			1207.24	80.6369	67.833	76.6436	63.9714	74.6223	84.3616	80.9824	81.4434	67.0447	72.4934	74.4376	80.0254	61.7794	76.6453	74.1576	65.2989	58.542	60.3974	58.0582	65.5007
			1207.72	80.7036	67.9099	76.7246	64.0536	74.6931	84.3831	81.0325	81.4919	67.1128	72.5654	74.5061	80.0842	61.868	76.7468	74.2309	65.4898	58.6341	60.4947	58.1717	65.5906
			1208.2	80.8033	68.0572	76.8502	64.2262	74.8144	84.4171	81.1226	81.5605	67.2621	72.704	74.6354	80.188	62.0532	76.8908	74.3503	65.7492	58.8301	60.6823	58.3863	65.7623
			1208.69	80.9359	68.2711	77.0186	64.4816	74.9838	84.4648	81.2486	81.6492	67.4873	72.9032	74.8203	80.3327	62.3284	77.0715	74.5118	66.0638	59.1222	60.9533	58.6933	66.008
			1209.17	81.0976	68.5431	77.2237	64.8055	75.1951	84.5255	81.4024	81.7566	67.7756	73.1512	75.0513	80.5105	62.6796	77.28	74.7087	66.4172	59.4946	61.2943	59.0768	66.3141
			1209.65	81.2814	68.8602	77.4557	65.1786	75.4392	84.5961	81.5738	81.8794	68.1085	73.4313	75.3152	80.7113	63.087	77.5046	74.9324	66.7925	59.9255	61.6857	59.5152	66.663
			1210.13	81.4784	69.207	77.7035	65.5793	75.7047	84.6723	81.7523	82.0129	68.4652	73.7258	75.5975	80.9251	63.5282	77.7339	75.1736	67.1744	60.3904	62.1053	59.9845	67.0358
			1210.61	81.6795	69.568	77.9565	65.9873	75.9799	84.7501	81.9296	82.1519	68.827	74.0189	75.8842	81.1436	63.9814	77.9585	75.4232	67.5501	60.8655	62.5321	60.4617	67.4146
			1211.1	81.877	69.9289	78.2065	66.3857	76.2543	84.8262	82.1	82.291	69.1791	74.2998	76.1641	81.3607	64.4284	78.173	75.6735	67.91	61.3311	62.9492	60.9283	67.7848
			1211.58	82.0652	70.2776	78.4486	66.7627	76.5194	84.8983	82.2606	82.4252	69.5115	74.5628	76.429	81.5722	64.8554	78.3756	75.9178	68.2469	61.7728	63.3453	61.371	68.1358
			1212.06	82.2406	70.6046	78.68	67.1108	76.7695	84.965	82.4102	82.55	69.819	74.8068	76.6741	81.7745	65.2535	78.5675	76.1507	68.555	62.1816	63.7148	61.7816	68.4612
			1212.54	82.4009	70.9033	78.8994	67.4265	77.001	85.0249	82.5473	82.6618	70.0989	75.0331	76.8968	81.9633	65.6171	78.7505	76.3675	68.8297	62.5528	64.0554	62.1556	68.7573
			1213.03	82.545	71.1691	79.1051	67.7088	77.212	85.0772	82.6705	82.758	70.3502	75.2434	77.0954	82.1339	65.9436	78.9253	76.5645	69.0677	62.885	64.3668	62.4911	69.0227
			1213.51	82.6722	71.4006	79.295	67.9581	77.4022	85.1213	82.7774	82.8371	70.572	75.4381	77.2693	82.2815	66.2323	79.0909	76.7393	69.2677	63.1785	64.6487	62.7873	69.2573
			1213.99	82.7828	71.5986	79.4667	68.176	77.572	85.1574	82.8667	82.8992	70.7645	75.6164	77.4181	82.4031	66.4845	79.2448	76.8913	69.4316	63.4356	64.9004	63.045	69.4623
			1214.47	82.8785	71.7666	79.618	68.3648	77.7227	85.1863	82.938	82.9463	70.9287	75.7769	77.5431	82.4988	66.7034	79.3843	77.0219	69.5643	63.6603	65.1219	63.2666	69.6404
			1214.95	82.9622	71.9104	79.7481	68.528	77.8562	85.2094	82.9938	82.9816	71.0677	75.9185	77.647	82.5722	66.894	79.5079	77.1342	69.6734	63.8582	65.3146	63.4568	69.7962
			1215.43	83.0379	72.0369	79.8578	68.6697	77.9745	85.228	83.0385	83.0088	71.1864	76.0412	77.7348	82.6299	67.0626	79.6159	77.2327	69.768	64.036	65.4818	63.6224	69.9354
			1215.92	83.1099	72.153	79.949	68.7948	78.0793	85.2428	83.0781	83.0318	71.2915	76.1464	77.8126	82.6802	67.2153	79.7111	77.3221	69.8571	64.2007	65.6286	63.7712	70.0643
			1216.4	83.1821	72.2645	80.0249	68.9086	78.1721	85.2535	83.1186	83.0532	71.3893	76.2366	77.8866	82.7306	67.3571	79.7971	77.4064	69.9475	64.3577	65.7609	63.9106	70.1886
			1216.88	83.2565	72.3754	80.0891	69.0155	78.2541	85.2594	83.1646	83.0747	71.4856	76.3146	77.9617	82.7865	67.4909	79.8782	77.4885	70.0434	64.5099	65.8842	64.0467	70.3121
			1217.36	83.3333	72.4872	80.1454	69.1196	78.3267	85.2598	83.2181	83.0971	71.584	76.3832	78.0406	82.8502	67.6174	79.9578	77.5702	70.1466	64.6574	66.0023	64.1828	70.4366
			1217.85	83.4116	72.5999	80.1975	69.2236	78.3921	85.2549	83.2789	83.1204	71.6862	76.4453	78.1237	82.9214	67.7362	80.0381	77.6526	70.257	64.7986	66.1175	64.3203	70.5622
			1218.33	83.4898	72.7123	80.2494	69.3295	78.4535	85.2463	83.3447	83.1452	71.7925	76.5039	78.2093	82.9982	67.8471	80.1203	77.7366	70.3739	64.9315	66.2312	64.4591	70.6881
			1218.81	83.567	72.8236	80.3051	69.4386	78.5152	85.2371	83.4123	83.172	71.9025	76.5622	78.2956	83.0785	67.951	80.205	77.8236	70.4966	65.0558	66.3441	64.5985	70.8136
			1219.29	83.6426	72.9332	80.3679	69.5512	78.5817	85.2302	83.478	83.2015	72.0156	76.6234	78.3811	83.1607	68.0504	80.2924	77.9148	70.6241	65.1736	66.4575	64.7382	70.939
			1219.78	83.7172	73.0415	80.4397	69.6665	78.6566	85.228	83.5388	83.2336	72.1312	76.6899	78.4653	83.244	68.1487	80.3826	78.0111	70.755	65.2887	66.5729	64.8777	71.0646
			1220.26	83.7911	73.1487	80.5203	69.7829	78.7412	85.231	83.5922	83.267	72.2485	76.7629	78.5487	83.3278	68.2487	80.4752	78.1128	70.8868	65.4055	66.6915	65.0165	71.191
			1220.74	83.8645	73.2551	80.6077	69.8979	78.8342	85.238	83.637	83.2996	72.3663	76.8413	78.6321	83.4112	68.3522	80.5694	78.2189	71.0165	65.5274	66.8138	65.1532	71.3176
			1221.22	83.9364	73.3606	80.6982	70.0085	78.9321	85.2464	83.6731	83.3288	72.4833	76.9228	78.7156	83.4923	68.4587	80.6637	78.328	71.1412	65.6555	66.9394	65.2863	71.4428
			1221.7	84.0058	73.4647	80.7881	70.1122	79.0305	85.2536	83.7014	83.3529	72.5982	77.0046	78.7983	83.5693	68.567	80.7563	78.4387	71.2591	65.7886	67.0672	65.4147	71.5645
			1222.18	84.0716	73.5667	80.8748	70.2077	79.1253	85.2576	83.724	83.3719	72.7102	77.0848	78.8788	83.6403	68.6755	80.8457	78.55	71.37	65.9242	67.1964	65.5382	71.6809
			1222.67	84.1334	73.6665	80.9572	70.2951	79.2142	85.2578	83.7432	83.3876	72.8195	77.1628	78.9552	83.7043	68.7835	80.9309	78.6616	71.4759	66.0595	67.3263	65.6582	71.7914
			1223.15	84.1918	73.7637	81.0358	70.376	79.2967	85.254	83.7615	83.4032	72.9266	77.2397	79.0263	83.7617	68.8915	81.0115	78.7735	71.5797	66.1925	67.4568	65.7773	71.897
			1223.63	84.2478	73.8586	81.1116	70.4524	79.3738	85.2464	83.7808	83.4219	73.0321	77.3175	79.0918	83.8139	69.0004	81.0877	78.8849	71.6837	66.3226	67.5875	65.8981	71.9994
			1224.11	84.3024	73.9509	81.1847	70.526	79.4466	85.2344	83.8014	83.4454	73.1355	77.3975	79.1521	83.8631	69.1103	81.1602	78.9933	71.789	66.4494	67.717	66.0221	72.1001
			1224.6	84.356	74.0405	81.2543	70.5977	79.5154	85.2177	83.8226	83.4732	73.2353	77.4799	79.2083	83.911	69.22	81.2289	79.0952	71.894	66.5726	67.8424	66.1487	72.1989
			1225.08	84.4077	74.1268	81.3182	70.6669	79.5798	85.1957	83.8427	83.5026	73.3286	77.563	79.2613	83.9586	69.3264	81.2943	79.1862	71.9952	66.6907	67.9597	66.2752	72.2941
			1225.56	84.4561	74.2093	81.3742	70.7323	79.6387	85.1693	83.86	83.5298	73.4128	77.6442	79.3113	84.0057	69.4255	81.3563	79.2627	72.0888	66.8018	68.065	66.3977	72.3823
			1226.04	84.4993	74.2877	81.4212	70.7925	79.6912	85.1406	83.8732	83.5514	73.4859	77.721	79.3573	84.0514	69.514	81.4152	79.3229	72.1711	66.9039	68.1559	66.5127	72.46
			1226.52	84.5366	74.3618	81.4594	70.8463	79.7373	85.1131	83.8824	83.5655	73.5477	77.7921	79.3982	84.0948	69.59	81.4716	79.3681	72.2405	66.9955	68.2321	66.6178	72.5251
			1227.01	84.5682	74.4316	81.4907	70.8935	79.7781	85.0902	83.8884	83.5721	73.5995	77.8571	79.4324	84.1346	69.654	81.5256	79.4014	72.2969	67.0761	68.2961	66.7119	72.5777
			1227.49	84.5954	74.4966	81.5174	70.9344	79.8149	85.0741	83.8926	83.5723	73.6435	77.9162	79.4594	84.1702	69.7075	81.577	79.4271	72.3415	67.1464	68.3513	66.7948	72.6201
			1227.97	84.6199	74.5556	81.5406	70.9692	79.8484	85.0645	83.8961	83.5673	73.6813	77.9688	79.4794	84.201	69.7525	81.6244	79.4486	72.3758	67.2068	68.4005	66.8656	72.6558
			1228.45	84.6429	74.6069	81.5595	70.9981	79.8777	85.0591	83.8992	83.5576	73.713	78.0132	79.4939	84.2266	69.7895	81.6651	79.4672	72.4005	67.2571	68.4446	66.9224	72.6877
			1228.93	84.6643	74.6482	81.5716	71.0202	79.9005	85.0537	83.9011	83.5427	73.737	78.0461	79.5046	84.2462	69.8173	81.6959	79.4819	72.4156	67.2955	68.4816	66.9622	72.7173
			1229.42	84.6825	74.6774	81.5737	71.0344	79.9137	85.0447	83.9006	83.5218	73.7505	78.0642	79.5135	84.259	69.833	81.7141	79.4902	72.4207	67.3198	68.5076	66.982	72.7437
			1229.9	84.6949	74.6933	81.5633	71.0391	79.9149	85.0303	83.8962	83.4944	73.7508	78.0649	79.5215	84.2642	69.8337	81.7183	79.4899	72.415	67.3273	68.5185	66.9801	72.7643
			1230.38	84.6989	74.6955	81.5408	71.0335	79.9038	85.0111	83.8867	83.4616	73.7364	78.0485	79.5282	84.2615	69.8178	81.7093	79.48	72.3987	67.3169	68.5117	66.9575	72.7758
			1230.86	84.6932	74.6843	81.509	71.0169	79.8825	84.9893	83.8715	83.426	73.7083	78.0176	79.5316	84.2508	69.7855	81.6898	79.4619	72.3721	67.2892	68.4871	66.9182	72.7754
			1231.35	84.6776	74.6609	81.4727	70.9892	79.8548	84.9682	83.8504	83.3915	73.669	77.9768	79.5284	84.2328	69.7391	81.6632	79.4385	72.3359	67.2463	68.4473	66.8672	72.7616
			1231.83	84.654	74.6262	81.4367	70.9506	79.8247	84.9496	83.8235	83.3614	73.6223	77.9307	79.5149	84.2082	69.6817	81.6325	79.4128	72.2905	67.1912	68.396	66.8093	72.7337
			1232.31	84.6251	74.5805	81.4041	70.9006	79.7948	84.9336	83.7908	83.3376	73.571	77.8816	79.4878	84.1778	69.6154	81.5993	79.3863	72.2352	67.1257	68.3364	66.7465	72.6919
			1232.79	84.5939	74.5238	81.3746	70.8385	79.7651	84.9185	83.7521	83.3192	73.5164	77.8291	79.4454	84.1423	69.5407	81.5626	79.3578	72.1686	67.05	68.2695	66.6775	72.6359
			1233.27	84.5623	74.4556	81.3451	70.7633	79.7326	84.9016	83.7077	83.3034	73.4573	77.7701	79.3878	84.1025	69.4563	81.5204	79.3235	72.0893	66.9624	68.1941	66.5984	72.565
			1233.76	84.5309	74.3758	81.3109	70.6748	79.6932	84.8809	83.6584	83.2858	73.3914	77.7005	79.3174	84.059	69.3598	81.4702	79.2785	71.9968	66.8606	68.1074	66.5044	72.4786
			1234.24	84.499	74.2849	81.2677	70.5734	79.6426	84.8557	83.6055	83.2625	73.3156	77.6176	79.2378	84.0125	69.2495	81.4105	79.2183	71.8921	66.7427	68.0067	66.3923	72.3767
			1234.72	84.4651	74.184	81.213	70.4607	79.5784	84.8269	83.5512	83.2307	73.2279	77.5214	79.1533	83.9638	69.1253	81.3419	79.141	71.7778	66.6089	67.8906	66.2622	72.2605
			1235.2	84.4275	74.0747	81.147	70.3395	79.5002	84.7964	83.4972	83.1897	73.1278	77.4153	79.0675	83.9132	68.9889	81.2667	79.0476	71.6572	66.4615	67.7599	66.1173	72.1331
			1235.68	84.3852	73.9583	81.0714	70.2123	79.4098	84.7655	83.4454	83.1404	73.0161	77.3045	78.9826	83.8606	68.8435	81.1883	78.942	71.5337	66.3047	67.617	65.9632	71.9983
			1236.17	84.3382	73.8359	80.9889	70.0812	79.3097	84.7351	83.3965	83.0849	72.8951	77.1945	78.8988	83.8047	68.6924	81.1093	78.829	71.4097	66.1426	67.4651	65.8051	71.86
			1236.65	84.2877	73.7082	80.9017	69.9473	79.2031	84.7047	83.3509	83.0253	72.7673	77.0889	78.8152	83.7437	68.538	81.0309	78.7137	71.2865	65.9785	67.3071	65.6467	71.7211
			1237.13	84.2359	73.576	80.8111	69.8107	79.0928	84.6737	83.3083	82.9638	72.6355	76.9886	78.7305	83.6762	68.3818	80.9528	78.5996	71.1643	65.8142	67.1454	65.4891	71.5833
			1237.61	84.185	73.441	80.7178	69.6715	78.9817	84.6419	83.2685	82.9026	72.5025	76.8923	78.6442	83.6016	68.2245	80.8735	78.4888	71.0433	65.6504	66.9818	65.3314	71.4473
			1238.1	84.137	73.3056	80.6231	69.5299	78.8731	84.6105	83.2317	82.8432	72.3712	76.7978	78.5567	83.5207	68.0673	80.7921	78.3825	70.9238	65.4875	66.8179	65.1726	71.3134
			1238.58	84.0927	73.1734	80.5289	69.3871	78.771	84.5814	83.1976	82.7878	72.2445	76.7036	78.4697	83.4364	67.9122	80.7089	78.2811	70.806	65.3265	66.6562	65.0126	71.1827
			1239.06	84.0515	73.0478	80.4383	69.2448	78.6797	84.5566	83.1655	82.7377	72.1247	76.6096	78.3848	83.3525	67.7615	80.6261	78.1853	70.6903	65.1691	66.4989	64.8524	71.0563
			1239.54	84.0114	72.9311	80.3545	69.1046	78.6018	84.5372	83.1337	82.6941	72.0128	76.5171	78.3031	83.2727	67.6176	80.5465	78.0953	70.5759	65.0169	66.348	64.6944	70.9354
			1240.02	83.9697	72.8239	80.2797	68.9671	78.5377	84.5226	83.0996	82.6572	71.908	76.4277	78.224	83.1999	67.4812	80.4732	78.0108	70.4613	64.8706	66.2037	64.5403	70.8202
			1240.51	83.9237	72.7253	80.214	68.8323	78.4846	84.5109	83.0601	82.6261	71.8081	76.3424	78.1455	83.1348	67.3512	80.4079	77.9305	70.3447	64.7294	66.065	64.3912	70.7094
			1240.99	83.8724	72.633	80.1556	68.6991	78.4373	84.4996	83.0133	82.5994	71.7103	76.261	78.0652	83.0764	67.2251	80.3508	77.8524	70.225	64.5913	65.9296	64.2466	70.6007
			1241.47	83.8165	72.5453	80.1015	68.5669	78.3897	84.4872	82.959	82.5758	71.6125	76.182	77.9813	83.0228	67.1002	80.3003	77.7744	70.1028	64.4544	65.7956	64.1055	70.492
			1241.95	83.7591	72.4612	80.0487	68.436	78.3369	84.4735	82.8996	82.5543	71.5148	76.1034	77.8941	82.9717	66.9751	80.2543	77.6951	69.9806	64.318	65.6623	63.9675	70.3825
			1242.43	83.7048	72.3806	79.9951	68.308	78.2768	84.46	82.8393	82.5345	71.4195	76.0239	77.8057	82.922	66.8505	80.2111	77.6146	69.8627	64.183	65.5308	63.8328	70.2736
			1242.92	83.6583	72.3043	79.9406	68.1858	78.2108	84.4488	82.7833	82.5162	71.3303	75.9433	77.72	82.8736	66.7285	80.1697	77.5342	69.754	64.0521	65.4038	63.7028	70.1685
			1243.4	83.6231	72.2327	79.8861	68.0723	78.1422	84.441	82.736	82.4988	71.251	75.8627	77.6409	82.8275	66.612	80.13	77.4564	69.6584	63.9284	65.2845	63.5791	70.0716
			1243.88	83.6003	72.1655	79.8337	67.9702	78.0757	84.4362	82.6997	82.4814	71.1837	75.7842	77.5715	82.7852	66.5029	80.093	77.3836	69.5784	63.8142	65.1754	63.4634	69.9866
			1244.36	83.5886	72.1019	79.7851	67.8815	78.0153	84.4323	82.6743	82.4628	71.1281	75.7106	77.5136	82.7483	66.402	80.0594	77.318	69.5151	63.7104	65.0781	63.3566	69.9159
			1244.85	83.5851	72.0419	79.7424	67.8077	77.9635	84.4265	82.6584	82.4421	71.0821	75.645	77.4675	82.7184	66.3093	80.0306	77.261	69.4688	63.6173	64.9939	63.2605	69.8601
			1245.33	83.5867	71.9872	79.7073	67.751	77.9222	84.4168	82.6501	82.4202	71.0434	75.5914	77.4333	82.6965	66.2257	80.0077	77.2143	69.4401	63.5361	64.9252	63.1782	69.8191
			1245.81	83.5915	71.9421	79.682	67.714	77.8927	84.4035	82.6484	82.3994	71.0112	75.554	77.4117	82.6842	66.154	79.9924	77.1796	69.4305	63.4699	64.876	63.1152	69.793
			1246.29	83.5992	71.9126	79.6693	67.6998	77.877	84.3891	82.6539	82.384	70.9872	75.5371	77.404	82.6823	66.1	79.9866	77.1595	69.4413	63.4248	64.8513	63.0782	69.7835
			1246.77	83.6112	71.9048	79.6716	67.7111	77.8779	84.3779	82.668	82.3786	70.9752	75.5441	77.4119	82.6918	66.0705	79.9922	77.157	69.4734	63.4077	64.8562	63.0739	69.7929
			1247.26	83.6291	71.9224	79.6903	67.7481	77.8975	84.3742	82.6919	82.3867	70.9792	75.576	77.4361	82.7125	66.0718	80.0107	77.174	69.5255	63.4247	64.893	63.1058	69.8233
			1247.74	83.654	71.9657	79.7248	67.8081	77.9359	84.3808	82.7255	82.4095	71.002	75.6308	77.4754	82.7435	66.1064	80.042	77.2106	69.5943	63.4775	64.9594	63.1724	69.8751
			1248.22	83.6857	72.0303	79.772	67.8854	77.991	84.3982	82.7668	82.4451	71.0431	75.7031	77.5265	82.7829	66.172	80.0846	77.2645	69.6749	63.5625	65.0486	63.2669	69.946
			1248.7	83.7224	72.1089	79.8271	67.9727	78.0575	84.4244	82.8118	82.4893	71.0995	75.7853	77.5846	82.8282	66.2616	80.1357	77.3311	69.7618	63.671	65.1507	63.3787	70.0308
			1249.18	83.7613	72.1931	79.8849	68.0628	78.1285	84.4559	82.8559	82.5367	71.1656	75.8696	77.6444	82.8773	66.3653	80.1915	77.4045	69.8504	63.791	65.2552	63.4963	70.1228
			1249.67	83.7996	72.2758	79.9411	68.1505	78.1972	84.4891	82.895	82.5825	71.236	75.9497	77.7012	82.9283	66.4725	80.2484	77.4788	69.9367	63.9109	65.3539	63.6103	70.215
			1250.15	83.8349	72.352	79.9935	68.2326	78.2581	84.5214	82.9262	82.6237	71.3061	76.0218	77.7521	82.9798	66.575	80.3031	77.5489	70.018	64.0219	65.4424	63.7155	70.3016
			1250.63	83.866	72.4193	80.0417	68.308	78.3086	84.5512	82.9486	82.6591	71.3734	76.085	77.7954	83.0304	66.667	80.3533	77.6114	70.0912	64.1192	65.5196	63.8103	70.3783
			1251.11	83.8923	72.4767	80.0866	68.3759	78.3482	84.578	82.9627	82.6892	71.4365	76.14	77.8302	83.0781	66.7457	80.3971	77.6639	70.1529	64.2019	65.5862	63.895	70.4424
			1251.6	83.9138	72.5234	80.1287	68.4351	78.3778	84.602	82.9701	82.715	71.4947	76.1881	77.8562	83.1204	66.8102	80.4335	77.705	70.1996	64.2712	65.6429	63.9704	70.492
			1252.08	83.9304	72.5587	80.1675	68.4828	78.3987	84.6232	82.9726	82.7369	71.5465	76.2297	77.8729	83.154	66.8599	80.4618	77.7335	70.2281	64.3286	65.6886	64.035	70.5255
			1252.56	83.9424	72.582	80.2009	68.5162	78.4119	84.6413	82.9723	82.755	71.5899	76.2641	77.8803	83.1766	66.8947	80.4819	77.7487	70.2375	64.3748	65.7214	64.0858	70.542
			1253.04	83.9499	72.5939	80.2261	68.5333	78.4179	84.6561	82.9708	82.7686	71.6222	76.2897	77.8795	83.1872	66.915	80.4947	77.7507	70.23	64.4096	65.7391	64.1195	70.5417
			1253.52	83.9536	72.5968	80.2411	68.5345	78.4171	84.6674	82.9699	82.7771	71.6421	76.3055	77.8731	83.1866	66.922	80.5019	77.7411	70.2108	64.4326	65.7421	64.1342	70.5271
			1254.01	83.9548	72.5952	80.2454	68.523	78.4113	84.6754	82.971	82.7806	71.6497	76.3117	77.8652	83.1781	66.9187	80.5064	77.7228	70.1871	64.4445	65.7334	64.1313	70.5029
			1254.49	83.9551	72.5946	80.2409	68.5045	78.4032	84.6807	82.9748	82.7799	71.6477	76.31	77.8603	83.1659	66.9092	80.5112	77.7004	70.1664	64.4476	65.7191	64.1156	70.4758
			1254.97	83.956	72.6	80.2316	68.4856	78.3964	84.6839	82.9813	82.7766	71.6404	76.3035	77.8623	83.1547	66.8978	80.5186	77.6792	70.1542	64.4458	65.7067	64.094	70.4534
			1255.45	83.9587	72.6142	80.2222	68.472	78.3946	84.6859	82.9894	82.7727	71.6332	76.2959	77.873	83.1476	66.8882	80.5302	77.664	70.1527	64.4439	65.7023	64.074	70.4416
			1255.93	83.9637	72.6375	80.2169	68.4676	78.4002	84.6873	82.9976	82.77	71.6309	76.2905	77.8921	83.1466	66.8829	80.5459	77.6586	70.1619	64.4464	65.7096	64.0615	70.4441
			1256.42	83.9709	72.6678	80.2189	68.4738	78.4141	84.689	83.0048	82.7699	71.6371	76.2898	77.9177	83.152	66.8832	80.5649	77.6651	70.1804	64.4571	65.7294	64.0602	70.462
			1256.9	83.9803	72.7026	80.2297	68.4915	78.4362	84.6924	83.0108	82.7737	71.6545	76.2962	77.948	83.1639	66.8907	80.5864	77.6849	70.2075	64.4792	65.7606	64.0721	70.4943
			1257.38	83.992	72.7405	80.2497	68.5214	78.4656	84.6994	83.0174	82.783	71.685	76.3118	77.9821	83.1827	66.9081	80.6108	77.7188	70.2443	64.5157	65.8025	64.0989	70.5394
			1257.86	84.0072	72.7823	80.2795	68.5657	78.5024	84.7123	83.0276	82.7993	71.7304	76.3391	78.0213	83.2102	66.9402	80.6397	77.7678	70.2939	64.5702	65.8559	64.1429	70.5966
			1258.34	84.0274	72.8309	80.32	68.6275	78.5475	84.7336	83.0455	82.8246	71.7926	76.3807	78.068	83.2485	66.9925	80.6762	77.8328	70.36	64.6462	65.9232	64.2068	70.6662
			1258.83	84.0544	72.8901	80.372	68.7098	78.6023	84.7645	83.0743	82.8602	71.8728	76.4387	78.1252	83.2999	67.07	80.7234	77.9144	70.4454	64.7463	66.0081	64.2932	70.7489
			1259.31	84.0898	72.9629	80.4366	68.8142	78.6684	84.8051	83.1162	82.9069	71.9711	76.5134	78.1943	83.3656	67.1748	80.7839	78.0122	70.5508	64.8713	66.1132	64.4029	70.8451
			1259.79	84.1345	73.0508	80.5135	68.9398	78.7459	84.854	83.1713	82.9638	72.0857	76.6034	78.2748	83.4447	67.305	80.8584	78.1242	70.6747	65.0191	66.2389	64.534	70.9543
			1260.27	84.1886	73.1533	80.6011	69.0831	78.8332	84.9085	83.2383	83.0292	72.2127	76.7053	78.3645	83.5351	67.455	80.9455	78.2474	70.8141	65.1852	66.3829	64.6824	71.0745
			1260.76	84.2518	73.2686	80.6965	69.2391	78.9273	84.9654	83.3149	83.1008	72.3475	76.8153	78.4606	83.6333	67.6175	81.0423	78.3779	70.966	65.3633	66.5413	64.8433	71.2034
			1261.24	84.3239	73.3952	80.7961	69.4031	79.0249	85.0222	83.399	83.1762	72.4858	76.9301	78.5614	83.7363	67.7859	81.1452	78.5124	71.1285	65.5476	66.7102	65.0131	71.3394
			1261.72	84.4043	73.532	80.8966	69.572	79.1238	85.0771	83.4887	83.2542	72.6249	77.0483	78.6669	83.8413	67.9565	81.251	78.6487	71.3001	65.7336	66.8871	65.1903	71.4825
			1262.2	84.4919	73.6785	80.9955	69.744	79.2233	85.1294	83.582	83.3342	72.7643	77.1706	78.7788	83.9463	68.1293	81.3575	78.7856	71.4796	65.9195	67.071	65.3765	71.6338
			1262.68	84.5851	73.8341	81.0919	69.919	79.3247	85.1794	83.6767	83.4166	72.9052	77.2991	78.8988	84.0495	68.3064	81.4635	78.9227	71.6649	66.1052	67.2626	65.5742	71.7943
			1263.17	84.6809	73.9968	81.1859	70.0968	79.4301	85.2278	83.7696	83.5021	73.0501	77.4359	79.0277	84.1487	68.491	81.5689	79.0601	71.8528	66.2919	67.4622	65.7854	71.9644
			1263.65	84.7756	74.1631	81.2786	70.2769	79.5414	85.2759	83.8574	83.5911	73.2013	77.5821	79.1637	84.2415	68.6847	81.6741	79.1973	72.0392	66.4812	67.6693	66.0104	72.1424
			1264.13	84.8654	74.3287	81.3716	70.4579	79.6594	85.325	83.9371	83.6835	73.3602	77.7377	79.303	84.3257	68.8866	81.7797	79.3341	72.2211	66.6745	67.8819	66.2467	72.3251
			1264.61	84.9473	74.4901	81.4663	70.6386	79.783	85.3764	84.0078	83.7783	73.5269	77.9008	79.4408	84.4006	69.0939	81.8867	79.4705	72.3975	66.8732	68.0975	66.4907	72.5088
			1265.09	85.0206	74.6456	81.5642	70.818	79.9102	85.4313	84.0708	83.8739	73.7005	78.0688	79.5725	84.4678	69.3028	81.9963	79.6071	72.5702	67.079	68.3137	66.738	72.6909
			1265.58	85.0866	74.7965	81.6663	70.9964	80.0385	85.4901	84.1298	83.9682	73.8789	78.239	79.6962	84.5316	69.5095	82.1095	79.7451	72.7435	67.2936	68.5291	66.9857	72.8709
			1266.06	85.1489	74.9469	81.7734	71.1751	80.1657	85.5528	84.1897	84.0591	74.06	78.4092	79.8124	84.5981	69.7121	82.2272	79.8863	72.9223	67.5189	68.7436	67.2322	73.051
			1266.54	85.2117	75.1018	81.8853	71.3557	80.291	85.6183	84.2549	84.145	74.2416	78.5776	79.924	84.6735	69.91	82.3498	80.0322	73.1097	67.7557	68.9581	67.4779	73.2347
			1267.02	85.279	75.2654	82.0015	71.5396	80.4146	85.685	84.3275	84.2249	74.4218	78.7428	80.0347	84.7621	70.104	82.4768	80.183	73.3061	68.0032	69.1733	67.7233	73.4254
			1267.51	85.3526	75.4398	82.1207	71.7271	80.5377	85.7517	84.4066	84.2994	74.599	78.9041	80.1478	84.8652	70.2958	82.607	80.3374	73.509	68.2589	69.3896	67.9691	73.6249
			1267.99	85.4324	75.6243	82.2412	71.9177	80.6616	85.8174	84.4891	84.3702	74.7725	79.0607	80.2649	84.9803	70.4867	82.7389	80.4927	73.7137	68.5186	69.6069	68.215	73.8331
			1268.47	85.5166	75.8162	82.3611	72.1109	80.7874	85.8822	84.5709	84.4404	74.942	79.2124	80.3866	85.1024	70.6782	82.871	80.6458	73.9159	68.7778	69.8248	68.4607	74.0476
			1268.95	85.6026	76.0119	82.4791	72.3062	80.9156	85.9467	84.649	84.5132	75.1082	79.3594	80.5122	85.2257	70.8715	83.0022	80.7938	74.1131	69.0326	70.0437	68.7059	74.2657
			1269.43	85.6884	76.2085	82.594	72.5044	81.0459	86.0113	84.7227	84.5918	75.2724	79.5032	80.6414	85.3457	71.0681	83.1321	80.9352	74.3055	69.2805	70.2647	68.951	74.4851
			1269.92	85.7734	76.404	82.7054	72.7069	81.1778	86.0763	84.7938	84.6777	75.436	79.6456	80.7746	85.4604	71.2695	83.2603	81.0698	74.4957	69.5212	70.4892	69.1972	74.7047
			1270.4	85.8586	76.598	82.8134	72.9151	81.31	86.1402	84.8659	84.7704	75.6004	79.789	80.9126	85.5704	71.4763	83.3866	81.1991	74.6869	69.7557	70.7183	69.4454	74.9244
			1270.88	85.9457	76.7898	82.9181	73.1289	81.4411	86.201	84.9426	84.8676	75.7658	79.9352	81.0564	85.678	71.6879	83.5102	81.3248	74.8812	69.9852	70.9514	69.6953	75.1446
			1271.36	86.0363	76.9788	83.0202	73.3466	81.569	86.2561	85.0259	84.9655	75.9318	80.0848	81.2053	85.7863	71.9021	83.6296	81.4485	75.0786	70.2108	71.1861	69.9451	75.3645
			1271.84	86.1307	77.163	83.1198	73.5644	81.6918	86.3033	85.1153	85.0601	76.0968	80.237	81.3573	85.897	72.1152	83.7435	81.571	75.277	70.4323	71.4185	70.1914	75.5819
			1272.33	86.2276	77.3403	83.2173	73.7778	81.8077	86.3419	85.2086	85.1484	76.2589	80.3896	81.5088	86.01	72.3229	83.8509	81.6921	75.4729	70.6487	71.6444	70.4302	75.7937
			1272.81	86.3245	77.5087	83.3127	73.9824	81.9155	86.3723	85.3021	85.2293	76.4166	80.5397	81.6552	86.1235	72.5219	83.9519	81.8113	75.6634	70.859	71.8607	70.6584	75.9964
			1273.29	86.4184	77.6676	83.406	74.1755	82.0149	86.3964	85.3927	85.3029	76.5691	80.6843	81.7927	86.2344	72.7103	84.0475	81.9282	75.8467	71.0626	72.0662	70.8748	76.1878
			1273.77	86.5066	77.8176	83.4968	74.3562	82.1067	86.4162	85.4785	85.3704	76.7163	80.8215	81.9189	86.34	72.8885	84.1399	82.0425	76.0228	71.2599	72.2619	71.0808	76.3675
			1274.26	86.588	77.9606	83.5844	74.5253	82.1927	86.4334	85.5585	85.4327	76.8586	80.9499	82.0332	86.4379	73.058	84.2313	82.1545	76.1924	71.4518	72.4494	71.2791	76.5366
			1274.74	86.6627	78.0989	83.6675	74.6843	82.275	86.4488	85.6328	85.49	76.9966	81.0694	82.1366	86.5271	73.2209	84.3231	82.2641	76.3564	71.6397	72.6305	71.4726	76.6975
			1275.22	86.7321	78.2341	83.7444	74.8346	82.3555	86.4629	85.7012	85.5413	77.1301	81.18	82.231	86.6074	73.3784	84.4155	82.3705	76.5149	71.8239	72.8056	71.663	76.8519
			1275.7	86.7978	78.3666	83.8135	74.977	82.4355	86.4758	85.7631	85.5852	77.2586	81.2826	82.3183	86.6793	73.5303	84.5071	82.4723	76.6668	72.004	72.9738	71.8501	77.0007
			1276.18	86.8613	78.4954	83.8738	75.1116	82.5156	86.488	85.8175	85.6205	77.3813	81.3777	82.3998	86.744	73.6754	84.5959	82.5676	76.8111	72.1786	73.1337	72.0321	77.1436
			1276.66	86.9231	78.6193	83.9254	75.239	82.5961	86.5006	85.8637	85.6473	77.4977	81.4666	82.4767	86.8031	73.8124	84.6799	82.655	76.9469	72.3461	73.2844	72.2068	77.2799
			1277.15	86.9828	78.7373	83.9697	75.3607	82.6773	86.5149	85.9021	85.6676	77.6086	81.5505	82.5501	86.8588	73.9404	84.7578	82.734	77.0747	72.5053	73.4267	72.3728	77.4095
			1277.63	87.0398	78.8494	84.0094	75.4793	82.7596	86.5322	85.9341	85.6847	77.7154	81.6313	82.6214	86.9137	74.0602	84.8301	82.8058	77.1962	72.6564	73.5631	72.531	77.5335
			1278.11	87.0932	78.9565	84.0478	75.5977	82.8434	86.5528	85.9626	85.7026	77.8205	81.7107	82.6927	86.9706	74.1736	84.8983	82.8731	77.3133	72.8005	73.6971	72.6839	77.6544
			1278.59	87.1426	79.0598	84.0878	75.7185	82.929	86.5755	85.9906	85.7244	77.9258	81.7904	82.7656	87.0318	74.2829	84.9644	82.9394	77.4275	72.939	73.8311	72.8347	77.7748
			1279.08	87.188	79.1601	84.1313	75.8421	83.0152	86.5984	86.02	85.7512	78.0322	81.8708	82.8414	87.0979	74.39	85.03	83.0076	77.5387	73.0733	73.9656	72.9859	77.896
			1279.56	87.2295	79.257	84.1785	75.9663	83.0997	86.6192	86.0511	85.782	78.1385	81.9518	82.9193	87.1679	74.495	85.0952	83.0796	77.6453	73.2038	74.0985	73.1378	78.0176
			1280.04	87.2674	79.3494	84.2281	76.0869	83.179	86.6357	86.0823	85.8138	78.2423	82.0319	82.9973	87.2392	74.5969	85.159	83.1552	77.7454	73.3302	74.2253	73.2881	78.1367
			1280.52	87.302	79.4359	84.2782	76.199	83.2491	86.6469	86.1109	85.843	78.3402	82.1095	83.072	87.3082	74.6936	85.2191	83.233	77.8374	73.4519	74.3415	73.433	78.2498
			1281	87.333	79.5157	84.3268	76.2989	83.307	86.653	86.1345	85.8666	78.4292	82.183	83.1403	87.3714	74.7836	85.273	83.3104	77.9215	73.5687	74.4444	73.5686	78.3538
			1281.49	87.3608	79.5895	84.3727	76.3855	83.3516	86.6547	86.1518	85.8832	78.508	82.2519	83.2002	87.427	74.8666	85.319	83.3851	77.9996	73.6815	74.5341	73.6925	78.4479
			1281.97	87.3859	79.659	84.416	76.4609	83.3842	86.6535	86.1636	85.8933	78.5771	82.3162	83.2517	87.4747	74.9437	85.3569	83.4554	78.0749	73.7917	74.614	73.8046	78.5337
			1282.45	87.4094	79.7269	84.4577	76.5293	83.408	86.6504	86.1718	85.899	78.639	82.3772	83.2972	87.5163	75.017	85.3879	83.5206	78.1505	73.9013	74.6891	73.9075	78.6152
			1282.93	87.433	79.7951	84.4992	76.5957	83.4276	86.6463	86.1792	85.9031	78.697	82.4362	83.3404	87.5545	75.0891	85.4147	83.5808	78.2283	74.0114	74.7651	74.0054	78.6963
			1283.41	87.4584	79.8647	84.5419	76.664	83.4476	86.642	86.1881	85.9085	78.7542	82.4948	83.3855	87.5917	75.1617	85.4406	83.6367	78.3086	74.1222	74.8458	74.1026	78.78
			1283.9	87.4869	79.9354	84.5869	76.7359	83.4718	86.6385	86.2	85.9174	78.8134	82.5541	83.4355	87.63	75.2361	85.4691	83.6894	78.3906	74.2327	74.9333	74.203	78.8671
			1284.38	87.5193	80.0063	84.6344	76.8113	83.5026	86.637	86.2152	85.9314	78.8765	82.6149	83.492	87.6701	75.3126	85.5036	83.7405	78.4738	74.3415	75.0278	74.3092	78.9568
			1284.86	87.5554	80.0766	84.6842	76.889	83.5413	86.6389	86.2335	85.9514	78.9451	82.6778	83.5546	87.712	75.3918	85.5463	83.7921	78.5585	74.4477	75.129	74.4226	79.0476
			1285.34	87.5942	80.1466	84.7355	76.9683	83.5881	86.6455	86.2549	85.9774	79.0204	82.743	83.6215	87.7556	75.4743	85.5986	83.8466	78.6462	74.5512	75.2361	74.5434	79.1385
			1285.83	87.6345	80.2176	84.787	77.0491	83.6424	86.6568	86.2796	86.0091	79.103	82.8101	83.6898	87.8008	75.5611	85.6601	83.9062	78.739	74.6532	75.3488	74.6705	79.23
			1286.31	87.6747	80.2915	84.8375	77.1324	83.7026	86.6718	86.3076	86.0453	79.193	82.8783	83.7562	87.8478	75.6525	85.7287	83.9724	78.8385	74.7552	75.4665	74.8021	79.3235
			1286.79	87.7135	80.3696	84.8854	77.2195	83.7666	86.6881	86.3387	86.084	79.2889	82.9461	83.8182	87.8968	75.7478	85.8004	84.0447	78.9441	74.8583	75.5879	74.9347	79.4205
			1287.27	87.7501	80.4518	84.9294	77.3106	83.8314	86.7028	86.3714	86.122	79.3878	83.0115	83.8738	87.9479	75.8449	85.8703	84.1204	79.0532	74.9627	75.7102	75.0642	79.5211
			1287.75	87.7842	80.5361	84.9686	77.4047	83.8942	86.713	86.4032	86.1563	79.485	83.0723	83.9222	88.0004	75.9409	85.9335	84.1953	79.1613	75.0674	75.8301	75.1867	79.6236
			1288.24	87.8162	80.6196	85.003	77.4994	83.9526	86.7169	86.4308	86.1837	79.5756	83.1274	83.964	88.0535	76.0326	85.9864	84.2644	79.264	75.1712	75.9443	75.2997	79.7249
			1288.72	87.8467	80.699	85.0337	77.5919	84.0058	86.7141	86.4513	86.2027	79.6558	83.1766	84.0011	88.1063	76.118	86.0284	84.3236	79.3581	75.2732	76.0511	75.403	79.8213
			1289.2	87.8767	80.7722	85.0624	77.68	84.0547	86.7051	86.4633	86.2131	79.7238	83.2215	84.0362	88.1584	76.197	86.0616	84.3711	79.443	75.3738	76.1505	75.4994	79.9112
			1289.68	87.9071	80.839	85.091	77.7629	84.1014	86.6916	86.4672	86.2162	79.7803	83.2642	84.072	88.21	76.271	86.0905	84.4074	79.5204	75.4739	76.2443	75.5931	79.9945
			1290.16	87.9383	80.9002	85.1206	77.8404	84.1485	86.6747	86.4653	86.214	79.8281	83.3069	84.1107	88.2613	76.3417	86.1203	84.4353	79.5929	75.5748	76.3347	75.6883	80.0735
			1290.65	87.9701	80.9575	85.1509	77.9131	84.1971	86.6554	86.4603	86.2083	79.8708	83.3505	84.1527	88.3123	76.4099	86.1547	84.4581	79.6623	75.676	76.4224	75.787	80.1508
			1291.13	88.0016	81.012	85.18	77.9805	84.2466	86.6336	86.4543	86.2001	79.911	83.3943	84.1968	88.3615	76.4748	86.1947	84.478	79.7288	75.7752	76.5064	75.8877	80.2276
			1291.61	88.031	81.0634	85.2047	78.0407	84.2939	86.609	86.4479	86.1889	79.9497	83.4363	84.2399	88.4062	76.5334	86.2384	84.496	79.7906	75.8679	76.5834	75.9856	80.3032
			1292.09	88.0564	81.1107	85.2217	78.0906	84.3347	86.5809	86.4396	86.1734	79.9862	83.4737	84.278	88.4428	76.5818	86.2811	84.5109	79.8444	75.9487	76.6494	76.0741	80.3738
			1292.58	88.0756	81.1518	85.228	78.1269	84.3645	86.5488	86.4265	86.1521	80.0183	83.5036	84.307	88.4676	76.6162	86.3171	84.5203	79.8866	76.0129	76.701	76.1468	80.4345
			1293.06	88.0868	81.1847	85.2222	78.1469	84.3803	86.5127	86.4051	86.124	80.0435	83.5244	84.3236	88.478	76.6345	86.3415	84.522	79.914	76.0575	76.7368	76.1996	80.4802
			1293.54	88.0888	81.2074	85.2044	78.1491	84.3811	86.4727	86.3726	86.0889	80.0594	83.5349	84.3256	88.4731	76.6357	86.3511	84.5136	79.9241	76.082	76.7569	76.2311	80.5072
			1294.02	88.0809	81.2177	85.1754	78.1336	84.3676	86.4293	86.3274	86.0478	80.064	83.5346	84.312	88.4537	76.6198	86.3447	84.4939	79.9147	76.0875	76.7626	76.2422	80.5139
			1294.5	88.0623	81.2129	85.1366	78.101	84.3413	86.3832	86.2693	86.002	80.0551	83.5225	84.2823	88.422	76.5867	86.3233	84.4617	79.8835	76.0753	76.7538	76.2341	80.4998
			1294.99	88.0329	81.1894	85.0886	78.0513	84.3035	86.3354	86.1993	85.9526	80.0306	83.4969	84.2365	88.38	76.5348	86.2883	84.4155	79.8281	76.0454	76.7287	76.2073	80.4654
			1295.47	87.9924	81.143	85.0312	77.9841	84.2544	86.2871	86.1194	85.9	79.9879	83.4557	84.1749	88.3292	76.4615	86.2414	84.3538	79.7466	75.9965	76.6833	76.1603	80.4107
			1295.95	87.941	81.07	84.9635	77.8982	84.1933	86.2394	86.0317	85.8436	79.9244	83.3969	84.0982	88.2703	76.3639	86.1835	84.275	79.6387	75.9258	76.6132	76.0903	80.336
			1296.43	87.8797	80.9686	84.8846	77.7928	84.119	86.1927	85.9386	85.7825	79.8386	83.3198	84.008	88.2031	76.2403	86.1152	84.1779	79.5064	75.8306	76.5149	75.9945	80.2409
			1296.91	87.8105	80.8398	84.7938	77.6676	84.031	86.1465	85.8424	85.715	79.7301	83.2253	83.9065	88.1274	76.0905	86.0368	84.0628	79.3537	75.709	76.3876	75.8715	80.1261
			1297.4	87.7355	80.687	84.6904	77.5236	83.9293	86.0988	85.7451	85.6398	79.5998	83.1155	83.7961	88.0432	75.9162	85.9482	83.931	79.1853	75.5603	76.2331	75.7214	79.9924
			1297.88	87.6571	80.5152	84.5742	77.3619	83.8147	86.0467	85.648	85.5555	79.4491	82.9928	83.6782	87.9506	75.7191	85.8493	83.7845	79.0049	75.3845	76.0544	75.5454	79.8405
			1298.36	87.577	80.3286	84.4446	77.1823	83.6869	85.9866	85.5513	85.4611	79.2788	82.8582	83.5522	87.8496	75.4995	85.7394	83.6247	78.8135	75.1809	75.8535	75.3438	79.6701
			1298.84	87.4952	80.1298	84.3	76.9833	83.5448	85.9158	85.4537	85.3557	79.0885	82.7107	83.4156	87.7399	75.2559	85.6173	83.4517	78.6093	74.9475	75.6305	75.1154	79.4796
			1299.33	87.4107	79.9186	84.1392	76.7614	83.3861	85.8331	85.3528	85.2389	78.8763	82.5475	83.2639	87.6203	74.9846	85.481	83.2642	78.3882	74.6814	75.3826	74.8574	79.266
			1299.81	87.3212	79.6931	83.9605	76.5125	83.2078	85.7397	85.2453	85.1108	78.6402	82.3648	83.0928	87.4893	74.6817	85.3286	83.0596	78.1454	74.38	75.1061	74.5662	79.0265
			1300.29	87.2237	79.4507	83.7635	76.2331	83.0078	85.6387	85.1275	84.9726	78.3786	82.1597	82.899	87.3456	74.3445	85.1587	82.8353	77.877	74.042	74.7981	74.2393	78.7592
			1300.77	87.1153	79.189	83.5482	75.9217	82.7855	85.5336	84.9963	84.8262	78.0916	81.9309	82.6814	87.1882	73.9728	84.9707	82.5897	77.5808	73.6683	74.4575	73.8762	78.4642
			1301.25	86.9933	78.9062	83.315	75.5789	82.5425	85.4275	84.8492	84.674	77.78	81.6786	82.4411	87.0169	73.5679	84.7644	82.3218	77.2556	73.261	74.0856	73.4783	78.1432
			1301.74	86.8557	78.6005	83.0642	75.2064	82.2813	85.3218	84.685	84.518	77.445	81.404	82.18	86.8316	73.1316	84.54	82.0318	76.9007	72.8226	73.6839	73.0476	77.7977
			1302.22	86.7005	78.2692	82.7947	74.8055	82.0044	85.2154	84.5034	84.3594	77.0871	81.1076	81.8997	86.632	72.6639	84.2975	81.7198	76.5148	72.3532	73.253	72.5848	77.4276
			1302.7	86.5264	77.9088	82.5051	74.3763	81.7127	85.106	84.305	84.198	76.7052	80.7889	81.6003	86.4172	72.1629	84.0362	81.3859	76.0966	71.8508	72.7911	72.0887	77.0305
			1303.18	86.3331	77.5153	82.1936	73.9171	81.4059	84.9911	84.0909	84.0327	76.2976	80.446	81.2803	86.1857	71.625	83.7558	81.03	75.645	71.3119	72.2946	71.5564	76.6022
			1303.66	86.1212	77.0854	81.8597	73.4258	81.0821	84.8695	83.8631	83.8612	75.8631	80.0772	80.9374	85.9363	71.0473	83.4561	80.6524	75.1603	70.7334	71.7602	70.9854	76.1384
			1304.15	85.8931	76.618	81.5048	72.9007	80.7397	84.7418	83.6238	83.6818	75.4022	79.682	80.5702	85.6686	70.4296	83.1386	80.2541	74.6442	70.1146	71.1865	70.3753	75.637
			1304.63	85.6521	76.1147	81.132	72.3417	80.3776	84.6102	83.3752	83.4926	74.917	79.2618	80.1783	85.3834	69.7743	82.8053	79.8372	74.0991	69.4573	70.5748	69.7282	75.0988
			1305.11	85.4021	75.5787	80.7447	71.7494	79.9954	84.4776	83.1191	83.2926	74.4103	78.819	79.7626	85.0825	69.0853	82.4582	79.4039	73.5267	68.765	69.9283	69.0478	74.5268
			1305.59	85.1464	75.0131	80.3454	71.1245	79.5931	84.3461	82.8563	83.081	73.8839	78.3561	79.3245	84.7674	68.3656	82.0979	78.9555	72.9262	68.04	69.2498	68.3371	73.9248
			1306.08	84.8866	74.42	79.9339	70.4667	79.1704	84.2162	82.5865	82.8576	73.3368	77.8745	78.8645	84.4392	67.6149	81.7231	78.4917	72.2955	67.2818	68.5397	67.5961	73.2949
			1306.56	84.6228	73.7994	79.5084	69.7749	78.7265	84.0869	82.309	82.6225	72.766	77.3738	78.3829	84.0981	66.8298	81.331	78.0111	71.6318	66.4871	67.7956	66.8217	72.6369
			1307.04	84.3537	73.1512	79.066	69.0483	78.2604	83.9566	82.0232	82.3765	72.1675	76.8528	77.8797	83.7437	66.0059	80.9185	77.5124	70.9344	65.652	67.0145	66.009	71.9495
			1307.52	84.0783	72.4768	78.6055	68.2886	77.7724	83.8235	81.7297	82.1215	71.5393	76.3112	77.3563	83.3763	65.1415	80.4848	76.9959	70.2067	64.7751	66.1951	65.155	71.2324
			1308	83.7964	71.7805	78.1286	67.5008	77.2649	83.6868	81.43	81.8603	70.883	75.7508	76.8163	82.9973	64.2398	80.0318	76.4644	69.4557	63.8602	65.3409	64.2608	70.4883
			1308.48	83.5091	71.0697	77.6403	66.6932	76.742	83.5465	81.1265	81.5961	70.2046	75.1757	76.265	82.6097	63.3098	79.5651	75.9233	68.6908	62.916	64.4602	63.3325	69.7238
			1308.97	83.2187	70.3531	77.1478	65.8752	76.2092	83.403	80.8213	81.3317	69.5118	74.5913	75.709	82.2171	62.3636	79.0918	75.3793	67.9212	61.954	63.5636	62.3796	68.9474
			1309.45	82.9283	69.6384	76.6592	65.056	75.6718	83.2568	80.5158	81.0694	68.8125	74.0028	75.1542	81.8234	61.4138	78.6196	74.8388	67.156	60.9854	62.6619	61.4126	68.1683
			1309.93	82.6414	68.933	76.1826	64.2443	75.1357	83.1086	80.2113	80.8109	68.1136	73.4157	74.6067	81.4326	60.4721	78.1556	74.3083	66.4062	60.0203	61.7646	60.4426	67.3954
			1310.41	82.363	68.2458	75.728	63.4517	74.6088	82.9598	79.9114	80.5595	67.4228	72.8378	74.0747	81.0506	59.5517	77.7085	73.796	65.69	59.071	60.8829	59.4835	66.6401
			1310.9	82.1009	67.5922	75.3094	62.6982	74.1044	82.8145	79.624	80.3215	66.7533	72.2832	73.5722	80.6876	58.6738	77.2911	73.3154	65.0376	58.1589	60.0351	58.5586	65.9206
			1311.38	81.8674	66.9992	74.9483	62.0174	73.6452	82.6802	79.3641	80.1084	66.1288	71.7763	73.1227	80.3608	57.8739	76.9235	72.8879	64.4934	57.3205	59.2539	57.706	65.2677
			1311.86	81.6799	66.5071	74.6728	61.4578	73.2635	82.5679	79.1534	79.9371	65.5868	71.3532	72.7598	80.0946	57.2043	76.6337	72.5436	64.1117	56.6112	58.5891	56.9816	64.7261
			1312.34	81.5588	66.1651	74.5152	61.0775	72.9988	82.4911	79.0181	79.8274	65.1754	71.0574	72.5234	79.9183	56.7296	76.4544	72.3174	63.9455	56.0995	58.1034	56.4537	64.3513
			1312.83	81.5238	66.0212	74.5035	60.9316	72.8891	82.4618	78.982	79.7981	64.945	70.9312	72.4512	79.8599	56.5136	76.4155	72.2416	64.032	55.8528	57.8601	56.1897	64.1971
			1313.31	81.5885	66.109	74.654	61.0574	72.9611	82.4882	79.0603	79.8611	64.9352	71.004	72.5674	79.9381	56.6021	76.5355	72.3364	64.3811	55.9194	57.906	56.238	64.3019
			1313.79	81.7559	66.4365	74.9652	61.4619	73.2222	82.5711	79.2543	80.0183	65.1636	71.2836	72.8754	80.1563	57.0088	76.8149	72.6038	64.9717	56.3138	58.2576	56.6143	64.6757
			1314.27	82.0179	66.9839	75.4175	62.1196	73.6577	82.7046	79.5506	80.2605	65.6209	71.7529	73.3556	80.5009	57.7109	77.2354	73.0266	65.7563	57.0119	58.8951	57.2965	65.2965
			1314.75	82.3556	67.7074	75.9772	62.9777	74.2338	82.8774	79.9243	80.5692	66.2733	72.3744	73.9695	80.9443	58.6539	77.7637	73.5725	66.6696	57.9571	59.7679	58.2299	66.1144
			1315.23	82.7432	68.5476	76.6022	63.966	74.9037	83.0754	80.344	80.92	67.0684	73.0968	74.6664	81.4495	59.7621	78.3577	74.1993	67.638	59.0715	60.8037	59.3377	67.0611
			1315.72	83.1505	69.4382	77.2472	65.0067	75.6142	83.2837	80.776	81.2853	67.9435	73.8625	75.391	81.9754	60.9488	78.972	74.861	68.5867	60.2671	61.9193	60.5318	68.0596
			1316.2	83.5465	70.3124	77.8671	66.0222	76.3106	83.4875	81.1882	81.6372	68.8314	74.6134	76.0886	82.4815	62.1254	79.5627	75.5108	69.447	61.4549	63.0294	61.7211	69.0326
			1316.68	83.902	71.1087	78.4199	66.9417	76.9416	83.6731	81.5527	81.9494	69.6665	75.295	76.71	82.9312	63.2079	80.0898	76.1044	70.1613	62.551	64.0536	62.8188	69.9093
			1317.16	84.1934	71.7758	78.8698	67.7068	77.4641	83.8284	81.848	82.2002	70.3903	75.8618	77.2162	83.2956	64.1241	80.5206	76.6034	70.6893	63.4829	64.9228	63.7495	70.6325
			1317.65	84.4049	72.2769	79.1905	68.2767	77.8472	83.9436	82.0608	82.3745	70.9571	76.2805	77.5815	83.5561	64.8195	80.832	76.9789	71.0114	64.1954	65.5853	64.4562	71.1629
			1318.13	84.5308	72.5931	79.3679	68.6313	78.076	84.0126	82.1867	82.4667	71.3384	76.534	77.7957	83.7056	65.2631	81.0124	77.2145	71.1291	64.6556	66.0113	64.906	71.4824
			1318.61	84.5748	72.7237	79.4024	68.7716	78.1519	84.0341	82.2296	82.4807	71.5257	76.6223	77.8637	83.7484	65.4496	81.0628	77.3087	71.0624	64.8556	66.1957	65.0937	71.5942
			1319.09	84.548	72.684	79.3075	68.7166	78.0914	84.0116	82.1998	82.4289	71.5297	76.561	77.8025	83.6973	65.3976	80.9956	77.2735	70.8436	64.8123	66.1557	65.0397	71.519
			1319.57	84.4649	72.501	79.1064	68.4971	77.92	83.9529	82.1109	82.3288	71.3756	76.3765	77.6353	83.5704	65.1435	80.8317	77.1313	70.5086	64.5614	65.9259	64.784	71.2892
			1320.06	84.3396	72.2061	78.8268	68.148	77.6669	83.8687	81.9766	82.1983	71.0962	76.0998	77.3866	83.3863	64.732	80.5958	76.9086	70.0902	64.1491	65.5488	64.3749	70.9405
			1320.54	84.183	71.8289	78.4942	67.7018	77.3575	83.7693	81.8083	82.0517	70.725	75.7593	77.077	83.1609	64.2064	80.3116	76.63	69.6127	63.6214	65.0659	63.8587	70.5062
			1321.02	84.0016	71.3929	78.1284	67.1837	77.0102	83.6636	81.6144	81.8979	70.2895	75.3768	76.7208	82.9055	63.6013	79.9974	76.3144	69.0913	63.0161	64.5104	63.2709	70.0115
			1321.5	83.7989	70.9142	77.742	66.6114	76.6349	83.5571	81.4004	81.7399	69.8094	74.9652	76.3271	82.6267	62.9396	79.6647	75.9733	68.5342	62.3587	63.9046	62.6338	69.4735
			1321.98	83.5768	70.4025	77.3417	65.9967	76.2355	83.4525	81.17	81.5769	69.297	74.5308	75.9014	82.3281	62.2348	79.319	75.6123	67.9468	61.6635	63.2608	61.9578	68.9026
			1322.47	83.3376	69.8641	76.9313	65.3485	75.8132	83.35	80.9263	81.4066	68.7602	74.0759	75.4487	82.0121	61.4949	78.9621	75.2343	67.3346	60.9372	62.5857	61.247	68.3053
			1322.95	83.0856	69.3045	76.5144	64.676	75.3692	83.2484	80.6732	81.2269	68.2051	73.6022	74.9758	81.6816	60.7267	78.5941	74.8422	66.7057	60.1842	61.8845	60.5043	67.6876
			1323.43	82.8263	68.7305	76.0959	63.9895	74.9077	83.1464	80.4148	81.0374	67.6381	73.1127	74.4916	81.3412	59.9389	78.2163	74.4402	66.0699	59.41	61.1638	59.735	67.0565
			1323.91	82.5663	68.1496	75.6818	63.2994	74.4354	83.0426	80.1553	80.8391	67.0661	72.6127	74.006	80.9967	59.1421	77.8314	74.0343	65.4366	58.6223	60.4321	58.9479	66.4193
			1324.4	82.3112	67.5694	75.2776	62.6146	73.9607	82.9365	79.8981	80.6341	66.4955	72.108	73.5279	80.6539	58.3467	77.4436	73.6305	64.8125	57.8295	59.6983	58.1532	65.7829
			1324.88	82.0645	66.9954	74.8866	61.9401	73.4912	82.8281	79.6452	80.4246	65.9303	71.604	73.063	80.3176	57.5607	77.0574	73.2335	64.2006	57.0388	58.9691	57.3599	65.1513
			1325.36	81.8278	66.431	74.5094	61.2777	73.0328	82.7184	79.3978	80.213	65.3723	71.1044	72.6133	79.9909	56.7887	76.6766	72.8462	63.601	56.2547	58.2481	56.5744	64.526
			1325.84	81.6006	65.8783	74.1454	60.6272	72.5885	82.6093	79.1568	80.0016	64.822	70.6123	72.1788	79.6751	56.0335	76.3046	72.4703	63.014	55.4802	57.5369	55.8003	63.9069
			1326.32	81.3826	65.3399	73.7943	59.9901	72.1603	82.5035	78.9247	79.7937	64.2805	70.1307	71.7592	79.3711	55.2985	75.9444	72.1082	62.4424	54.7186	56.8374	55.0411	63.2952
			1326.81	81.1738	64.8201	73.4583	59.3716	71.7502	82.404	78.7049	79.5934	63.7515	69.6643	71.3562	79.0799	54.5905	75.5998	71.7639	61.8918	53.9768	56.1544	54.3023	62.6951
			1327.29	80.9753	64.3246	73.1423	58.7802	71.3606	82.3133	78.5018	79.4059	63.2412	69.2191	70.9738	78.8034	53.9195	75.2748	71.4429	61.3691	53.2647	55.4961	53.592	62.1144
			1327.77	80.7882	63.8593	72.8527	58.2259	70.9942	82.2325	78.3186	79.2356	62.7568	68.8007	70.6168	78.5432	53.2963	74.9734	71.1512	60.8798	52.5934	54.8725	52.9186	61.562
			1328.25	80.6133	63.4273	72.5945	57.7157	70.6526	82.1607	78.1561	79.0848	62.3037	68.4122	70.2888	78.3001	52.7281	74.6977	70.8924	60.4251	51.9714	54.2913	52.288	61.0458
			1328.73	80.4502	63.0274	72.37	57.2512	70.336	82.0955	78.012	78.9529	61.8834	68.0522	69.9904	78.0735	52.2157	74.448	70.6666	60.0023	51.4013	53.7549	51.7004	60.569
			1329.22	80.2982	62.6558	72.1776	56.8287	70.0427	82.0336	77.8818	78.8362	61.4939	67.7158	69.7193	77.8619	51.7537	74.2223	70.4707	59.6069	50.8792	53.2607	51.1515	60.1304
			1329.7	80.1569	62.3078	72.014	56.4421	69.7713	81.9728	77.7612	78.7296	61.1316	67.397	69.4723	77.6637	51.3343	74.0183	70.3004	59.236	50.3982	52.8029	50.6352	59.7266
			1330.18	80.0275	61.9819	71.876	56.0869	69.522	81.9127	77.6482	78.629	60.7946	67.0924	69.2479	77.4794	50.9519	73.8356	70.153	58.8917	49.953	52.3772	50.1484	59.355
			1330.66	79.9131	61.6816	71.7624	55.7634	69.2974	81.8558	77.5442	78.5324	60.4847	66.8034	69.0478	77.3117	50.6069	73.6756	70.0293	58.5806	49.5434	51.984	49.694	59.0166
			1331.14	79.8176	61.4142	71.6744	55.4764	69.1021	81.8063	77.4532	78.4412	60.2069	66.5365	68.8768	77.1649	50.306	73.542	69.9332	58.3115	49.1756	51.6287	49.2809	58.7157
			1331.63	79.7443	61.1886	71.6142	55.2327	68.9406	81.7691	77.3803	78.359	59.9676	66.3007	68.7404	77.0439	50.0584	73.4384	69.8696	58.0921	48.8592	51.3197	48.9201	58.4582
			1332.11	79.6941	61.0109	71.5835	55.0376	68.8151	81.7476	77.3287	78.2902	59.7712	66.1047	68.6426	76.9519	49.8719	73.367	69.8423	57.9261	48.6029	51.0637	48.6202	58.2482
			1332.59	79.6659	60.8835	71.5824	54.8931	68.7249	81.7433	77.2994	78.2391	59.6184	65.9535	68.5841	76.8895	49.7497	73.3273	69.8522	57.8142	48.4116	50.8642	48.384	58.0868
			1333.07	79.6571	60.8055	71.6107	54.7987	68.6681	81.7553	77.2911	78.2089	59.5077	65.849	68.5639	76.8561	49.6911	73.3177	69.8984	57.7565	48.2861	50.7208	48.2103	57.973
			1333.56	79.6664	60.7764	71.6691	54.755	68.6439	81.7819	77.3025	78.2023	59.4379	65.7921	68.581	76.8505	49.6951	73.3377	69.98	57.756	48.2266	50.6333	48.0976	57.907
			1334.04	79.695	60.7992	71.7616	54.7667	68.6555	81.8212	77.3338	78.2219	59.4117	65.7848	68.6373	76.8736	49.7647	73.3897	70.0982	57.8202	48.2358	50.6055	48.0493	57.8934
			1334.52	79.7467	60.8819	71.8951	54.844	68.7105	81.8724	77.3878	78.2707	59.4367	65.8325	68.7381	76.9282	49.9081	73.4796	70.2575	57.9597	48.3214	50.6466	48.0761	57.9424
			1335	79.8267	61.0348	72.0783	55	68.8191	81.9358	77.4689	78.3517	59.5244	65.9431	68.8904	77.0183	50.1375	73.6156	70.4644	58.1846	48.4946	50.7704	48.1946	58.0677
			1335.48	79.9396	61.2675	72.318	55.2465	68.9915	82.0124	77.5816	78.4671	59.6863	66.1241	69.1005	77.1478	50.4644	73.8053	70.7248	58.5013	48.7664	50.9911	48.422	58.2827
			1335.97	80.0873	61.5851	72.6175	55.59	69.2343	82.1039	77.7282	78.6178	59.9309	66.381	69.3714	77.3189	50.896	74.0533	71.0426	58.912	49.1445	51.3192	48.7711	58.5962
			1336.45	80.2693	61.9886	72.9757	56.0314	69.5512	82.2123	77.9095	78.8035	60.2632	66.7163	69.7032	77.5332	51.434	74.3611	71.4195	59.4181	49.6327	51.7603	49.2488	59.0123
			1336.93	80.4849	62.4778	73.3901	56.5702	69.9441	82.3408	78.1262	79.0249	60.687	67.1323	70.0962	77.7938	52.0788	74.7287	71.8573	60.025	50.2352	52.3181	49.8583	59.5329
			1337.41	80.7363	63.0578	73.8602	57.2106	70.4176	82.494	78.3815	79.2842	61.2097	67.6344	70.5551	78.1078	52.8354	75.1583	72.361	60.7457	50.9614	52.9991	50.6059	60.1636
			1337.89	81.0307	63.742	74.3898	57.9659	70.9805	82.6779	78.6839	79.5864	61.8445	68.2334	71.0916	78.4875	53.7172	75.6551	72.9398	61.5973	51.8297	53.8162	51.5047	60.9163
			1338.38	81.3789	64.549	74.9858	58.8552	71.6426	82.8972	79.045	79.9367	62.6069	68.9418	71.7214	78.9469	54.7424	76.2263	73.6033	62.5894	52.8624	54.7851	52.5713	61.8065
			1338.86	81.7893	65.4905	75.6513	59.8915	72.4064	83.1522	79.4739	80.3356	63.5045	69.7642	72.4546	79.4932	55.9212	76.8738	74.3534	63.7096	54.0708	55.9119	53.8127	62.8408
			1339.34	82.2603	66.5564	76.3775	61.0651	73.2567	83.4351	79.9691	80.7744	64.5229	70.6863	73.2839	80.118	57.2391	77.5862	75.174	64.9161	55.4378	57.1783	55.209	64.0031
			1339.82	82.7753	67.7062	77.14	62.3346	74.1572	83.7302	80.513	81.2339	65.6207	71.6702	74.1781	80.7927	58.6496	78.336	76.0297	66.147	56.9095	58.5354	56.7057	65.2471
			1340.31	83.3059	68.8789	77.9045	63.6358	75.0602	84.019	81.0757	81.6899	66.7394	72.664	75.0899	81.4772	60.0847	79.0865	76.8745	67.3432	58.4089	59.9154	58.2262	66.5079
			1340.79	83.8228	70.0145	78.6394	64.906	75.9237	84.2868	81.6253	82.1223	67.8251	73.6211	75.9734	82.134	61.4812	79.8047	77.6693	68.4677	59.8641	61.2566	59.6995	67.7249
			1341.27	84.3056	71.0749	79.326	66.1046	76.7254	84.5275	82.1398	82.5212	68.8467	74.5149	76.7999	82.7412	62.8011	80.472	78.394	69.5111	61.2322	62.5234	61.0833	68.8615
			1341.75	84.7469	72.0496	79.9611	67.2198	77.4638	84.7432	82.6103	82.8872	69.7992	75.3419	77.5621	83.2948	64.0372	81.0858	79.0481	70.4834	62.5049	63.7103	62.3691	69.9098
			1342.23	85.1494	72.9486	80.5514	68.2611	78.1507	84.9402	83.0393	83.227	70.6953	76.1135	78.2685	83.8032	65.2032	81.6539	79.6438	71.4015	63.6973	64.8319	63.572	70.8816
			1342.72	85.5204	73.7892	81.1073	69.2456	78.8014	85.1252	83.4347	83.548	71.5528	76.8457	78.9328	84.2785	66.319	82.187	80.1962	72.2784	64.8323	65.9083	64.7145	71.7958
			1343.2	85.867	74.5862	81.6364	70.1867	79.4264	85.3027	83.8041	83.8554	72.3847	77.55	79.566	84.7299	67.3986	82.6926	80.7164	73.1172	65.9266	66.9531	65.8133	72.6669
			1343.68	86.1927	75.3448	82.1407	71.0873	80.0274	85.4733	84.1522	84.1498	73.1933	78.2288	80.1713	85.16	68.4435	83.1726	81.2078	73.9104	66.9842	67.9678	66.8722	73.499
			1344.16	86.497	76.0601	82.6174	71.9399	80.5977	85.6349	84.4789	84.4283	73.9704	78.8761	80.7436	85.5651	69.443	83.6228	81.6669	74.6443	67.9952	68.9416	67.8817	74.2859
			1344.64	86.7766	76.7209	83.0599	72.7308	81.1261	85.7839	84.7811	84.6862	74.7013	79.4803	81.2731	85.9375	70.3791	84.0362	82.0864	75.3049	68.9419	69.8566	68.824	75.0148
			1345.13	87.0274	77.315	83.4621	73.4465	81.602	85.9172	85.0542	84.9195	75.3714	80.0298	81.7496	86.2703	71.2347	84.4055	82.4588	75.8834	69.8058	70.6954	69.6812	75.6724
			1345.61	87.2469	77.8348	83.8198	74.0796	82.0194	86.0336	85.2945	85.1259	75.9712	80.5173	82.1671	86.5597	71.9989	84.7263	82.7802	76.3784	70.5747	71.4468	70.4421	76.2505
			1346.09	87.434	78.2792	84.1317	74.6301	82.3784	86.1336	85.5004	85.3047	76.4981	80.9405	82.5253	86.8068	72.6696	84.9977	83.0508	76.794	71.2455	72.1076	71.1046	76.7477
			1346.57	87.5897	78.653	84.3984	75.1037	82.6839	86.219	85.6724	85.4564	76.9551	81.3016	82.828	87.016	73.2513	85.2213	83.2739	77.1374	71.8217	72.6809	71.6736	77.1683
			1347.06	87.7152	78.9634	84.6213	75.508	82.9427	86.2912	85.812	85.5812	77.3473	81.6046	83.0812	87.1925	73.751	85.4005	83.4541	77.4161	72.3104	73.1715	72.1572	77.5194
			1347.54	87.812	79.2177	84.8018	75.8494	83.1608	86.3513	85.9215	85.6789	77.6797	81.8532	83.2901	87.3404	74.1751	85.539	83.5954	77.6369	72.7192	73.5839	72.5628	77.8083
			1348.02	87.8818	79.4221	84.9419	76.132	83.343	86.3996	86.0035	85.7495	77.9565	82.0515	83.4589	87.4622	74.5288	85.6413	83.7013	77.8067	73.0547	73.9217	72.8959	78.0414
			1348.5	87.9272	79.5819	85.0457	76.3597	83.4925	86.4365	86.0612	85.7951	78.1823	82.2047	83.5908	87.5587	74.8179	85.7136	83.7753	77.9341	73.3241	74.1899	73.1616	78.2252
			1348.98	87.9526	79.7031	85.1197	76.5376	83.6132	86.4636	86.0988	85.8199	78.3637	82.3207	83.6902	87.6315	75.0505	85.7633	83.8226	78.0294	73.5365	74.3971	73.3666	78.3675
			1349.47	87.964	79.7931	85.1727	76.6737	83.7092	86.483	86.1216	85.8309	78.5097	82.41	83.763	87.6831	75.2378	85.7991	83.8499	78.1041	73.7036	74.5562	73.5211	78.4773
			1349.95	87.9682	79.8607	85.214	76.7783	83.7858	86.4974	86.1349	85.8355	78.6306	82.4843	83.8162	87.7179	75.3928	85.8291	83.8645	78.1684	73.838	74.6828	73.6382	78.5646
			1350.43	87.971	79.9147	85.2511	76.8619	83.8481	86.5089	86.1436	85.8402	78.7354	82.5534	83.8572	87.741	75.5272	85.859	83.8735	78.2294	73.9515	74.7914	73.7319	78.6378
			1350.91	87.9757	79.9621	85.2882	76.9327	83.9002	86.5183	86.151	85.8489	78.83	82.6232	83.8915	87.7571	75.6495	85.8911	83.8819	78.2902	74.0521	74.8923	73.8139	78.7028
			1351.39	87.9829	80.0074	85.3259	76.9959	83.945	86.5248	86.1584	85.8621	78.9164	82.6948	83.9224	87.7699	75.7633	85.924	83.8919	78.3508	74.1444	74.9899	73.8925	78.7623
			1351.88	87.9912	80.053	85.3623	77.0536	83.9844	86.5273	86.1659	85.8781	78.994	82.7656	83.9512	87.7816	75.8691	85.955	83.9039	78.41	74.2301	75.084	73.9718	78.8169
			1352.36	87.9984	80.1	85.3948	77.1074	84.0203	86.5248	86.173	85.8944	79.0617	82.8315	83.9783	87.7937	75.9662	85.9812	83.9172	78.4674	74.3107	75.1721	74.0535	78.8671
			1352.84	88.0035	80.1499	85.4221	77.1596	84.0547	86.5175	86.1794	85.9089	79.1201	82.89	84.005	87.8081	76.0552	86.0014	83.9319	78.5248	74.389	75.2528	74.1385	78.9152
			1353.32	88.0075	80.2045	85.4446	77.2146	84.0902	86.5071	86.186	85.921	79.1722	82.9413	84.0339	87.8273	76.1389	86.0168	83.9492	78.5858	74.47	75.3273	74.2282	78.9655
			1353.81	88.0133	80.2665	85.4648	77.2777	84.1291	86.4957	86.194	85.931	79.2233	82.9884	84.0689	87.8541	76.2214	86.0306	83.9712	78.6547	74.5594	75.3997	74.3242	79.0239
			1354.29	88.0252	80.3374	85.4855	77.3541	84.1723	86.485	86.205	85.9394	79.279	83.036	84.1133	87.891	76.3067	86.0465	84.0006	78.7346	74.6613	75.4754	74.4281	79.0957
			1354.77	88.0465	80.4173	85.5095	77.4459	84.219	86.4754	86.22	85.9465	79.3431	83.0888	84.1689	87.939	76.3967	86.0679	84.0396	78.826	74.7766	75.5586	74.5399	79.1837
			1355.25	88.0785	80.5039	85.5384	77.5514	84.2672	86.4658	86.2389	85.9521	79.4171	83.1494	84.2344	87.997	76.491	86.0969	84.089	78.9271	74.9022	75.6517	74.6583	79.2868
			1355.73	88.12	80.594	85.5729	77.6658	84.3144	86.4541	86.2604	85.9559	79.4999	83.2184	84.3066	88.0619	76.5876	86.1341	84.1489	79.0353	75.0332	75.7544	74.7811	79.4009
			1356.22	88.1678	80.685	85.6134	77.7835	84.36	86.4389	86.2832	85.958	79.5898	83.2948	84.3812	88.1304	76.6851	86.1799	84.2187	79.1479	75.1651	75.8658	74.9072	79.5208
			1356.7	88.2181	80.7761	85.6606	77.9005	84.4053	86.4201	86.3063	85.9598	79.6856	83.3774	84.4556	88.1994	76.7841	86.2345	84.298	79.2639	75.2964	75.9852	75.0368	79.6421
			1357.18	88.2677	80.8688	85.7154	78.0151	84.4533	86.3996	86.3294	85.9632	79.7869	83.4654	84.5293	88.2675	76.8874	86.2987	84.3863	79.3832	75.4286	76.1134	75.172	79.763
			1357.66	88.3143	80.9655	85.7786	78.1282	84.5076	86.3801	86.353	85.9699	79.8938	83.5586	84.6038	88.3342	76.9984	86.373	84.4825	79.506	75.5647	76.2514	75.3153	79.8832
			1358.14	88.3567	81.0685	85.85	78.2413	84.5706	86.3641	86.3776	85.9805	80.0055	83.6568	84.6817	88.3998	77.1196	86.4572	84.5844	79.632	75.7074	76.3995	75.4681	80.0038
			1358.63	88.3945	81.1784	85.9277	78.3554	84.6428	86.3525	86.4029	85.9939	80.1202	83.7594	84.7655	88.4645	77.251	86.5497	84.6884	79.7607	75.8572	76.5565	75.6298	80.126
			1359.11	88.4274	81.2944	86.009	78.4708	84.7231	86.3443	86.428	86.0075	80.2349	83.8656	84.8562	88.5282	77.391	86.6479	84.7912	79.8921	76.0131	76.7199	75.7991	80.2508
			1359.59	88.456	81.415	86.0911	78.5874	84.8098	86.3371	86.4515	86.0188	80.3481	83.975	84.9539	88.5911	77.5379	86.7497	84.8906	80.0284	76.1741	76.8879	75.9751	80.3806
			1360.07	88.4821	81.5404	86.173	78.7072	84.903	86.328	86.4726	86.0263	80.4614	84.089	85.0588	88.6545	77.6925	86.8544	84.9879	80.1749	76.342	77.0609	76.1607	80.5195
			1360.56	88.5097	81.674	86.2565	78.8354	85.0053	86.3157	86.4918	86.0312	80.5818	84.2116	85.1719	88.7216	77.8606	86.9645	85.0888	80.3404	76.5241	77.2442	76.3639	80.6748
			1361.04	88.5451	81.823	86.3463	78.9814	85.1222	86.3009	86.5123	86.0372	80.7204	84.3487	85.2963	88.7982	78.0521	87.0844	85.2026	80.5347	76.7323	77.4473	76.5969	80.8565
			1361.52	88.5965	81.9966	86.4487	79.1563	85.2603	86.2865	86.5396	86.0499	80.8901	84.5065	85.4358	88.8911	78.2779	87.2194	85.339	80.7639	76.9806	77.6806	76.8723	81.0737
			1362	88.6717	82.2018	86.5683	79.3689	85.4228	86.2764	86.5805	86.0737	81.0987	84.6866	85.5935	89.0059	78.5434	87.3714	85.5036	81.0256	77.2766	77.9502	77.1954	81.3298
			1362.48	88.7736	82.4375	86.705	79.6188	85.6062	86.2728	86.6397	86.109	81.3427	84.8836	85.7682	89.1434	78.8422	87.5366	85.6928	81.3073	77.6153	78.2511	77.5571	81.6178
			1362.97	88.8983	82.6928	86.8523	79.8944	85.7994	86.274	86.7169	86.1508	81.6058	85.0847	85.9532	89.2973	79.1551	87.7048	85.8928	81.5911	77.9767	78.5669	77.9341	81.9193
			1363.45	89.0355	82.9505	87.0008	80.1767	85.988	86.2752	86.8064	86.191	81.8654	85.2752	86.139	89.4569	79.4583	87.864	86.0864	81.8622	78.3338	78.8766	78.2976	82.213
			1363.93	89.1736	83.1958	87.1425	80.4487	86.1616	86.2708	86.8993	86.2225	82.1038	85.4456	86.3174	89.6113	79.735	88.0062	86.2608	82.1142	78.6657	79.1649	78.627	82.4831
			1364.41	89.304	83.4215	87.274	80.7014	86.3167	86.2571	86.9875	86.2427	82.3145	85.5945	86.4845	89.7541	79.9809	88.1303	86.413	82.3487	78.965	79.4278	78.9173	82.7255
			1364.89	89.4234	83.6289	87.3972	80.9353	86.4564	86.2341	87.066	86.2538	82.5021	85.7278	86.6412	89.8838	80.2034	88.2406	86.548	82.572	79.2369	79.6716	79.1767	82.9453
			1365.38	89.5324	83.8244	87.5161	81.1565	86.5866	86.2041	87.1329	86.2604	82.6769	85.8542	86.7911	90.0023	80.4152	88.3443	86.6753	82.7914	79.4932	79.9075	79.42	83.1523
			1365.86	89.6337	84.0161	87.6354	81.3731	86.7131	86.1712	87.1887	86.268	82.85	85.9822	86.9387	90.1135	80.6291	88.4481	86.8044	83.0134	79.7468	80.1466	79.6626	83.3566
			1366.34	89.7307	84.2113	87.7583	81.5928	86.8402	86.1395	87.2357	86.2807	83.0304	86.1184	87.0882	90.2218	80.855	88.5572	86.9423	83.2424	80.0077	80.3967	79.9172	83.5661
			1366.82	89.8264	84.4152	87.8865	81.8211	86.9702	86.1124	87.2769	86.301	83.2232	86.2669	87.243	90.3313	81.0989	88.6748	87.0924	83.4814	80.2826	80.662	80.1918	83.786
			1367.31	89.9231	84.6308	88.0203	82.0616	87.1041	86.0917	87.316	86.3291	83.4303	86.4289	87.4054	90.446	81.3626	88.8018	87.2552	83.7319	80.5743	80.9428	80.4902	84.0189
			1367.79	90.0224	84.8582	88.159	82.3156	87.2422	86.0779	87.3569	86.3635	83.6503	86.6034	87.5767	90.5691	81.6447	88.938	87.4284	83.9932	80.883	81.2364	80.8114	84.2652
			1368.27	90.1244	85.095	88.3012	82.5814	87.3851	86.0699	87.4019	86.4015	83.8798	86.7874	87.7563	90.7018	81.9411	89.0814	87.6082	84.2621	81.2061	81.5387	81.1506	84.5228
			1368.75	90.2281	85.3359	88.4448	82.8543	87.5325	86.0656	87.4519	86.4404	84.1138	86.9757	87.9411	90.8424	82.2452	89.2294	87.7906	84.532	81.5387	81.8442	81.4993	84.7874
			1369.23	90.3305	85.5736	88.5867	83.1265	87.6828	86.0627	87.5047	86.4783	84.3461	87.1623	88.1251	90.9858	82.5488	89.3781	87.9717	84.7939	81.8729	82.1465	81.8464	85.0517
			1369.71	90.4273	85.7998	88.723	83.3881	87.8326	86.0589	87.5566	86.5134	84.5698	87.3405	88.3007	91.1246	82.8423	89.5232	88.1482	85.0384	82.1988	82.4382	82.1802	85.3068
			1370.2	90.5141	86.0076	88.8497	83.6298	87.9773	86.0526	87.6026	86.5443	84.7784	87.5047	88.4599	91.2513	83.1171	89.6605	88.3171	85.2588	82.5062	82.7123	82.4905	85.5439
			1370.68	90.5875	86.1927	88.9634	83.8454	88.1128	86.0422	87.6391	86.5695	84.9673	87.6514	88.5966	91.3609	83.3675	89.7869	88.4767	85.4526	82.7879	82.9636	82.7712	85.7574
			1371.16	90.6459	86.3555	89.0633	84.0336	88.2368	86.0269	87.664	86.5875	85.135	87.7802	88.7086	91.4523	83.5922	89.9013	88.6269	85.623	83.0411	83.1903	83.0218	85.9462
			1371.64	90.6905	86.5005	89.1512	84.1991	88.3504	86.0068	87.6776	86.5974	85.284	87.894	88.798	91.5292	83.7954	90.005	88.7697	85.7778	83.2696	83.3952	83.2478	86.1147
			1372.13	90.7253	86.6357	89.2313	84.351	88.4573	85.9835	87.6822	86.599	85.4208	87.998	88.8711	91.5987	83.9854	90.1009	88.9087	85.9265	83.482	83.5851	83.459	86.2722
			1372.61	90.7563	86.7696	89.3091	84.5002	88.5623	85.9599	87.6813	86.5934	85.5531	88.0976	88.9366	91.6696	84.1715	90.1927	89.0478	86.0763	83.6889	83.7682	83.6656	86.4294
			1373.09	90.7902	86.9073	89.3889	84.6547	88.6686	85.9402	87.6785	86.5827	85.6873	88.1958	89.0034	91.7487	84.3592	90.2822	89.188	86.2272	83.8973	83.9502	83.8742	86.5944
			1373.57	90.8319	87.0469	89.4708	84.8144	88.7737	85.9276	87.6761	86.5695	85.8237	88.2904	89.0769	91.8366	84.5447	90.3681	89.3254	86.3701	84.1048	84.1293	84.0814	86.7671
			1374.05	90.8822	87.1776	89.5496	84.969	88.869	85.9225	87.6744	86.5553	85.9547	88.3736	89.1559	91.9263	84.7135	90.4451	89.4499	86.4902	84.2975	84.2948	84.2731	86.9368
			1374.54	90.9369	87.2841	89.6159	85.1007	88.9423	85.9211	87.6711	86.5402	86.0669	88.4353	89.233	92.0048	84.8456	90.506	89.5491	86.5743	84.4544	84.4303	84.4296	87.0856
			1375.02	90.9884	87.354	89.6609	85.1934	88.9835	85.9164	87.6633	86.5227	86.1477	88.4684	89.298	92.0597	84.9255	90.546	89.6144	86.6168	84.5583	84.5224	84.5357	87.1972
			1375.5	91.0295	87.3839	89.6803	85.24	88.9895	85.9021	87.6486	86.5006	86.1911	88.4726	89.3424	92.0854	84.9492	90.5641	89.6445	86.6199	84.604	84.5662	84.5878	87.2639
			1375.98	91.0552	87.3779	89.6741	85.2417	88.9638	85.8751	87.626	86.4726	86.1982	88.4527	89.362	92.0835	84.9225	90.5624	89.6446	86.5881	84.5966	84.5651	84.5916	87.2873
			1376.46	91.063	87.343	89.6446	85.2036	88.9116	85.8363	87.5956	86.4379	86.1728	88.4138	89.3549	92.0593	84.8544	90.543	89.6212	86.5232	84.5452	84.5248	84.555	87.2722
			1376.95	91.0511	87.283	89.5926	85.1281	88.8369	85.7895	87.5571	86.3965	86.1169	88.3578	89.3191	92.0174	84.7497	90.5058	89.5783	86.4219	84.4551	84.4473	84.481	87.2212
			1377.43	91.017	87.1966	89.5165	85.0129	88.7401	85.7399	87.5096	86.3482	86.0285	88.2818	89.2508	91.9589	84.606	90.447	89.5155	86.2768	84.3244	84.3294	84.365	87.1312
			1377.91	90.9582	87.0777	89.4126	84.8509	88.6188	85.692	87.4511	86.2924	85.9019	88.1788	89.1446	91.881	84.4154	90.3613	89.4285	86.0797	84.1455	84.1629	84.1963	86.9947
			1378.39	90.8723	86.9181	89.2773	84.6342	88.4694	85.6483	87.3794	86.2279	85.7307	88.0407	88.9955	91.7784	84.1676	90.2433	89.3113	85.825	83.9081	83.939	83.9624	86.8029
			1378.88	90.7588	86.7104	89.1085	84.3572	88.2896	85.609	87.2922	86.1534	85.5104	87.8611	88.8009	91.6457	83.8549	90.0904	89.1589	85.5113	83.6043	83.6516	83.6546	86.5494
			1379.36	90.6192	86.4505	88.9068	84.019	88.0788	85.572	87.1879	86.0678	85.2397	87.6369	88.5613	91.4795	83.474	89.9029	88.9685	85.14	83.2308	83.2995	83.2701	86.233
			1379.84	90.4562	86.1366	88.6739	83.6213	87.8369	85.5339	87.0652	85.9706	84.9193	87.3682	88.279	91.2789	83.025	89.6827	88.7399	84.7118	82.7875	82.8841	82.8107	85.8556
			1380.32	90.2721	85.7673	88.4105	83.1652	87.5625	85.492	86.9228	85.8614	84.5486	87.0551	87.9554	91.0444	82.5079	89.4309	88.4728	84.2246	82.2743	82.4057	82.2782	85.419
			1380.8	90.0672	85.3398	88.1148	82.6487	87.2516	85.4448	86.759	85.7401	84.1241	86.6962	87.5894	90.7764	81.9196	89.1454	88.1658	83.6743	81.6877	81.8605	81.671	84.9222
			1381.29	89.8406	84.851	87.7836	82.0682	86.8987	85.3917	86.5725	85.6067	83.6401	86.2886	87.1786	90.4756	81.2553	88.8226	87.8167	83.0594	81.0221	81.2421	80.9848	84.362
			1381.77	89.5914	84.3007	87.4145	81.4225	86.5002	85.333	86.3632	85.4611	83.093	85.831	86.7224	90.1431	80.5131	88.46	87.4247	82.386	80.275	80.5462	80.2171	83.7373
			1382.25	89.3207	83.6954	87.0101	80.7178	86.0581	85.2685	86.1337	85.3043	82.4865	85.3273	86.2254	89.7828	79.7002	88.0598	86.9935	81.6695	79.4528	79.7769	79.3742	83.054
			1382.73	89.033	83.0503	86.5788	79.9704	85.5816	85.1974	85.8892	85.138	81.8341	84.7884	85.6993	89.402	78.8346	87.6313	86.5329	80.9322	78.5733	78.9497	78.4738	82.3274
			1383.21	88.7354	82.3859	86.1336	79.2032	85.0858	85.1192	85.637	84.9651	81.1564	84.231	85.1599	89.0105	77.9428	87.1889	86.0569	80.197	77.6634	78.089	77.5422	81.58
			1383.7	88.4357	81.7226	85.6885	78.4397	84.5873	85.0345	85.3842	84.7894	80.476	83.6736	84.624	88.6185	77.0525	86.7484	85.5802	79.4814	76.7511	77.2215	76.6072	80.8351
			1384.18	88.1409	81.0765	85.2551	77.6987	84.0999	84.946	85.1371	84.6151	79.8112	83.1322	84.1048	88.2348	76.1866	86.3225	85.1146	78.7968	75.8589	76.3693	75.6913	80.1118
			1384.66	87.856	80.4577	84.8411	76.9924	83.6333	84.8594	84.9006	84.4475	79.1738	82.6188	83.6114	87.8665	75.3604	85.9196	84.6673	78.1508	75.0011	75.5482	74.8093	79.423
			1385.14	87.5858	79.8733	84.4519	76.3295	83.1943	84.7832	84.6804	84.2927	78.5713	82.1437	83.1511	87.5205	74.5859	85.5447	84.2433	77.5534	74.1876	74.7702	73.9725	78.7781
			1385.62	87.3362	79.3333	84.0941	75.7214	82.7909	84.728	84.4843	84.1588	78.0115	81.7181	82.7338	87.2062	73.8773	85.203	83.848	77.023	73.4304	74.0501	73.1952	78.1887
			1386.11	87.1163	78.8551	83.7786	75.1869	82.4355	84.7035	84.3235	84.0552	77.5084	81.3574	82.3744	86.9365	73.2569	84.9025	83.4915	76.5859	72.7504	73.4112	72.5023	77.6727
			1386.59	86.9372	78.4635	83.5204	74.7522	82.1453	84.7148	84.21	83.99	77.0828	81.0794	82.0925	86.7262	72.7546	84.6552	83.1884	76.2692	72.179	72.8847	71.9289	77.2541
			1387.07	86.8089	78.1833	83.3352	74.4435	81.9378	84.7584	84.1524	83.9668	76.7583	80.8982	81.9049	86.5862	72.3985	84.4739	82.9548	76.0885	71.7496	72.5014	71.511	76.9555
			1387.55	86.7358	78.0282	83.2317	74.2744	81.823	84.8229	84.1505	83.9827	76.5509	80.8167	81.8179	86.5181	72.2022	84.3663	82.8004	76.0399	71.4833	72.2768	71.2692	76.7869
			1388.04	86.7148	77.9938	83.2078	74.2395	81.7984	84.8944	84.1952	84.0295	76.462	80.8247	81.8232	86.5125	72.1578	84.3306	82.7245	76.1043	71.3793	72.2046	71.1989	76.7405
			1388.52	86.7374	78.0612	83.2523	74.3186	81.8513	84.9627	84.2728	84.0978	76.4792	80.9038	81.903	86.5551	72.2421	84.3573	82.7166	76.2566	71.418	72.2613	71.2746	76.7959
			1389	86.7944	78.2068	83.3504	74.4867	81.9648	85.0249	84.3712	84.1809	76.5834	81.0358	82.0383	86.6321	72.4277	84.4336	82.7627	76.4744	71.5713	72.4183	71.4632	76.9295
			1389.48	86.878	78.409	83.4885	74.7217	82.1231	85.0832	84.482	84.2744	76.7545	81.2062	82.2137	86.7346	72.6906	84.547	82.849	76.7393	71.8123	72.6508	71.7342	77.1221
			1389.96	86.9816	78.6506	83.6547	75.0052	82.3121	85.141	84.6004	84.3755	76.9744	81.4045	82.4176	86.8566	73.0113	84.6869	82.9637	77.036	72.1175	72.9387	72.0622	77.3587
			1390.45	87.099	78.9167	83.8385	75.3213	82.5195	85.2002	84.7231	84.4805	77.2258	81.6216	82.6403	86.9936	73.3718	84.8438	83.0966	77.3504	72.466	73.265	72.4259	77.6272
			1390.93	87.2236	79.1943	84.0301	75.655	82.7342	85.2605	84.8472	84.5853	77.4928	81.849	82.8722	87.1409	73.7549	85.0094	83.2389	77.6709	72.8382	73.6137	72.8064	77.9164
			1391.41	87.3485	79.4731	84.2215	75.9935	82.9471	85.3198	84.9697	84.6857	77.7628	82.0795	83.105	87.2936	74.145	85.1773	83.384	77.9905	73.2183	73.9713	73.1887	78.2169
			1391.89	87.4689	79.7477	84.408	76.3289	83.1535	85.3764	85.0888	84.7791	78.029	82.3097	83.3333	87.4483	74.5323	85.3448	83.5291	78.3095	73.5973	74.3299	73.5655	78.5236
			1392.38	87.5829	80.0203	84.5899	76.6614	83.3546	85.4303	85.2048	84.8661	78.2931	82.5421	83.5569	87.6051	74.9165	85.5139	83.6774	78.6369	73.9767	74.6909	73.9402	78.8381
			1392.86	87.6934	80.3019	84.7724	77.0003	83.5579	85.4841	85.3208	84.9507	78.5665	82.7854	83.7823	87.7682	75.3087	85.6916	83.838	78.9871	74.3701	75.0662	74.3286	79.1701
			1393.34	87.807	80.6091	84.9649	77.3614	83.7754	85.5429	85.4419	85.0396	78.8666	83.053	84.0211	87.9456	75.7279	85.8882	84.0247	79.374	74.7987	75.4755	74.7549	79.5344
			1393.82	87.9319	80.9573	85.1761	77.7595	84.0188	85.6115	85.5727	85.1398	79.2096	83.3565	84.2853	88.1441	76.1928	86.1119	84.2499	79.7998	75.2824	75.9366	75.2417	79.9433
			1394.3	88.0732	81.3499	85.4084	78.1985	84.2919	85.691	85.7141	85.2545	79.5994	83.6971	84.5793	88.3646	76.7083	86.3631	84.5172	80.2489	75.8251	76.453	75.7952	80.3959
			1394.79	88.2285	81.7704	85.6542	78.663	84.5856	85.7764	85.8606	85.3803	80.02	84.0605	84.8937	88.5972	77.2565	86.6302	84.8152	80.6923	76.4056	77.0045	76.3943	80.8722
			1395.27	88.3882	82.1877	85.8986	79.1238	84.8809	85.8583	86.0016	85.5091	80.4405	84.4212	85.2077	88.824	77.802	86.8937	85.1209	81.1032	76.9838	77.5531	76.9971	81.3387
			1395.75	88.5407	82.5717	86.1278	79.5531	85.1593	85.928	86.1271	85.6325	80.8315	84.7558	85.4998	89.0289	78.3111	87.1367	85.4117	81.4721	77.5228	78.0632	77.5634	81.7662
			1396.23	88.6795	82.9101	86.3375	79.9407	85.4126	85.9823	86.2332	85.7476	81.1809	85.0554	85.7602	89.2062	78.7704	87.3539	85.6779	81.8097	78.0086	78.5211	78.0764	82.1456
			1396.71	88.8062	83.2122	86.5341	80.2969	85.6464	86.0244	86.3231	85.8575	81.4974	85.3277	85.9938	89.3632	79.1911	87.5529	85.9246	82.1401	78.4549	78.939	78.5482	82.4899
			1397.2	88.9294	83.5022	86.7309	80.6456	85.8739	86.0619	86.4055	85.9688	81.8033	85.5899	86.2168	89.5164	79.6	87.7488	86.1674	82.4896	78.8927	79.3453	79.0095	82.8259
			1397.68	89.0605	83.8078	86.9405	81.0127	86.1091	86.102	86.4912	86.0874	82.1221	85.8599	86.449	89.6852	80.0252	87.9567	86.4223	82.876	79.3542	79.7704	79.4929	83.1814
			1398.16	89.2088	84.1495	87.1692	81.4153	86.3596	86.1491	86.5897	86.2141	82.4677	86.1478	86.706	89.8849	80.4827	88.185	86.6979	83.2993	79.8583	80.2321	80.017	83.5745
			1398.64	89.3767	84.5306	87.4129	81.8527	86.6222	86.2021	86.7063	86.3431	82.8371	86.4503	86.9922	90.1194	80.9675	88.4308	86.9895	83.7402	80.4002	80.7265	80.5759	84.004
			1399.12	89.5573	84.9337	87.6571	82.3053	86.8833	86.2547	86.8389	86.4636	83.2099	86.752	87.2976	90.3782	81.4534	88.6795	87.2801	84.1681	80.9506	81.227	81.1383	84.4484
			1399.61	89.7367	85.3285	87.884	82.7427	87.126	86.2991	86.9795	86.5647	83.5582	87.0333	87.6022	90.6395	81.9058	88.9125	87.5482	84.5568	81.4697	81.6971	81.6627	84.8754
			1400.09	89.9009	85.6864	88.0816	83.1394	87.339	86.3302	87.1175	86.6416	83.8616	87.2806	87.8856	90.8808	82.3001	89.1163	87.7797	84.8946	81.928	82.1097	82.1191	85.2584
			1400.57	90.0414	85.9923	88.2483	83.4848	87.5212	86.3477	87.2445	86.697	84.1156	87.4926	88.136	91.0879	82.6315	89.288	87.9736	85.1848	82.3177	82.4584	82.501	85.5871
			1401.05	90.1566	86.2464	88.3907	83.7822	87.6793	86.3561	87.3562	86.7382	84.3293	87.6773	88.3514	91.2576	82.9117	89.4337	88.1391	85.4386	82.6504	82.7541	82.8225	85.867
			1401.54	90.2499	86.4579	88.5185	84.0418	87.8223	86.361	87.4518	86.7735	84.5176	87.8452	88.536	91.3942	83.1589	89.5632	88.2891	85.6668	82.9448	83.0153	83.1056	86.1109
			1402.02	90.3263	86.6374	88.6394	84.2733	87.9569	86.3674	87.5318	86.8086	84.694	88.0049	88.6957	91.5049	83.3883	89.6848	88.4337	85.8762	83.2172	83.2578	83.3694	86.3312
			1402.5	90.3903	86.7932	88.7571	84.4817	88.0853	86.3785	87.5969	86.8462	84.8665	88.1596	88.8343	91.596	83.608	89.8034	88.5782	86.0684	83.4756	83.4905	83.6249	86.5354
			1402.98	90.4452	86.93	88.8708	84.667	88.2049	86.3952	87.6477	86.8857	85.0375	88.308	88.9538	91.672	83.8187	89.9192	88.7217	86.2407	83.7191	83.7138	83.8733	86.7249
			1403.46	90.4933	87.0495	88.9761	84.8263	88.3098	86.416	87.6847	86.924	85.2036	88.4447	89.0543	91.7357	84.015	90.0289	88.8589	86.3884	83.9401	83.9221	84.1079	86.8964
			1403.95	90.5357	87.1527	89.0666	84.9565	88.3928	86.4369	87.7087	86.956	85.3575	88.5631	89.1362	91.7888	84.1891	90.1266	88.9816	86.5078	84.1285	84.1063	84.3175	87.0444
			1404.43	90.5729	87.2409	89.136	85.0568	88.4484	86.4527	87.7216	86.9761	85.4903	88.6576	89.2006	91.8325	84.3342	90.2062	89.0819	86.5978	84.2761	84.2588	84.491	87.1641
			1404.91	90.604	87.3159	89.1811	85.1296	88.4748	86.458	87.7251	86.98	85.5944	88.7262	89.2497	91.8675	84.4469	90.2632	89.1548	86.6592	84.3813	84.3766	84.6215	87.2538
			1405.39	90.627	87.3786	89.2017	85.1782	88.4746	86.449	87.7205	86.9654	85.6646	88.7693	89.2849	91.8936	84.5274	90.2958	89.1996	86.6937	84.448	84.4613	84.7083	87.3144
			1405.88	90.6394	87.4278	89.2008	85.2043	88.4531	86.4244	87.7075	86.9327	85.6995	88.7895	89.3059	91.9096	84.577	90.305	89.2181	86.7021	84.4828	84.5162	84.7544	87.3483
			1406.36	90.639	87.4606	89.1823	85.2069	88.4156	86.3859	87.6852	86.8843	85.7005	88.7888	89.3104	91.9135	84.5965	90.2933	89.2133	86.6847	84.4908	84.5443	84.7644	87.3573
			1406.84	90.6252	87.4733	89.1503	85.1838	88.3667	86.3365	87.6528	86.824	85.6713	88.7689	89.2959	91.904	84.5859	90.2634	89.1874	86.6424	84.4747	84.5462	84.7423	87.3427
			1407.32	90.5993	87.4643	89.1085	85.1342	88.3105	86.2804	87.611	86.7564	85.6173	88.7317	89.2615	91.8809	84.546	90.2187	89.1428	86.5779	84.436	84.5224	84.6918	87.3064
			1407.8	90.5644	87.4342	89.0606	85.0608	88.2507	86.222	87.5618	86.6863	85.5455	88.6804	89.2095	91.8461	84.4803	90.1631	89.0825	86.4959	84.3768	84.4739	84.6182	87.2519
			1408.29	90.5249	87.3861	89.0096	84.9694	88.1912	86.1651	87.5082	86.618	85.4636	88.6191	89.1446	91.8024	84.3945	90.1008	89.0105	86.4019	84.3012	84.4037	84.5275	87.184
			1408.77	90.4848	87.3241	88.9582	84.8677	88.1349	86.1129	87.4531	86.5547	85.3785	88.5525	89.0732	91.7534	84.2959	90.0356	88.9316	86.3002	84.2136	84.3159	84.4262	87.1081
			1409.25	90.4464	87.2512	88.9069	84.7621	88.0824	86.0668	87.3984	86.4975	85.2942	88.4836	89.0008	91.7014	84.1907	89.97	88.85	86.1929	84.1174	84.2141	84.3187	87.0276
			1409.73	90.4098	87.1682	88.8544	84.6556	88.0315	86.0263	87.3441	86.4452	85.211	88.4128	88.9305	91.6471	84.0822	89.9043	88.7679	86.0791	84.0129	84.1	84.2054	86.9429
			1410.21	90.3725	87.0736	88.7977	84.5469	87.9773	85.9892	87.2883	86.3946	85.1249	88.3376	88.8619	91.5892	83.969	89.8364	88.6851	85.9563	83.8972	83.9731	84.0827	86.8509
			1410.7	90.3308	86.9652	88.7335	84.4316	87.9144	85.9526	87.2286	86.3423	85.0305	88.2539	88.7916	91.5256	83.8471	89.7632	88.5995	85.8227	83.7664	83.832	83.9451	86.7465
			1411.18	90.2814	86.8422	88.6606	84.3054	87.8392	85.9141	87.1634	86.2861	84.9231	88.1583	88.715	91.4548	83.7124	89.6826	88.5082	85.6794	83.6182	83.6767	83.7886	86.6266
			1411.66	90.2232	86.7072	88.5803	84.1671	87.7523	85.873	87.093	86.226	84.8024	88.0508	88.6293	91.3775	83.5638	89.5945	88.4101	85.5302	83.4547	83.5106	83.6145	86.4918
			1412.14	90.1576	86.5658	88.4962	84.0198	87.6575	85.8299	87.0195	86.1643	84.6715	87.9347	88.5338	91.2964	83.4039	89.5017	88.3058	85.38	83.2823	83.3397	83.4287	86.3471
			1412.62	90.0871	86.4242	88.4117	83.8688	87.5601	85.7862	86.9457	86.1032	84.5353	87.8149	88.4302	91.2151	83.2373	89.408	88.1971	85.2322	83.1081	83.1702	83.2399	86.1994
			1413.11	90.0144	86.2865	88.3282	83.7187	87.464	85.7428	86.8734	86.0439	84.3977	87.6957	88.3208	91.1359	83.0681	89.3169	88.0855	85.087	82.9368	83.0057	83.0545	86.0543
			1413.59	89.9403	86.1527	88.244	83.5708	87.3696	85.6995	86.8028	85.9856	84.259	87.5786	88.2071	91.0586	82.8971	89.2294	87.9705	84.9413	82.7682	82.8447	82.8746	85.9132
			1414.07	89.864	86.019	88.155	83.4227	87.2742	85.655	86.7323	85.9258	84.1165	87.4627	88.0891	90.9806	82.7222	89.1448	87.8503	84.7906	82.5974	82.6818	82.6969	85.7732
			1414.55	89.7836	85.8795	88.0571	83.2697	87.1737	85.6075	86.6593	85.8619	83.9663	87.3456	87.9659	90.8979	82.5398	89.0609	87.7224	84.6313	82.418	82.51	82.5157	85.6288
			1415.04	89.6976	85.7285	87.9475	83.1071	87.0647	85.5561	86.5817	85.7929	83.8058	87.226	87.8369	90.8067	82.3474	88.9758	87.5856	84.4621	82.2255	82.3243	82.3259	85.4751
			1415.52	89.605	85.5632	87.8268	82.9328	86.9466	85.5015	86.4983	85.7201	83.6351	87.1044	87.7023	90.7057	82.1455	88.8891	87.4411	84.284	82.02	82.1239	82.126	85.3096
			1416	89.5067	85.3833	87.6978	82.7468	86.8211	85.446	86.4089	85.6468	83.4565	86.9836	87.5628	90.5963	81.9369	88.8013	87.2919	84.0976	81.8058	81.9118	81.9181	85.1331
			1416.48	89.4037	85.1893	87.5632	82.5494	86.6902	85.3929	86.3137	85.5767	83.2711	86.8665	87.4177	90.4824	81.7225	88.7124	87.1404	83.8995	81.5873	81.6918	81.7043	84.9474
			1416.96	89.2959	84.9793	87.4218	82.3363	86.5526	85.3453	86.2118	85.5109	83.0737	86.7514	87.2626	90.3688	81.4954	88.6186	86.9847	83.6777	81.3626	81.4622	81.4808	84.7515
			1417.45	89.1808	84.7453	87.2649	82.0949	86.3994	85.3039	86.1004	85.446	82.8481	86.6278	87.0869	90.2582	81.2344	88.509	86.8145	83.4121	81.1157	81.2089	81.2309	84.5366
			1417.93	89.053	84.473	87.0761	81.8039	86.2131	85.2656	85.9758	85.3722	82.5677	86.4746	86.8751	90.149	80.9039	88.3656	86.61	83.083	80.8139	80.9036	80.9232	84.2852
			1418.41	88.9069	84.1487	86.8385	81.4425	85.9745	85.2238	85.8363	85.2769	82.2066	86.2658	86.6141	90.0336	80.4668	88.1693	86.3493	82.6874	80.4195	80.5135	80.5224	83.9773
			1418.89	88.7416	83.772	86.5488	81.0084	85.6767	85.1712	85.6861	85.1534	81.7615	85.9876	86.3055	89.9014	79.9129	87.9139	86.0244	82.2473	79.9156	80.0244	80.0149	83.6062
			1419.37	88.5638	83.3617	86.2255	80.5269	85.3363	85.1047	85.5346	85.0077	81.2634	85.6515	85.9697	89.745	79.2767	87.6157	85.653	81.7968	79.327	79.459	79.4276	83.1884
			1419.86	88.3837	82.9452	85.8991	80.0365	84.9837	85.0279	85.3905	84.8554	80.7615	85.2885	85.6338	89.5635	78.6191	87.3042	85.2698	81.3564	78.7064	78.8641	78.8123	82.7542
			1420.34	88.2076	82.5381	85.5911	79.5611	84.6429	84.9468	85.2548	84.7105	80.2906	84.9256	85.312	89.3592	77.9867	87.0025	84.9031	80.9201	78.0966	78.2777	78.209	82.3244
			1420.82	88.0339	82.1346	85.3032	79.0969	84.3182	84.8662	85.1198	84.5776	79.8554	84.5695	84.9986	89.1314	77.3883	86.7147	84.561	80.4603	77.5056	77.7068	77.6217	81.896
			1421.3	87.8555	81.712	85.0207	78.616	83.9963	84.7875	84.973	84.4518	79.436	84.2065	84.6726	88.8741	76.7994	86.4288	84.2338	79.9389	76.9078	77.1294	77.0212	81.4443
			1421.79	87.6634	81.2401	84.7212	78.0799	83.655	84.7097	84.8011	84.3234	79.002	83.8106	84.307	88.5769	76.1798	86.1243	83.9027	79.3203	76.2593	76.5088	76.3596	80.9324
			1422.27	87.4524	80.6925	84.3843	77.4523	83.2733	84.6316	84.5943	84.1825	78.5258	83.3553	83.8789	88.2302	75.49	85.7818	83.5507	78.5883	75.5155	75.8097	75.5885	80.3235
			1422.75	87.2247	80.06	84.0012	76.7163	82.8414	84.5536	84.3517	84.0243	77.9963	82.8258	83.3806	87.8326	74.7108	85.3922	83.1715	77.7654	74.6523	75.017	74.6803	79.5973
			1423.23	86.9959	79.3661	83.5846	75.8936	82.3728	84.4793	84.0868	83.8535	77.4317	82.2341	82.832	87.4005	73.8623	84.9677	82.7793	76.926	73.6897	74.1571	73.6543	78.7702
			1423.71	86.7942	78.6763	83.1749	75.0574	81.9101	84.4156	83.8301	83.687	76.8863	81.6302	82.2881	86.9739	73.0165	84.5475	82.4129	76.1857	72.709	73.3091	72.5962	77.9113
			1424.19	86.6537	78.0859	82.8317	74.3216	81.5178	84.3704	83.6225	83.5505	76.4392	81.0942	81.828	86.6091	72.2847	84.1909	82.1266	75.659	71.8408	72.5915	71.6469	77.1338
			1424.68	86.5995	77.6855	82.6114	73.799	81.2583	84.3494	83.4992	83.4681	76.163	80.7083	81.526	86.3592	71.7759	83.9552	81.9688	75.4151	71.2176	72.1178	70.9527	76.5558
			1425.16	86.6387	77.5253	82.544	73.5574	81.1667	84.3541	83.4765	83.4526	76.0951	80.5238	81.422	86.2531	71.5543	83.8726	81.9631	75.4648	70.9215	71.951	70.6076	76.2541
			1425.64	86.7623	77.6083	82.6293	73.6077	81.246	84.3831	83.5509	83.5041	76.234	80.5508	81.5166	86.2922	71.6286	83.9453	82.1064	75.7831	70.9682	72.0947	70.6332	76.2484
			1426.12	86.9566	77.911	82.8509	73.9256	81.481	84.4351	83.7093	83.6161	76.5586	80.7735	81.7884	86.4626	71.9759	84.1585	82.3835	76.3397	71.3317	72.5185	71.0041	76.5198
			1426.61	87.2122	78.4093	83.1923	74.4828	81.8559	84.5119	83.9402	83.7827	77.0497	81.1714	82.2155	86.75	72.5717	84.4959	82.7814	77.1156	71.9793	73.1894	71.6847	77.0412
			1427.09	87.5274	79.0908	83.6457	75.2624	82.3629	84.6183	84.2383	84.0026	77.7005	81.7316	82.7859	87.147	73.4061	84.9492	83.2964	78.1017	72.8918	74.089	72.6509	77.7939
			1427.57	87.9057	79.9525	84.2102	76.2579	83.0005	84.7606	84.6029	84.2778	78.5133	82.4471	83.495	87.6512	74.4797	85.5154	83.9308	79.2843	74.0616	75.2094	73.8895	78.7672
			1428.05	88.349	80.9871	84.8834	77.4579	83.763	84.9433	85.032	84.609	79.4866	83.3075	84.3353	88.2574	75.7869	86.1893	84.6833	80.6268	75.4756	76.538	75.3805	79.9448
			1428.53	88.8503	82.1663	85.6504	78.8266	84.6291	85.1646	85.5147	84.9899	80.5987	84.2847	85.2822	88.9476	77.2936	86.953	85.5371	82.0587	77.0928	78.0366	77.075	81.2863
			1429.02	89.3888	83.4299	86.4759	80.2922	85.5543	85.4138	86.027	85.4026	81.7972	85.3261	86.2869	89.6854	78.9234	87.7692	86.4526	83.4827	78.83	79.6299	78.8816	82.7174
			1429.5	89.9316	84.6923	87.307	81.7537	86.4757	85.671	86.5345	85.8194	83.0032	86.3594	87.2813	90.4193	80.5642	88.5845	87.3711	84.7999	80.5697	81.2133	80.6762	84.1376
			1429.98	90.4422	85.8643	88.0864	83.1071	87.3287	85.9134	87.0017	86.2092	84.1314	87.3114	88.1955	91.0971	82.0971	89.3431	88.2305	85.938	82.1892	82.6787	82.3332	85.4461
			1430.46	90.8914	86.8791	88.7687	84.2751	88.0658	86.1217	87.4026	86.547	85.1153	88.1293	88.9793	91.6802	83.4314	90.0028	88.983	86.8656	83.5958	83.9461	83.7612	86.5709
			1430.94	91.264	87.7064	89.3312	85.2237	88.6668	86.2854	87.7263	86.8202	85.9216	88.7908	89.6116	92.1518	84.524	90.5435	89.6053	87.5877	84.7464	84.9791	84.9211	87.4824
			1431.43	91.5581	88.3491	89.7726	85.9574	89.136	86.4029	87.9756	87.0282	86.5499	89.3013	90.0979	92.5146	85.3764	90.9664	90.098	88.1317	85.6437	85.7809	85.8207	88.1881
			1431.91	91.781	88.8308	90.107	86.5058	89.4927	86.4795	88.1604	87.1787	87.0214	89.6831	90.4596	92.7834	86.0195	91.2859	90.4769	88.5333	86.3201	86.3808	86.4968	88.7182
			1432.39	91.9442	89.1835	90.3554	86.9073	89.7614	86.5236	88.2931	87.2837	87.3677	89.9651	90.7232	92.9771	86.4963	91.5229	90.7651	88.8277	86.8205	86.8189	86.9974	89.1101
			1432.87	92.06	89.439	90.5403	87.2	89.966	86.5447	88.385	87.3553	87.6218	90.1753	90.9138	93.1144	86.8504	91.6985	90.9868	89.0456	87.1909	87.137	87.3701	89.4001
			1433.36	92.1398	89.6248	90.6817	87.4167	90.1264	86.5519	88.445	87.4042	87.814	90.3379	91.0525	93.2113	87.1207	91.8319	91.1642	89.2121	87.4718	87.3732	87.6561	89.6188
			1433.84	92.1932	89.7636	90.7964	87.5836	90.2582	86.5541	88.4801	87.4391	87.9696	90.4726	91.1551	93.2809	87.3387	91.938	91.3163	89.3465	87.6964	87.5602	87.889	89.7905
			1434.32	92.2286	89.8731	90.897	87.7207	90.3726	86.56	88.496	87.4668	88.1086	90.594	91.2334	93.3333	87.5291	92.0282	91.4585	89.4629	87.8904	87.7246	88.0935	89.9334
			1434.8	92.2534	89.967	90.9918	87.8421	90.477	86.5782	88.4985	87.4925	88.2454	90.7115	91.2956	93.376	87.7091	92.1093	91.6009	89.5696	88.0714	87.8862	88.2856	90.06
			1435.28	92.2747	90.0549	91.0846	87.9561	90.5743	86.6158	88.4945	87.5197	88.3872	90.8286	91.3481	93.4146	87.8876	92.1842	91.7476	89.6688	88.249	88.0563	88.4715	90.1769
			1435.77	92.2995	90.1429	91.1739	88.0651	90.6635	86.6753	88.4931	87.5496	88.5319	90.9408	91.3958	93.453	88.0626	92.252	91.8936	89.7571	88.423	88.2347	88.6466	90.2851
			1436.25	92.3327	90.2321	91.2536	88.1662	90.7402	86.7494	88.5032	87.5803	88.6674	91.037	91.4428	93.4927	88.2219	92.3098	92.0249	89.8288	88.5844	88.4077	88.7978	90.381
			1436.73	92.3752	90.3193	91.3167	88.2537	90.8002	86.8212	88.5299	87.6073	88.7769	91.1053	91.4916	93.5335	88.3495	92.3557	92.1254	89.8809	88.7205	88.5542	88.9122	90.4597
			1437.21	92.4221	90.3988	91.3607	88.3237	90.843	86.8727	88.5703	87.6264	88.8499	91.1415	91.5417	93.5729	88.4369	92.3913	92.1874	89.9151	88.8245	88.6586	88.9875	90.5195
			1437.69	92.4656	90.4659	91.3886	88.3766	90.8715	86.8959	88.6162	87.6359	88.8877	91.151	91.5901	93.6085	88.4879	92.4198	92.2159	89.9349	88.8979	88.7195	89.0326	90.5628
			1438.18	92.4996	90.518	91.4056	88.4142	90.889	86.8947	88.6593	87.6377	88.899	91.1431	91.6325	93.6376	88.5122	92.443	92.2219	89.9424	88.9467	88.7451	89.0585	90.5928
			1438.66	92.5205	90.5535	91.4146	88.4376	90.8962	86.8781	88.6947	87.6343	88.8919	91.1243	91.6644	93.6583	88.5171	92.4596	92.2148	89.9376	88.974	88.7442	89.0709	90.6104
			1439.14	92.5274	90.5703	91.4158	88.4455	90.8915	86.8546	88.7207	87.6279	88.8697	91.097	91.6825	93.6687	88.5043	92.4663	92.1983	89.9185	88.9786	88.7209	89.0686	90.6141
			1439.62	92.5209	90.5661	91.4069	88.4348	90.8717	86.8295	88.7369	87.6195	88.832	91.06	91.6842	93.6669	88.471	92.4588	92.1722	89.8825	88.956	88.6749	89.0459	90.601
			1440.11	92.5022	90.5387	91.3845	88.4018	90.8339	86.8042	88.7435	87.6083	88.7756	91.011	91.6674	93.6516	88.4115	92.4335	92.1336	89.826	88.8998	88.6036	88.9958	90.5678
			1440.59	92.4731	90.4855	91.3447	88.3423	90.7753	86.7774	88.7398	87.5922	88.6965	90.9474	91.6307	93.6217	88.3192	92.3877	92.0783	89.7438	88.804	88.5027	88.9109	90.5112
			1441.07	92.4343	90.4032	91.2832	88.2508	90.6939	86.746	88.7241	87.5674	88.5892	90.8658	91.5716	93.5756	88.1864	92.32	92.0013	89.6269	88.6616	88.3666	88.7835	90.4267
			1441.55	92.3845	90.2861	91.1948	88.1189	90.5866	86.7067	88.6933	87.5288	88.4468	90.7609	91.4851	93.5103	88.0039	92.2283	91.8959	89.4616	88.4639	88.1867	88.6034	90.3063
			1442.03	92.3192	90.1245	91.0731	87.9336	90.4485	86.657	88.643	87.4712	88.2599	90.624	91.3625	93.4201	87.7597	92.1086	91.7538	89.2297	88.1987	87.9497	88.3566	90.1371
			1442.52	92.2306	89.9052	90.9112	87.6788	90.2723	86.5965	88.5684	87.3902	88.0169	90.4437	91.1917	93.2966	87.4393	91.9544	91.5655	88.9129	87.8501	87.6382	88.025	89.9017
			1443	92.1097	89.6138	90.7031	87.3375	90.05	86.5263	88.4647	87.2833	87.7065	90.207	90.9598	93.1304	87.0289	91.758	91.3226	88.4975	87.4019	87.2337	87.5898	89.5815
			1443.48	91.9485	89.2393	90.4457	86.8976	89.7756	86.4487	88.329	87.1516	87.3214	89.9043	90.657	92.9137	86.5192	91.513	91.0208	87.9809	86.843	86.7226	87.0376	89.1625
			1443.96	91.7438	88.7795	90.1412	86.357	89.4486	86.3663	88.1612	86.9991	86.8615	89.5328	90.2813	92.6442	85.9107	91.2181	90.6626	87.3746	86.1731	86.102	86.3666	88.6415
			1444.44	91.4994	88.2441	89.7985	85.7274	89.0757	86.2817	87.965	86.8331	86.337	89.0996	89.8409	92.3276	85.217	90.8796	90.2585	86.705	85.4067	85.3835	85.5909	88.0295
			1444.93	91.2265	87.6559	89.4327	85.0354	88.6724	86.1977	87.7481	86.6634	85.7686	88.6227	89.3557	91.978	84.4654	90.5122	89.827	86.0136	84.5742	84.5949	84.7418	87.3531
			1445.41	90.9438	87.0512	89.0654	84.3224	88.2622	86.1185	87.5232	86.5019	85.1881	88.1313	88.8565	91.6188	83.6981	90.1391	89.3932	85.3563	83.7223	83.7797	83.8681	86.654
			1445.89	90.6772	86.4794	88.7243	83.6447	87.877	86.0506	87.3087	86.3623	84.6384	87.665	88.3853	91.2817	82.9725	89.7911	88.9888	84.8021	82.9144	82.998	83.0361	85.9887
			1446.37	90.4583	86.0017	88.4433	83.0731	87.5564	86.0029	87.1286	86.2603	84.1736	87.2731	87.9938	91.0053	82.361	89.5051	88.651	84.4261	82.2297	82.3257	82.3286	85.4269
			1446.86	90.3209	85.6845	88.2593	82.6857	87.343	85.9859	87.011	86.2111	83.8539	87.009	87.7379	90.8308	81.9448	89.32	88.4198	84.2918	81.757	81.8486	81.8376	85.045
			1447.34	90.2916	85.583	88.2032	82.5493	87.2729	86.0073	86.9804	86.2251	83.7318	86.9172	87.6632	90.7905	81.794	89.2664	88.3282	84.4239	81.5732	81.6427	81.6431	84.9076
			1447.82	90.3779	85.7175	88.2871	82.6916	87.3595	86.0671	87.0468	86.302	83.8303	87.0143	87.7857	90.8938	81.9389	89.353	88.3895	84.7907	81.7122	81.7438	81.7799	85.041
			1448.3	90.5615	86.058	88.4948	83.0817	87.5841	86.1557	87.1982	86.4281	84.1277	87.277	88.0786	91.1184	82.3484	89.5596	88.5871	85.3139	82.1417	82.125	82.2148	85.4143
			1448.78	90.8046	86.5331	88.7872	83.6394	87.9018	86.2574	87.4039	86.5815	84.5639	87.6492	88.481	91.4184	82.94	89.8437	88.88	85.902	82.7729	82.704	82.8562	85.9496
			1449.27	91.0654	87.0612	89.1185	84.2695	88.2608	86.3574	87.6279	86.7407	85.0675	88.0667	88.9238	91.7436	83.6155	90.1588	89.2202	86.4824	83.4986	83.3796	83.5943	86.5542
			1449.75	91.3126	87.5777	89.4524	84.8953	88.6208	86.4476	87.8418	86.8918	85.5808	88.4793	89.3533	92.0564	84.2957	90.4702	89.5692	87.013	84.2317	84.068	84.3393	87.154
			1450.23	91.5298	88.0455	89.7674	85.4708	88.9588	86.5266	88.0302	87.0294	86.0694	88.8584	89.7395	92.3369	84.9339	90.7594	89.9038	87.4765	84.9191	84.7173	85.0368	87.7046
			1450.71	91.7123	88.4494	90.0539	85.976	89.2658	86.5977	88.1886	87.1537	86.5177	89.1926	90.0714	92.5788	85.5095	91.0199	90.2128	87.8693	85.5365	85.3027	85.6618	88.1864
			1451.19	91.8612	88.7861	90.3084	86.4048	89.5393	86.6649	88.3186	87.2665	86.9189	89.4796	90.3481	92.7822	86.0156	91.2506	90.491	88.1928	86.0749	85.8145	86.2049	88.5934
			1451.68	91.9794	89.0568	90.5288	86.7565	89.7786	86.7298	88.424	87.3683	87.2682	89.7196	90.5719	92.9484	86.4492	91.4513	90.7347	88.4491	86.531	86.2485	86.663	88.9255
			1452.16	92.0697	89.2638	90.7133	87.0323	89.9823	86.7904	88.5078	87.4575	87.5603	89.9135	90.7455	93.0785	86.8077	91.6212	90.9404	88.6415	86.9035	86.6025	87.035	89.1844
			1452.64	92.1341	89.411	90.8611	87.2357	90.1492	86.8419	88.5716	87.5316	87.7913	90.0637	90.8718	93.1731	87.0905	91.7595	91.1063	88.7756	87.1946	86.8776	87.3238	89.3745
			1453.12	92.1745	89.5051	90.9741	87.3744	90.2805	86.8787	88.6153	87.5885	87.9622	90.1751	90.9545	93.2339	87.3016	91.8677	91.2343	88.8594	87.4114	87.0801	87.5381	89.5041
			1453.61	92.1925	89.5548	91.0571	87.4594	90.3798	86.8976	88.6381	87.6284	88.08	90.2561	90.9987	93.264	87.4513	91.9502	91.3303	88.9019	87.5672	87.2217	87.6925	89.5842
			1454.09	92.1896	89.5695	91.1167	87.5035	90.4532	86.8994	88.6389	87.6544	88.1564	90.3173	91.0096	93.2676	87.5533	92.0134	91.4032	88.9108	87.6776	87.3171	87.8047	89.6275
			1454.57	92.1663	89.5573	91.1594	87.5182	90.5071	86.8902	88.6168	87.6721	88.2056	90.3695	90.9919	93.2491	87.6226	92.0642	91.4627	88.8917	87.7573	87.3798	87.8913	89.6446
			1455.05	92.1229	89.5244	91.1906	87.5129	90.5471	86.8818	88.5719	87.6893	88.2414	90.4227	90.9491	93.2125	87.6721	92.1086	91.5173	88.8485	87.8169	87.4199	87.9649	89.644
			1455.53	92.0611	89.476	91.2127	87.4945	90.5765	86.893	88.5082	87.7155	88.2758	90.4835	90.8851	93.163	87.7112	92.1497	91.5727	88.787	87.8606	87.4423	88.0309	89.6316
			1456.02	91.9889	89.4206	91.2265	87.4701	90.5963	86.9485	88.4382	87.7601	88.3178	90.5524	90.8093	93.1103	87.7452	92.1865	91.6297	88.7206	87.8858	87.4471	88.0855	89.6135
			1456.5	91.9266	89.3742	91.2311	87.4492	90.6057	87.0683	88.3872	87.8281	88.3691	90.619	90.7412	93.0709	87.7745	92.2125	91.6808	88.6703	87.8857	87.4326	88.1151	89.598
			1456.98	91.9043	89.3585	91.2272	87.4434	90.6034	87.2457	88.3858	87.9121	88.4199	90.6622	90.708	93.0644	87.795	92.2189	91.7114	88.6522	87.8564	87.401	88.1041	89.5949
			1457.46	91.9402	89.3854	91.2181	87.4576	90.5896	87.436	88.446	87.9926	88.4522	90.6633	90.7254	93.0969	87.801	92.2014	91.7083	88.6611	87.8042	87.3597	88.0491	89.6071
			1457.94	92.022	89.4424	91.207	87.4835	90.5653	87.5865	88.5463	88.0528	88.453	90.6228	90.7807	93.1522	87.7893	92.1656	91.6711	88.6768	87.7418	87.3157	87.9648	89.6247
			1458.43	92.1184	89.5041	91.1941	87.5058	90.531	87.676	88.6518	88.09	88.4222	90.5561	90.8454	93.2054	87.7597	92.1205	91.6102	88.6809	87.6754	87.2679	87.868	89.6322
			1458.91	92.2038	89.5502	91.1776	87.5126	90.487	87.714	88.7403	88.111	88.3673	90.4787	90.8975	93.2404	87.7136	92.0718	91.5365	88.6653	87.603	87.2107	87.767	89.6188
			1459.39	92.2665	89.5723	91.156	87.4994	90.434	87.7195	88.8056	88.1232	88.2962	90.3991	90.9283	93.2527	87.6529	92.0219	91.4572	88.6301	87.5202	87.1393	87.6624	89.5816
			1459.87	92.3044	89.57	91.1295	87.4671	90.3746	87.7074	88.8506	88.1305	88.2155	90.3211	90.938	93.2446	87.5803	91.9716	91.377	88.5795	87.4252	87.053	87.5537	89.5234
			1460.36	92.3202	89.5468	91.1	87.4192	90.3123	87.6864	88.8804	88.1342	88.1302	90.2464	90.9303	93.2209	87.4993	91.9217	91.2993	88.5182	87.3195	86.9548	87.4413	89.4495
			1460.84	92.3173	89.5072	91.0698	87.3599	90.2508	87.6614	88.9001	88.1345	88.0444	90.1758	90.9092	93.1863	87.4131	91.8734	91.2268	88.45	87.2064	86.8492	87.3269	89.3658
			1461.32	92.2992	89.4546	91.0404	87.2926	90.1928	87.6359	88.9131	88.1316	87.9608	90.11	90.8773	93.1446	87.3238	91.827	91.1612	88.3759	87.0888	86.7402	87.2115	89.2767
			1461.8	92.2685	89.3906	91.0122	87.219	90.1389	87.6128	88.9214	88.1263	87.8803	90.0483	90.8353	93.098	87.2311	91.782	91.1021	88.2942	86.9679	86.6295	87.0943	89.1839
			1462.28	92.2272	89.3141	90.9836	87.1387	90.0879	87.5959	88.9261	88.1201	87.8015	89.9887	90.7817	93.047	87.1311	91.7364	91.047	88.2004	86.8415	86.5155	86.9711	89.0865
			1462.77	92.1767	89.2217	90.951	87.0489	90.036	87.5897	88.9271	88.1151	87.721	89.9272	90.7131	92.9909	87.0173	91.6867	90.9909	88.0884	86.7047	86.3934	86.835	88.9803
			1463.25	92.1192	89.1087	90.9095	86.9453	89.9777	87.599	88.9235	88.1136	87.6333	89.8586	90.6259	92.9281	86.8814	91.6289	90.9273	87.9529	86.5503	86.2562	86.6771	88.8593
			1463.73	92.0584	88.9719	90.8541	86.8241	89.9074	87.627	88.9145	88.1181	87.5329	89.7773	90.5182	92.8577	86.7168	91.5598	90.8492	87.7927	86.3723	86.0967	86.4905	88.7182
			1464.21	91.9996	88.8126	90.7828	86.6841	89.8221	87.6739	88.8996	88.1293	87.4168	89.6799	90.3923	92.78	86.5233	91.4794	90.7524	87.6129	86.1698	85.9126	86.2742	88.5553
			1464.69	91.9478	88.639	90.6983	86.5283	89.7235	87.7345	88.8791	88.1459	87.2865	89.568	90.2561	92.6976	86.3105	91.3916	90.6385	87.4228	85.9491	85.7085	86.0368	88.375
			1465.18	91.9046	88.4625	90.6072	86.3623	89.6171	87.8005	88.854	88.1639	87.1473	89.4472	90.1191	92.6136	86.0926	91.3023	90.5138	87.2299	85.7206	85.4942	85.7919	88.1861
			1465.66	91.8664	88.2913	90.5153	86.1898	89.5086	87.8643	88.8255	88.1787	87.0044	89.3241	89.9867	92.5289	85.8801	91.2151	90.3856	87.0353	85.4917	85.278	85.5497	87.9954
			1466.14	91.8259	88.1258	90.4239	86.0102	89.3995	87.9222	88.7933	88.1871	86.8589	89.2015	89.8574	92.4419	85.6732	91.129	90.2571	86.8347	85.2616	85.0612	85.3101	87.804
			1466.62	91.776	87.9602	90.33	85.8194	89.2878	87.9741	88.7568	88.1873	86.7077	89.0781	89.725	92.349	85.4635	91.0392	90.1271	86.6227	85.0232	84.8386	85.0655	87.6079
			1467.1	91.7119	87.7869	90.229	85.6133	89.1695	88.0214	88.7146	88.1796	86.5464	88.9501	89.583	92.2469	85.2404	90.9406	89.9922	86.3954	84.7686	84.6036	84.8061	87.4021
			1467.59	91.6316	87.6004	90.1177	85.3899	89.0418	88.0644	88.666	88.1646	86.3718	88.8142	89.4272	92.1336	84.9967	90.8303	89.8499	86.1519	84.4934	84.3519	84.5257	87.1832
			1468.07	91.5358	87.3983	89.9955	85.1504	88.9042	88.1026	88.6109	88.1439	86.1837	88.6686	89.2566	92.0091	84.7303	90.7082	89.6998	85.8935	84.198	84.0833	84.2235	86.951
			1468.55	91.426	87.1806	89.8644	84.898	88.7584	88.1349	88.5495	88.1194	85.9848	88.5136	89.0723	91.8742	84.4437	90.577	89.5442	85.622	83.8866	83.8014	83.9029	86.7077
			1469.03	91.3043	86.9485	89.7277	84.6365	88.6074	88.1611	88.4829	88.0936	85.7792	88.3509	88.8766	91.7301	84.1413	90.4407	89.3864	85.3392	83.5651	83.5114	83.5697	86.4557
			1469.52	91.1722	86.7033	89.5894	84.3696	88.4548	88.183	88.4124	88.07	85.572	88.1835	88.6712	91.5776	83.8277	90.3036	89.2303	85.0471	83.2392	83.2188	83.2298	86.1973
			1470	91.0312	86.4468	89.4529	84.1011	88.3043	88.2052	88.3405	88.0533	85.3684	88.0153	88.4582	91.418	83.5066	90.1699	89.0797	84.7523	82.9137	82.9289	82.8891	85.9342
			1470.48	90.885	86.1837	89.3223	83.8384	88.1617	88.2364	88.2724	88.0505	85.1754	87.8536	88.2424	91.2547	83.183	90.0451	88.9394	84.4728	82.596	82.6494	82.5565	85.671
			1470.96	90.7433	85.9282	89.2043	83.5988	88.0379	88.289	88.2184	88.0717	85.0051	87.7122	88.0362	91.0976	82.8694	89.938	88.8178	84.2471	82.3021	82.3952	82.2504	85.4212
			1471.44	90.6266	85.711	89.1119	83.4169	87.9526	88.3775	88.1956	88.1296	84.8784	87.6154	87.8669	90.968	82.595	89.8638	88.7295	84.1347	82.0653	82.1959	82.0069	85.2153
			1471.93	90.5669	85.5816	89.0661	83.344	87.9346	88.512	88.2258	88.2351	84.8255	87.5963	87.777	90.8994	82.4116	89.8446	88.6955	84.1938	81.9389	82.097	81.8814	85.1031
			1472.41	90.5952	85.5911	89.0896	83.4283	88.0103	88.6885	88.3244	88.3898	84.875	87.6833	87.8092	90.9248	82.3796	89.9005	88.7353	84.4418	81.9782	82.1444	81.9291	85.1368
			1472.89	90.7199	85.7605	89.1942	83.6816	88.1866	88.8866	88.4876	88.5812	85.0367	87.8803	87.9779	91.055	82.5344	90.0368	88.8545	84.8421	82.2071	82.3568	82.1694	85.3381
			1473.37	90.9198	86.0663	89.3742	84.0709	88.4463	89.0818	88.6939	88.7906	85.2969	88.1642	88.2587	91.2699	82.8648	90.2405	89.0416	85.3381	82.6025	82.7152	82.5739	85.6836
			1473.85	91.1622	86.4666	89.6152	84.5496	88.7648	89.2618	88.9212	89.0064	85.6355	88.5067	88.6117	91.5375	83.3326	90.4935	89.281	85.8933	83.1218	83.1865	83.0967	86.1298
			1474.34	91.4254	86.9331	89.9068	85.0905	89.1275	89.4283	89.1606	89.2281	86.043	88.8934	89.01	91.8363	83.9066	90.7854	89.5652	86.4992	83.7363	83.7513	83.7095	86.6463
			1474.82	91.7036	87.4593	90.2447	85.6906	89.5311	89.5893	89.4146	89.4604	86.5204	89.3239	89.4465	92.1603	84.5729	91.1144	89.8948	87.158	84.4376	84.4069	84.4068	87.2231
			1475.3	91.9992	88.0463	90.6247	86.3535	89.9734	89.7501	89.6892	89.7049	87.0676	89.7992	89.9215	92.5103	85.3224	91.4791	90.2708	87.8636	85.2214	85.1518	85.188	87.8575
			1475.78	92.3127	88.6857	91.0349	87.0719	90.4437	89.9101	89.9846	89.9565	87.6711	90.3101	90.4298	92.8826	86.1343	91.8705	90.6853	88.5909	86.0693	85.9682	86.0371	88.5371
			1476.27	92.6367	89.351	91.4537	87.8178	90.9193	90.0638	90.292	90.2032	88.2995	90.833	90.9525	93.2641	86.9683	92.2695	91.1185	89.3007	86.9404	86.8156	86.9145	89.2331
			1476.75	92.9567	90.0022	91.8542	88.5488	91.3717	90.2045	90.5952	90.4312	88.9113	91.3356	91.4614	93.6343	87.7728	92.6515	91.5438	89.9553	87.7809	87.6396	87.7652	89.9052
			1477.23	93.2568	90.6002	92.2151	89.2243	91.7775	90.3285	90.8772	90.6309	89.4707	91.7905	91.9292	93.9731	88.5038	92.9964	91.9377	90.5332	88.5444	88.3929	88.5409	90.5178
			1477.71	93.5265	91.1228	92.5274	89.822	92.1277	90.4375	91.1271	90.8009	89.9602	92.1853	92.3409	94.2692	89.1409	93.2959	92.2893	91.0348	89.2094	89.0526	89.2173	91.0533
			1478.19	93.7639	91.5689	92.7961	90.3421	92.4286	90.537	91.3426	90.9469	90.3834	92.5248	92.6973	94.5229	89.6902	93.5546	92.6018	91.4764	89.7827	89.6235	89.7991	91.5161
			1478.67	93.9739	91.9542	93.035	90.8021	92.6959	90.6342	91.5289	91.0785	90.7583	92.8247	93.0109	94.7433	90.1759	93.7855	92.8885	91.8816	90.29	90.1298	90.3117	91.926
			1479.16	94.1652	92.3019	93.2604	91.2267	92.9479	90.7348	91.6944	91.2048	91.1076	93.1044	93.299	94.9433	90.6276	94.0041	93.1656	92.2717	90.7631	90.6011	90.7875	92.3079
			1479.64	94.3468	92.6346	93.4855	91.638	93.1995	90.8423	91.8488	91.3327	91.4505	93.3798	93.5777	95.1355	91.0702	94.223	93.4467	92.66	91.229	91.0625	91.2547	92.6839
			1480.12	94.5247	92.9675	93.7178	92.0492	93.4583	90.9563	91.9997	91.4648	91.7979	93.6592	93.8567	95.3287	91.5173	94.4487	93.7385	93.0487	91.7027	91.5264	91.73	93.0667
			1480.6	94.7009	93.3055	93.9569	92.4613	93.7231	91.0731	92.1517	91.5999	92.1502	93.9417	94.1376	95.5259	91.9684	94.68	94.0386	93.4289	92.1839	91.9911	92.2146	93.4563
			1481.09	94.8727	93.6422	94.195	92.8636	93.9853	91.1862	92.305	91.7332	92.4988	94.2186	94.4134	95.7239	92.4108	94.9089	94.3364	93.7863	92.6589	92.4423	92.6951	93.8414
			1481.57	95.0346	93.9637	94.4208	93.2396	94.233	91.2884	92.4563	91.8588	92.8311	94.4774	94.6724	95.9153	92.8264	95.1239	94.6177	94.1079	93.1078	92.8617	93.1512	94.2044
			1482.05	95.1807	94.2557	94.6247	93.5751	94.4571	91.3748	92.5998	91.972	93.1371	94.7087	94.9041	96.0923	93.2012	95.3163	94.8717	94.3881	93.5145	93.236	93.5652	94.53
			1482.53	95.3079	94.5097	94.8022	93.8644	94.6547	91.4435	92.7299	92.0706	93.4131	94.9094	95.1033	96.2495	93.5305	95.4826	95.0947	94.6286	93.8734	93.5631	93.9297	94.8117
			1483.02	95.4164	94.7248	94.9548	94.1109	94.829	91.4959	92.843	92.1555	93.662	95.0826	95.2709	96.3861	93.8193	95.6256	95.2904	94.8358	94.189	93.8501	94.2482	95.052
			1483.5	95.5088	94.9057	95.0872	94.3228	94.986	91.5353	92.9375	92.229	93.8892	95.2346	95.4118	96.5036	94.0767	95.7512	95.4666	95.0164	94.4705	94.1077	94.5296	95.2585
			1483.98	95.588	95.0592	95.2053	94.5091	95.1309	91.5656	93.014	92.2939	94.0997	95.3714	95.5314	96.6044	94.3114	95.8655	95.6309	95.1756	94.7275	94.345	94.7838	95.4401
			1484.46	95.6568	95.1918	95.314	94.6767	95.2667	91.5908	93.074	92.3529	94.2968	95.4978	95.6343	96.6907	94.5294	95.973	95.7891	95.317	94.9665	94.5677	95.0178	95.6034
			1484.94	95.7164	95.3085	95.4171	94.8296	95.3935	91.6155	93.1197	92.4089	94.4823	95.6168	95.7236	96.763	94.734	96.0766	95.9444	95.443	95.1915	94.7781	95.2362	95.7528
			1485.42	95.7668	95.4127	95.5179	94.9695	95.5096	91.6436	93.1537	92.4643	94.6575	95.7309	95.8013	96.8216	94.9274	96.1774	96.0978	95.5564	95.4051	94.9776	95.442	95.8908
			1485.91	95.8064	95.5067	95.619	95.097	95.6132	91.6788	93.1782	92.5214	94.8244	95.8428	95.869	96.8659	95.1123	96.2758	96.2495	95.6601	95.6098	95.1685	95.6377	96.019
			1486.39	95.8328	95.5916	95.7227	95.2115	95.7034	91.723	93.1943	92.5815	94.9863	95.9553	95.928	96.8961	95.2924	96.3717	96.3988	95.7572	95.809	95.3547	95.8264	96.1385
			1486.87	95.8433	95.6671	95.8302	95.3129	95.7815	91.7759	93.2023	92.6444	95.1465	96.071	95.9794	96.9132	95.4719	96.465	96.5447	95.8504	96.0057	95.5415	96.0107	96.2503
			1487.35	95.8366	95.732	95.9406	95.4011	95.8511	91.8347	93.2019	92.7087	95.3066	96.1908	96.0241	96.9199	95.6538	96.5553	96.6861	95.9411	96.2016	95.7326	96.1917	96.3547
			1487.84	95.8141	95.7861	96.0509	95.4778	95.9168	91.8949	93.1939	92.7719	95.4653	96.3133	96.0631	96.9207	95.8384	96.6422	96.8214	96.0309	96.3948	95.9282	96.368	96.4517
			1488.32	95.7826	95.8326	96.1553	95.5477	95.9832	91.951	93.1827	92.8305	95.6174	96.4336	96.0992	96.9229	96.0214	96.7242	96.948	96.1226	96.5802	96.1226	96.5355	96.5421
			1488.8	95.7549	95.8806	96.2463	95.6202	96.0525	91.9976	93.1786	92.8809	95.7548	96.5441	96.1386	96.9365	96.1942	96.7994	97.0622	96.2212	96.7498	96.3045	96.6889	96.6287
			1489.28	95.7477	95.9448	96.3166	95.7074	96.1232	92.029	93.1954	92.9191	95.8696	96.6367	96.1904	96.972	96.3459	96.865	97.1597	96.331	96.8966	96.4605	96.8244	96.7162
			1489.76	95.7743	96.0386	96.3624	95.8186	96.19	92.0404	93.244	92.9413	95.9577	96.7055	96.2622	97.0349	96.4673	96.9186	97.2369	96.4514	97.0169	96.5807	96.942	96.8089
			1490.25	95.8359	96.1642	96.3862	95.9523	96.2459	92.0293	93.3234	92.9454	96.021	96.7498	96.3543	97.1205	96.5556	96.9592	97.2927	96.5752	97.1129	96.6643	97.0446	96.9063
			1490.73	95.9195	96.3091	96.3949	96.0951	96.2864	91.9972	93.4198	92.9322	96.0655	96.7744	96.4571	97.2155	96.615	96.9881	97.3293	96.6913	97.1895	96.7188	97.1356	97.002
			1491.21	96.0062	96.4532	96.396	96.2295	96.3113	91.9488	93.5142	92.905	96.0973	96.7856	96.556	97.3046	96.6534	97.0082	97.3504	96.7907	97.2514	96.7546	97.216	97.0865
			1491.69	96.0809	96.5791	96.3944	96.342	96.3233	91.8904	93.5921	92.8685	96.1199	96.7886	96.6389	97.3772	96.6777	97.022	97.3599	96.8685	97.3008	96.7795	97.285	97.1523
			1492.17	96.1356	96.6773	96.3922	96.4265	96.3261	91.8276	93.6467	92.8267	96.1348	96.7866	96.6988	97.4294	96.6929	97.0321	97.3608	96.924	97.3388	96.7976	97.3417	97.1964
			1492.66	96.1688	96.7453	96.3898	96.4833	96.323	91.7651	93.6771	92.7832	96.1431	96.7815	96.7342	97.4616	96.7028	97.0401	97.356	96.9593	97.3665	96.8112	97.3866	97.2194
			1493.14	96.1821	96.7853	96.3873	96.5161	96.3165	91.7067	93.6855	92.7405	96.1466	96.7751	96.7465	97.4763	96.7107	97.0476	97.3481	96.9785	97.3864	96.8226	97.4222	97.225
			1493.62	96.1789	96.8019	96.3851	96.5305	96.3085	91.6552	93.6753	92.7005	96.148	96.7695	96.7393	97.4771	96.7207	97.0559	97.3402	96.9864	97.4023	96.8353	97.4525	97.2191
			1494.1	96.163	96.8007	96.3844	96.5325	96.3008	91.6127	93.6497	92.6643	96.1515	96.7672	96.7175	97.4674	96.7372	97.066	97.3356	96.9882	97.4192	96.854	97.483	97.2086
			1494.59	96.139	96.7879	96.3867	96.5289	96.2946	91.5799	93.6122	92.6324	96.1613	96.7708	96.6872	97.4511	96.7649	97.0781	97.3378	96.9891	97.442	96.8842	97.5191	97.2008
			1495.07	96.1122	96.7701	96.3936	96.5257	96.2906	91.556	93.5667	92.6045	96.1803	96.7823	96.6556	97.4318	96.8065	97.0917	97.3491	96.993	97.4743	96.9298	97.5646	97.2029
			1495.55	96.0891	96.7539	96.4063	96.5279	96.289	91.5381	93.5183	92.5796	96.2087	96.8015	96.6302	97.413	96.8607	97.1045	97.3694	97.0023	97.5157	96.9906	97.6193	97.2194
			1496.03	96.0759	96.7448	96.4248	96.5384	96.2891	91.5212	93.4739	92.5566	96.2421	96.8255	96.6174	97.398	96.9215	97.1135	97.3954	97.0171	97.5612	97.0598	97.678	97.2509
			1496.51	96.0774	96.7467	96.4472	96.5573	96.2902	91.5	93.4403	92.5351	96.2731	96.8494	96.6205	97.3889	96.9788	97.1167	97.4216	97.0373	97.6029	97.1251	97.732	97.2929
			1497	96.0944	96.7609	96.471	96.5835	96.2925	91.471	93.4228	92.5155	96.2954	96.8691	96.6388	97.3871	97.0239	97.1146	97.4428	97.0637	97.6346	97.1745	97.7744	97.339
			1497.48	96.1238	96.7869	96.4941	96.6157	96.297	91.4341	93.4226	92.4983	96.3078	96.8834	96.669	97.393	97.0548	97.1113	97.4576	97.0984	97.6569	97.2037	97.8051	97.385
			1497.96	96.1604	96.8236	96.5153	96.6543	96.3055	91.391	93.4368	92.4833	96.3146	96.8945	96.7078	97.4068	97.0757	97.1119	97.4688	97.1428	97.6763	97.2174	97.83	97.4308
			1498.44	96.199	96.8688	96.5344	96.7	96.3187	91.3436	93.4606	92.4684	96.3215	96.9052	96.7529	97.4283	97.0935	97.1194	97.4803	97.1959	97.7003	97.2256	97.8568	97.4785
			1498.92	96.2362	96.9195	96.5503	96.7517	96.3351	91.2922	93.4888	92.4502	96.3314	96.9166	96.8023	97.4565	97.1117	97.1331	97.4938	97.253	97.7323	97.2365	97.8893	97.5291
			1499.41	96.2695	96.9714	96.5614	96.8063	96.3517	91.2361	93.5168	92.4253	96.3426	96.9274	96.8532	97.4893	97.1298	97.1494	97.5083	97.3074	97.7702	97.2534	97.9262	97.5801
			1499.89	96.2973	97.019	96.5654	96.8584	96.3643	91.1743	93.5406	92.3914	96.3508	96.9347	96.9013	97.523	97.1438	97.1628	97.5204	97.352	97.8081	97.2747	97.9622	97.6268
			1500.37	96.3184	97.0576	96.5607	96.9026	96.3697	91.1066	93.5575	92.3484	96.3512	96.9357	96.9417	97.5535	97.15	97.1689	97.527	97.3823	97.8397	97.2965	97.9922	97.6638
			1500.85	96.3323	97.084	96.5468	96.9352	96.3662	91.0339	93.5656	92.2983	96.342	96.9297	96.9703	97.5773	97.147	97.1651	97.5266	97.397	97.8614	97.3156	98.0135	97.6882
			1501.34	96.3388	97.0975	96.5255	96.9555	96.3549	90.958	93.5637	92.2446	96.325	96.9181	96.985	97.5922	97.1371	97.1519	97.5203	97.3982	97.8739	97.3311	98.0277	97.7003
			1501.82	96.3379	97.0994	96.4996	96.9649	96.3383	90.8807	93.5517	92.1908	96.3051	96.9043	96.9857	97.5971	97.1251	97.1317	97.5112	97.3891	97.8811	97.345	98.0391	97.7031
			1502.3	96.3296	97.0916	96.4727	96.9667	96.3202	90.8037	93.5294	92.1403	96.2889	96.8919	96.9738	97.5923	97.1165	97.1081	97.5029	97.373	97.8883	97.3603	98.0534	97.7012
			1502.78	96.3133	97.0755	96.4485	96.9635	96.3042	90.7282	93.4966	92.0952	96.2824	96.8845	96.951	97.5781	97.1159	97.0845	97.4984	97.351	97.9002	97.3803	98.0756	97.698
			1503.26	96.2871	97.05	96.4296	96.9569	96.2926	90.655	93.4525	92.0568	96.2897	96.8838	96.9176	97.5537	97.1253	97.0631	97.4988	97.3211	97.919	97.4065	98.1082	97.6951
			1503.75	96.2474	97.0113	96.4177	96.9457	96.2864	90.5845	93.3947	92.0258	96.3128	96.8905	96.8713	97.517	97.1434	97.0448	97.5032	97.2774	97.9442	97.4386	98.1516	97.6909
			1504.23	96.1873	96.9514	96.4132	96.9257	96.2847	90.5178	93.3183	92.0025	96.3513	96.9036	96.8064	97.4628	97.166	97.0291	97.5088	97.2098	97.9728	97.4741	98.2039	97.6803
			1504.71	96.0966	96.8581	96.4152	96.8894	96.2849	90.4559	93.2154	91.9869	96.4026	96.9208	96.7131	97.3829	97.1856	97.0143	97.5113	97.1058	97.9993	97.5082	98.262	97.655
			1505.19	95.9617	96.7164	96.421	96.8267	96.2827	90.4002	93.0748	91.9778	96.4616	96.9375	96.5786	97.2662	97.1916	96.9982	97.5059	96.9573	98.0177	97.5345	98.3225	97.6047
			1505.67	95.772	96.5169	96.4251	96.7293	96.2729	90.3505	92.8869	91.9706	96.5189	96.946	96.3947	97.1053	97.1726	96.9795	97.4895	96.7799	98.0228	97.5462	98.3812	97.5217
			1506.16	95.5408	96.2798	96.4195	96.6044	96.2531	90.3022	92.6616	91.9519	96.5582	96.9343	96.1787	96.9133	97.1232	96.9599	97.4651	96.6355	98.0152	97.5384	98.4324	97.4142
			1506.64	95.3342	96.0836	96.3975	96.4927	96.229	90.2427	92.4541	91.9	96.5594	96.8906	95.9998	96.7481	97.0577	96.9457	97.4448	96.6045	98.0053	97.5152	98.4657	97.3221
			1507.12	95.2489	96.031	96.3633	96.4528	96.2146	90.1591	92.3488	91.8024	96.5163	96.8187	95.9496	96.6896	97.012	96.9432	97.4414	96.6971	98.0073	97.4907	98.4707	97.2992
			1507.6	95.312	96.1375	96.3314	96.4987	96.2167	90.0541	92.3742	91.6751	96.4483	96.7408	96.0423	96.7551	97.009	96.95	97.4515	96.8465	98.022	97.4755	98.4473	97.3548
			1508.09	95.4575	96.32	96.3116	96.5867	96.2276	89.9429	92.4765	91.5457	96.3795	96.6755	96.2033	96.885	97.0367	96.9576	97.4592	96.9897	98.0376	97.4668	98.4072	97.4465
			1508.57	95.6128	96.4992	96.304	96.6717	96.2362	89.8367	92.5923	91.4283	96.3193	96.6272	96.3601	97.0177	97.0725	96.9613	97.455	97.1031	98.0454	97.458	98.3627	97.5337
			1509.05	95.7438	96.6434	96.3052	96.7344	96.2377	89.7389	92.6897	91.3236	96.2673	96.5935	96.4826	97.1265	97.1045	96.9618	97.4393	97.1874	98.0463	97.447	98.3232	97.6017
			1509.53	95.8443	96.7518	96.3131	96.7734	96.2324	89.6486	92.7602	91.2287	96.2216	96.5724	96.568	97.2072	97.1312	96.9626	97.4178	97.2513	98.0462	97.4365	98.2953	97.6517
			1510.01	95.9183	96.8333	96.3271	96.7948	96.2241	89.564	92.8051	91.1412	96.1825	96.5632	96.6233	97.2645	97.1558	96.9675	97.3975	97.3037	98.0519	97.4314	98.2843	97.6904
			1510.5	95.9719	96.8976	96.3473	96.8058	96.2177	89.4834	92.8286	91.0603	96.1511	96.5656	96.6566	97.3039	97.1817	96.9793	97.3839	97.3504	98.0687	97.4356	98.2926	97.7237
			1510.98	96.0104	96.9514	96.3731	96.8125	96.2176	89.4056	92.8351	90.9866	96.1285	96.5778	96.6748	97.33	97.2103	96.9988	97.3805	97.3936	98.0985	97.4509	98.3191	97.7549
			1511.46	96.0375	96.9977	96.4026	96.8192	96.2265	89.3301	92.8292	90.9211	96.1148	96.5966	96.6829	97.3456	97.2406	97.0246	97.3869	97.4323	98.1392	97.4755	98.3585	97.7844
			1511.94	96.0554	97.0364	96.4324	96.8276	96.2446	89.2568	92.8147	90.8642	96.1083	96.6171	96.684	97.3527	97.2691	97.053	97.4002	97.4638	98.1856	97.5049	98.4022	97.8103
			1512.42	96.0653	97.0659	96.4588	96.8376	96.2692	89.1864	92.7947	90.8154	96.1064	96.6349	96.68	97.3523	97.2923	97.08	97.4154	97.4855	98.2317	97.5336	98.442	97.8306
			1512.91	96.0682	97.084	96.4792	96.8477	96.2965	89.1193	92.7707	90.7731	96.1072	96.6474	96.6718	97.3455	97.3084	97.1023	97.4284	97.4967	98.2732	97.5582	98.4726	97.8443
			1513.39	96.0648	97.09	96.4925	96.8569	96.323	89.0563	92.7428	90.7353	96.1097	96.6546	96.6598	97.3338	97.3185	97.1192	97.4373	97.4987	98.3091	97.5779	98.493	97.8527
			1513.87	96.0562	97.0843	96.4999	96.8651	96.3462	88.9981	92.71	90.6998	96.1148	96.6587	96.6447	97.3191	97.3261	97.1316	97.4427	97.4945	98.3412	97.5953	98.5066	97.8587
			1514.35	96.044	97.0686	96.5035	96.8728	96.365	88.9446	92.6711	90.6646	96.1237	96.6629	96.627	97.3039	97.3358	97.1422	97.4468	97.4876	98.3727	97.6147	98.5183	97.8658
			1514.84	96.0295	97.0447	96.5058	96.8811	96.3788	88.8952	92.6252	90.6279	96.1373	96.6694	96.6067	97.2906	97.3512	97.1533	97.4523	97.4814	98.4053	97.6397	98.5323	97.8763
			1515.32	96.014	97.0151	96.508	96.8905	96.3857	88.8471	92.5728	90.5873	96.1537	96.6779	96.5832	97.2818	97.3725	97.1655	97.4605	97.4784	98.4371	97.6708	98.5496	97.8902
			1515.8	95.9978	96.9829	96.5088	96.8995	96.382	88.7952	92.5169	90.54	96.1672	96.6843	96.5556	97.2785	97.3947	97.1768	97.4698	97.4784	98.4614	97.7028	98.5669	97.9039
			1516.28	95.98	96.952	96.5038	96.905	96.3626	88.7318	92.463	90.4834	96.1686	96.6806	96.5231	97.2798	97.4077	97.182	97.4756	97.4792	98.4681	97.725	98.5768	97.9113
			1516.76	95.9589	96.9267	96.488	96.9025	96.3247	88.6504	92.4169	90.4164	96.1502	96.6595	96.4867	97.2816	97.4008	97.1761	97.4727	97.4773	98.4504	97.7258	98.573	97.9075
			1517.24	95.9327	96.9096	96.4588	96.8897	96.2707	88.5492	92.3809	90.3412	96.1112	96.6195	96.4487	97.2785	97.3708	97.1577	97.4594	97.4701	98.4113	97.7007	98.5557	97.8924
			1517.73	95.9005	96.9007	96.4192	96.8673	96.2088	88.4331	92.3517	90.2618	96.0592	96.566	96.4122	97.2665	97.324	97.1306	97.4388	97.4563	98.3629	97.6559	98.5324	97.8714
			1518.21	95.8624	96.8971	96.3747	96.8378	96.148	88.3096	92.3232	90.1818	96.0046	96.5074	96.3784	97.2439	97.2712	97.1005	97.4166	97.4358	98.3191	97.6029	98.5123	97.8516
			1518.69	95.8186	96.895	96.3309	96.8032	96.094	88.1859	92.2891	90.1033	95.9553	96.4499	96.347	97.2114	97.2212	97.0716	97.397	97.4081	98.2885	97.5515	98.5015	97.8377
			1519.17	95.7692	96.8909	96.2912	96.7636	96.0492	88.0675	92.2457	90.0266	95.9142	96.3956	96.3162	97.1701	97.1777	97.0443	97.3809	97.3732	98.2733	97.5063	98.5003	97.8311
			1519.66	95.7142	96.8822	96.257	96.7182	96.0127	87.96	92.1922	89.9518	95.8814	96.3438	96.2848	97.1219	97.1395	97.0156	97.366	97.3332	98.2706	97.4671	98.5045	97.8303
			1520.14	95.6558	96.868	96.2279	96.6671	95.9815	87.8703	92.1325	89.8799	95.8548	96.293	96.2531	97.0708	97.103	96.9801	97.3475	97.2959	98.2741	97.4316	98.5066	97.8331
			1520.62	95.6004	96.8512	96.2032	96.6154	95.9511	87.8065	92.0766	89.8138	95.8334	96.2438	96.2257	97.0246	97.0654	96.9334	97.3211	97.2748	98.2759	97.3978	98.4994	97.8377
			1521.1	95.5601	96.8389	96.1824	96.5752	95.9179	87.7728	92.0393	89.7583	95.8176	96.2016	96.2115	96.9952	97.0289	96.877	97.2867	97.284	98.2701	97.3678	98.481	97.8442
			1521.58	95.547	96.8401	96.166	96.5618	95.8819	87.7613	92.0315	89.7163	95.81	96.1743	96.219	96.9915	97.0022	96.8231	97.253	97.3245	98.2573	97.3486	98.4601	97.8547
			1522.07	95.5632	96.8575	96.1556	96.5804	95.8476	87.7525	92.05	89.6858	95.8112	96.1657	96.2478	97.0108	96.9949	96.7873	97.2321	97.3829	98.2442	97.3467	98.451	97.8701
			1522.55	95.5987	96.8849	96.1517	96.6213	95.8201	87.7288	92.0789	89.6603	95.8182	96.1711	96.2886	97.0405	97.0086	96.7768	97.2302	97.4413	98.2376	97.3618	98.4614	97.8877
			1523.03	95.6401	96.9124	96.1528	96.668	95.8011	87.6842	92.1028	89.6333	95.8251	96.1812	96.3296	97.0678	97.0365	96.7871	97.244	97.4876	98.2388	97.3877	98.4872	97.9023
			1523.51	95.6782	96.9322	96.1563	96.7068	95.7889	87.6219	92.114	89.6013	95.8265	96.1877	96.3637	97.0869	97.0693	96.8084	97.265	97.516	98.2448	97.4166	98.5185	97.9094
			1523.99	95.7084	96.941	96.1584	96.7302	95.7802	87.5487	92.1112	89.5623	95.8189	96.1861	96.3884	97.0981	97.0991	96.831	97.285	97.5258	98.2516	97.4425	98.545	97.9065
			1524.48	95.7293	96.939	96.1546	96.7354	95.7713	87.4711	92.0973	89.5155	95.801	96.1746	96.4045	97.1058	97.1203	96.8474	97.2972	97.5197	98.2569	97.4621	98.5594	97.8948
			1524.96	95.741	96.9304	96.1405	96.7243	95.7593	87.3948	92.0764	89.4601	95.7752	96.1549	96.415	97.1161	97.1303	96.8532	97.2977	97.5038	98.2612	97.4741	98.5584	97.879
			1525.44	95.7451	96.9219	96.113	96.703	95.7427	87.324	92.054	89.3957	95.7469	96.1306	96.4243	97.1355	97.1296	96.8466	97.2858	97.4866	98.2668	97.4797	98.5436	97.867
			1525.92	95.7449	96.9218	96.0716	96.681	95.7214	87.2615	92.0351	89.3231	95.7231	96.1064	96.437	97.1672	97.1216	96.8294	97.2643	97.4758	98.2766	97.481	98.5209	97.8669
			1526.41	95.7446	96.936	96.0199	96.6677	95.6969	87.2071	92.0234	89.2449	95.7091	96.0857	96.4556	97.2095	97.1105	96.8057	97.2382	97.4758	98.2917	97.48	98.4984	97.8829
			1526.89	95.748	96.9655	95.9641	96.6681	95.671	87.1582	92.0198	89.1648	95.7054	96.0689	96.4792	97.2555	97.099	96.7801	97.2123	97.4857	98.3096	97.4768	98.4816	97.9118
			1527.37	95.7567	97.0053	95.9105	96.6804	95.6445	87.1107	92.0222	89.0868	95.7069	96.0533	96.5038	97.2957	97.0868	96.7554	97.1892	97.5008	98.3257	97.4695	98.4724	97.9446
			1527.85	95.7695	97.0478	95.8632	96.6982	95.617	87.0605	92.0267	89.014	95.7063	96.0357	96.524	97.3222	97.0713	96.7327	97.1691	97.5163	98.336	97.4562	98.4692	97.9712
			1528.33	95.7832	97.0859	95.8239	96.7139	95.5879	87.0045	92.0291	88.9486	95.6983	96.0144	96.5357	97.3313	97.0501	96.7119	97.1509	97.5284	98.3391	97.4368	98.4699	97.985
			1528.82	95.7939	97.1149	95.7922	96.722	95.5567	86.9412	92.0262	88.8912	95.6816	95.9905	96.5368	97.3236	97.0228	96.6933	97.1345	97.5353	98.3372	97.4138	98.4738	97.9856
			1529.3	95.7983	97.1334	95.767	96.7204	95.5242	86.8702	92.0155	88.8419	95.6591	95.9672	96.5272	97.3027	96.9917	96.6783	97.1209	97.5366	98.3347	97.3918	98.482	97.977
			1529.78	95.794	97.1418	95.7473	96.7096	95.4917	86.7925	91.996	88.7996	95.6358	95.9477	96.5079	97.2735	96.96	96.6689	97.1119	97.5317	98.3355	97.3755	98.4963	97.9656
			1530.26	95.7801	97.1412	95.7316	96.691	95.4605	86.7093	91.967	88.7632	95.6163	95.9341	96.4796	97.24	96.931	96.6664	97.109	97.5197	98.3417	97.3685	98.5173	97.957
			1530.74	95.756	97.1322	95.7184	96.6655	95.4306	86.6229	91.9282	88.7311	95.6038	95.9259	96.4418	97.205	96.9063	96.6711	97.1124	97.4988	98.3527	97.3718	98.5434	97.9546
			1531.23	95.7214	97.1145	95.7053	96.6328	95.401	86.5357	91.8789	88.702	95.5984	95.9197	96.3929	97.1697	96.8852	96.6815	97.1209	97.4678	98.3649	97.3834	98.5706	97.9592
			1531.71	95.6762	97.087	95.689	96.5912	95.3684	86.4514	91.8185	88.6746	95.5975	95.9097	96.3311	97.135	96.8646	96.6937	97.1314	97.428	98.3726	97.3977	98.5927	97.969
			1532.19	95.6215	97.0495	95.6653	96.5395	95.3285	86.3739	91.7477	88.6473	95.5958	95.8882	96.2571	97.1025	96.8404	96.7017	97.139	97.3862	98.3698	97.4061	98.6029	97.981
			1532.67	95.5616	97.0048	95.63	96.48	95.2779	86.3067	91.6701	88.6177	95.5869	95.8491	96.1782	97.0756	96.8092	96.6986	97.1384	97.3551	98.353	97.3983	98.5962	97.9915
			1533.15	95.5049	96.96	95.5825	96.4211	95.2176	86.2498	91.5938	88.5827	95.5666	95.793	96.1093	97.0591	96.7715	96.68	97.1265	97.3471	98.3252	97.3669	98.5752	97.9985
			1533.64	95.4608	96.9242	95.5274	96.3743	95.1548	86.1975	91.5286	88.5397	95.5367	95.7299	96.0672	97.0554	96.733	96.6488	97.1053	97.3638	98.296	97.3137	98.5504	98.0019
			1534.12	95.4327	96.9012	95.4728	96.346	95.0993	86.1408	91.4793	88.4884	95.5043	95.674	96.0569	97.0605	96.7005	96.6132	97.0814	97.3942	98.2751	97.2497	98.5339	98.0028
			1534.6	95.4161	96.8863	95.4243	96.332	95.0559	86.0735	91.4425	88.4306	95.4761	95.6334	96.0681	97.0658	96.6764	96.5809	97.0603	97.424	98.2647	97.1862	98.5304	98.0013
			1535.08	95.4021	96.8705	95.3824	96.322	95.0232	85.9948	91.4101	88.3691	95.4543	95.6075	96.0839	97.0629	96.6575	96.554	97.0437	97.4422	98.26	97.1283	98.5363	97.996
			1535.57	95.3821	96.8451	95.344	96.3053	94.9962	85.9079	91.3743	88.3061	95.4375	95.591	96.0897	97.046	96.6388	96.5297	97.0304	97.4427	98.2546	97.0749	98.5451	97.9846
			1536.05	95.35	96.8035	95.3055	96.2744	94.9703	85.817	91.3291	88.2431	95.4238	95.5792	96.0764	97.0115	96.6161	96.504	97.0189	97.4225	98.2448	97.0233	98.552	97.9649
			1536.53	95.3007	96.7409	95.2641	96.2242	94.9423	85.7268	91.2696	88.1817	95.4121	95.5704	96.0379	96.9569	96.5875	96.4733	97.0089	97.3798	98.2302	96.9717	98.556	97.9358
			1537.01	95.229	96.6528	95.2184	96.1515	94.9115	85.6424	91.1902	88.1243	95.4034	95.5662	95.9702	96.8794	96.5535	96.4363	97.0029	97.3119	98.2147	96.921	98.5602	97.8965
			1537.49	95.1293	96.5338	95.1684	96.0542	94.8798	85.5704	91.084	88.0746	95.4008	95.5729	95.8693	96.7762	96.5179	96.3944	97.0063	97.2154	98.2068	96.8761	98.572	97.8466
			1537.98	94.995	96.3782	95.1168	95.9318	94.8526	85.5207	90.9419	88.0381	95.4091	95.6009	95.732	96.6454	96.4877	96.3537	97.0284	97.0857	98.2186	96.8461	98.6023	97.785
			1538.46	94.8217	96.1814	95.0686	95.7857	94.8392	85.5071	90.7548	88.0228	95.4324	95.6641	95.5585	96.4886	96.4729	96.3258	97.0812	96.9223	98.2646	96.8445	98.6637	97.7093
			1538.94	94.6143	95.9488	95.0323	95.6238	94.8517	85.5463	90.5213	88.0371	95.4696	95.7745	95.3596	96.3186	96.4843	96.327	97.1735	96.7403	98.3541	96.8859	98.7623	97.6158
			1539.42	94.3999	95.7113	95.0167	95.4653	94.8979	85.6483	90.2647	88.0843	95.5063	95.9275	95.1684	96.1674	96.5242	96.3705	97.2975	96.583	98.4769	96.9746	98.8836	97.5046
			1539.9	94.2335	95.5339	95.0242	95.342	94.9686	85.7961	90.0454	88.1513	95.5146	96.0858	95.0408	96.0841	96.5771	96.4488	97.415	96.5073	98.5924	97.0895	98.9845	97.3911
			1540.39	94.1689	95.4845	95.0438	95.2829	95.0323	85.9376	89.934	88.2079	95.4736	96.19	95.0235	96.1017	96.6125	96.5248	97.4719	96.5384	98.6501	97.1866	99.018	97.3091
			1540.87	94.2105	95.5739	95.0579	95.2902	95.0588	86.0194	89.9505	88.2278	95.3935	96.208	95.1101	96.2032	96.6103	96.5589	97.4449	96.6517	98.6371	97.2334	98.9802	97.2895
			1541.35	94.3149	95.7513	95.0565	95.3413	95.0419	86.027	90.0528	88.2083	95.3064	96.1576	95.2508	96.3378	96.5764	96.5416	97.3575	96.8025	98.5846	97.2333	98.911	97.336
			1541.83	94.4351	95.9556	95.0396	95.4103	94.9936	85.9801	90.1847	88.1624	95.2361	96.0753	95.3984	96.4643	96.5264	96.4879	97.2479	96.9552	98.529	97.2077	98.8497	97.4298
			1542.32	94.5455	96.1477	95.0101	95.4797	94.9253	85.9065	90.3111	88.1047	95.1886	95.9861	95.5283	96.5648	96.4695	96.416	97.1401	97.0881	98.4861	97.1733	98.8114	97.5464
			1542.8	94.6384	96.31	94.9697	95.5392	94.8416	85.8293	90.4189	88.0457	95.1583	95.8993	95.6327	96.6366	96.4059	96.3364	97.043	97.1898	98.4534	97.1368	98.7915	97.6646
			1543.28	94.7144	96.4368	94.9183	95.5829	94.7424	85.7659	90.507	87.9927	95.1363	95.8157	95.7116	96.6833	96.3317	96.2531	96.9579	97.2569	98.421	97.0996	98.7764	97.7679
			1543.76	94.7766	96.5286	94.8565	95.6081	94.6278	85.7283	90.5791	87.9515	95.1154	95.7348	95.7682	96.7114	96.2456	96.1685	96.8854	97.2932	98.3807	97.063	98.754	97.8451
			1544.24	94.8276	96.5906	94.788	95.6164	94.5033	85.7214	90.6392	87.9255	95.0933	95.6591	95.8071	96.7283	96.1523	96.0867	96.828	97.3089	98.3317	97.031	98.7185	97.8916
			1544.73	94.8693	96.6312	94.7189	95.6142	94.3796	85.7401	90.6898	87.9143	95.0719	95.5936	95.834	96.7414	96.0625	96.0141	96.7896	97.3156	98.2809	97.0096	98.6739	97.9111
			1545.21	94.9019	96.6593	94.6554	95.6091	94.2692	85.7717	90.731	87.9135	95.0555	95.5433	95.8532	96.7553	95.9872	95.9567	96.7716	97.3222	98.2384	97.0023	98.6299	97.9129
			1545.69	94.9249	96.6808	94.6012	95.6067	94.1801	85.8019	90.7621	87.9167	95.0469	95.5095	95.8668	96.7708	95.932	95.9169	96.7712	97.3314	98.2109	97.0085	98.5955	97.9073
			1546.17	94.9377	96.6982	94.5561	95.6084	94.1137	85.822	90.7822	87.9189	95.0462	95.4898	95.8744	96.7862	95.8952	95.8925	96.7826	97.3416	98.1989	97.0234	98.5744	97.901
			1546.65	94.9398	96.7108	94.5173	95.6124	94.0666	85.8303	90.7914	87.9184	95.0511	95.4799	95.8742	96.7983	95.8702	95.879	96.7992	97.3498	98.198	97.041	98.5655	97.8962
			1547.14	94.9312	96.7172	94.4819	95.6152	94.0332	85.8317	90.791	87.9164	95.059	95.4764	95.8648	96.8047	95.8493	95.8712	96.8155	97.3533	98.2021	97.0568	98.5648	97.8928
			1547.62	94.9123	96.7165	94.4479	95.6138	94.009	85.8352	90.7829	87.9169	95.0678	95.4777	95.8458	96.8041	95.8264	95.8649	96.8283	97.3519	98.207	97.0682	98.5681	97.8901
			1548.1	94.8846	96.71	94.4151	95.6063	93.991	85.8515	90.7696	87.9256	95.0769	95.4848	95.8196	96.797	95.7982	95.8578	96.8363	97.3478	98.2108	97.0756	98.5731	97.8879
			1548.58	94.8512	96.7008	94.3855	95.5926	93.9782	85.89	90.7545	87.9473	95.0868	95.5005	95.7918	96.786	95.7653	95.8496	96.8404	97.3451	98.2153	97.0816	98.5792	97.8877
			1549.07	94.8168	96.6931	94.3619	95.5741	93.9705	85.9546	90.741	87.9843	95.0981	95.5275	95.7706	96.7747	95.7313	95.8416	96.8425	97.3473	98.224	97.0894	98.5875	97.8913
			1549.55	94.7868	96.6902	94.3461	95.5529	93.9674	86.0391	90.7315	88.0325	95.1107	95.5652	95.7635	96.7669	95.7008	95.8358	96.8447	97.3546	98.2397	97.1007	98.5983	97.8986
			1550.03	94.7644	96.6916	94.3361	95.5299	93.9667	86.1277	90.726	88.0825	95.1222	95.6082	95.7729	96.764	95.6764	95.833	96.847	97.3621	98.2608	97.1133	98.6097	97.9063
			1550.51	94.749	96.6922	94.327	95.504	93.9649	86.2028	90.7226	88.1235	95.1291	95.6476	95.7939	96.764	95.656	95.8316	96.8476	97.3629	98.2809	97.1217	98.6171	97.9087
			1550.99	94.736	96.6858	94.3125	95.4726	93.9585	86.2542	90.7184	88.1496	95.1285	95.676	95.8163	96.7631	95.6343	95.8287	96.8435	97.3513	98.2916	97.1205	98.6156	97.9002
			1551.48	94.72	96.6679	94.2886	95.4336	93.9464	86.283	90.7116	88.1621	95.12	95.6906	95.8305	96.7577	95.6061	95.8215	96.833	97.3253	98.2869	97.1077	98.6026	97.8785
			1551.96	94.6968	96.6385	94.2552	95.387	93.9295	86.2983	90.7021	88.1677	95.106	95.6937	95.8308	96.7465	95.5695	95.8089	96.8165	97.2868	98.2657	97.0859	98.5792	97.8457
			1552.44	94.6646	96.6013	94.2155	95.3353	93.9107	86.3122	90.6908	88.1754	95.0911	95.6917	95.8162	96.7306	95.5267	95.7923	96.7972	97.2409	98.2319	97.0614	98.5499	97.8075
			1552.92	94.6238	96.5628	94.1756	95.2831	93.8934	86.3353	90.679	88.1934	95.0808	95.6928	95.7896	96.7122	95.4837	95.7749	96.78	97.1938	98.1933	97.0421	98.5221	97.7715
			1553.4	94.5765	96.5296	94.1422	95.2351	93.8801	86.3734	90.6666	88.2269	95.0795	95.7043	95.7558	96.6932	95.4483	95.7608	96.7703	97.1506	98.1601	97.0354	98.504	97.7452
			1553.89	94.525	96.5047	94.1206	95.1935	93.871	86.4252	90.6518	88.2751	95.0884	95.7303	95.7195	96.6736	95.4269	95.7535	96.772	97.112	98.1409	97.0436	98.5014	97.7322
			1554.37	94.4703	96.4844	94.1124	95.1554	93.8631	86.4826	90.6301	88.3319	95.1046	95.7692	95.6825	96.6499	95.4212	95.7541	96.7851	97.0737	98.1395	97.0619	98.5146	97.7296
			1554.85	94.41	96.4579	94.114	95.1126	93.8516	86.5343	90.5959	88.3876	95.1218	95.8148	95.6417	96.6155	95.4272	95.7606	96.8058	97.0272	98.153	97.0798	98.5386	97.7284
			1555.33	94.3385	96.4108	94.1197	95.0539	93.8327	86.5717	90.5435	88.4351	95.135	95.8593	95.59	96.5626	95.4378	95.7699	96.8292	96.9633	98.1748	97.0862	98.5661	97.7173
			1555.82	94.2473	96.3294	94.1249	94.9691	93.806	86.5928	90.4677	88.4722	95.1436	95.8984	95.5177	96.4844	95.4477	95.7802	96.8525	96.8737	98.1989	97.075	98.5921	97.6878
			1556.3	94.1259	96.2024	94.1289	94.8508	93.7755	86.603	90.3629	88.5036	95.1539	95.9331	95.4145	96.3751	95.4561	95.7931	96.8772	96.7518	98.2251	97.047	98.6176	97.6364
			1556.78	93.9622	96.021	94.1355	94.6941	93.7487	86.6154	90.2233	88.5396	95.1786	95.9694	95.27	96.2296	95.4672	95.8143	96.9098	96.5926	98.2592	97.0098	98.6492	97.5642
			1557.26	93.7459	95.7806	94.1515	94.4989	93.737	86.654	90.0451	88.597	95.2372	96.0165	95.0766	96.0465	95.4873	95.8524	96.9599	96.4031	98.3122	96.9765	98.697	97.4769
			1557.74	93.4827	95.4965	94.1832	94.2819	93.7536	86.7609	89.8425	88.7	95.3508	96.0827	94.8434	95.8406	95.519	95.9142	97.035	96.2267	98.3945	96.9665	98.7682	97.3888
			1558.23	93.2345	95.2433	94.2259	94.1049	93.8049	86.9914	89.6821	88.8714	95.5215	96.1637	94.6328	95.673	95.5486	95.989	97.1252	96.1636	98.4989	97.0012	98.8518	97.3324
			1558.71	93.147	95.1767	94.2506	94.0828	93.8678	87.3493	89.6967	89.0922	95.6876	96.2266	94.582	95.6613	95.5382	96.0299	97.1829	96.2847	98.5759	97.0816	98.9006	97.3546
			1559.19	93.3216	95.3888	94.2238	94.268	93.8919	87.7042	89.9515	89.276	95.7437	96.231	94.7786	95.8616	95.4655	95.987	97.1563	96.5153	98.5657	97.1656	98.8697	97.4635
			1559.67	93.6448	95.744	94.1578	94.5442	93.8616	87.9116	90.3129	89.3607	95.6759	96.1879	95.1078	96.1556	95.3692	95.8825	97.067	96.739	98.4857	97.2117	98.7884	97.6009
			1560.15	93.9441	96.0628	94.0914	94.7794	93.8088	87.9741	90.6227	89.3733	95.5641	96.1409	95.4082	96.4062	95.2987	95.7767	96.9758	96.9107	98.4008	97.226	98.7176	97.7168
			1560.64	94.1567	96.288	94.0437	94.9391	93.7619	87.9633	90.8378	89.3609	95.468	96.113	95.6254	96.5768	95.2673	95.6995	96.9125	97.0336	98.3453	97.2314	98.6829	97.8042
			1561.12	94.2919	96.4346	94.0148	95.0388	93.7298	87.9295	90.9767	89.3484	95.4031	96.1062	95.7706	96.6838	95.267	95.652	96.8779	97.1191	98.3212	97.2402	98.6811	97.8724
			1561.6	94.3722	96.5275	93.998	95.0976	93.711	87.8956	91.0659	89.3435	95.3648	96.1146	95.8656	96.748	95.2855	95.626	96.8635	97.1753	98.3185	97.2537	98.7005	97.9284
			1562.08	94.4149	96.5841	93.9856	95.1275	93.7009	87.8711	91.1247	89.347	95.3434	96.1317	95.9265	96.7838	95.3118	95.6125	96.8599	97.2066	98.326	97.2681	98.7291	97.9748
			1562.57	94.4312	96.6144	93.9709	95.1351	93.6945	87.8605	91.1671	89.359	95.3298	96.1522	95.9633	96.7995	95.337	95.6039	96.8597	97.2166	98.3332	97.2783	98.7563	98.0114
			1563.05	94.4291	96.6248	93.9487	95.1253	93.688	87.8665	91.2041	89.3796	95.3171	96.1724	95.9829	96.8006	95.3544	95.5939	96.8573	97.2104	98.3321	97.28	98.7742	98.0376
			1563.53	94.4152	96.6209	93.9169	95.1045	93.6798	87.8902	91.245	89.4099	95.3018	96.1907	95.9916	96.7927	95.3609	95.579	96.8504	97.1963	98.3187	97.2723	98.7781	98.0542
			1564.01	94.3967	96.6099	93.8774	95.082	93.6702	87.9299	91.2969	89.4505	95.2844	96.2078	95.996	96.7821	95.3579	95.5593	96.8403	97.1843	98.2942	97.2585	98.7686	98.0643
			1564.49	94.3805	96.5994	93.8368	95.0682	93.662	87.9796	91.3619	89.5009	95.2692	96.226	96.0021	96.7755	95.3508	95.5382	96.8314	97.182	98.2647	97.2462	98.751	98.0724
			1564.98	94.3705	96.5947	93.8035	95.0703	93.6581	88.0305	91.436	89.5584	95.2621	96.2478	96.0131	96.7769	95.3469	95.5217	96.8292	97.1906	98.2393	97.2437	98.7335	98.0819
			1565.46	94.3664	96.5963	93.784	95.088	93.6604	88.0747	91.5093	89.6192	95.2668	96.2742	96.0276	96.786	95.3514	95.5148	96.8373	97.2044	98.2249	97.2557	98.7227	98.0932
			1565.94	94.3633	96.5992	93.7801	95.1134	93.6682	88.109	91.5709	89.6803	95.2836	96.3041	96.0396	96.798	95.3654	95.5189	96.8559	97.2133	98.2233	97.2812	98.7208	98.1025
			1566.42	94.3541	96.5952	93.7893	95.1346	93.6794	88.1362	91.6125	89.741	95.3093	96.3355	96.0418	96.806	95.3859	95.5319	96.8818	97.2082	98.2314	97.3146	98.7253	98.1043
			1566.9	94.3327	96.5769	93.8069	95.141	93.6922	88.1643	91.6307	89.8036	95.3403	96.3668	96.0285	96.8043	95.4091	95.5496	96.9113	97.1838	98.2445	97.3494	98.7322	98.0943
			1567.39	94.2957	96.54	93.8287	95.1263	93.7063	88.2045	91.627	89.8725	95.3739	96.3977	95.9971	96.7901	95.4321	95.5674	96.9415	97.1417	98.2591	97.3804	98.7382	98.0714
			1567.87	94.2445	96.4859	93.8516	95.0912	93.723	88.2682	91.6075	89.9527	95.4093	96.4296	95.9505	96.7654	95.4544	95.582	96.9707	97.0912	98.2744	97.4048	98.7421	98.0398
			1568.35	94.187	96.4234	93.8736	95.045	93.7443	88.3635	91.5828	90.0471	95.4463	96.4642	95.8986	96.7376	95.4766	95.591	96.9982	97.0488	98.2921	97.4221	98.7445	98.0088
			1568.83	94.1383	96.369	93.892	95.0046	93.7701	88.489	91.5675	90.1524	95.4831	96.5016	95.8577	96.7186	95.4979	95.5933	97.022	97.0318	98.3133	97.4317	98.7458	97.9913
			1569.32	94.115	96.341	93.9028	94.9882	93.7953	88.628	91.5754	90.2566	95.5137	96.5373	95.8452	96.7199	95.5135	95.5888	97.0376	97.0463	98.3355	97.4316	98.7434	97.997
			1569.8	94.1258	96.3482	93.9013	95.0039	93.8102	88.7525	91.6113	90.3429	95.5292	96.5636	95.8684	96.7443	95.515	95.5776	97.0393	97.0816	98.3505	97.4186	98.7314	98.0239
			1570.28	94.1631	96.3821	93.8855	95.0423	93.8066	88.8391	91.6671	90.3999	95.5238	96.574	95.9174	96.782	95.4967	95.5603	97.0239	97.1191	98.3499	97.3907	98.705	98.0588
			1570.76	94.2093	96.4239	93.8584	95.0846	93.7836	88.8825	91.7275	90.4283	95.4988	96.5686	95.9731	96.8181	95.4599	95.5377	96.9939	97.1444	98.3313	97.35	98.6647	98.0865
			1571.24	94.2485	96.4575	93.8261	95.1156	93.7473	88.8924	91.7806	90.4369	95.4615	96.5526	96.0198	96.8413	95.4125	95.5111	96.9555	97.1528	98.2993	97.3023	98.6168	98.1
			1571.72	94.2724	96.4753	93.795	95.1295	93.7066	88.8829	91.8204	90.4356	95.4204	96.5336	96.0504	96.8476	95.3639	95.4821	96.9155	97.1458	98.2625	97.2541	98.5698	98.1006
			1572.21	94.2791	96.4762	93.7705	95.1272	93.669	88.8649	91.8459	90.431	95.3827	96.5179	96.0644	96.8375	95.3221	95.4526	96.8799	97.1264	98.229	97.2111	98.5312	98.0937
			1572.69	94.2695	96.4618	93.7562	95.1118	93.6402	88.8458	91.8577	90.427	95.3533	96.51	96.0637	96.8131	95.2919	95.4244	96.8525	97.0965	98.2046	97.1771	98.5059	98.0843
			1573.17	94.2448	96.433	93.7538	95.0854	93.6232	88.8307	91.8565	90.4253	95.3347	96.5124	96.0503	96.7759	95.275	95.3991	96.8356	97.0552	98.192	97.1535	98.4955	98.0749
			1573.65	94.2049	96.3891	93.7631	95.0482	93.6187	88.8252	91.8426	90.428	95.3277	96.5257	96.0251	96.7268	95.27	95.3775	96.83	96.9998	98.1903	97.1397	98.4982	98.0644
			1574.14	94.1495	96.329	93.7812	94.9986	93.6253	88.8376	91.8169	90.4381	95.3315	96.5492	95.9882	96.667	95.2728	95.3607	96.8351	96.9287	98.1962	97.1327	98.5087	98.0494
			1574.62	94.0794	96.2533	93.8023	94.9358	93.6395	88.8789	91.7836	90.4603	95.3442	96.5804	95.942	96.6011	95.2782	95.3494	96.8491	96.8471	98.2039	97.1287	98.5198	98.0258
			1575.1	94.0009	96.1699	93.8185	94.8646	93.6568	88.96	91.7524	90.5002	95.3636	96.6155	95.8939	96.5402	95.2822	95.345	96.8693	96.7723	98.2083	97.1249	98.5249	97.9939
			1575.58	93.9291	96.0981	93.8219	94.8008	93.6726	89.0823	91.7402	90.5602	95.3867	96.6496	95.8593	96.504	95.2849	95.3492	96.892	96.7314	98.2079	97.122	98.523	97.9626
			1576.06	93.8854	96.0634	93.8094	94.7677	93.6843	89.2275	91.7641	90.6339	95.4104	96.6773	95.8563	96.5125	95.2916	95.3622	96.9132	96.7433	98.2067	97.1243	98.5203	97.9488
			1576.55	93.8841	96.0803	93.7858	94.7816	93.6921	89.3598	91.8284	90.706	95.4301	96.6948	95.8929	96.5702	95.308	95.381	96.9288	96.8021	98.2107	97.1354	98.5266	97.9653
			1577.03	93.9203	96.1384	93.7606	94.8366	93.6978	89.4484	91.9194	90.7614	95.4416	96.7012	95.958	96.6592	95.3331	95.3999	96.9361	96.882	98.2212	97.1533	98.5449	98.0087
			1577.51	93.9748	96.2103	93.7403	94.9099	93.7018	89.4864	92.0152	90.795	95.4425	96.6977	96.0302	96.7516	95.3593	95.4137	96.9342	96.957	98.2331	97.171	98.5691	98.0618
			1577.99	94.0278	96.2717	93.7261	94.9785	93.7035	89.4869	92.1001	90.8114	95.433	96.686	96.0919	96.8273	95.3787	95.4203	96.9238	97.0123	98.2395	97.1814	98.5896	98.1063
			1578.47	94.0682	96.3109	93.7164	95.0295	93.7026	89.4687	92.1681	90.8194	95.4158	96.668	96.1353	96.8789	95.3875	95.4209	96.9069	97.0449	98.2361	97.1818	98.6	98.1326
			1578.96	94.0927	96.3274	93.7094	95.0603	93.6996	89.447	92.2202	90.8266	95.3954	96.6459	96.1613	96.9086	95.387	95.4181	96.8866	97.059	98.2235	97.1736	98.5994	98.1398
			1579.44	94.1039	96.328	93.7046	95.0749	93.6963	89.4314	92.2599	90.8384	95.3772	96.6221	96.1747	96.9231	95.3817	95.4158	96.8665	97.0624	98.205	97.1612	98.591	98.1333
			1579.92	94.1065	96.3223	93.7026	95.0804	93.6951	89.4261	92.2913	90.8573	95.3663	96.5994	96.182	96.9302	95.3772	95.4173	96.85	97.0625	98.186	97.15	98.5803	98.1215
			1580.4	94.106	96.3196	93.7039	95.0839	93.6982	89.4316	92.3175	90.8833	95.3661	96.5801	96.1885	96.9364	95.3779	95.4247	96.8396	97.064	98.1709	97.1445	98.5726	98.1124
			1580.89	94.1064	96.3255	93.7085	95.0904	93.706	89.4457	92.34	90.9142	95.3764	96.5655	96.1968	96.9453	95.3845	95.4376	96.8357	97.0673	98.1615	97.1459	98.5701	98.1109
			1581.37	94.1093	96.3405	93.7148	95.101	93.7173	89.4651	92.3587	90.9463	95.3926	96.555	96.2061	96.9566	95.3935	95.4531	96.8359	97.0688	98.1556	97.1519	98.5714	98.1171
			1581.85	94.1129	96.3595	93.72	95.1133	93.7287	89.4863	92.3729	90.9754	95.4074	96.5467	96.2128	96.9665	95.3985	95.4662	96.8362	97.0638	98.1486	97.1571	98.5714	98.126
			1582.33	94.1137	96.3743	93.7214	95.1234	93.7371	89.5068	92.3816	90.9984	95.4132	96.5382	96.2127	96.97	95.3934	95.4718	96.8326	97.0495	98.1356	97.1561	98.5646	98.1309
			1582.81	94.1078	96.3777	93.7175	95.128	93.7402	89.5254	92.385	91.0135	95.4057	96.528	96.2034	96.9634	95.376	95.4669	96.8231	97.0271	98.1148	97.1458	98.5478	98.1264
			1583.3	94.0933	96.3663	93.7091	95.1269	93.7384	89.5412	92.3842	91.0204	95.3854	96.5159	96.1858	96.9465	95.3495	95.4517	96.8091	97.0014	98.0887	97.1274	98.5224	98.1116
			1583.78	94.0704	96.3415	93.6984	95.122	93.7335	89.5533	92.381	91.0202	95.3569	96.5032	96.1635	96.9221	95.3213	95.4292	96.7939	96.9779	98.0636	97.105	98.4934	98.0897
			1584.26	94.0412	96.3077	93.6883	95.1156	93.7285	89.5608	92.3772	91.0143	95.3268	96.4914	96.1411	96.8952	95.2995	95.4036	96.7814	96.9601	98.0458	97.0835	98.4669	98.0661
			1584.74	94.0084	96.2698	93.6805	95.1085	93.725	89.5629	92.3735	91.0047	95.3006	96.4813	96.1218	96.8702	95.2891	95.3789	96.7735	96.9471	98.0391	97.0654	98.4471	98.0448
			1585.22	93.9739	96.2311	93.6746	95.0986	93.7233	89.5598	92.3696	90.9937	95.2805	96.4719	96.106	96.8496	95.2898	95.357	96.7693	96.934	98.0421	97.05	98.4339	98.0263
			1585.71	93.9381	96.1919	93.669	95.082	93.7225	89.5526	92.3644	90.9832	95.2651	96.4615	96.0914	96.833	95.2965	95.3381	96.7655	96.9148	98.0493	97.0337	98.4239	98.0079
			1586.19	93.9	96.1507	93.6615	95.0553	93.7212	89.5436	92.3562	90.9746	95.2512	96.4481	96.0747	96.8182	95.3019	95.321	96.7579	96.8856	98.0537	97.0129	98.4123	97.9851
			1586.67	93.8588	96.1061	93.6504	95.018	93.7188	89.5345	92.3445	90.968	95.2356	96.4304	96.0541	96.8026	95.3006	95.3043	96.7441	96.8468	98.05	96.9864	98.3959	97.9552
			1587.15	93.8149	96.0583	93.6359	94.9738	93.7159	89.5261	92.3295	90.9619	95.2172	96.4087	96.0299	96.785	95.2908	95.2875	96.724	96.8033	98.0367	96.9562	98.3747	97.9188
			1587.63	93.7701	96.0095	93.6195	94.9295	93.7137	89.5176	92.3123	90.9536	95.1968	96.3841	96.0055	96.7657	95.2749	95.2709	96.6996	96.762	98.0159	96.9272	98.3513	97.8796
			1588.12	93.7274	95.9632	93.6028	94.8918	93.7127	89.5068	92.2944	90.9397	95.1764	96.3573	95.9848	96.7457	95.257	95.2554	96.6738	96.7285	97.9912	96.904	98.3287	97.8428
			1588.6	93.6895	95.9222	93.5865	94.8649	93.7118	89.4915	92.2768	90.9175	95.157	96.3284	95.9706	96.7261	95.2399	95.2409	96.6483	96.7044	97.9648	96.8884	98.3076	97.812
			1589.08	93.6583	95.8872	93.5702	94.848	93.7079	89.4699	92.2599	90.8858	95.1378	96.2964	95.9626	96.7066	95.2237	95.2266	96.6228	96.6871	97.9365	96.8784	98.2856	97.7874
			1589.56	93.6331	95.8568	93.5522	94.8362	93.6978	89.4422	92.243	90.8462	95.1166	96.2602	95.9577	96.6858	95.2055	95.211	96.5957	96.6714	97.904	96.8685	98.2583	97.7661
			1590.05	93.612	95.8285	93.5314	94.8227	93.6798	89.4098	92.2252	90.8023	95.0909	96.2202	95.9514	96.6625	95.182	95.1935	96.5657	96.6533	97.8654	96.8532	98.222	97.7442
			1590.53	93.5925	95.8007	93.5084	94.8032	93.6552	89.3746	92.2058	90.7587	95.0603	96.1792	95.9403	96.6369	95.1524	95.1749	96.5334	96.6315	97.8216	96.8303	98.1772	97.7201
			1591.01	93.5733	95.7739	93.4857	94.7779	93.6288	89.3381	92.1851	90.7196	95.0269	96.1417	95.9237	96.6113	95.1194	95.1579	96.5021	96.6084	97.7773	96.8016	98.1293	97.6957
			1591.49	93.5551	95.7501	93.4669	94.751	93.607	89.3007	92.1644	90.6874	94.9947	96.1129	95.9042	96.5896	95.0889	95.1457	96.4767	96.5876	97.739	96.7723	98.0861	97.676
			1591.97	93.5396	95.7316	93.4551	94.7287	93.5951	89.2622	92.1453	90.6627	94.9678	96.096	95.8855	96.5757	95.0666	95.1407	96.461	96.5716	97.7125	96.7476	98.0547	97.6662
			1592.46	93.5289	95.7191	93.4507	94.7154	93.5948	89.2219	92.1294	90.6437	94.9479	96.0906	95.8711	96.5715	95.0552	95.1427	96.4559	96.5593	97.6992	96.7294	98.0376	97.6685
			1592.94	93.5237	95.7103	93.4511	94.7114	93.6033	89.1798	92.117	90.6277	94.933	96.0919	95.8617	96.5757	95.0527	95.1483	96.4577	96.5464	97.695	96.7145	98.0309	97.6802
			1593.42	93.5228	95.7009	93.451	94.713	93.6141	89.1362	92.1078	90.6116	94.918	96.0921	95.8554	96.5844	95.0526	95.1522	96.4596	96.5279	97.6916	96.696	98.0259	97.6939
			1593.9	93.5235	95.6861	93.4448	94.7143	93.6195	89.0917	92.1002	90.5921	94.8972	96.0831	95.8488	96.5919	95.0469	95.1492	96.4537	96.5008	97.6803	96.6662	98.0131	97.7005
			1594.38	93.5223	95.6639	93.429	94.7103	93.6145	89.0464	92.0921	90.5673	94.8668	96.0599	95.8389	96.5938	95.0305	95.1366	96.4354	96.4665	97.656	96.6213	97.9873	97.6939
			1594.87	93.5165	95.6355	93.4043	94.6993	93.5981	88.9992	92.0819	90.5358	94.8267	96.0221	95.8249	96.588	95.0036	95.1158	96.4051	96.4305	97.6199	96.5634	97.9503	97.6731
			1595.35	93.5047	95.6048	93.3749	94.6831	93.5744	88.9486	92.0684	90.4974	94.7808	95.9744	95.8082	96.5759	94.971	95.0912	96.3679	96.3991	97.5782	96.5002	97.9095	97.6422
			1595.83	93.4875	95.5759	93.3472	94.665	93.5496	88.893	92.0511	90.4527	94.7345	95.9236	95.7915	96.5603	94.9399	95.068	96.3316	96.3756	97.5384	96.441	97.8739	97.6079
			1596.31	93.4659	95.5503	93.3261	94.6463	93.5292	88.8323	92.0295	90.4032	94.6919	95.8757	95.7764	96.5436	94.9155	95.0497	96.3021	96.3589	97.5047	96.3925	97.8488	97.5751
			1596.8	93.4409	95.5258	93.3134	94.6257	93.5152	88.7681	92.0034	90.3504	94.6537	95.8338	95.7627	96.5262	94.8983	95.0359	96.2811	96.3437	97.4761	96.3557	97.8333	97.5441
			1597.28	93.4131	95.4975	93.3076	94.5995	93.5063	88.7029	91.9722	90.296	94.6176	95.7971	95.7483	96.5069	94.8851	95.0232	96.2661	96.3242	97.4472	96.3268	97.8211	97.5116
			1597.76	93.3829	95.4615	93.3049	94.5645	93.4986	88.6392	91.9357	90.2411	94.5802	95.7631	95.7313	96.484	94.8704	95.0072	96.2522	96.2973	97.4118	96.2994	97.8042	97.4732
			1598.24	93.3512	95.4168	93.3015	94.521	93.4887	88.5785	91.8942	90.1863	94.5391	95.7292	95.7113	96.4574	94.8508	94.9846	96.2348	96.2646	97.367	96.269	97.7779	97.4269
			1598.72	93.3196	95.3669	93.2952	94.4734	93.4746	88.5201	91.8489	90.1316	94.4944	95.6943	95.6901	96.429	94.8257	94.9547	96.2123	96.2316	97.3149	96.2343	97.7425	97.3753
			1599.21	93.2905	95.3182	93.2854	94.4295	93.4567	88.4623	91.8018	90.0769	94.449	95.659	95.6714	96.4032	94.798	94.9199	96.186	96.2049	97.2615	96.1976	97.7027	97.3249
			1599.69	93.2658	95.2777	93.2732	94.3973	93.4365	88.4027	91.7553	90.0224	94.4062	95.6251	95.6586	96.3846	94.7711	94.8839	96.1596	96.1881	97.2141	96.1622	97.6648	97.2831
			1600.17	93.246	95.2489	93.2594	94.381	93.4159	88.3402	91.711	89.9687	94.3688	95.5936	95.6524	96.3756	94.7475	94.8506	96.1367	96.1795	97.1773	96.1304	97.633	97.2548
			1600.65	93.2297	95.2302	93.2444	94.3786	93.3958	88.2751	91.6695	89.9169	94.3367	95.5644	95.6496	96.3753	94.7265	94.8221	96.119	96.1716	97.1508	96.1016	97.6065	97.2392
			1601.13	93.2134	95.2147	93.2276	94.3822	93.3759	88.2095	91.6294	89.8681	94.3077	95.5358	95.6435	96.3787	94.7051	94.7988	96.1059	96.1545	97.1297	96.0724	97.5807	97.2297
			1601.62	93.1933	95.1935	93.2088	94.3812	93.3556	88.1456	91.5882	89.8227	94.2785	95.5061	95.6266	96.379	94.6798	94.7801	96.0948	96.1207	97.1076	96.0394	97.5496	97.2166
			1602.1	93.1672	95.1599	93.1887	94.3674	93.3354	88.0845	91.543	89.7795	94.2473	95.475	95.594	96.3704	94.6499	94.7659	96.0832	96.0693	97.0805	96.0017	97.5109	97.1922
			1602.58	93.1358	95.1126	93.17	94.3385	93.3173	88.0252	91.4924	89.736	94.2147	95.4439	95.5459	96.3507	94.6179	94.757	96.0701	96.0065	97.0494	95.9622	97.4676	97.1542
			1603.06	93.1028	95.0564	93.1562	94.2988	93.3045	87.9647	91.4367	89.6885	94.1835	95.4155	95.4883	96.3221	94.5889	94.7556	96.0559	95.9424	97.0196	95.9261	97.4271	97.1066
			1603.55	93.0731	94.9991	93.1498	94.2564	93.2989	87.8992	91.3785	89.6336	94.1562	95.392	95.4299	96.29	94.5672	94.7626	96.0414	95.8867	96.9965	95.8976	97.3967	97.0574
			1604.03	93.0507	94.9477	93.1507	94.2187	93.3003	87.8258	91.3216	89.5691	94.1328	95.3728	95.3789	96.2603	94.5528	94.7766	96.0261	95.8443	96.9821	95.8766	97.3787	97.014
			1604.51	93.0369	94.9049	93.1556	94.1886	93.3053	87.7439	91.269	89.4943	94.1098	95.3542	95.3393	96.236	94.541	94.793	96.0076	95.814	96.9723	95.8574	97.3683	96.9794
			1604.99	93.0295	94.8694	93.1588	94.1642	93.3086	87.654	91.222	89.4103	94.0815	95.3304	95.3102	96.2172	94.5238	94.8051	95.9823	95.7908	96.9588	95.831	97.3549	96.9519
			1605.47	93.0244	94.8371	93.1547	94.1406	93.3047	87.5575	91.1795	89.3186	94.0422	95.2956	95.2877	96.2009	94.4945	94.8063	95.9466	95.7694	96.9324	95.789	97.3273	96.9265
			1605.96	93.0171	94.8048	93.1395	94.1137	93.2902	87.4546	91.1382	89.2209	93.9891	95.2467	95.267	96.1837	94.4503	94.7926	95.8998	95.7466	96.8876	95.7274	97.2785	96.899
			1606.44	93.0045	94.7721	93.113	94.0827	93.265	87.3444	91.0937	89.1184	93.9235	95.1838	95.2453	96.1627	94.3945	94.7639	95.8444	95.7227	96.825	95.6488	97.2089	96.8679
			1606.92	92.9855	94.7415	93.0786	94.0503	93.2318	87.2245	91.0416	89.0119	93.8503	95.1111	95.2221	96.1375	94.3351	94.7238	95.7856	95.7	96.7509	95.5612	97.1268	96.8355
			1607.4	92.9609	94.7167	93.0418	94.021	93.1949	87.0933	90.9787	88.9021	93.7759	95.0347	95.1996	96.1091	94.2811	94.6784	95.7301	95.6797	96.6741	95.4751	97.0438	96.8059
			1607.88	92.932	94.6993	93.0078	93.9978	93.158	86.9513	90.9037	88.7896	93.7052	94.9597	95.1795	96.0789	94.238	94.6337	95.6821	95.6599	96.6017	95.398	96.9703	96.7816
			1608.37	92.8997	94.6871	92.9798	93.9795	93.1225	86.8017	90.8183	88.6749	93.6384	94.8889	95.1619	96.0476	94.2046	94.593	95.6415	95.6356	96.5356	95.3314	96.9097	96.7616
			1608.85	92.8633	94.6737	92.9576	93.9604	93.0873	86.6494	90.7255	88.5582	93.5719	94.8215	95.1445	96.0145	94.174	94.5561	95.6044	95.6015	96.4723	95.2706	96.8575	96.7405
			1609.33	92.8218	94.6527	92.9388	93.9342	93.0502	86.4989	90.6297	88.4382	93.5006	94.7545	95.1237	95.9784	94.1378	94.5207	95.5651	95.5554	96.4065	95.2085	96.8055	96.712
			1609.81	92.7748	94.6209	92.9209	93.8976	93.0101	86.352	90.5348	88.3133	93.4214	94.686	95.0968	95.9387	94.0918	94.4848	95.5198	95.5005	96.3357	95.1408	96.7469	96.6728
			1610.3	92.7235	94.5804	92.9025	93.8529	92.9685	86.207	90.4439	88.1816	93.3357	94.6165	95.0642	95.8967	94.0383	94.4483	95.4689	95.4439	96.2632	95.0692	96.6815	96.6245
			1610.78	92.6709	94.5372	92.8841	93.8071	92.9283	86.0604	90.3589	88.0426	93.2488	94.5489	95.0285	95.8552	93.9847	94.4137	95.4166	95.3931	96.1959	94.9999	96.6149	96.5733
			1611.26	92.6207	94.4976	92.8668	93.7682	92.8927	85.9089	90.2804	87.8979	93.1668	94.4873	94.9934	95.8168	93.9393	94.3841	95.3682	95.3516	96.1411	94.9402	96.555	96.5258
			1611.74	92.5749	94.4644	92.8507	93.7403	92.8632	85.7515	90.2073	87.7512	93.0938	94.4339	94.9609	95.7824	93.9061	94.3611	95.3271	95.3176	96.1011	94.8934	96.5069	96.4857
			1612.22	92.5331	94.4351	92.8348	93.722	92.8388	85.5899	90.1371	87.6073	93.0296	94.3886	94.9303	95.7505	93.8833	94.3441	95.2935	95.2843	96.0722	94.8576	96.4703	96.4519
			1612.71	92.4925	94.4032	92.8166	93.7068	92.8171	85.4278	90.0656	87.4705	92.9707	94.3487	94.898	95.7175	93.8645	94.3298	95.2641	95.2429	96.0462	94.8262	96.4395	96.4189
[truncated: 4,952 more rows]

## Sheet: 1500-1650cm-1
	#	Designation
	121	Normal soil + PBSA (PS treatment)
	122	Normal soil + PBSA (PS treatment)
	123	Normal soil + PBSA (PS treatment)
	124	Normal soil + PBSA (PS treatment)
	125	Normal soil + PBSA (PS treatment)
	131	Normal soil + Naddition+PBSA (PSN treatment)
	132	Normal soil + Naddition+PBSA (PSN treatment)
	133	Normal soil + Naddition+PBSA (PSN treatment)
	134	Normal soil + Naddition+PBSA (PSN treatment)
	135	Normal soil + Naddition+PBSA (PSN treatment)
	141	Sterile normal soil+PBSA
	142	Sterile normal soil+PBSA
	143	Sterile normal soil+PBSA
	144	Sterile normal soil+PBSA
	145	Sterile normal soil+PBSA
	151	PBSA
	152	PBSA
	153	PBSA
	154	PBSA
	155	PBSA
	#	Designation
	121	Normal soil + PBSA (PS treatment)
	122	Normal soil + PBSA (PS treatment)
	123	Normal soil + PBSA (PS treatment)
	124	Normal soil + PBSA (PS treatment)
	125	Normal soil + PBSA (PS treatment)
	131	Normal soil + Naddition+PBSA (PSN treatment)
	132	Normal soil + Naddition+PBSA (PSN treatment)
	133	Normal soil + Naddition+PBSA (PSN treatment)
	134	Normal soil + Naddition+PBSA (PSN treatment)
	135	Normal soil + Naddition+PBSA (PSN treatment)
	141	Sterile normal soil+PBSA
	142	Sterile normal soil+PBSA
	143	Sterile normal soil+PBSA
	144	Sterile normal soil+PBSA
	145	Sterile normal soil+PBSA
	151	PBSA
	152	PBSA
	153	PBSA
	154	PBSA
	155	PBSA
			94.8217	96.1814	95.0686	95.7857	94.8392	85.5071	90.7548	88.0228	95.4324	95.6641	95.5585	96.4886	96.4729	96.3258	97.0812	96.9223	98.2646	96.8445	98.6637	97.7093

## Sheet: full ATR-FTIR spectra
	#	Designation
	121	Normal soil + PBSA (PS treatment)
	122	Normal soil + PBSA (PS treatment)
	123	Normal soil + PBSA (PS treatment)
	124	Normal soil + PBSA (PS treatment)
	125	Normal soil + PBSA (PS treatment)
	131	Normal soil + Naddition+PBSA (PSN treatment)
	132	Normal soil + Naddition+PBSA (PSN treatment)
	133	Normal soil + Naddition+PBSA (PSN treatment)
	134	Normal soil + Naddition+PBSA (PSN treatment)
	135	Normal soil + Naddition+PBSA (PSN treatment)
	141	Sterile normal soil+PBSA
	142	Sterile normal soil+PBSA
	143	Sterile normal soil+PBSA
	144	Sterile normal soil+PBSA
	145	Sterile normal soil+PBSA
	151	PBSA
	152	PBSA
	153	PBSA
	154	PBSA
	155	PBSA
	#	Designation
	121	Normal soil + PBSA (PS treatment)
	122	Normal soil + PBSA (PS treatment)
	123	Normal soil + PBSA (PS treatment)
	124	Normal soil + PBSA (PS treatment)
	125	Normal soil + PBSA (PS treatment)
	131	Normal soil + Naddition+PBSA (PSN treatment)
	132	Normal soil + Naddition+PBSA (PSN treatment)
	133	Normal soil + Naddition+PBSA (PSN treatment)
	134	Normal soil + Naddition+PBSA (PSN treatment)
	135	Normal soil + Naddition+PBSA (PSN treatment)
	141	Sterile normal soil+PBSA
	142	Sterile normal soil+PBSA
	143	Sterile normal soil+PBSA
	144	Sterile normal soil+PBSA
	145	Sterile normal soil+PBSA
	151	PBSA
	152	PBSA
	153	PBSA
	154	PBSA
	155	PBSA
			94.8217	96.1814	95.0686	95.7857	94.8392	85.5071	90.7548	88.0228	95.4324	95.6641	95.5585	96.4886	96.4729	96.3258	97.0812	96.9223	98.2646	96.8445	98.6637	97.7093
