# Supplementary material for: Nitrogen fixing bacteria facilitate microbial biodegradation of a bio-based and biodegradable plastic in soils under ambient and future climatic conditions
Source: Royal Society of Chemistry journal article supplement (doi:10.1039/d1em00426c), 2022-01-01
Supplement: d1em00426c3.xlsx [file d1em00426c3.xlsx]

## Sheet: TableS1
Table S1. Normalized reads of potential N-fixing bacteria detected on PBSA at 180 and 328 days.
	Ambient (180)	Ambient (180)	Ambient (180)	Ambient (180)	Ambient (180)	Future (180)	Future (180)	Future (180)	Future (180)	Future (180)	Ambient (328)	Ambient (328)	Ambient (328)	Ambient (328)	Ambient (328)	Future (328)	Future (328)	Future (328)	Future (328)	Future (328)
OTU_ID/sum Genus	P2B1	P2B3	P2B5	P2B8	P2B10	P2B2	P2B4	P2B6	P2B7	P2B9	P5B1	P5B3	P5B5	P5B8	P5B10	P5B2	P5B4	P5B6	P5B7	P5B9	Function	Phylum	Order	Family	Genus
Otu0340	4	4	2	5	4	0	7	1	3	7	4	4	5	2	4	7	0	1	5	5	NSNAB	Actinobacteria	Corynebacteriales	Mycobacteriaceae	Mycobacterium
Otu2508	0	0	0	0	0	0	0	0	0	0	0	0	0	0	0	0	0	0	1	0	NSNAB	Actinobacteria	Corynebacteriales	Mycobacteriaceae	Mycobacterium
Otu0868	0	0	1	0	2	0	0	0	1	0	0	2	2	0	0	2	0	2	2	1	NSNAB	Actinobacteria	Corynebacteriales	Mycobacteriaceae	Mycobacterium
Otu1704	0	1	0	0	0	0	0	0	1	1	0	0	0	0	1	1	0	0	0	0	NSNAB	Actinobacteria	Corynebacteriales	Mycobacteriaceae	Mycobacterium
Otu1675	0	0	1	0	0	0	0	0	1	0	1	0	0	0	0	1	0	0	0	0	NSNAB	Actinobacteria	Corynebacteriales	Mycobacteriaceae	Mycobacterium
Otu2855	0	0	0	0	0	0	0	0	0	0	0	0	0	0	0	1	0	1	0	0	NSNAB	Actinobacteria	Corynebacteriales	Mycobacteriaceae	Mycobacterium
Otu0012	53	80	91	175	138	59	164	236	276	263	500	462	670	66	564	1386	13	572	678	498	NSNAB	Actinobacteria	Corynebacteriales	Mycobacteriaceae	Mycobacterium
Mycobacterium	57	85	95	180	144	59	171	237	282	271	505	468	677	68	569	1398	13	576	686	504	NSNAB	Actinobacteria	Corynebacteriales	Mycobacteriaceae	Mycobacterium
Otu1759	0	0	0	0	0	0	0	0	0	0	0	0	0	0	0	0	1	0	0	0	NSNFB	Firmicutes	Bacillales	Bacillaceae	Bacillus
Otu2597	0	0	0	0	0	0	0	0	0	0	0	0	0	0	0	0	0	0	0	0	NSNFB	Firmicutes	Bacillales	Bacillaceae	Bacillus
Otu0128	1	4	3	1	1	1	5	1	3	0	3	3	0	2	0	4	3	3	2	1	NSNFB	Firmicutes	Bacillales	Bacillaceae	Bacillus
Otu0695	0	0	0	0	0	0	0	0	0	2	0	0	0	0	1	0	0	0	0	0	NSNFB	Firmicutes	Bacillales	Bacillaceae	Bacillus
Otu0081	4	5	5	70	8	7	2	19	5	13	3	1	0	4	4	10	3	7	2	11	NSNFB	Firmicutes	Bacillales	Bacillaceae	Bacillus
Otu1824	0	0	0	0	0	0	0	0	0	0	0	0	0	0	0	0	0	0	0	0	NSNFB	Firmicutes	Bacillales	Bacillaceae	Bacillus
Otu1985	0	0	0	0	0	0	0	0	0	0	0	0	0	0	0	0	0	0	0	0	NSNFB	Firmicutes	Bacillales	Bacillaceae	Bacillus
Otu0092	4	4	5	4	0	12	5	2	12	3	1	2	2	2	0	7	7	14	3	6	NSNFB	Firmicutes	Bacillales	Bacillaceae	Bacillus
Otu0467	0	1	2	0	1	1	0	0	0	1	0	0	1	0	2	2	0	1	0	0	NSNFB	Firmicutes	Bacillales	Bacillaceae	Bacillus
Otu1258	0	0	0	0	1	0	0	1	0	0	0	0	0	0	0	0	0	0	0	0	NSNFB	Firmicutes	Bacillales	Bacillaceae	Bacillus
Otu1803	0	0	0	0	0	0	0	0	0	0	0	0	0	0	0	0	0	0	0	0	NSNFB	Firmicutes	Bacillales	Bacillaceae	Bacillus
Otu1914	0	1	0	4	0	0	0	0	0	0	0	0	0	0	0	0	0	0	0	0	NSNFB	Firmicutes	Bacillales	Bacillaceae	Bacillus
Otu2320	0	0	0	0	0	0	1	0	0	0	0	0	0	0	0	0	0	0	0	0	NSNFB	Firmicutes	Bacillales	Bacillaceae	Bacillus
Otu2639	0	0	0	0	0	0	0	0	0	1	0	0	0	0	0	0	0	0	0	0	NSNFB	Firmicutes	Bacillales	Bacillaceae	Bacillus
Bacillus	9	15	15	79	11	21	13	23	20	20	7	6	3	8	7	23	14	25	7	18	NSNFB	Firmicutes	Bacillales	Bacillaceae	Bacillus
Otu1117	3	0	0	0	3	3	0	0	0	1	0	0	0	0	0	0	1	0	1	0	NSNPB	Proteobacteria	Rhizobiales	Xanthobacteraceae	Rhodopseudomonas
Rhodopseudomonas	3	0	0	0	3	3	0	0	0	1	0	0	0	0	0	0	1	0	1	0	NSNPB	Proteobacteria	Rhizobiales	Xanthobacteraceae	Rhodopseudomonas
Otu1067	0	0	0	5	0	0	0	2	1	3	0	0	1	0	0	0	0	0	0	0	SNB	Proteobacteria	Rhizobiales	Rhizobiaceae	Aminobacter
Aminobacter	0	0	0	5	0	0	0	2	1	3	0	0	1	0	0	0	0	0	0	0	SNB	Proteobacteria	Rhizobiales	Rhizobiaceae	Aminobacter
Otu0062	187	131	105	169	194	80	271	66	276	106	24	46	34	7	103	80	4	23	15	13	SNB	Proteobacteria	Rhizobiales	Rhizobiaceae	ANPR
Otu0415	14	5	4	5	1	3	9	2	13	9	0	0	3	0	2	0	0	0	0	0	SNB	Proteobacteria	Rhizobiales	Rhizobiaceae	ANPR
Otu1265	0	0	4	0	0	1	1	3	1	1	1	0	0	0	0	0	0	0	0	0	SNB	Proteobacteria	Rhizobiales	Rhizobiaceae	ANPR
Otu2138	0	1	0	0	1	0	0	0	1	1	0	0	0	0	0	0	0	0	0	0	SNB	Proteobacteria	Rhizobiales	Rhizobiaceae	ANPR
Otu0136	21	8	44	68	32	40	29	34	29	74	4	0	5	0	6	2	2	6	6	19	SNB	Proteobacteria	Rhizobiales	Rhizobiaceae	ANPR
ANPR	222	145	157	242	228	124	310	105	320	191	29	46	42	7	111	82	6	29	21	32	SNB	Proteobacteria	Rhizobiales	Rhizobiaceae	ANPR
Otu2232	0	1	0	0	0	2	0	0	0	0	0	0	0	0	0	1	0	0	0	0	SNB	Proteobacteria	Betaproteobacteriales	Burkholderiaceae	BCP
Otu0922	1	2	1	0	0	1	5	0	0	0	2	1	0	0	0	0	0	0	0	0	SNB	Proteobacteria	Betaproteobacteriales	Burkholderiaceae	BCP
BCP	1	3	1	0	0	3	5	0	0	0	2	1	0	0	0	1	0	0	0	0	SNB	Proteobacteria	Betaproteobacteriales	Burkholderiaceae	BCP
Otu1988	1	0	0	0	0	2	0	0	0	1	1	0	0	0	0	0	0	0	0	0	SNB	Proteobacteria	Rhizobiales	Xanthobacteraceae	Bradyrhizobium
Otu2103	1	0	1	0	0	0	0	0	1	0	0	0	0	0	0	0	0	0	0	0	SNB	Proteobacteria	Rhizobiales	Xanthobacteraceae	Bradyrhizobium
Otu2629	0	0	1	0	0	0	0	0	1	0	0	0	0	0	0	0	0	0	0	0	SNB	Proteobacteria	Rhizobiales	Xanthobacteraceae	Bradyrhizobium
Otu0673	1	0	8	6	3	0	2	1	1	7	0	0	1	0	0	0	1	0	0	0	SNB	Proteobacteria	Rhizobiales	Xanthobacteraceae	Bradyrhizobium
Otu0027	306	142	582	375	165	622	361	162	450	458	86	31	152	2	48	191	81	14	206	89	SNB	Proteobacteria	Rhizobiales	Xanthobacteraceae	Bradyrhizobium
Bradyrhizobium	309	142	592	381	168	624	363	163	453	466	87	31	153	2	48	191	82	14	206	89	SNB	Proteobacteria	Rhizobiales	Xanthobacteraceae	Bradyrhizobium
Otu0049	143	102	80	178	115	106	163	237	244	384	79	90	71	0	53	202	5	58	56	26	SNB	Proteobacteria	Rhizobiales	Devosiaceae	Devosia
Otu1097	1	0	6	1	1	2	0	0	0	1	1	1	0	0	0	0	0	0	0	0	SNB	Proteobacteria	Rhizobiales	Devosiaceae	Devosia
Otu1695	0	1	0	0	0	1	0	0	2	2	0	0	0	0	0	0	0	0	0	0	SNB	Proteobacteria	Rhizobiales	Devosiaceae	Devosia
Otu1729	1	1	0	1	0	0	1	0	0	0	1	0	1	0	0	0	0	0	0	0	SNB	Proteobacteria	Rhizobiales	Devosiaceae	Devosia
Otu2100	0	1	1	1	0	0	0	0	0	0	0	2	0	0	0	0	0	0	0	0	SNB	Proteobacteria	Rhizobiales	Devosiaceae	Devosia
Otu2382	1	0	0	0	0	0	0	0	0	0	0	0	0	0	0	1	0	0	0	0	SNB	Proteobacteria	Rhizobiales	Devosiaceae	Devosia
Otu1321	2	1	2	3	0	0	0	0	0	0	0	1	1	0	0	0	0	0	0	0	SNB	Proteobacteria	Rhizobiales	Devosiaceae	Devosia
Otu0022	272	308	427	539	565	468	76	425	150	296	399	574	62	13	96	87	16	180	70	182	SNB	Proteobacteria	Rhizobiales	Devosiaceae	Devosia
Otu0029	320	295	266	412	465	235	149	359	302	333	179	111	106	49	134	122	34	181	122	96	SNB	Proteobacteria	Rhizobiales	Devosiaceae	Devosia
Otu0123	52	44	6	27	33	9	18	58	140	72	4	11	1	0	3	51	3	14	6	7	SNB	Proteobacteria	Rhizobiales	Devosiaceae	Devosia
Devosia	792	753	788	1162	1179	821	407	1079	838	1088	663	790	242	62	286	463	58	433	254	311	SNB	Proteobacteria	Rhizobiales	Devosiaceae	Devosia
Otu0101	17	42	42	83	49	36	38	30	72	88	6	16	55	0	25	36	3	5	33	8	SNB	Proteobacteria	Rhizobiales	Rhizobiaceae	Mesorhizobium
Otu1969	0	0	0	0	0	0	0	0	1	2	0	0	0	0	0	1	0	0	0	0	SNB	Proteobacteria	Rhizobiales	Rhizobiaceae	Mesorhizobium
Mesorhizobium	17	42	42	83	49	36	38	30	73	90	6	16	55	0	25	37	3	5	33	8	SNB	Proteobacteria	Rhizobiales	Rhizobiaceae	Mesorhizobium
Otu0195	4	13	10	10	12	14	2	20	2	17	4	3	5	16	5	1	43	9	0	2	SNB	Proteobacteria	Rhizobiales	Beijerinckiaceae	Methylobacterium
Otu0016	299	212	118	21	81	22	22	138	202	130	631	246	305	1048	1164	406	114	712	181	266	SNB	Proteobacteria	Rhizobiales	Beijerinckiaceae	Methylobacterium
Otu0280	4	0	0	0	13	0	7	10	21	0	4	5	2	22	13	27	16	11	0	2	SNB	Proteobacteria	Rhizobiales	Beijerinckiaceae	Methylobacterium
Otu1232	0	0	0	1	1	2	1	3	0	1	0	0	0	0	1	0	1	0	0	0	SNB	Proteobacteria	Rhizobiales	Beijerinckiaceae	Methylobacterium
Otu0056	91	157	94	146	126	59	54	194	67	121	102	69	34	305	165	69	23	131	27	27	SNB	Proteobacteria	Rhizobiales	Beijerinckiaceae	Methylobacterium
Otu0193	3	51	22	6	51	1	7	35	8	0	8	2	3	31	9	14	0	22	0	1	SNB	Proteobacteria	Rhizobiales	Beijerinckiaceae	Methylobacterium
Methylobacterium	401	433	244	184	284	98	93	400	300	269	749	325	349	1422	1357	517	197	885	208	298	SNB	Proteobacteria	Rhizobiales	Beijerinckiaceae	Methylobacterium
Otu0712	0	0	0	0	2	7	0	1	0	0	0	0	1	2	0	0	1	0	0	0	SNB	Proteobacteria	Rhizobiales	Beijerinckiaceae	Microvirga
Otu0096	39	15	24	4	4	74	27	5	68	76	2	4	6	6	6	8	110	20	4	0	SNB	Proteobacteria	Rhizobiales	Beijerinckiaceae	Microvirga
Otu0398	8	2	3	3	2	3	0	1	2	2	2	1	6	0	1	6	2	4	2	0	SNB	Proteobacteria	Rhizobiales	Beijerinckiaceae	Microvirga
Otu1984	0	0	0	0	0	0	0	0	0	0	0	0	0	1	0	0	0	0	0	0	SNB	Proteobacteria	Rhizobiales	Beijerinckiaceae	Microvirga
Otu2592	1	0	0	0	0	0	0	0	0	0	0	0	0	0	0	0	0	0	0	1	SNB	Proteobacteria	Rhizobiales	Beijerinckiaceae	Microvirga
Otu1238	0	0	0	2	0	0	0	0	0	1	0	0	0	0	0	0	0	0	1	2	SNB	Proteobacteria	Rhizobiales	Beijerinckiaceae	Microvirga
Otu1736	0	0	1	0	0	1	0	0	0	0	0	0	1	0	0	0	2	0	1	0	SNB	Proteobacteria	Rhizobiales	Beijerinckiaceae	Microvirga
Microvirga	48	17	28	9	8	85	27	7	70	79	4	5	14	9	7	14	115	24	8	3	SNB	Proteobacteria	Rhizobiales	Beijerinckiaceae	Microvirga
Otu0013	544	562	358	852	688	174	585	438	608	693	203	256	236	67	84	120	15	215	62	159	SNB	Proteobacteria	Rhizobiales	Rhizobiaceae	Neorhizobium
Neorhizobium	544	562	358	852	688	174	585	438	608	693	203	256	236	67	84	120	15	215	62	159	SNB	Proteobacteria	Rhizobiales	Rhizobiaceae	Neorhizobium
Otu1303	0	0	0	0	0	0	1	2	0	2	0	0	1	0	0	0	0	0	0	0	SNB	Proteobacteria	Rhizobiales	Rhizobiaceae	Phyllobacterium
Phyllobacterium	0	0	0	0	0	0	1	2	0	2	0	0	1	0	0	0	0	0	0	0	SNB	Proteobacteria	Rhizobiales	Rhizobiaceae	Phyllobacterium
Otu0165	28	5	0	6	2	7	14	113	34	8	24	26	23	0	1	56	1	2	6	3	SNB	Proteobacteria	Rhizobiales	Rhizobiaceae	Rhizobium
Rhizobium	28	5	0	6	2	7	14	113	34	8	24	26	23	0	1	56	1	2	6	3	SNB	Proteobacteria	Rhizobiales	Rhizobiaceae	Rhizobium
Otu0148	14	9	15	21	18	36	13	21	22	38	1	1	8	1	24	3	2	77	3	80	SNB	Proteobacteria	Rhizobiales	Rhizobiaceae	Shinella
Shinella	14	9	15	21	18	36	13	21	22	38	1	1	8	1	24	3	2	77	3	80	SNB	Proteobacteria	Rhizobiales	Rhizobiaceae	Shinella
