# Supplementary material for: Nitrogen fixing bacteria facilitate microbial biodegradation of a bio-based and biodegradable plastic in soils under ambient and future climatic conditions
Source: Royal Society of Chemistry journal article supplement (doi:10.1039/d1em00426c), 2022-01-01
Supplement: d1em00426c4.xlsx [file d1em00426c4.xlsx]

## Sheet: Table S2
Table S2. Relative abundances of N fixing bacterial genera detected in PBSA (P) and surrounding soils (S) in laboratory experiment (at 90 days). PS = Normal soil + PBSA, PSN = Normal soil + Naddition+PBSA, Control S = Control soil at 90 days without PBSA/N. Classification of N fixing bacterial functional groups is presented in Table S1.
Fig4f																Fig4g
ASV	P-PS1	P-PS2	P-PS3	P-PS4	P-PS5	P-PSN1	P-PSN2	P-PSN3	P-PSN4	P-PSN5	Control S1	Control S2	Control S3	Control S4	Control S5	S-PS1	S-PS2	S-PS3	S-PS4	S-PS5	S-PSN1	S-PSN2	S-PSN3	S-PSN4	S-PSN5	Control S1	Control S2	Control S3	Control S4	Control S5
ANPR	2.56785	2.17601	3.08364	3.13362	0.671617	1.2551	0.0636514	0.721924	2.07684	5.1516	0.0315083	0.0340648	0.0438242	0.0295025	0.0324307	0.0475308	0.19947	0.0376923	0.0283374	0	0.117545	0.0563101	0.317846	0.452428	0.331514	0.0315083	0.0340648	0.0438242	0.0295025	0.0324307
Aminobacter	0.13515	0.101856	0.0805971	0.074967	0	0.0487986	0	0.0440611	0	0.476501	0.0969485	0.0652908	0.0622766	0.0658134	0.0810767	0.0736727	0.0272004	0.0636057	0.0772837	0	0.326774	0.022524	0.214104	0.0199601	0.603571	0.0969485	0.0652908	0.0622766	0.0658134	0.0810767
Azospirillum	0	0.55928	0	0	0	0	0	0	0	0	0	0	0	0	0	0	0.251604	0	0	0	0	0	0	0	0	0	0	0	0	0
Azotobacter	0.34821	5.98911	0.0870448	6.78451	4.00945	0	0	0	0	0	0	0	0	0	0	0.0190123	2.68831	0.0376923	0.450822	0.613131	0	0	0	0.785096	0	0	0	0	0	0
Bacillus	0.21306	0	0.238567	0.151433	0.713804	0	0.0418281	0	0.0421601	0	0.0460506	0.0454197	0.0415177	0.0340414	0.0370636	0.0404012	0.045334	0.0730288	0.0463702	0	0.0258598	0.218483	0	0	0.0198187	0.0460506	0.0454197	0.0415177	0.0340414	0.0370636
Bradyrhizobium	0.11766	5.72984	0.344955	0.0809644	0.676679	0	0	0	0	0	0.579268	0.533682	0.590474	0.524237	0.569853	2.65222	3.27311	2.67851	4.31501	1.15179	0.322073	0.295065	0.200861	0.257263	0.264851	0.579268	0.533682	0.590474	0.524237	0.569853
BCP	0.01908	0	0.0354627	0.0449802	0.0472494	0	0	0.0677863	0	0	0	0	0	0	0	0.00950616	0	0	0	0	0	0	0	0	0.0648614	0	0	0	0	0
Devosia	1.24338	1.7834	0.49003	1.56681	0.875802	1.07552	0.0363722	0.135573	0.181472	1.33735	0.428997	0.33497	0.528197	0.392611	0.419282	0.125957	0.308271	0.113077	0.221547	0.0893633	1.1778	0.141901	0.849796	0.201819	1.02337	0.428997	0.33497	0.528197	0.392611	0.419282
Mesorhizobium	0.580351	0.348161	0.375582	0.292371	0.0978738	0.0214714	0	0	0.0109983	0.170821	0.290846	0.170324	0.283704	0.190632	0.238597	0.373117	0.292404	0.346298	0.309135	0.156386	0.188072	0.0540577	0.227348	0.0776225	0.227015	0.290846	0.170324	0.283704	0.190632	0.238597
Methylobacterium	0	0.0129634	0.0338508	0.0194914	0.0269997	0	0	0	0	0	0	0	0	0	0	0	0	0	0	0	0	0	0	0	0	0	0	0	0	0
Microvirga	0.02544	0.140746	0.0580299	0.0329855	0.0725616	0	0	0.00508397	0	0	0.695606	0.704005	0.477454	0.560548	0.511941	0.43253	0.598409	0.475865	0.463702	0.496463	0.124597	0.148659	0.180995	0.197383	0.181972	0.695606	0.704005	0.477454	0.560548	0.511941
Mycobacterium	1.07643	4.42239	5.39678	1.31492	2.75734	0.286936	0.0272792	0.291481	0.104484	0.651817	0.412031	0.414455	0.267559	0.354031	0.370636	1.22629	1.03588	1.00591	0.935133	0.404617	0.641794	0.135144	0.611412	0.272788	0.789147	0.412031	0.414455	0.267559	0.354031	0.370636
Neorhizobium	1.0335	1.03708	2.09391	1.55332	0.62268	0	0	0	0	0	0.0315083	0	0	0	0.0416966	0.0237654	0.0725344	0.0353365	0	0	0.0329125	0.0810866	0.0375235	0.0687514	0.0216205	0.0315083	0	0	0	0.0416966
Phyllobacterium	0.159	0.705582	0.738269	0.36284	0.786365	0.306455	0.056377	0.0932061	0.320783	0.141602	0.302964	0.303744	0.394418	0.319989	0.326623	0.12358	0.142802	0.134279	0.115926	0.114186	0.312669	0.162173	0.361991	0.159681	0.300885	0.302964	0.303744	0.394418	0.319989	0.326623
Rhodopseudomonas	0	0	0.0370746	0.0344848	0.0337496	0.0878374	0	0.108458	0	0.0112382	0	0	0	0	0	0	0	0	0	0	0.874533	0	0.437038	0	1.02157	0	0	0	0	0
Shinella	0.434071	0.929664	0.185373	0.343349	0.19406	0	0	0	0.0549914	0	0.123609	0.0823232	0.138392	0.163399	0.101925	0.202006	0.296938	0.207308	0.28595	0.16135	0.0399652	0.0518053	0.0485598	0.23065	0	0.123609	0.0823232	0.138392	0.163399	0.101925
Sum	7.95319	23.9361	13.2792	15.7911	11.5862	3.08212	0.225508	1.46757	2.79173	7.94093	3.03934	2.68828	2.82782	2.6348	2.73113	5.34959	9.23227	5.2086	7.24921	3.18729	4.18459	1.36721	3.48747	2.72344	4.85019	3.03934	2.68828	2.82782	2.6348	2.73113
